# Supplementary material for: Regulatory Divergence of Transcript Isoforms in a Mammalian Model System
Source: PLoS One. 2015 Sep 4;10(9):e0137367. doi: 10.1371/journal.pone.0137367 (PMC4560434; doi:10.1371/journal.pone.0137367)
Supplement: S1 Table — (XLSX) [file pone.0137367.s005.xlsx]

## Sheet: Sheet1
															Isoform 1 Expression				Isoform 2 Expression
										Isoform Differences					F0 Strain Expression		F1 Allelic Expression		F0 Strain Expression		F1 Allelic Expression
gene_biotype	external_gene_id	isoform1_id	isoform2_id	transcript_biotype_isoform1	transcript_biotype_issoform2	isoforms_Nested	difference_protein	vep_isoform1	vep_isoform2	AFE	ALE	TSS	APA	INT	F0_BL6_1_i1	F0_CAST_i1	F1_BL6_i1	F1_CAST_i1	F0_BL6_i2	F0_CAST_i2	F1_BL6_i2	F1_CAST_i2	DIU_regulation	DGE_regulation
protein_coding	Thsd1	ENSMUST00000069828	ENSMUST00000160585	protein_coding	protein_coding	TRUE	TRUE	upstream_gene_variant=1;5_prime_UTR_variant=9;feature_truncation=25;intron_variant=386;feature_elongation=31;synonymous_variant=13;missense_variant=5;3_prime_UTR_variant=12;downstream_gene_variant=1	upstream_gene_variant=3;5_prime_UTR_variant=7;feature_truncation=23;intron_variant=386;feature_elongation=31;synonymous_variant=13;missense_variant=5;3_prime_UTR_variant=6;downstream_gene_variant=7	0	0	1	1	1	3.5	0.83	1.83	0.33	0.59	1	0.6	0.25	NA	CIS
pseudogene	3000002C10Rik	ENSMUST00000144161	ENSMUST00000125451	processed_transcript	processed_transcript	TRUE	NA	non_coding_exon_variant=75;nc_transcript_variant=87;feature_truncation=2;feature_elongation=4;intron_variant=12;upstream_gene_variant=3	downstream_gene_variant=29;non_coding_exon_variant=43;nc_transcript_variant=58;feature_elongation=1;intron_variant=15;feature_truncation=1;upstream_gene_variant=3	0	0	1	1	1	7.5	0.83	1.75	0.75	0.07	0.67	0.24	0.6	NA	Not in Dataset
protein_coding	Dlg5	ENSMUST00000166007	ENSMUST00000042009	protein_coding	protein_coding	TRUE	TRUE	downstream_gene_variant=1;3_prime_UTR_variant=7;missense_variant=1;intron_variant=106;feature_elongation=9;synonymous_variant=2;feature_truncation=3;upstream_gene_variant=40	downstream_gene_variant=1;3_prime_UTR_variant=7;synonymous_variant=16;intron_variant=475;feature_elongation=34;feature_truncation=23;missense_variant=5;splice_region_variant=1;upstream_gene_variant=80	1	0	0	0	1	7.5	1.17	1.42	2.25	0.9	0.75	0.89	0.62	NA	CONS
protein_coding	Spata1	ENSMUST00000029839	ENSMUST00000093951	protein_coding	protein_coding	TRUE	TRUE	intron_variant=267;feature_truncation=23;feature_elongation=17;missense_variant=1;synonymous_variant=1;5_prime_UTR_variant=1	downstream_gene_variant=53;3_prime_UTR_variant=16;feature_truncation=5;intron_variant=41;feature_elongation=1;5_prime_UTR_variant=2;upstream_gene_variant=47	1	1	0	0	0	2.83	1	0.83	0.08	0.72	0.57	0.39	0.5	cons	Not in Dataset
protein_coding	Dnd1	ENSMUST00000155827	ENSMUST00000124038	retained_intron	retained_intron	TRUE	NA	non_coding_exon_variant=12;nc_transcript_variant=35;intron_variant=23;feature_truncation=3;feature_elongation=3	non_coding_exon_variant=27;nc_transcript_variant=35;feature_truncation=3;feature_elongation=3;intron_variant=8	0	0	1	1	1	2.5	0.83	0.83	0.58	0.84	0.45	0.62	0.57	cons	CONS
protein_coding	Aim1l	ENSMUST00000121391	ENSMUST00000140125	protein_coding	retained_intron	TRUE	NA	upstream_gene_variant=6;intron_variant=229;feature_truncation=18;feature_elongation=17;synonymous_variant=9;missense_variant=8;splice_region_variant=1;downstream_gene_variant=3	upstream_gene_variant=42;intron_variant=79;nc_transcript_variant=106;feature_truncation=7;feature_elongation=7;non_coding_exon_variant=27;downstream_gene_variant=3	1	0	0	1	1	8.17	1.17	2.5	1.92	0.87	0.61	0.86	1	trans	CONS
protein_coding	Pparg	ENSMUST00000171644	ENSMUST00000000450	protein_coding	protein_coding	TRUE	TRUE	5_prime_UTR_variant=3;intron_variant=1120;feature_truncation=108;feature_elongation=105;splice_region_variant=1;synonymous_variant=3;3_prime_UTR_variant=2	upstream_gene_variant=32;intron_variant=610;feature_elongation=54;feature_truncation=56;splice_region_variant=1;synonymous_variant=3;3_prime_UTR_variant=2	1	0	0	0	0	46.33	1.5	13.33	0.58	0.25	0.7	0.45	1	NA	CIS&TRANS
protein_coding	Pld6	ENSMUST00000051493	ENSMUST00000125307	processed_transcript	protein_coding	TRUE	NA	non_coding_exon_variant=14;nc_transcript_variant=27;feature_truncation=2;feature_elongation=2;splice_region_variant=1;intron_variant=13;upstream_gene_variant=2	downstream_gene_variant=10;3_prime_UTR_variant=1;feature_elongation=1;synonymous_variant=3;splice_region_variant=1;intron_variant=13;upstream_gene_variant=2	0	0	1	1	1	6.17	1.83	5.42	0.75	0.59	0.8	0.58	0.67	NA	CIS
protein_coding	Crocc	ENSMUST00000122846	ENSMUST00000102491	retained_intron	protein_coding	TRUE	NA	downstream_gene_variant=1;non_coding_exon_variant=21;nc_transcript_variant=42;feature_elongation=4;feature_truncation=4;intron_variant=21;upstream_gene_variant=49	downstream_gene_variant=1;3_prime_UTR_variant=4;feature_elongation=29;feature_truncation=21;missense_variant=11;intron_variant=409;synonymous_variant=27;splice_region_variant=7;5_prime_UTR_variant=3;upstream_gene_variant=66	1	0	0	0	1	1.33	1.67	0.83	1.5	0.27	0.7	0.2	0.36	CIS&TRANS	CIS
protein_coding	Atxn7l2	ENSMUST00000141054	ENSMUST00000127157	retained_intron	protein_coding	TRUE	NA	intron_variant=14;nc_transcript_variant=27;non_coding_exon_variant=13;feature_truncation=1;feature_elongation=4;upstream_gene_variant=13	downstream_gene_variant=16;intron_variant=9;feature_elongation=4;synonymous_variant=1;5_prime_UTR_variant=11;feature_truncation=3;upstream_gene_variant=3	0	1	1	0	1	0.83	1.33	0.75	0.33	0.5	0.52	0.64	0.3	NA	CONS
protein_coding	Sytl1	ENSMUST00000030674	ENSMUST00000142039	protein_coding	processed_transcript	TRUE	NA	downstream_gene_variant=3;3_prime_UTR_variant=2;synonymous_variant=8;splice_region_variant=3;intron_variant=84;feature_elongation=4;feature_truncation=2;missense_variant=4;inframe_deletion=1;upstream_gene_variant=1	downstream_gene_variant=3;non_coding_exon_variant=29;nc_transcript_variant=99;splice_region_variant=2;intron_variant=70;feature_elongation=4;feature_truncation=3;upstream_gene_variant=1	0	0	1	1	1	34.5	2	24	1	0.86	0.76	0.77	0.83	cons	CIS
lincRNA	BC039771	ENSMUST00000144661	ENSMUST00000137180	processed_transcript	processed_transcript	TRUE	NA	intron_variant=442;nc_transcript_variant=450;feature_elongation=37;feature_truncation=34;non_coding_exon_variant=8;downstream_gene_variant=20	upstream_gene_variant=95;intron_variant=423;nc_transcript_variant=448;feature_truncation=29;feature_elongation=34;non_coding_exon_variant=25	1	1	0	0	0	1.67	2.17	0.58	1.25	0.67	0.78	0.48	0.66	cons	Not in Dataset
protein_coding	Zfp111	ENSMUST00000086006	ENSMUST00000148050	protein_coding	retained_intron	TRUE	NA	downstream_gene_variant=2;3_prime_UTR_variant=54;feature_truncation=15;feature_elongation=17;synonymous_variant=16;missense_variant=14;inframe_insertion=1;intron_variant=143;5_prime_UTR_variant=1;upstream_gene_variant=11	downstream_gene_variant=94;non_coding_exon_variant=38;nc_transcript_variant=64;feature_truncation=4;feature_elongation=7;intron_variant=26;upstream_gene_variant=11	0	1	1	0	0	5	1.83	1.08	0.5	0.92	0.61	1	0.63	cis	Not in Dataset
antisense	E430024P14Rik	ENSMUST00000160545	ENSMUST00000159947	antisense	antisense	TRUE	NA	downstream_gene_variant=33;non_coding_exon_variant=25;nc_transcript_variant=80;feature_elongation=10;feature_truncation=3;intron_variant=55;upstream_gene_variant=3	downstream_gene_variant=32;intron_variant=62;nc_transcript_variant=63;feature_truncation=2;feature_elongation=7;non_coding_exon_variant=1	1	0	0	1	0	0.67	2	4.5	0.67	0.3	0.63	0.45	1	NA	Not in Dataset
protein_coding	Skp2	ENSMUST00000096482	ENSMUST00000110585	protein_coding	protein_coding	TRUE	TRUE	3_prime_UTR_variant=17;feature_truncation=30;synonymous_variant=2;intron_variant=319;feature_elongation=21;splice_region_variant=2;5_prime_UTR_variant=2;upstream_gene_variant=3	3_prime_UTR_variant=60;feature_truncation=30;feature_elongation=21;intron_variant=277;synonymous_variant=1;splice_region_variant=2;5_prime_UTR_variant=2;upstream_gene_variant=3	0	0	0	0	1	4.33	1.83	1.5	0.33	0.81	0.55	0.69	0.4	NA	Not in Dataset
protein_coding	Col15a1	ENSMUST00000102917	ENSMUST00000107730	protein_coding	protein_coding	TRUE	TRUE	intron_variant=529;feature_truncation=29;feature_elongation=47;synonymous_variant=8;missense_variant=2;splice_region_variant=2	upstream_gene_variant=36;intron_variant=74;feature_elongation=6;feature_truncation=4;splice_region_variant=1;synonymous_variant=2	1	0	0	1	0	25.83	3	11.5	3.75	0.27	0.88	0.86	0	CIS&TRANS	CIS
protein_coding	Cyp4a31	ENSMUST00000030486	ENSMUST00000030480	protein_coding	protein_coding	TRUE	TRUE	missense_variant=8;intron_variant=129;feature_truncation=4;synonymous_variant=5;feature_elongation=5;splice_region_variant=1;3_prime_UTR_variant=6;downstream_gene_variant=4	missense_variant=6;intron_variant=130;feature_truncation=4;feature_elongation=5;synonymous_variant=4;splice_region_variant=1;3_prime_UTR_variant=8;downstream_gene_variant=4	0	0	1	1	1	12.17	3.67	3.5	0.25	0.19	1	0.42	1	cis	CONS
protein_coding	Cep57l1	ENSMUST00000105505	ENSMUST00000019951	protein_coding	protein_coding	TRUE	TRUE	downstream_gene_variant=1;3_prime_UTR_variant=3;synonymous_variant=4;intron_variant=230;feature_truncation=11;feature_elongation=16;missense_variant=1;splice_region_variant=1;upstream_gene_variant=37	downstream_gene_variant=1;3_prime_UTR_variant=3;synonymous_variant=4;intron_variant=718;feature_truncation=49;feature_elongation=67;missense_variant=1;splice_region_variant=1;5_prime_UTR_variant=1;upstream_gene_variant=24	1	0	0	1	1	8.5	2	1.17	0.92	0.57	0.52	0.4	0.6	NA	Not in Dataset
protein_coding	Trim6	ENSMUST00000144538	ENSMUST00000098180	retained_intron	protein_coding	TRUE	NA	upstream_gene_variant=3;non_coding_exon_variant=14;nc_transcript_variant=128;intron_variant=114;feature_elongation=14;feature_truncation=10;downstream_gene_variant=27	upstream_gene_variant=3;5_prime_UTR_variant=1;intron_variant=146;feature_elongation=19;feature_truncation=15;missense_variant=1;synonymous_variant=7;3_prime_UTR_variant=31;downstream_gene_variant=2	0	1	1	0	0	5.67	2.33	4.92	1.83	0.99	0.6	0.96	0.78	NA	CONS
protein_coding	Zfp324	ENSMUST00000038701	ENSMUST00000124387	protein_coding	nonsense_mediated_decay	TRUE	TRUE	5_prime_UTR_variant=4;intron_variant=41;feature_truncation=2;missense_variant=5;synonymous_variant=6;3_prime_UTR_variant=26;feature_elongation=1;downstream_gene_variant=4	5_prime_UTR_variant=4;NMD_transcript_variant=85;intron_variant=41;feature_truncation=3;3_prime_UTR_variant=40;feature_elongation=1;downstream_gene_variant=1	0	0	1	1	1	4.67	1.67	2.25	0.83	0.54	0.43	0.75	0.22	NA	CONS
protein_coding	Camk1d	ENSMUST00000044009	ENSMUST00000114987	protein_coding	protein_coding	TRUE	TRUE	3_prime_UTR_variant=57;feature_elongation=349;feature_truncation=379;intron_variant=5391;synonymous_variant=6	downstream_gene_variant=50;3_prime_UTR_variant=1;intron_variant=5012;feature_elongation=315;feature_truncation=351;synonymous_variant=6;upstream_gene_variant=57	1	0	0	1	0	127.33	4	54.25	0.5	0.97	1	0.96	1	cis	CIS&TRANS
pseudogene	Gm13826	ENSMUST00000100847	ENSMUST00000124641	lincRNA	transcribed_processed_pseudogene	TRUE	NA	downstream_gene_variant=1;non_coding_exon_variant=6;nc_transcript_variant=48;splice_region_variant=1;intron_variant=42;feature_truncation=3;feature_elongation=9;upstream_gene_variant=1	downstream_gene_variant=2;non_coding_exon_variant=5;nc_transcript_variant=5;upstream_gene_variant=29	1	0	0	1	1	844.17	4	825.75	0	0.05	1	0.15	NA	trans	Not in Dataset
protein_coding	Hace1	ENSMUST00000037044	ENSMUST00000155368	protein_coding	retained_intron	TRUE	NA	upstream_gene_variant=2;intron_variant=1276;feature_elongation=91;feature_truncation=102;splice_region_variant=6;synonymous_variant=10;3_prime_UTR_variant=3	upstream_gene_variant=57;splice_region_variant=2;intron_variant=194;nc_transcript_variant=278;feature_elongation=28;feature_truncation=17;non_coding_exon_variant=84	1	0	0	1	1	3.17	3.83	0.92	0.92	0.83	0.95	0.69	0.86	cons	CONS
protein_coding	2700049A03Rik	ENSMUST00000149564	ENSMUST00000129376	protein_coding	protein_coding	TRUE	TRUE	upstream_gene_variant=75;5_prime_UTR_variant=7;feature_elongation=79;intron_variant=794;feature_truncation=65;missense_variant=12;synonymous_variant=15;splice_region_variant=4;3_prime_UTR_variant=1;downstream_gene_variant=2	upstream_gene_variant=21;synonymous_variant=9;intron_variant=501;feature_truncation=43;missense_variant=6;feature_elongation=54;splice_region_variant=2;3_prime_UTR_variant=1;downstream_gene_variant=2	1	0	0	1	1	6	3.33	0.75	1.17	0.27	0.79	0.5	0.6	NA	CONS
protein_coding	Zmym6	ENSMUST00000046751	ENSMUST00000151461	protein_coding	processed_transcript	TRUE	NA	upstream_gene_variant=2;intron_variant=274;feature_elongation=21;feature_truncation=27;missense_variant=2;synonymous_variant=6;downstream_gene_variant=55	upstream_gene_variant=2;non_coding_exon_variant=7;nc_transcript_variant=194;intron_variant=187;feature_elongation=15;feature_truncation=19;downstream_gene_variant=24	0	1	1	0	1	5	2.67	1.33	0.42	0.75	0.62	0.56	0.4	NA	CONS
protein_coding	Aplf	ENSMUST00000032130	ENSMUST00000065997	protein_coding	protein_coding	TRUE	TRUE	3_prime_UTR_variant=21;feature_truncation=41;intron_variant=619;splice_region_variant=2;feature_elongation=45;synonymous_variant=6;missense_variant=11;5_prime_UTR_variant=2;upstream_gene_variant=2	3_prime_UTR_variant=23;feature_truncation=41;splice_region_variant=2;intron_variant=618;feature_elongation=45;synonymous_variant=6;missense_variant=12;upstream_gene_variant=2	0	0	0	0	1	9.83	2.17	1.42	0.92	0.33	0.45	0.52	0.5	NA	Not in Dataset
protein_coding	Lrrcc1	ENSMUST00000169079	ENSMUST00000167858	protein_coding	protein_coding	TRUE	TRUE	5_prime_UTR_variant=1;intron_variant=408;feature_elongation=28;feature_truncation=20;synonymous_variant=3;missense_variant=4;splice_region_variant=1;3_prime_UTR_variant=17;downstream_gene_variant=33	upstream_gene_variant=54;intron_variant=201;feature_elongation=11;synonymous_variant=1;feature_truncation=9;splice_region_variant=1;3_prime_UTR_variant=13;downstream_gene_variant=40	1	0	0	1	1	1.67	2.83	2.08	1.33	0.61	0.56	0.6	0.55	cons	Not in Dataset
protein_coding	Podn	ENSMUST00000106708	ENSMUST00000145491	protein_coding	processed_transcript	TRUE	NA	downstream_gene_variant=1;3_prime_UTR_variant=3;feature_elongation=11;intron_variant=161;feature_truncation=7;splice_region_variant=1;synonymous_variant=10;missense_variant=2;5_prime_UTR_variant=1;upstream_gene_variant=37	downstream_gene_variant=1;non_coding_exon_variant=33;nc_transcript_variant=177;feature_elongation=11;intron_variant=144;feature_truncation=7;splice_region_variant=1;upstream_gene_variant=37	0	0	1	1	1	3.67	1.67	2.17	0.58	0.6	0.33	0.21	0.25	NA	CIS&TRANS
protein_coding	Tdrd3	ENSMUST00000169504	ENSMUST00000168275	protein_coding	protein_coding	TRUE	TRUE	5_prime_UTR_variant=1;intron_variant=769;feature_elongation=77;feature_truncation=65;synonymous_variant=12;missense_variant=8;splice_donor_variant=1;splice_region_variant=1;3_prime_UTR_variant=9;downstream_gene_variant=16	5_prime_UTR_variant=1;intron_variant=1121;feature_elongation=113;feature_truncation=85;synonymous_variant=12;missense_variant=8;splice_donor_variant=1;splice_region_variant=1;3_prime_UTR_variant=1;downstream_gene_variant=3	0	1	0	0	0	5.17	3.67	2.75	4.75	0.72	0.72	0.69	0.27	cis	CONS
lincRNA	AC163280.1	ENSMUST00000180412	ENSMUST00000181044	lincRNA	lincRNA	TRUE	NA	upstream_gene_variant=1;non_coding_exon_variant=56;nc_transcript_variant=89;intron_variant=33;feature_elongation=13;feature_truncation=8;splice_region_variant=1;downstream_gene_variant=106	upstream_gene_variant=8;non_coding_exon_variant=58;nc_transcript_variant=185;intron_variant=127;feature_elongation=20;feature_truncation=16;splice_region_variant=1;downstream_gene_variant=3	1	1	0	0	1	7.83	4	3.17	1.58	0.91	0.77	0.96	0.64	CIS&TRANS	CONS
lincRNA	4833418N02Rik	ENSMUST00000137539	ENSMUST00000161759	lincRNA	lincRNA	TRUE	NA	non_coding_exon_variant=24;nc_transcript_variant=71;feature_elongation=8;intron_variant=47;feature_truncation=4;upstream_gene_variant=6	downstream_gene_variant=52;non_coding_exon_variant=8;nc_transcript_variant=16;intron_variant=8;feature_elongation=3;upstream_gene_variant=1	1	1	0	0	0	7	3.17	2	0.83	0.59	0.6	0.59	0.48	cons	Not in Dataset
protein_coding	Brdt	ENSMUST00000031215	ENSMUST00000162804	protein_coding	processed_transcript	TRUE	NA	intron_variant=388;feature_elongation=35;feature_truncation=33;5_prime_UTR_variant=1;synonymous_variant=8;missense_variant=4;splice_region_variant=1;3_prime_UTR_variant=5	upstream_gene_variant=29;non_coding_exon_variant=6;nc_transcript_variant=229;intron_variant=223;feature_truncation=18;feature_elongation=13;splice_region_variant=1;downstream_gene_variant=3	1	0	0	1	1	6	3.83	1.25	1.58	0.35	0.72	0.6	0.89	CIS&TRANS	CONS
protein_coding	Capn1	ENSMUST00000164843	ENSMUST00000025891	protein_coding	protein_coding	TRUE	FALSE	downstream_gene_variant=2;3_prime_UTR_variant=13;feature_truncation=18;feature_elongation=21;intron_variant=266;synonymous_variant=16;splice_region_variant=2	downstream_gene_variant=2;3_prime_UTR_variant=13;feature_truncation=17;feature_elongation=21;intron_variant=262;synonymous_variant=16;splice_region_variant=2;5_prime_UTR_variant=1;upstream_gene_variant=3	1	0	0	0	0	60.5	3.67	12	2.08	0.3	0.66	0.49	0.33	NA	CIS&TRANS
protein_coding	Il16	ENSMUST00000145610	ENSMUST00000151047	retained_intron	retained_intron	TRUE	NA	downstream_gene_variant=2;non_coding_exon_variant=18;nc_transcript_variant=127;feature_truncation=7;splice_region_variant=1;intron_variant=109;feature_elongation=12;upstream_gene_variant=76	downstream_gene_variant=49;non_coding_exon_variant=20;nc_transcript_variant=47;feature_elongation=4;feature_truncation=5;intron_variant=27;upstream_gene_variant=70	0	1	1	0	0	8.5	5	2.33	1.5	0.95	0.88	0.97	0.69	NA	CONS
protein_coding	Zfp142	ENSMUST00000113737	ENSMUST00000027315	protein_coding	protein_coding	TRUE	TRUE	3_prime_UTR_variant=10;feature_elongation=6;synonymous_variant=10;intron_variant=91;feature_truncation=9;missense_variant=4;5_prime_UTR_variant=1;upstream_gene_variant=2	downstream_gene_variant=7;3_prime_UTR_variant=3;synonymous_variant=10;intron_variant=90;feature_truncation=9;feature_elongation=5;missense_variant=5;5_prime_UTR_variant=1;upstream_gene_variant=2	0	0	1	1	1	2.17	2.67	0.5	0.33	0.38	0.46	0.25	0.6	cons	CONS
protein_coding	Pms1	ENSMUST00000027267	ENSMUST00000142922	protein_coding	processed_transcript	TRUE	NA	downstream_gene_variant=1;3_prime_UTR_variant=1;splice_region_variant=2;intron_variant=1592;feature_truncation=79;feature_elongation=109;synonymous_variant=6;missense_variant=6;5_prime_UTR_variant=2;upstream_gene_variant=2	downstream_gene_variant=85;non_coding_exon_variant=36;nc_transcript_variant=536;feature_truncation=26;intron_variant=500;feature_elongation=38;splice_region_variant=1;upstream_gene_variant=3	0	1	1	0	0	15.5	5	5.17	2.08	0.97	0.85	0.96	0.82	NA	CONS
protein_coding	4930522L14Rik	ENSMUST00000112547	ENSMUST00000100937	protein_coding	protein_coding	TRUE	TRUE	synonymous_variant=2;missense_variant=3;intron_variant=136;feature_elongation=10;feature_truncation=8;upstream_gene_variant=6	downstream_gene_variant=11;3_prime_UTR_variant=2;feature_elongation=10;feature_truncation=8;intron_variant=128;5_prime_UTR_variant=4;upstream_gene_variant=2	0	1	1	0	0	9	3.83	3.08	0.75	0.47	0.65	0.64	0.92	NA	CONS
protein_coding	Emcn	ENSMUST00000122064	ENSMUST00000119475	protein_coding	protein_coding	TRUE	TRUE	upstream_gene_variant=2;5_prime_UTR_variant=2;intron_variant=811;feature_elongation=70;feature_truncation=51;missense_variant=7;splice_region_variant=1;3_prime_UTR_variant=32;downstream_gene_variant=4	upstream_gene_variant=3;5_prime_UTR_variant=1;intron_variant=811;feature_elongation=68;feature_truncation=51;missense_variant=7;splice_region_variant=1;3_prime_UTR_variant=15;downstream_gene_variant=21	0	0	1	1	1	12.17	4.17	1.67	0.58	0.17	0.7	0.44	0.68	cons	CONS
protein_coding	Calhm2	ENSMUST00000140512	ENSMUST00000035822	protein_coding	protein_coding	TRUE	TRUE	downstream_gene_variant=1;3_prime_UTR_variant=26;feature_elongation=26;feature_truncation=25;splice_region_variant=3;intron_variant=329;splice_donor_variant=1;missense_variant=1;synonymous_variant=3;5_prime_UTR_variant=6	downstream_gene_variant=79;3_prime_UTR_variant=17;feature_truncation=9;intron_variant=48;feature_elongation=3;synonymous_variant=1;5_prime_UTR_variant=6	0	1	0	0	0	5.5	2.33	1.92	0.58	0.02	0.39	0.12	0.42	NA	Not in Dataset
protein_coding	Rarres1	ENSMUST00000178314	ENSMUST00000054825	protein_coding	protein_coding	TRUE	TRUE	downstream_gene_variant=1;3_prime_UTR_variant=5;feature_elongation=28;intron_variant=460;feature_truncation=32;splice_region_variant=1;synonymous_variant=7;missense_variant=4;5_prime_UTR_variant=3;upstream_gene_variant=1	downstream_gene_variant=2;3_prime_UTR_variant=4;feature_elongation=28;intron_variant=460;feature_truncation=32;splice_region_variant=1;synonymous_variant=9;missense_variant=5;upstream_gene_variant=1	0	0	0	1	0	258.17	6	153.67	0.17	0.36	1	0.51	1	NA	CIS&TRANS
protein_coding	4930523C07Rik	ENSMUST00000163892	ENSMUST00000060298	protein_coding	processed_transcript	TRUE	NA	5_prime_UTR_variant=7;intron_variant=171;feature_truncation=7;feature_elongation=18;3_prime_UTR_variant=26	non_coding_exon_variant=11;nc_transcript_variant=140;intron_variant=129;feature_truncation=6;feature_elongation=11;downstream_gene_variant=53	0	1	1	0	0	19.17	6	11.5	6.25	0.96	0.98	0.97	0.93	cons	Not in Dataset
lincRNA	E130218I03Rik	ENSMUST00000144222	ENSMUST00000134320	processed_transcript	processed_transcript	TRUE	NA	intron_variant=2;nc_transcript_variant=27;non_coding_exon_variant=25;feature_truncation=1;feature_elongation=1;downstream_gene_variant=4	non_coding_exon_variant=12;nc_transcript_variant=20;intron_variant=8;downstream_gene_variant=11	1	0	0	1	1	0	4.17	1.58	1.17	NA	0.67	0.54	0.76	trans	Not in Dataset
lincRNA	AL672219.1	ENSMUST00000180865	ENSMUST00000181099	lincRNA	lincRNA	TRUE	NA	non_coding_exon_variant=26;nc_transcript_variant=44;feature_truncation=4;feature_elongation=3;splice_region_variant=1;intron_variant=18	downstream_gene_variant=24;non_coding_exon_variant=4;nc_transcript_variant=20;feature_elongation=2;intron_variant=16;feature_truncation=1	0	1	1	0	1	4.17	3	1.25	0.67	0.93	0.48	0.9	0.52	NA	Not in Dataset
protein_coding	Sox17	ENSMUST00000027035	ENSMUST00000116652	protein_coding	protein_coding	TRUE	FALSE	3_prime_UTR_variant=11;feature_truncation=5;missense_variant=2;synonymous_variant=3;intron_variant=26;splice_region_variant=4;5_prime_UTR_variant=16;feature_elongation=7	downstream_gene_variant=11;missense_variant=2;synonymous_variant=3;intron_variant=38;splice_region_variant=3;5_prime_UTR_variant=4;feature_elongation=7;feature_truncation=4	0	0	1	1	1	4.17	3.67	3.42	3.67	0.92	0.58	0.46	0.7	NA	CONS
antisense	Gm15952	ENSMUST00000122858	ENSMUST00000144542	antisense	antisense	TRUE	NA	upstream_gene_variant=16;intron_variant=87;nc_transcript_variant=89;feature_truncation=8;feature_elongation=13;non_coding_exon_variant=2	upstream_gene_variant=16;intron_variant=29;nc_transcript_variant=37;feature_truncation=4;feature_elongation=7;non_coding_exon_variant=8;downstream_gene_variant=52	0	1	1	0	0	13.83	2.67	3.5	2.5	0.86	0.42	0.6	0.37	NA	Not in Dataset
protein_coding	Hmha1	ENSMUST00000099501	ENSMUST00000150022	protein_coding	retained_intron	TRUE	NA	upstream_gene_variant=29;5_prime_UTR_variant=2;intron_variant=102;feature_truncation=8;splice_region_variant=4;synonymous_variant=9;feature_elongation=10;missense_variant=2;3_prime_UTR_variant=1;downstream_gene_variant=1	upstream_gene_variant=44;intron_variant=62;nc_transcript_variant=72;non_coding_exon_variant=10;feature_elongation=5;feature_truncation=4;splice_region_variant=1;downstream_gene_variant=1	1	0	0	1	1	8	5.83	1.92	3	0.48	0.91	0.8	0.21	CIS&TRANS	CONS
protein_coding	Ccbe1	ENSMUST00000061103	ENSMUST00000151343	nonsense_mediated_decay	processed_transcript	TRUE	NA	downstream_gene_variant=113;3_prime_UTR_variant=61;NMD_transcript_variant=3512;intron_variant=3444;feature_truncation=186;feature_elongation=239;synonymous_variant=6;splice_region_variant=1;missense_variant=1;upstream_gene_variant=66	downstream_gene_variant=44;non_coding_exon_variant=31;nc_transcript_variant=429;feature_elongation=37;intron_variant=398;feature_truncation=27	1	1	0	0	0	2.83	5.5	2.25	1.58	0.9	0.85	0.84	0.78	cons	CONS
protein_coding	Fgd5	ENSMUST00000089334	ENSMUST00000146743	protein_coding	processed_transcript	TRUE	NA	5_prime_UTR_variant=1;intron_variant=1107;feature_truncation=62;feature_elongation=71;splice_region_variant=4;synonymous_variant=18;missense_variant=8;3_prime_UTR_variant=16;downstream_gene_variant=3	upstream_gene_variant=34;non_coding_exon_variant=18;nc_transcript_variant=65;splice_region_variant=1;intron_variant=47;feature_truncation=6;feature_elongation=5;downstream_gene_variant=3	1	0	0	0	0	8.5	5.83	3.08	3.25	0.44	0.89	0.47	0.78	NA	CONS
protein_coding	Sclt1	ENSMUST00000026866	ENSMUST00000140373	protein_coding	retained_intron	TRUE	NA	downstream_gene_variant=1;3_prime_UTR_variant=4;feature_truncation=84;feature_elongation=95;intron_variant=1073;splice_region_variant=2;synonymous_variant=7;missense_variant=3;5_prime_UTR_variant=5	downstream_gene_variant=43;non_coding_exon_variant=36;nc_transcript_variant=210;intron_variant=174;feature_truncation=19;feature_elongation=20;upstream_gene_variant=52	1	1	0	0	0	7.5	6.5	0.92	1.67	0.89	0.98	0.56	0.71	cons	CONS
lincRNA	A530017D24Rik	ENSMUST00000101077	ENSMUST00000148413	lincRNA	lincRNA	TRUE	NA	downstream_gene_variant=2;non_coding_exon_variant=35;nc_transcript_variant=49;feature_truncation=5;feature_elongation=2;intron_variant=14;upstream_gene_variant=17	downstream_gene_variant=4;non_coding_exon_variant=31;nc_transcript_variant=53;feature_truncation=4;feature_elongation=3;splice_region_variant=1;intron_variant=22;upstream_gene_variant=23	1	0	0	1	1	8.17	3.83	2.67	1.75	0.56	0.56	0.46	0.43	cons	Not in Dataset
protein_coding	Shank3	ENSMUST00000039074	ENSMUST00000066545	protein_coding	protein_coding	TRUE	TRUE	intron_variant=137;feature_truncation=19;feature_elongation=8;synonymous_variant=4;3_prime_UTR_variant=4;downstream_gene_variant=1	intron_variant=140;feature_truncation=19;feature_elongation=8;synonymous_variant=1;3_prime_UTR_variant=4;downstream_gene_variant=1	1	0	0	1	1	8	3.17	0.75	3.67	0.22	0.46	0.33	0.45	NA	CONS
protein_coding	Dph2	ENSMUST00000139332	ENSMUST00000125781	retained_intron	nonsense_mediated_decay	TRUE	NA	downstream_gene_variant=3;non_coding_exon_variant=24;nc_transcript_variant=41;feature_truncation=5;intron_variant=17;splice_region_variant=2;feature_elongation=3	downstream_gene_variant=3;3_prime_UTR_variant=12;NMD_transcript_variant=41;feature_truncation=5;intron_variant=26;splice_region_variant=2;feature_elongation=3;synonymous_variant=1;5_prime_UTR_variant=2	0	0	1	1	1	9.5	2.67	1.67	2.5	0.35	0.38	0.5	0.38	cons	CONS
protein_coding	Zfyve16	ENSMUST00000022217	ENSMUST00000156586	protein_coding	retained_intron	TRUE	NA	downstream_gene_variant=2;3_prime_UTR_variant=16;feature_elongation=25;feature_truncation=42;synonymous_variant=13;intron_variant=376;missense_variant=10;splice_region_variant=4;5_prime_UTR_variant=2;upstream_gene_variant=1	downstream_gene_variant=9;non_coding_exon_variant=23;nc_transcript_variant=321;feature_truncation=33;intron_variant=298;feature_elongation=20;splice_region_variant=4;upstream_gene_variant=27	1	0	0	1	1	3.33	7	1.67	2	0.56	0.99	0.77	0.84	NA	CONS
protein_coding	Siglec1	ENSMUST00000028794	ENSMUST00000110227	protein_coding	protein_coding	TRUE	TRUE	3_prime_UTR_variant=1;synonymous_variant=12;intron_variant=74;feature_elongation=2;missense_variant=13;splice_region_variant=5;feature_truncation=4;5_prime_UTR_variant=5;upstream_gene_variant=2	downstream_gene_variant=5;3_prime_UTR_variant=2;frameshift_variant=1;feature_elongation=2;intron_variant=68;missense_variant=13;synonymous_variant=11;splice_region_variant=5;feature_truncation=4;5_prime_UTR_variant=5;upstream_gene_variant=2	0	1	0	0	0	4.83	4.83	0.92	1.5	0.89	0.68	0.64	0.61	cons	CONS
protein_coding	Poc1b	ENSMUST00000020113	ENSMUST00000159990	protein_coding	protein_coding	TRUE	TRUE	upstream_gene_variant=3;intron_variant=1285;synonymous_variant=10;feature_truncation=76;feature_elongation=89;splice_region_variant=2;missense_variant=2;3_prime_UTR_variant=19;downstream_gene_variant=2	upstream_gene_variant=3;5_prime_UTR_variant=14;intron_variant=1273;feature_truncation=78;feature_elongation=89;synonymous_variant=8;splice_region_variant=2;missense_variant=2;3_prime_UTR_variant=21	0	0	1	1	1	14.83	3.5	3.25	2.67	0.71	0.48	0.42	0.79	cons	Not in Dataset
protein_coding	Ssx2ip	ENSMUST00000106153	ENSMUST00000106151	protein_coding	protein_coding	TRUE	TRUE	5_prime_UTR_variant=4;intron_variant=443;feature_truncation=45;feature_elongation=33;splice_region_variant=1;missense_variant=1;synonymous_variant=4;3_prime_UTR_variant=6;downstream_gene_variant=2	5_prime_UTR_variant=5;intron_variant=442;feature_truncation=45;feature_elongation=33;splice_region_variant=1;missense_variant=1;synonymous_variant=4;3_prime_UTR_variant=6;downstream_gene_variant=2	0	0	1	1	1	11.33	7.33	1.42	1.5	0.78	1	0.21	0.93	cis	CONS
lincRNA	D030028A08Rik	ENSMUST00000131501	ENSMUST00000135825	processed_transcript	processed_transcript	TRUE	NA	non_coding_exon_variant=40;nc_transcript_variant=431;intron_variant=391;feature_elongation=22;feature_truncation=27;splice_region_variant=4;downstream_gene_variant=21	upstream_gene_variant=83;intron_variant=160;nc_transcript_variant=192;non_coding_exon_variant=32;feature_truncation=13;feature_elongation=2;downstream_gene_variant=2	1	1	0	0	0	1.5	4.83	1.58	1.58	0.11	0.65	0.44	0.81	NA	Not in Dataset
protein_coding	Triobp	ENSMUST00000109688	ENSMUST00000130663	protein_coding	protein_coding	TRUE	TRUE	upstream_gene_variant=40;synonymous_variant=11;intron_variant=278;feature_elongation=23;feature_truncation=18;inframe_deletion=1;splice_region_variant=3;3_prime_UTR_variant=10;downstream_gene_variant=2	upstream_gene_variant=40;5_prime_UTR_variant=1;intron_variant=112;feature_elongation=12;feature_truncation=5;synonymous_variant=2;inframe_deletion=1;3_prime_UTR_variant=7;downstream_gene_variant=80	0	1	1	0	0	10.5	3.5	2.58	5.92	0.49	0.46	0.77	0.41	cons	CIS
protein_coding	Nsun3	ENSMUST00000063089	ENSMUST00000143314	protein_coding	nonsense_mediated_decay	TRUE	TRUE	downstream_gene_variant=2;3_prime_UTR_variant=36;feature_truncation=28;feature_elongation=20;synonymous_variant=4;intron_variant=394;missense_variant=1;5_prime_UTR_variant=7;upstream_gene_variant=5	downstream_gene_variant=2;3_prime_UTR_variant=38;NMD_transcript_variant=442;feature_truncation=28;feature_elongation=20;intron_variant=394;synonymous_variant=2;missense_variant=1;5_prime_UTR_variant=7;upstream_gene_variant=5	0	0	0	0	1	19.5	6.33	3.83	0.42	0.31	0.83	0.56	0.33	trans	CIS
protein_coding	Tcf4	ENSMUST00000078486	ENSMUST00000146908	protein_coding	retained_intron	TRUE	NA	upstream_gene_variant=7;5_prime_UTR_variant=2;intron_variant=3117;feature_elongation=298;feature_truncation=242;synonymous_variant=5;splice_region_variant=4;3_prime_UTR_variant=39;downstream_gene_variant=4	upstream_gene_variant=35;non_coding_exon_variant=48;nc_transcript_variant=70;feature_elongation=7;feature_truncation=11;intron_variant=22;downstream_gene_variant=35	1	0	0	1	0	8.5	7	3.42	2.83	0.99	0.9	0.99	0.54	cons	CONS
lincRNA	6330418K02Rik	ENSMUST00000124298	ENSMUST00000125662	processed_transcript	processed_transcript	TRUE	NA	upstream_gene_variant=13;intron_variant=7;nc_transcript_variant=8;feature_truncation=1;non_coding_exon_variant=1	upstream_gene_variant=13;intron_variant=5;nc_transcript_variant=8;feature_truncation=1;non_coding_exon_variant=3	0	0	1	0	1	6	7.83	0.75	8.83	0.54	0.98	0.5	0.77	trans	Not in Dataset
protein_coding	Tle3	ENSMUST00000178113	ENSMUST00000159140	protein_coding	retained_intron	TRUE	NA	5_prime_UTR_variant=2;feature_elongation=61;intron_variant=415;feature_truncation=31;synonymous_variant=7;splice_region_variant=5;3_prime_UTR_variant=14;downstream_gene_variant=2	upstream_gene_variant=61;non_coding_exon_variant=57;nc_transcript_variant=139;feature_truncation=9;feature_elongation=21;intron_variant=82;splice_region_variant=4;downstream_gene_variant=3	1	0	0	1	1	7.67	4.67	0.83	2.17	0.74	0.58	0.33	0.67	cons	CONS
protein_coding	Gm5431	ENSMUST00000109210	ENSMUST00000109212	protein_coding	protein_coding	TRUE	TRUE	downstream_gene_variant=4;3_prime_UTR_variant=12;feature_truncation=6;feature_elongation=10;stop_gained=1;missense_variant=14;synonymous_variant=10;intron_variant=144;5_prime_UTR_variant=5;upstream_gene_variant=1	downstream_gene_variant=11;3_prime_UTR_variant=5;feature_elongation=10;stop_gained=1;missense_variant=20;synonymous_variant=19;intron_variant=132;feature_truncation=5;5_prime_UTR_variant=2;upstream_gene_variant=1	0	0	0	1	1	0.83	4.5	0	2.08	1	0.55	NA	0.64	trans	Not in Dataset
protein_coding	Abcc5	ENSMUST00000134413	ENSMUST00000134962	retained_intron	retained_intron	FALSE	NA	non_coding_exon_variant=18;nc_transcript_variant=946;intron_variant=928;feature_elongation=76;splice_region_variant=4;feature_truncation=51;upstream_gene_variant=24	downstream_gene_variant=44;non_coding_exon_variant=25;nc_transcript_variant=237;feature_truncation=19;feature_elongation=24;intron_variant=212;splice_region_variant=1	1	1	0	0	0	3.67	2.83	0.92	0.83	0.51	0.34	0.08	0.25	cons	CONS
protein_coding	Gp49a	ENSMUST00000102894	ENSMUST00000139982	protein_coding	processed_transcript	TRUE	NA	upstream_gene_variant=2;5_prime_UTR_variant=1;missense_variant=23;synonymous_variant=6;splice_region_variant=6;intron_variant=70;feature_truncation=4;stop_gained=1;feature_elongation=1;3_prime_UTR_variant=8;downstream_gene_variant=1	upstream_gene_variant=3;non_coding_exon_variant=18;nc_transcript_variant=98;splice_region_variant=5;intron_variant=79;feature_truncation=3;feature_elongation=1;splice_acceptor_variant=1;downstream_gene_variant=11	0	1	1	0	1	8.33	4.5	4.42	6.92	0.41	0.54	0.3	0.79	CIS&TRANS	CIS&TRANS
protein_coding	Gls	ENSMUST00000114513	ENSMUST00000155587	protein_coding	protein_coding	TRUE	TRUE	3_prime_UTR_variant=26;feature_elongation=30;synonymous_variant=2;missense_variant=1;intron_variant=362;feature_truncation=32;inframe_deletion=4;5_prime_UTR_variant=4	downstream_gene_variant=23;3_prime_UTR_variant=16;feature_truncation=11;intron_variant=109;feature_elongation=8;synonymous_variant=1;upstream_gene_variant=8	1	1	0	0	0	6.33	6.67	0.92	1.58	0.29	0.79	0.79	0.92	cis	CONS
protein_coding	Zfp668	ENSMUST00000054415	ENSMUST00000106261	protein_coding	protein_coding	TRUE	FALSE	3_prime_UTR_variant=1;missense_variant=1;intron_variant=42;synonymous_variant=1;feature_truncation=5;feature_elongation=9;5_prime_UTR_variant=10;upstream_gene_variant=29	downstream_gene_variant=1;missense_variant=1;intron_variant=39;synonymous_variant=1;feature_truncation=5;feature_elongation=8;5_prime_UTR_variant=2;upstream_gene_variant=36	1	0	0	1	0	2.83	3.17	2.25	1.75	0.8	0.36	0.44	0.77	NA	CONS
protein_coding	Hyls1	ENSMUST00000115110	ENSMUST00000132547	protein_coding	retained_intron	TRUE	NA	3_prime_UTR_variant=4;synonymous_variant=2;intron_variant=59;feature_elongation=8;feature_truncation=6;5_prime_UTR_variant=1;upstream_gene_variant=2	downstream_gene_variant=19;non_coding_exon_variant=33;nc_transcript_variant=47;feature_truncation=5;feature_elongation=7;intron_variant=14;upstream_gene_variant=2	0	1	1	0	0	6.33	6.33	1.33	5.67	1	0.71	0.95	0.87	trans	CONS
protein_coding	Ehbp1l1	ENSMUST00000049295	ENSMUST00000075606	protein_coding	protein_coding	TRUE	TRUE	intron_variant=122;splice_region_variant=2;synonymous_variant=12;feature_truncation=10;missense_variant=15;feature_elongation=11;5_prime_UTR_variant=6	intron_variant=144;splice_region_variant=2;synonymous_variant=4;feature_truncation=10;missense_variant=1;feature_elongation=11;5_prime_UTR_variant=6	0	0	0	0	1	12.67	6.5	6.25	2.25	0.42	0.7	0.67	0.66	cons	CIS
protein_coding	Spice1	ENSMUST00000050897	ENSMUST00000133168	protein_coding	retained_intron	TRUE	NA	upstream_gene_variant=2;5_prime_UTR_variant=13;feature_elongation=19;intron_variant=397;feature_truncation=35;synonymous_variant=5;missense_variant=3;splice_region_variant=1;3_prime_UTR_variant=8	upstream_gene_variant=53;non_coding_exon_variant=7;nc_transcript_variant=142;intron_variant=135;feature_truncation=14;feature_elongation=5;splice_region_variant=1;downstream_gene_variant=11	1	1	0	0	0	4.17	5.5	0.75	2.42	0.42	0.58	0.29	0.6	cons	Not in Dataset
protein_coding	Zfp956	ENSMUST00000101445	ENSMUST00000140719	protein_coding	nonsense_mediated_decay	TRUE	TRUE	upstream_gene_variant=1;5_prime_UTR_variant=2;intron_variant=112;feature_elongation=6;feature_truncation=6;missense_variant=1;synonymous_variant=5;3_prime_UTR_variant=10;downstream_gene_variant=2	upstream_gene_variant=2;5_prime_UTR_variant=1;NMD_transcript_variant=129;intron_variant=112;feature_elongation=6;feature_truncation=6;missense_variant=1;synonymous_variant=2;3_prime_UTR_variant=13;downstream_gene_variant=2	0	0	1	1	1	6	5	2.5	0.42	0.46	0.52	0.46	0.75	NA	Not in Dataset
protein_coding	Tmem14a	ENSMUST00000027065	ENSMUST00000027064	protein_coding	protein_coding	TRUE	TRUE	5_prime_UTR_variant=4;feature_elongation=11;intron_variant=117;feature_truncation=7;3_prime_UTR_variant=8;downstream_gene_variant=3	upstream_gene_variant=2;5_prime_UTR_variant=2;feature_elongation=11;intron_variant=114;feature_truncation=7;splice_acceptor_variant=1;frameshift_variant=1;missense_variant=1;3_prime_UTR_variant=8;downstream_gene_variant=3	0	0	1	1	1	34.17	9.67	18.92	5.25	0.83	1	0.69	0.89	cis	CONS
protein_coding	Flt1	ENSMUST00000031653	ENSMUST00000110529	protein_coding	protein_coding	TRUE	TRUE	3_prime_UTR_variant=17;feature_truncation=153;feature_elongation=155;intron_variant=2304;missense_variant=7;synonymous_variant=15;splice_region_variant=6;5_prime_UTR_variant=2	downstream_gene_variant=35;3_prime_UTR_variant=25;feature_truncation=89;feature_elongation=81;intron_variant=1348;synonymous_variant=10;missense_variant=4;splice_region_variant=4;5_prime_UTR_variant=2	0	1	1	0	0	9.67	8	4.42	3.5	0.84	0.82	0.87	0.88	cons	CONS
protein_coding	Smyd3	ENSMUST00000128302	ENSMUST00000111134	protein_coding	protein_coding	TRUE	TRUE	downstream_gene_variant=3;3_prime_UTR_variant=77;feature_truncation=432;synonymous_variant=3;intron_variant=7242;feature_elongation=484;missense_variant=3;splice_region_variant=2;upstream_gene_variant=1	downstream_gene_variant=6;3_prime_UTR_variant=1;intron_variant=1502;feature_truncation=100;feature_elongation=110;synonymous_variant=1;missense_variant=2;upstream_gene_variant=1	0	1	1	0	0	3.5	4.5	0.75	1.33	0.75	0.46	0.67	0.37	NA	CONS
protein_coding	Zfp595	ENSMUST00000109735	ENSMUST00000168892	protein_coding	protein_coding	TRUE	FALSE	3_prime_UTR_variant=21;feature_elongation=8;intron_variant=71;missense_variant=3;feature_truncation=6;synonymous_variant=1	downstream_gene_variant=9;3_prime_UTR_variant=19;missense_variant=3;intron_variant=64;feature_truncation=6;feature_elongation=6;synonymous_variant=1	0	0	1	1	1	7.5	7.17	3.08	3.25	0.66	0.71	0.65	0.7	cons	CONS
protein_coding	Ccdc34	ENSMUST00000028580	ENSMUST00000078939	protein_coding	processed_transcript	TRUE	NA	synonymous_variant=1;intron_variant=88;feature_elongation=11;feature_truncation=5;splice_region_variant=1;missense_variant=1;downstream_gene_variant=37	upstream_gene_variant=18;non_coding_exon_variant=3;nc_transcript_variant=45;feature_elongation=8;intron_variant=42;feature_truncation=2;downstream_gene_variant=10	1	1	0	0	0	2.83	5.33	2.08	1.5	0.68	0.52	0.56	0.26	NA	CONS
lincRNA	Nlrc5	ENSMUST00000053085	ENSMUST00000137032	processed_transcript	retained_intron	TRUE	NA	non_coding_exon_variant=33;nc_transcript_variant=422;intron_variant=389;feature_truncation=28;feature_elongation=31;splice_region_variant=4;downstream_gene_variant=1	upstream_gene_variant=37;non_coding_exon_variant=8;nc_transcript_variant=10;intron_variant=2;downstream_gene_variant=1	1	0	0	1	0	26.83	8.83	5.5	2.58	0.38	0.83	0.82	0.89	cons	CONS
protein_coding	Vrk2	ENSMUST00000109504	ENSMUST00000078362	protein_coding	protein_coding	TRUE	FALSE	synonymous_variant=3;intron_variant=1591;feature_elongation=96;feature_truncation=84;missense_variant=2;splice_region_variant=1;upstream_gene_variant=22	synonymous_variant=3;intron_variant=1611;feature_elongation=97;feature_truncation=86;missense_variant=2;splice_region_variant=1;5_prime_UTR_variant=2	1	0	0	1	0	12.67	4.83	5.33	4	0.5	0.45	0.3	0.76	NA	CONS
protein_coding	Zfp282	ENSMUST00000061890	ENSMUST00000125957	protein_coding	retained_intron	TRUE	NA	upstream_gene_variant=3;5_prime_UTR_variant=3;feature_elongation=20;intron_variant=294;feature_truncation=16;splice_region_variant=1;synonymous_variant=7;missense_variant=1;3_prime_UTR_variant=14	upstream_gene_variant=6;intron_variant=132;nc_transcript_variant=165;feature_truncation=5;splice_region_variant=1;non_coding_exon_variant=33;feature_elongation=8;downstream_gene_variant=63	0	1	1	0	0	8.5	9.17	4.83	3.83	0.92	0.85	0.93	0.87	cons	CONS
protein_coding	Slc15a3	ENSMUST00000025646	ENSMUST00000138263	protein_coding	retained_intron	TRUE	NA	upstream_gene_variant=48;5_prime_UTR_variant=2;feature_elongation=8;synonymous_variant=9;intron_variant=132;feature_truncation=11;missense_variant=4;splice_region_variant=1;downstream_gene_variant=44	upstream_gene_variant=48;non_coding_exon_variant=36;nc_transcript_variant=156;feature_elongation=8;intron_variant=120;feature_truncation=11;downstream_gene_variant=52	0	0	1	1	1	24.67	8.33	7.67	2.75	0.95	0.77	0.9	0.78	trans	CONS
protein_coding	Bdp1	ENSMUST00000038104	ENSMUST00000099262	protein_coding	nonsense_mediated_decay	TRUE	TRUE	downstream_gene_variant=1;3_prime_UTR_variant=20;feature_elongation=76;feature_truncation=66;intron_variant=700;missense_variant=22;synonymous_variant=8;splice_region_variant=2;5_prime_UTR_variant=1;upstream_gene_variant=2	downstream_gene_variant=1;3_prime_UTR_variant=35;NMD_transcript_variant=309;feature_elongation=24;feature_truncation=29;intron_variant=272;missense_variant=2;upstream_gene_variant=36	1	0	0	1	1	6.5	8.5	1.5	1.92	0.37	0.78	0.56	0.5	NA	CONS
protein_coding	Hhip	ENSMUST00000155850	ENSMUST00000079038	processed_transcript	protein_coding	TRUE	NA	non_coding_exon_variant=1;nc_transcript_variant=235;intron_variant=234;feature_truncation=16;feature_elongation=16;splice_region_variant=1;upstream_gene_variant=57	downstream_gene_variant=17;3_prime_UTR_variant=12;feature_truncation=64;intron_variant=831;feature_elongation=65;splice_region_variant=5;synonymous_variant=7;missense_variant=1;5_prime_UTR_variant=3;upstream_gene_variant=1	1	1	0	0	0	4	7.33	0.58	2.33	0.77	0.67	0.12	0.52	CIS&TRANS	CIS
protein_coding	Wars2	ENSMUST00000004343	ENSMUST00000135960	protein_coding	processed_transcript	TRUE	NA	upstream_gene_variant=3;5_prime_UTR_variant=1;feature_truncation=49;missense_variant=2;intron_variant=651;feature_elongation=43;synonymous_variant=1;3_prime_UTR_variant=49;downstream_gene_variant=59	upstream_gene_variant=3;non_coding_exon_variant=33;nc_transcript_variant=684;feature_truncation=48;intron_variant=651;feature_elongation=43;downstream_gene_variant=71	0	0	1	1	1	5.33	10	2.25	2.17	0.69	0.91	0.54	0.67	NA	CONS
protein_coding	Bmp2k	ENSMUST00000035635	ENSMUST00000112974	protein_coding	protein_coding	TRUE	TRUE	5_prime_UTR_variant=2;intron_variant=860;feature_truncation=54;feature_elongation=69;synonymous_variant=8;inframe_deletion=1;missense_variant=4;3_prime_UTR_variant=26	5_prime_UTR_variant=2;intron_variant=709;feature_truncation=45;feature_elongation=51;synonymous_variant=5;inframe_deletion=1;missense_variant=1;3_prime_UTR_variant=6;downstream_gene_variant=53	0	1	0	0	0	7	7.5	4.42	4.58	0.46	0.68	0.74	0.73	NA	CONS
protein_coding	Gys1	ENSMUST00000003964	ENSMUST00000140994	protein_coding	retained_intron	TRUE	NA	upstream_gene_variant=43;intron_variant=282;feature_elongation=24;synonymous_variant=5;feature_truncation=19;splice_region_variant=1;3_prime_UTR_variant=13	upstream_gene_variant=97;non_coding_exon_variant=12;nc_transcript_variant=13;feature_truncation=1;intron_variant=1;downstream_gene_variant=69	1	1	0	0	0	5.83	9	3.33	5.83	0.82	0.81	0.75	0.44	NA	CIS
protein_coding	Zfp58	ENSMUST00000171518	ENSMUST00000076123	protein_coding	protein_coding	TRUE	FALSE	downstream_gene_variant=3;3_prime_UTR_variant=6;feature_elongation=8;feature_truncation=4;synonymous_variant=4;intron_variant=77;upstream_gene_variant=1	downstream_gene_variant=3;3_prime_UTR_variant=6;feature_elongation=8;feature_truncation=4;synonymous_variant=4;intron_variant=77;5_prime_UTR_variant=1	0	0	1	1	1	8.67	5.17	2.08	2.58	0.29	0.46	0.38	0.4	NA	CONS
protein_coding	Tbc1d14	ENSMUST00000171385	ENSMUST00000156658	protein_coding	retained_intron	FALSE	NA	3_prime_UTR_variant=4;synonymous_variant=2;intron_variant=174;feature_truncation=9;feature_elongation=12;upstream_gene_variant=53	downstream_gene_variant=74;non_coding_exon_variant=38;nc_transcript_variant=338;feature_elongation=26;intron_variant=300;feature_truncation=10;upstream_gene_variant=38	1	1	0	0	0	22	7.33	3.25	1.33	0.99	0.65	0.67	0.75	NA	CIS&TRANS
protein_coding	Zfp407	ENSMUST00000125763	ENSMUST00000143597	protein_coding	processed_transcript	TRUE	NA	downstream_gene_variant=49;3_prime_UTR_variant=4;feature_elongation=278;synonymous_variant=23;missense_variant=22;intron_variant=3414;feature_truncation=214;upstream_gene_variant=2	downstream_gene_variant=68;non_coding_exon_variant=27;nc_transcript_variant=1234;feature_elongation=93;intron_variant=1207;feature_truncation=71;upstream_gene_variant=39	1	1	0	0	0	5.83	10.5	4.83	3.5	0.94	0.93	0.95	0.91	cons	CONS
protein_coding	Zfp26	ENSMUST00000159569	ENSMUST00000161248	protein_coding	retained_intron	TRUE	NA	downstream_gene_variant=1;3_prime_UTR_variant=28;feature_truncation=20;feature_elongation=11;synonymous_variant=10;missense_variant=6;intron_variant=129;splice_region_variant=1;5_prime_UTR_variant=5	downstream_gene_variant=27;non_coding_exon_variant=24;nc_transcript_variant=123;feature_truncation=14;feature_elongation=9;intron_variant=99	0	1	1	0	1	7	10	2.67	4.83	0.98	0.85	0.91	0.94	NA	CIS
protein_coding	Abcb9	ENSMUST00000031354	ENSMUST00000126970	protein_coding	retained_intron	TRUE	NA	downstream_gene_variant=1;3_prime_UTR_variant=7;feature_truncation=27;feature_elongation=27;missense_variant=2;intron_variant=330;synonymous_variant=6;5_prime_UTR_variant=4;upstream_gene_variant=3	downstream_gene_variant=50;non_coding_exon_variant=16;nc_transcript_variant=75;feature_truncation=6;intron_variant=59;feature_elongation=10;upstream_gene_variant=3	0	1	1	0	0	5.83	10.5	4.42	4.92	0.77	0.89	0.67	0.96	cis	CONS
protein_coding	Arhgap32	ENSMUST00000174641	ENSMUST00000168954	protein_coding	protein_coding	TRUE	TRUE	intron_variant=1429;feature_elongation=131;feature_truncation=113;synonymous_variant=19;splice_region_variant=1;missense_variant=2;3_prime_UTR_variant=49	upstream_gene_variant=21;5_prime_UTR_variant=6;intron_variant=303;feature_elongation=26;feature_truncation=23;synonymous_variant=14;splice_region_variant=1;missense_variant=2;3_prime_UTR_variant=14;downstream_gene_variant=35	1	0	0	1	0	6.5	5.5	4.08	1.83	0.31	0.46	0.28	0.42	cons	CONS
protein_coding	Ednra	ENSMUST00000034029	ENSMUST00000146561	protein_coding	retained_intron	TRUE	NA	downstream_gene_variant=1;3_prime_UTR_variant=26;feature_truncation=49;feature_elongation=46;intron_variant=751;synonymous_variant=2;missense_variant=2;5_prime_UTR_variant=4	downstream_gene_variant=51;non_coding_exon_variant=35;nc_transcript_variant=715;feature_elongation=42;intron_variant=680;feature_truncation=43	0	1	1	0	0	8.33	11.33	4.83	5.42	0.98	0.94	0.96	0.98	cons	CONS
protein_coding	D16Ertd472e	ENSMUST00000114220	ENSMUST00000114218	protein_coding	protein_coding	TRUE	FALSE	downstream_gene_variant=2;3_prime_UTR_variant=7;intron_variant=351;feature_truncation=31;feature_elongation=24;missense_variant=2;synonymous_variant=1;splice_region_variant=1;5_prime_UTR_variant=4;upstream_gene_variant=2	downstream_gene_variant=5;3_prime_UTR_variant=4;intron_variant=354;feature_truncation=31;feature_elongation=24;missense_variant=2;synonymous_variant=1;5_prime_UTR_variant=1;upstream_gene_variant=2	0	0	0	1	1	3.83	9.17	3.67	7.67	0.71	0.73	0.56	0.65	cons	CONS
protein_coding	Bicd2	ENSMUST00000110085	ENSMUST00000048544	protein_coding	protein_coding	TRUE	TRUE	upstream_gene_variant=1;intron_variant=307;feature_elongation=17;feature_truncation=15;synonymous_variant=8;3_prime_UTR_variant=1;downstream_gene_variant=2	upstream_gene_variant=1;intron_variant=300;feature_elongation=17;feature_truncation=15;synonymous_variant=8;3_prime_UTR_variant=8;downstream_gene_variant=2	0	0	0	0	1	7.5	4.67	2.42	2.5	0.35	0.37	0.14	0.31	cons	CONS
protein_coding	Mlxip	ENSMUST00000068237	ENSMUST00000135961	protein_coding	nonsense_mediated_decay	TRUE	TRUE	intron_variant=418;feature_elongation=46;feature_truncation=41;synonymous_variant=7;splice_region_variant=2;3_prime_UTR_variant=35;downstream_gene_variant=1	upstream_gene_variant=30;intron_variant=68;NMD_transcript_variant=110;synonymous_variant=2;feature_elongation=9;feature_truncation=12;3_prime_UTR_variant=40;downstream_gene_variant=1	1	0	0	1	1	5.67	11.17	4.33	1.83	0.51	0.88	0.25	0.64	cis	CONS
protein_coding	1110054O05Rik	ENSMUST00000095063	ENSMUST00000128548	protein_coding	processed_transcript	TRUE	NA	downstream_gene_variant=1;3_prime_UTR_variant=18;feature_truncation=17;intron_variant=78;feature_elongation=12;5_prime_UTR_variant=1;upstream_gene_variant=82	downstream_gene_variant=43;non_coding_exon_variant=7;nc_transcript_variant=55;intron_variant=48;feature_truncation=7;feature_elongation=6;upstream_gene_variant=81	0	1	1	0	0	11.83	11.83	4.33	3.42	0.78	0.93	0.94	0.91	cons	CONS
protein_coding	Cc2d2a	ENSMUST00000048150	ENSMUST00000125866	protein_coding	protein_coding	TRUE	TRUE	5_prime_UTR_variant=10;feature_elongation=78;feature_truncation=63;intron_variant=1257;missense_variant=3;synonymous_variant=26;splice_region_variant=8;3_prime_UTR_variant=1;downstream_gene_variant=16	upstream_gene_variant=74;intron_variant=807;feature_elongation=47;feature_truncation=40;splice_region_variant=6;synonymous_variant=21;missense_variant=1;3_prime_UTR_variant=1;downstream_gene_variant=16	1	0	0	0	1	5	2.17	1.5	0.5	0.21	0.17	0.21	0.6	NA	CONS
protein_coding	Cdc73	ENSMUST00000018337	ENSMUST00000162638	protein_coding	processed_transcript	TRUE	NA	downstream_gene_variant=1;3_prime_UTR_variant=53;feature_elongation=70;feature_truncation=38;intron_variant=411	downstream_gene_variant=31;non_coding_exon_variant=12;nc_transcript_variant=168;feature_truncation=14;feature_elongation=28;intron_variant=156;upstream_gene_variant=24	1	0	0	1	0	9.67	10.5	4.17	4.5	0.76	0.82	0.94	0.95	cons	CONS
protein_coding	Lace1	ENSMUST00000041024	ENSMUST00000151747	protein_coding	protein_coding	TRUE	TRUE	3_prime_UTR_variant=7;intron_variant=2041;feature_truncation=130;feature_elongation=144;synonymous_variant=4;splice_region_variant=1;missense_variant=3;5_prime_UTR_variant=1	3_prime_UTR_variant=7;intron_variant=2043;feature_truncation=130;feature_elongation=144;synonymous_variant=3;splice_region_variant=1;missense_variant=2;upstream_gene_variant=1	0	0	1	0	1	21.33	10	6.75	7.5	0.52	0.78	0.65	0.5	NA	CIS
protein_coding	Ptp4a3	ENSMUST00000165541	ENSMUST00000053232	protein_coding	protein_coding	TRUE	FALSE	5_prime_UTR_variant=11;feature_truncation=18;splice_region_variant=1;intron_variant=351;feature_elongation=30;synonymous_variant=1;3_prime_UTR_variant=36;downstream_gene_variant=1	upstream_gene_variant=23;intron_variant=98;feature_truncation=7;feature_elongation=11;5_prime_UTR_variant=3;synonymous_variant=1;3_prime_UTR_variant=36;downstream_gene_variant=1	1	0	0	0	0	10	8	0.92	2.25	0.48	0.62	0.56	0.6	NA	CONS
protein_coding	Zbtb46	ENSMUST00000029106	ENSMUST00000087409	protein_coding	protein_coding	TRUE	TRUE	downstream_gene_variant=24;3_prime_UTR_variant=11;feature_elongation=57;feature_truncation=50;synonymous_variant=8;intron_variant=584	downstream_gene_variant=50;3_prime_UTR_variant=3;feature_truncation=28;intron_variant=393;feature_elongation=41;synonymous_variant=3	0	1	0	0	0	7.5	7.33	5.08	2.08	0.75	0.56	0.81	0.69	NA	CONS
protein_coding	Zdhhc24	ENSMUST00000006632	ENSMUST00000162754	protein_coding	processed_transcript	TRUE	NA	missense_variant=2;intron_variant=44;feature_truncation=5;feature_elongation=6;synonymous_variant=1;3_prime_UTR_variant=21;downstream_gene_variant=1	upstream_gene_variant=9;non_coding_exon_variant=5;nc_transcript_variant=38;intron_variant=33;feature_elongation=2;feature_truncation=1;downstream_gene_variant=22	1	0	0	1	0	4.17	6.33	0.58	2.08	0.55	0.48	0.19	0.62	cons	CIS&TRANS
protein_coding	Ccdc111	ENSMUST00000040468	ENSMUST00000136335	protein_coding	retained_intron	TRUE	NA	3_prime_UTR_variant=18;intron_variant=458;feature_truncation=27;synonymous_variant=3;missense_variant=4;feature_elongation=20;splice_region_variant=1	downstream_gene_variant=1;non_coding_exon_variant=34;nc_transcript_variant=482;intron_variant=448;feature_truncation=27;feature_elongation=20;splice_region_variant=1	0	0	0	1	1	10.67	11.83	4.67	6.92	0.9	0.89	0.76	0.95	cons	CONS
protein_coding	C130039O16Rik	ENSMUST00000046266	ENSMUST00000110294	protein_coding	protein_coding	TRUE	FALSE	3_prime_UTR_variant=23;feature_truncation=60;intron_variant=653;missense_variant=4;feature_elongation=43;synonymous_variant=5;5_prime_UTR_variant=1;splice_region_variant=1	3_prime_UTR_variant=23;feature_truncation=37;intron_variant=400;missense_variant=4;feature_elongation=29;synonymous_variant=5;5_prime_UTR_variant=3;upstream_gene_variant=52	1	0	0	1	0	12.67	7.33	2.92	2.25	0.91	0.55	0.57	0.56	NA	CONS
protein_coding	Cbfa2t2	ENSMUST00000045270	ENSMUST00000137526	protein_coding	protein_coding	TRUE	TRUE	intron_variant=600;feature_elongation=62;feature_truncation=70;synonymous_variant=5;3_prime_UTR_variant=37;downstream_gene_variant=2	upstream_gene_variant=28;intron_variant=209;feature_truncation=24;feature_elongation=13;synonymous_variant=3;3_prime_UTR_variant=37;downstream_gene_variant=2	1	0	0	0	1	6.5	10.67	3.75	1.25	0.71	0.8	0.71	0	NA	Not in Dataset
protein_coding	Mterf	ENSMUST00000044746	ENSMUST00000117463	protein_coding	protein_coding	TRUE	FALSE	downstream_gene_variant=1;3_prime_UTR_variant=4;feature_truncation=3;missense_variant=2;synonymous_variant=2;intron_variant=30;feature_elongation=2	downstream_gene_variant=1;3_prime_UTR_variant=4;feature_truncation=3;missense_variant=2;synonymous_variant=2;intron_variant=15;feature_elongation=2;5_prime_UTR_variant=15	0	0	1	1	1	8.17	6.33	1	3.58	0.52	0.47	0.17	0.91	CIS&TRANS	CONS
protein_coding	Zfp952	ENSMUST00000129057	ENSMUST00000087666	processed_transcript	protein_coding	TRUE	NA	upstream_gene_variant=1;non_coding_exon_variant=9;nc_transcript_variant=85;intron_variant=76;feature_truncation=5;feature_elongation=9;downstream_gene_variant=54	upstream_gene_variant=2;intron_variant=138;feature_truncation=14;feature_elongation=12;synonymous_variant=3;missense_variant=4;inframe_insertion=1;downstream_gene_variant=1	0	1	1	0	0	4.5	6.33	1.67	4.08	0.49	0.47	0.4	0.81	cis	Not in Dataset
protein_coding	Vps33b	ENSMUST00000032749	ENSMUST00000135470	protein_coding	retained_intron	TRUE	NA	upstream_gene_variant=5;5_prime_UTR_variant=1;intron_variant=163;feature_elongation=9;feature_truncation=12;splice_region_variant=4;synonymous_variant=1;3_prime_UTR_variant=3	upstream_gene_variant=24;intron_variant=3;nc_transcript_variant=9;non_coding_exon_variant=6;feature_truncation=1;downstream_gene_variant=5	1	1	0	0	0	14.83	12.33	2.75	4.42	0.83	0.91	0.54	0.46	NA	CONS
protein_coding	Capn8	ENSMUST00000048941	ENSMUST00000168514	protein_coding	protein_coding	TRUE	TRUE	upstream_gene_variant=1;5_prime_UTR_variant=1;synonymous_variant=8;intron_variant=992;feature_elongation=45;feature_truncation=63;missense_variant=7;splice_region_variant=1;3_prime_UTR_variant=3;downstream_gene_variant=2	upstream_gene_variant=1;5_prime_UTR_variant=1;synonymous_variant=4;intron_variant=568;feature_elongation=30;feature_truncation=37;missense_variant=1;3_prime_UTR_variant=8;downstream_gene_variant=81	0	1	0	0	0	4.33	3.83	9.92	0.92	0.16	0.28	0.26	0.25	cons	Not in Dataset
protein_coding	Prkd2	ENSMUST00000168093	ENSMUST00000086104	protein_coding	protein_coding	TRUE	FALSE	intron_variant=248;5_prime_UTR_variant=1;feature_elongation=14;feature_truncation=21;synonymous_variant=12;missense_variant=1;splice_region_variant=2;3_prime_UTR_variant=4;downstream_gene_variant=2	5_prime_UTR_variant=2;intron_variant=247;feature_elongation=14;feature_truncation=21;synonymous_variant=12;missense_variant=1;splice_region_variant=2;3_prime_UTR_variant=4;downstream_gene_variant=2	1	0	0	0	0	21.17	5.5	2.92	1.83	0.74	0.4	0.61	0.69	NA	CIS
lincRNA	AY512931	ENSMUST00000139751	ENSMUST00000166107	processed_transcript	processed_transcript	TRUE	NA	downstream_gene_variant=1;non_coding_exon_variant=33;nc_transcript_variant=79;feature_truncation=6;intron_variant=46;splice_region_variant=1;feature_elongation=7	downstream_gene_variant=8;non_coding_exon_variant=1;nc_transcript_variant=1;upstream_gene_variant=71	1	0	0	1	1	0.5	10	1.92	4.08	0	0.72	0	1	CIS&TRANS	Not in Dataset
protein_coding	Lrrc40	ENSMUST00000072080	ENSMUST00000156597	protein_coding	nonsense_mediated_decay	TRUE	TRUE	intron_variant=240;feature_elongation=21;feature_truncation=23;synonymous_variant=3;missense_variant=1;splice_region_variant=1;3_prime_UTR_variant=11;downstream_gene_variant=2	intron_variant=240;NMD_transcript_variant=250;feature_elongation=21;feature_truncation=23;3_prime_UTR_variant=10;splice_region_variant=1;downstream_gene_variant=7	0	0	1	1	1	14.17	11	4.17	4.83	0.51	0.79	0.81	0.38	CIS&TRANS	CONS
protein_coding	Vps8	ENSMUST00000117598	ENSMUST00000118138	protein_coding	protein_coding	TRUE	TRUE	upstream_gene_variant=4;splice_region_variant=5;intron_variant=2678;feature_truncation=178;feature_elongation=198;5_prime_UTR_variant=1;synonymous_variant=19;missense_variant=4;3_prime_UTR_variant=5;downstream_gene_variant=1	upstream_gene_variant=74;5_prime_UTR_variant=5;intron_variant=1543;feature_elongation=101;feature_truncation=92;missense_variant=3;synonymous_variant=8;splice_region_variant=2;3_prime_UTR_variant=5;downstream_gene_variant=1	1	0	0	1	0	7.67	7.5	1.33	5.42	0.41	0.53	0.56	0.47	cons	CONS
protein_coding	Acn9	ENSMUST00000040826	ENSMUST00000123848	protein_coding	processed_transcript	TRUE	NA	upstream_gene_variant=1;5_prime_UTR_variant=1;feature_elongation=49;missense_variant=1;intron_variant=822;feature_truncation=57;synonymous_variant=1;3_prime_UTR_variant=49	upstream_gene_variant=1;non_coding_exon_variant=15;nc_transcript_variant=178;feature_elongation=12;intron_variant=163;feature_truncation=13;splice_region_variant=1;downstream_gene_variant=47	0	1	1	0	1	13	13.67	7.67	6.42	0.7	0.95	0.8	0.77	trans	CONS
protein_coding	Zfp605	ENSMUST00000112528	ENSMUST00000144089	protein_coding	processed_transcript	TRUE	NA	5_prime_UTR_variant=2;intron_variant=246;feature_truncation=19;feature_elongation=21;synonymous_variant=7;splice_region_variant=1;missense_variant=16;3_prime_UTR_variant=16;downstream_gene_variant=1	upstream_gene_variant=1;non_coding_exon_variant=15;nc_transcript_variant=253;feature_truncation=17;intron_variant=238;feature_elongation=19;splice_region_variant=1;downstream_gene_variant=34	1	0	0	1	1	4.83	12.83	1.58	6.5	1	0.89	1	0.86	cons	CIS&TRANS
protein_coding	Pgm2l1	ENSMUST00000084935	ENSMUST00000054436	protein_coding	protein_coding	TRUE	FALSE	5_prime_UTR_variant=1;intron_variant=316;feature_truncation=32;feature_elongation=22;synonymous_variant=1;missense_variant=2;3_prime_UTR_variant=26;downstream_gene_variant=18	5_prime_UTR_variant=1;intron_variant=356;feature_truncation=33;feature_elongation=24;synonymous_variant=1;missense_variant=2;3_prime_UTR_variant=4	0	1	1	0	0	2.5	3.33	0.75	0.5	0.18	0.23	0.33	0.47	cons	Not in Dataset
protein_coding	Adat3	ENSMUST00000038411	ENSMUST00000178231	protein_coding	protein_coding	TRUE	FALSE	upstream_gene_variant=1;intron_variant=14;feature_truncation=1;feature_elongation=1;synonymous_variant=6;3_prime_UTR_variant=1;downstream_gene_variant=27	upstream_gene_variant=14;5_prime_UTR_variant=1;synonymous_variant=6;3_prime_UTR_variant=16;intron_variant=46;feature_truncation=4;splice_region_variant=1;feature_elongation=7;downstream_gene_variant=1	1	1	0	0	0	3.33	9.17	6.08	5	0.58	0.63	0.74	0.38	cons	CONS
protein_coding	Dip2b	ENSMUST00000100203	ENSMUST00000108971	protein_coding	protein_coding	TRUE	TRUE	upstream_gene_variant=1;5_prime_UTR_variant=1;intron_variant=1633;feature_truncation=140;feature_elongation=130;synonymous_variant=7;splice_region_variant=1;splice_donor_variant=1;coding_sequence_variant=1;3_prime_UTR_variant=30;downstream_gene_variant=1	upstream_gene_variant=25;intron_variant=520;feature_truncation=43;feature_elongation=50;synonymous_variant=7;splice_region_variant=1;splice_donor_variant=1;coding_sequence_variant=1;3_prime_UTR_variant=30;downstream_gene_variant=1	1	0	0	0	1	4	9.33	0.67	1.92	0.63	0.64	0.5	0.5	NA	CONS
protein_coding	Hsf2bp	ENSMUST00000002145	ENSMUST00000133308	protein_coding	protein_coding	TRUE	TRUE	downstream_gene_variant=1;3_prime_UTR_variant=24;feature_elongation=39;feature_truncation=52;missense_variant=2;synonymous_variant=3;intron_variant=786	downstream_gene_variant=21;3_prime_UTR_variant=6;missense_variant=2;intron_variant=631;feature_elongation=35;feature_truncation=38;synonymous_variant=1;upstream_gene_variant=45	1	0	0	1	1	2.67	8.33	5.5	1.58	0.67	0.57	0.72	0.83	cons	Not in Dataset
protein_coding	Tmem67	ENSMUST00000050686	ENSMUST00000108293	protein_coding	protein_coding	TRUE	TRUE	3_prime_UTR_variant=2;intron_variant=454;feature_elongation=39;feature_truncation=43;splice_region_variant=3;synonymous_variant=10;missense_variant=4;upstream_gene_variant=31	downstream_gene_variant=2;intron_variant=480;feature_elongation=40;feature_truncation=44;splice_region_variant=3;synonymous_variant=10;missense_variant=6;5_prime_UTR_variant=2;upstream_gene_variant=1	1	0	0	1	0	4.17	2.5	2.17	0.33	0.58	0.17	0.33	0.33	cons	CONS
protein_coding	Mkl1	ENSMUST00000149582	ENSMUST00000154797	protein_coding	retained_intron	TRUE	NA	downstream_gene_variant=21;3_prime_UTR_variant=4;feature_elongation=132;synonymous_variant=3;intron_variant=1297;feature_truncation=103;missense_variant=2;5_prime_UTR_variant=4	downstream_gene_variant=21;intron_variant=4;nc_transcript_variant=7;non_coding_exon_variant=3;upstream_gene_variant=44	1	1	0	0	0	7.67	13.83	3.08	3.33	0.82	0.93	0.54	0.94	cons	CONS
protein_coding	Rab11fip1	ENSMUST00000033878	ENSMUST00000054212	protein_coding	protein_coding	TRUE	TRUE	downstream_gene_variant=2;3_prime_UTR_variant=47;feature_elongation=35;feature_truncation=35;intron_variant=301;missense_variant=7;synonymous_variant=7	downstream_gene_variant=2;3_prime_UTR_variant=47;feature_elongation=34;feature_truncation=35;intron_variant=286;missense_variant=17;synonymous_variant=11;inframe_insertion=1	0	0	0	0	1	13.33	13.17	3.92	5.75	0.89	0.88	0.79	0.92	cons	CONS
protein_coding	Sspo	ENSMUST00000169350	ENSMUST00000043676	protein_coding	protein_coding	TRUE	TRUE	missense_variant=41;intron_variant=399;feature_elongation=20;splice_region_variant=13;feature_truncation=21;synonymous_variant=38;inframe_insertion=1	missense_variant=41;intron_variant=399;feature_elongation=20;feature_truncation=21;synonymous_variant=38;splice_region_variant=15;inframe_insertion=1	0	0	0	0	1	0.33	13.67	0.25	2.67	0.67	0.91	0.4	0.89	NA	Not in Dataset
lincRNA	2900005J15Rik	ENSMUST00000171190	ENSMUST00000128569	processed_transcript	processed_transcript	TRUE	NA	non_coding_exon_variant=13;nc_transcript_variant=13;feature_truncation=3;downstream_gene_variant=47	upstream_gene_variant=4;non_coding_exon_variant=14;nc_transcript_variant=74;intron_variant=60;feature_truncation=4;splice_region_variant=1;feature_elongation=5;downstream_gene_variant=7	0	1	1	0	1	13.83	14	7.58	8.08	0.76	0.93	0.91	0.98	NA	Not in Dataset
protein_coding	Rnf152	ENSMUST00000058688	ENSMUST00000172299	protein_coding	protein_coding	TRUE	FALSE	downstream_gene_variant=2;3_prime_UTR_variant=80;feature_elongation=50;feature_truncation=49;synonymous_variant=3;5_prime_UTR_variant=1;intron_variant=733	downstream_gene_variant=2;3_prime_UTR_variant=80;feature_elongation=50;feature_truncation=49;synonymous_variant=3;5_prime_UTR_variant=1;intron_variant=733	0	0	0	0	1	12.33	8	3.58	2.42	0.51	0.53	0.43	0.4	NA	CIS&TRANS
pseudogene	Gm12338	ENSMUST00000074576	ENSMUST00000122170	processed_pseudogene	processed_pseudogene	TRUE	NA	downstream_gene_variant=1;non_coding_exon_variant=1;nc_transcript_variant=1	downstream_gene_variant=1;non_coding_exon_variant=1;nc_transcript_variant=1	0	0	1	1	1	2628.17	15.17	1965.58	3.5	0.1	1	0.15	0.75	cis	Not in Dataset
pseudogene	Gm12481	ENSMUST00000056074	ENSMUST00000102482	processed_pseudogene	processed_pseudogene	TRUE	NA	upstream_gene_variant=2;non_coding_exon_variant=5;nc_transcript_variant=5	upstream_gene_variant=4;non_coding_exon_variant=3;nc_transcript_variant=3	0	0	1	1	1	1627.67	11.5	2009.92	2.17	0.81	0.75	0.77	1	NA	Not in Dataset
protein_coding	Orc6	ENSMUST00000034132	ENSMUST00000170141	protein_coding	protein_coding	TRUE	TRUE	upstream_gene_variant=1;5_prime_UTR_variant=2;synonymous_variant=3;intron_variant=36;feature_elongation=10;feature_truncation=7;missense_variant=1;splice_region_variant=1;3_prime_UTR_variant=8;downstream_gene_variant=2	upstream_gene_variant=1;5_prime_UTR_variant=3;intron_variant=36;feature_elongation=10;feature_truncation=7;missense_variant=1;synonymous_variant=2;splice_region_variant=1;3_prime_UTR_variant=8;downstream_gene_variant=2	0	0	0	0	1	17.83	7.83	6	4.25	0.92	0.51	0.89	0.77	NA	Not in Dataset
protein_coding	C2cd3	ENSMUST00000051777	ENSMUST00000151573	protein_coding	protein_coding	TRUE	TRUE	5_prime_UTR_variant=1;intron_variant=1006;feature_elongation=85;feature_truncation=73;synonymous_variant=19;splice_region_variant=3;missense_variant=17;3_prime_UTR_variant=3;downstream_gene_variant=1	upstream_gene_variant=47;missense_variant=1;synonymous_variant=1;intron_variant=115;feature_elongation=15;feature_truncation=6;3_prime_UTR_variant=3;downstream_gene_variant=1	1	0	0	1	0	26.5	10	2.58	7.5	0.24	0.64	0.71	0.55	cons	CONS
protein_coding	Gm10125	ENSMUST00000074702	ENSMUST00000161383	protein_coding	protein_coding	TRUE	TRUE	downstream_gene_variant=32;3_prime_UTR_variant=8;feature_truncation=15;intron_variant=155;feature_elongation=9;missense_variant=2;upstream_gene_variant=1	downstream_gene_variant=35;synonymous_variant=3;missense_variant=8;intron_variant=102;feature_truncation=9;feature_elongation=4;upstream_gene_variant=1	0	1	1	0	1	2.33	8	2.58	5.75	0.54	0.51	0.71	0.11	CIS&TRANS	CONS
protein_coding	Rif1	ENSMUST00000125376	ENSMUST00000152178	processed_transcript	processed_transcript	TRUE	NA	upstream_gene_variant=37;non_coding_exon_variant=22;nc_transcript_variant=57;feature_truncation=6;intron_variant=35;feature_elongation=6;downstream_gene_variant=1	upstream_gene_variant=35;non_coding_exon_variant=13;nc_transcript_variant=53;feature_truncation=6;intron_variant=40;feature_elongation=7	0	0	1	1	1	9	6	0.92	1.25	0.08	0.38	0.56	0.28	cons	CONS
protein_coding	Iigp1	ENSMUST00000066912	ENSMUST00000032473	protein_coding	protein_coding	TRUE	FALSE	upstream_gene_variant=2;5_prime_UTR_variant=2;intron_variant=12	upstream_gene_variant=2;5_prime_UTR_variant=2;intron_variant=12	0	0	0	0	1	446.83	14.5	13.08	0.75	0.3	0.91	0.48	0.2	NA	Not in Dataset
protein_coding	Fam81a	ENSMUST00000034749	ENSMUST00000141775	protein_coding	protein_coding	TRUE	TRUE	3_prime_UTR_variant=8;feature_truncation=42;synonymous_variant=6;intron_variant=607;feature_elongation=53;splice_region_variant=1;5_prime_UTR_variant=1;upstream_gene_variant=2	downstream_gene_variant=53;synonymous_variant=1;intron_variant=180;feature_truncation=9;splice_region_variant=1;feature_elongation=18	1	1	0	0	0	3.5	15.17	2.42	2.83	0.62	0.95	0.33	0.97	cis	CONS
protein_coding	Mfsd4	ENSMUST00000163016	ENSMUST00000112370	retained_intron	protein_coding	TRUE	NA	downstream_gene_variant=3;non_coding_exon_variant=15;nc_transcript_variant=60;intron_variant=45;feature_truncation=4;feature_elongation=3;upstream_gene_variant=31	downstream_gene_variant=27;3_prime_UTR_variant=9;splice_region_variant=1;intron_variant=418;feature_truncation=30;feature_elongation=28;missense_variant=2;synonymous_variant=2	1	1	0	0	0	0.83	15.17	1.75	1.58	0.17	0.95	0.73	0.75	trans	Not in Dataset
protein_coding	Col6a3	ENSMUST00000097653	ENSMUST00000150769	protein_coding	retained_intron	TRUE	NA	downstream_gene_variant=8;3_prime_UTR_variant=1;intron_variant=1079;feature_truncation=55;feature_elongation=67;synonymous_variant=51;missense_variant=19;frameshift_variant=2;splice_region_variant=9;5_prime_UTR_variant=1;upstream_gene_variant=2	downstream_gene_variant=9;intron_variant=56;nc_transcript_variant=58;feature_truncation=4;feature_elongation=3;non_coding_exon_variant=2;upstream_gene_variant=72	1	0	0	1	0	6.67	11.5	3.42	3.58	0.71	0.72	0.82	0.87	cons	CONS
protein_coding	Plekha1	ENSMUST00000120441	ENSMUST00000048180	protein_coding	protein_coding	TRUE	TRUE	5_prime_UTR_variant=1;intron_variant=553;feature_elongation=44;feature_truncation=41;synonymous_variant=3;3_prime_UTR_variant=15	upstream_gene_variant=1;intron_variant=553;feature_elongation=44;feature_truncation=41;synonymous_variant=3;3_prime_UTR_variant=15	0	0	1	1	1	12	8	2.67	0.58	0.6	0.5	0.5	0.67	cons	CIS&TRANS
protein_coding	Zfp653	ENSMUST00000179605	ENSMUST00000043922	protein_coding	protein_coding	TRUE	TRUE	3_prime_UTR_variant=1;intron_variant=137;feature_truncation=10;feature_elongation=10;synonymous_variant=5;upstream_gene_variant=14	3_prime_UTR_variant=1;intron_variant=137;feature_truncation=10;feature_elongation=10;synonymous_variant=5;upstream_gene_variant=14	0	0	0	0	1	18.17	8.5	5.58	0.67	0.41	0.53	0.41	0.4	NA	CIS&TRANS
protein_coding	9130019O22Rik	ENSMUST00000049052	ENSMUST00000164345	protein_coding	protein_coding	TRUE	TRUE	downstream_gene_variant=1;3_prime_UTR_variant=43;feature_elongation=4;feature_truncation=1;missense_variant=19;synonymous_variant=7;intron_variant=17;5_prime_UTR_variant=5;upstream_gene_variant=65	downstream_gene_variant=33;3_prime_UTR_variant=27;feature_elongation=2;feature_truncation=1;missense_variant=7;intron_variant=19;splice_donor_variant=1;5_prime_UTR_variant=5;upstream_gene_variant=64	0	0	1	1	1	2.33	6.83	2.92	1.67	0.5	0.42	0.36	0.63	NA	Not in Dataset
protein_coding	Braf	ENSMUST00000002487	ENSMUST00000101497	protein_coding	protein_coding	TRUE	TRUE	3_prime_UTR_variant=47;feature_truncation=108;feature_elongation=124;intron_variant=1280;synonymous_variant=7;splice_region_variant=2;missense_variant=1;upstream_gene_variant=4	downstream_gene_variant=45;synonymous_variant=6;intron_variant=1241;feature_elongation=113;feature_truncation=97;splice_region_variant=2;missense_variant=1;upstream_gene_variant=5	0	1	1	0	1	14.17	13.33	5.83	5.33	0.94	0.81	0.91	0.94	trans	CONS
protein_coding	Trhde	ENSMUST00000061632	ENSMUST00000152702	protein_coding	retained_intron	TRUE	NA	downstream_gene_variant=2;3_prime_UTR_variant=34;feature_elongation=367;feature_truncation=286;synonymous_variant=8;intron_variant=5013;splice_region_variant=1;missense_variant=1;upstream_gene_variant=3	downstream_gene_variant=74;non_coding_exon_variant=20;nc_transcript_variant=3028;feature_truncation=171;intron_variant=3008;feature_elongation=226	0	1	1	0	0	3.5	14	4.25	6.83	0.97	0.84	0.89	0.83	NA	CIS&TRANS
lincRNA	E230016M11Rik	ENSMUST00000130657	ENSMUST00000149889	processed_transcript	retained_intron	TRUE	NA	splice_region_variant=1;intron_variant=413;nc_transcript_variant=437;feature_truncation=35;feature_elongation=29;non_coding_exon_variant=24	splice_region_variant=1;intron_variant=406;nc_transcript_variant=429;feature_truncation=35;feature_elongation=29;non_coding_exon_variant=23;downstream_gene_variant=8	0	0	1	1	1	5.33	5	1.67	2.33	0.58	0.3	0.5	0.51	NA	Not in Dataset
protein_coding	Ptprs	ENSMUST00000086828	ENSMUST00000067538	protein_coding	protein_coding	TRUE	TRUE	3_prime_UTR_variant=11;feature_truncation=20;feature_elongation=8;intron_variant=286;synonymous_variant=17;upstream_gene_variant=33	3_prime_UTR_variant=11;feature_truncation=28;feature_elongation=16;intron_variant=377;synonymous_variant=19;upstream_gene_variant=1	1	0	0	1	1	4.33	11.67	2.67	5.92	0.59	0.7	0.65	0.37	cons	CONS
protein_coding	Ppp2r3a	ENSMUST00000075941	ENSMUST00000066773	protein_coding	protein_coding	TRUE	TRUE	3_prime_UTR_variant=20;feature_elongation=101;feature_truncation=96;intron_variant=1100;synonymous_variant=6;splice_region_variant=2;missense_variant=3;5_prime_UTR_variant=2;upstream_gene_variant=2	3_prime_UTR_variant=20;feature_elongation=64;feature_truncation=59;intron_variant=732;synonymous_variant=3;splice_region_variant=2;upstream_gene_variant=30	1	0	0	0	0	14	10.5	4.92	3.92	0.31	0.62	0.61	0.45	NA	CONS
protein_coding	Sec31b	ENSMUST00000063632	ENSMUST00000111985	protein_coding	protein_coding	TRUE	TRUE	downstream_gene_variant=4;3_prime_UTR_variant=5;feature_elongation=21;feature_truncation=25;synonymous_variant=13;intron_variant=401;missense_variant=12;splice_region_variant=3;5_prime_UTR_variant=2;upstream_gene_variant=1	downstream_gene_variant=8;3_prime_UTR_variant=1;synonymous_variant=11;intron_variant=402;missense_variant=10;feature_elongation=20;splice_region_variant=3;feature_truncation=24;5_prime_UTR_variant=5;upstream_gene_variant=1	0	0	1	1	1	21.5	13.83	4.58	9.58	0.93	0.81	0.72	0.68	NA	CONS
protein_coding	Map2k6	ENSMUST00000020949	ENSMUST00000133920	protein_coding	processed_transcript	TRUE	NA	intron_variant=1703;feature_elongation=135;feature_truncation=102;splice_region_variant=3;synonymous_variant=3;3_prime_UTR_variant=4;downstream_gene_variant=52	upstream_gene_variant=73;non_coding_exon_variant=4;nc_transcript_variant=345;intron_variant=341;feature_truncation=19;feature_elongation=20;splice_region_variant=2;downstream_gene_variant=90	1	1	0	0	0	11.5	14.83	1.58	1.08	0.86	0.86	0.6	0.47	cons	CONS
protein_coding	Fryl	ENSMUST00000101127	ENSMUST00000146953	protein_coding	processed_transcript	TRUE	NA	3_prime_UTR_variant=11;feature_elongation=213;feature_truncation=191;missense_variant=4;synonymous_variant=32;intron_variant=2816;splice_region_variant=8;5_prime_UTR_variant=3	downstream_gene_variant=7;non_coding_exon_variant=13;nc_transcript_variant=204;feature_truncation=12;intron_variant=191;feature_elongation=10;upstream_gene_variant=59	1	0	0	1	0	13.17	14.5	5.67	6.5	0.45	0.84	0.72	0.74	cons	CONS
protein_coding	Zbtb45	ENSMUST00000172240	ENSMUST00000051390	protein_coding	protein_coding	TRUE	FALSE	3_prime_UTR_variant=17;feature_elongation=2;feature_truncation=2;intron_variant=20;splice_region_variant=1;synonymous_variant=10;missense_variant=1	downstream_gene_variant=15;3_prime_UTR_variant=4;synonymous_variant=10;intron_variant=18;feature_truncation=1;missense_variant=1;feature_elongation=1	0	1	1	0	1	7	12	5.08	6.92	0.4	0.69	0.27	0.39	NA	CONS
protein_coding	Banp	ENSMUST00000093078	ENSMUST00000170857	protein_coding	protein_coding	TRUE	TRUE	upstream_gene_variant=4;5_prime_UTR_variant=2;intron_variant=739;feature_elongation=65;feature_truncation=55;synonymous_variant=2;missense_variant=2;3_prime_UTR_variant=1;downstream_gene_variant=27	upstream_gene_variant=5;intron_variant=739;feature_elongation=65;feature_truncation=55;5_prime_UTR_variant=1;synonymous_variant=2;missense_variant=2;3_prime_UTR_variant=28	0	0	1	1	1	9.83	13.33	3.08	5	0.73	0.74	0.59	0.37	cons	CONS
protein_coding	Pigw	ENSMUST00000067058	ENSMUST00000108080	protein_coding	protein_coding	TRUE	FALSE	downstream_gene_variant=2;3_prime_UTR_variant=10;feature_truncation=2;feature_elongation=4;missense_variant=1;synonymous_variant=4;intron_variant=9;upstream_gene_variant=1	downstream_gene_variant=11;3_prime_UTR_variant=1;missense_variant=1;synonymous_variant=4;intron_variant=9;feature_elongation=3;feature_truncation=1;upstream_gene_variant=1	1	0	0	1	0	9	10.5	2.08	5.42	0.79	0.58	0.63	0.73	CIS&TRANS	CONS
protein_coding	Gtpbp8	ENSMUST00000162512	ENSMUST00000023348	protein_coding	protein_coding	TRUE	TRUE	downstream_gene_variant=39;3_prime_UTR_variant=17;feature_elongation=3;feature_truncation=8;intron_variant=35;synonymous_variant=2;missense_variant=1	downstream_gene_variant=37;intron_variant=36;feature_truncation=7;feature_elongation=2;synonymous_variant=1;missense_variant=1	0	0	1	1	1	29.17	14.33	12.58	6.08	0.75	0.79	0.94	0.76	NA	CONS
protein_coding	Akap10	ENSMUST00000102650	ENSMUST00000137323	protein_coding	processed_transcript	TRUE	NA	downstream_gene_variant=25;3_prime_UTR_variant=14;feature_elongation=48;feature_truncation=45;intron_variant=402;synonymous_variant=2;missense_variant=1	downstream_gene_variant=21;non_coding_exon_variant=8;nc_transcript_variant=45;intron_variant=37;feature_elongation=7;feature_truncation=5;upstream_gene_variant=20	1	0	0	1	0	14.67	12.83	5.42	2.83	0.86	0.7	0.97	0.53	NA	CONS
protein_coding	Mdga2	ENSMUST00000178724	ENSMUST00000179577	retained_intron	processed_transcript	FALSE	NA	downstream_gene_variant=65;non_coding_exon_variant=90;nc_transcript_variant=90;feature_elongation=5;feature_truncation=6;upstream_gene_variant=79	downstream_gene_variant=86;non_coding_exon_variant=29;nc_transcript_variant=280;feature_elongation=35;intron_variant=251;feature_truncation=20;upstream_gene_variant=2	1	1	0	0	0	5.67	14.67	6	2.58	1	0.8	1	0.62	CIS&TRANS	Not in Dataset
protein_coding	Rcsd1	ENSMUST00000040357	ENSMUST00000097474	protein_coding	protein_coding	TRUE	TRUE	downstream_gene_variant=1;3_prime_UTR_variant=7;intron_variant=706;feature_elongation=63;feature_truncation=40;synonymous_variant=3;missense_variant=3;5_prime_UTR_variant=1	downstream_gene_variant=1;3_prime_UTR_variant=7;intron_variant=707;feature_elongation=63;feature_truncation=40;synonymous_variant=2;missense_variant=3;5_prime_UTR_variant=1	0	0	0	0	1	5.67	6.83	2.42	2.75	0.52	0.37	0.57	0.62	NA	CONS
protein_coding	Jarid2	ENSMUST00000173246	ENSMUST00000174683	protein_coding	retained_intron	TRUE	NA	upstream_gene_variant=2;5_prime_UTR_variant=1;feature_truncation=145;intron_variant=1367;feature_elongation=145;synonymous_variant=6;missense_variant=2;3_prime_UTR_variant=12	upstream_gene_variant=2;non_coding_exon_variant=38;nc_transcript_variant=1388;feature_truncation=145;intron_variant=1350;feature_elongation=145	0	0	1	1	1	13.5	16.83	7.58	9.33	1	0.91	0.93	0.86	NA	Not in Dataset
protein_coding	Baz1a	ENSMUST00000038926	ENSMUST00000173433	protein_coding	protein_coding	TRUE	TRUE	3_prime_UTR_variant=8;intron_variant=861;feature_truncation=85;feature_elongation=100;splice_region_variant=4;missense_variant=5;synonymous_variant=8;5_prime_UTR_variant=1;upstream_gene_variant=69	downstream_gene_variant=5;3_prime_UTR_variant=3;intron_variant=861;feature_truncation=85;feature_elongation=100;splice_region_variant=4;missense_variant=5;synonymous_variant=8;5_prime_UTR_variant=1;upstream_gene_variant=70	0	0	1	1	1	6.33	7.67	0.67	1.83	0.16	0.41	0.69	0.44	cons	CIS
lincRNA	AC130654.1	ENSMUST00000180789	ENSMUST00000181316	lincRNA	lincRNA	TRUE	NA	downstream_gene_variant=1;non_coding_exon_variant=17;nc_transcript_variant=25;feature_truncation=2;intron_variant=8;feature_elongation=1;upstream_gene_variant=10	downstream_gene_variant=13;non_coding_exon_variant=4;nc_transcript_variant=23;feature_truncation=4;splice_region_variant=1;intron_variant=19;feature_elongation=2	1	0	0	1	1	3.83	7.67	1.75	2.42	0.46	0.41	0.33	0.64	NA	CONS
protein_coding	Ccdc77	ENSMUST00000032283	ENSMUST00000137271	protein_coding	retained_intron	TRUE	NA	downstream_gene_variant=2;3_prime_UTR_variant=10;feature_elongation=26;feature_truncation=29;splice_region_variant=3;intron_variant=343;synonymous_variant=4;missense_variant=4;5_prime_UTR_variant=2;upstream_gene_variant=65	downstream_gene_variant=81;non_coding_exon_variant=20;nc_transcript_variant=34;feature_truncation=5;intron_variant=14;feature_elongation=2;upstream_gene_variant=18	1	1	0	0	0	6.17	7.5	2.33	3.92	0.49	0.4	0.89	0.06	NA	CONS
protein_coding	Frs3	ENSMUST00000113296	ENSMUST00000139405	protein_coding	processed_transcript	TRUE	NA	upstream_gene_variant=21;intron_variant=78;feature_truncation=5;5_prime_UTR_variant=1;feature_elongation=5;splice_region_variant=1;synonymous_variant=3;3_prime_UTR_variant=4;downstream_gene_variant=1	upstream_gene_variant=45;intron_variant=7;nc_transcript_variant=18;feature_elongation=2;non_coding_exon_variant=11;downstream_gene_variant=24	1	1	0	0	0	5	12.5	5.75	5.25	0.4	0.66	0.66	0.46	cons	CONS
protein_coding	Ccdc93	ENSMUST00000036025	ENSMUST00000152959	protein_coding	retained_intron	TRUE	NA	5_prime_UTR_variant=4;intron_variant=1000;feature_elongation=86;feature_truncation=65;synonymous_variant=6;missense_variant=2;splice_region_variant=2;3_prime_UTR_variant=56;downstream_gene_variant=1	upstream_gene_variant=114;intron_variant=59;nc_transcript_variant=83;feature_elongation=11;splice_region_variant=1;non_coding_exon_variant=24;feature_truncation=7;downstream_gene_variant=68	1	1	0	0	1	12.67	17.5	7.17	7.83	0.98	0.92	0.99	0.97	cons	CONS
protein_coding	Otud4	ENSMUST00000173078	ENSMUST00000173286	protein_coding	protein_coding	TRUE	TRUE	upstream_gene_variant=1;5_prime_UTR_variant=1;feature_elongation=29;intron_variant=180;feature_truncation=20;missense_variant=3;synonymous_variant=2;3_prime_UTR_variant=19;downstream_gene_variant=1	upstream_gene_variant=1;5_prime_UTR_variant=1;feature_elongation=29;intron_variant=180;feature_truncation=20;missense_variant=3;synonymous_variant=2;3_prime_UTR_variant=19;downstream_gene_variant=1	0	0	1	1	1	21.33	12	4.33	4.33	0.81	0.63	0.29	0.5	NA	CONS
protein_coding	Srd5a3	ENSMUST00000031143	ENSMUST00000124217	protein_coding	retained_intron	TRUE	NA	upstream_gene_variant=1;5_prime_UTR_variant=1;synonymous_variant=6;splice_region_variant=1;intron_variant=189;feature_elongation=7;feature_truncation=15;missense_variant=3;3_prime_UTR_variant=6;downstream_gene_variant=4	upstream_gene_variant=83;non_coding_exon_variant=20;nc_transcript_variant=43;feature_truncation=3;intron_variant=23;feature_elongation=1;downstream_gene_variant=3	1	0	0	1	0	34.83	15.67	14.42	2.17	0.96	0.82	0.77	0.6	NA	CIS
protein_coding	Dnmt1	ENSMUST00000004202	ENSMUST00000177754	protein_coding	protein_coding	TRUE	TRUE	3_prime_UTR_variant=2;feature_truncation=53;intron_variant=595;synonymous_variant=19;feature_elongation=49;splice_region_variant=3;missense_variant=6;upstream_gene_variant=34	3_prime_UTR_variant=2;feature_truncation=57;intron_variant=640;synonymous_variant=19;feature_elongation=51;splice_region_variant=3;missense_variant=5;5_prime_UTR_variant=2;upstream_gene_variant=1	1	0	0	0	1	10.5	16.83	2.33	3.42	0.54	0.88	0.67	0.44	NA	CONS
protein_coding	Rapgef2	ENSMUST00000118340	ENSMUST00000136126	protein_coding	processed_transcript	FALSE	NA	downstream_gene_variant=3;3_prime_UTR_variant=12;feature_truncation=62;intron_variant=743;feature_elongation=69;synonymous_variant=10;splice_region_variant=4;upstream_gene_variant=9	downstream_gene_variant=8;non_coding_exon_variant=7;nc_transcript_variant=19;intron_variant=12;feature_elongation=1;feature_truncation=2	1	1	0	0	0	1.5	3.83	0.5	1.83	0.32	0.2	0.27	0	NA	Not in Dataset
protein_coding	Pola2	ENSMUST00000025752	ENSMUST00000165143	protein_coding	protein_coding	TRUE	TRUE	downstream_gene_variant=1;3_prime_UTR_variant=6;synonymous_variant=9;intron_variant=266;splice_region_variant=2;feature_truncation=14;feature_elongation=17;missense_variant=2;upstream_gene_variant=2	downstream_gene_variant=8;3_prime_UTR_variant=4;stop_gained=1;intron_variant=261;synonymous_variant=8;splice_region_variant=2;feature_truncation=14;feature_elongation=17;missense_variant=2;upstream_gene_variant=2	0	1	0	0	0	24.83	17.5	11	10.25	0.7	0.9	0.72	0.91	cis	CONS
protein_coding	Scmh1	ENSMUST00000000087	ENSMUST00000136801	protein_coding	processed_transcript	TRUE	NA	intron_variant=561;feature_truncation=61;feature_elongation=61;missense_variant=1;3_prime_UTR_variant=3	upstream_gene_variant=14;intron_variant=50;nc_transcript_variant=53;feature_truncation=4;feature_elongation=2;non_coding_exon_variant=3	1	0	0	0	0	15.83	19.5	5.33	1.5	0.73	1	0.57	0.43	CIS&TRANS	CIS
protein_coding	Cxcl16	ENSMUST00000019064	ENSMUST00000126391	protein_coding	nonsense_mediated_decay	TRUE	TRUE	downstream_gene_variant=7;3_prime_UTR_variant=9;feature_elongation=5;intron_variant=11;synonymous_variant=3;missense_variant=1;feature_truncation=1;5_prime_UTR_variant=2	downstream_gene_variant=11;3_prime_UTR_variant=3;NMD_transcript_variant=20;feature_elongation=5;intron_variant=13;synonymous_variant=3;missense_variant=1;feature_truncation=1;upstream_gene_variant=2	0	0	1	1	1	19.5	11.17	10.17	4.42	0.51	0.57	0.61	0.8	CIS&TRANS	CIS
protein_coding	B230120H23Rik	ENSMUST00000090824	ENSMUST00000135469	protein_coding	protein_coding	TRUE	TRUE	upstream_gene_variant=1;5_prime_UTR_variant=1;intron_variant=1498;feature_elongation=128;feature_truncation=92;synonymous_variant=5;splice_region_variant=3;missense_variant=2;3_prime_UTR_variant=8	upstream_gene_variant=1;5_prime_UTR_variant=1;intron_variant=1109;feature_elongation=93;feature_truncation=66;synonymous_variant=1;splice_region_variant=1;3_prime_UTR_variant=45;downstream_gene_variant=33	0	1	1	0	0	18.33	10	7.17	8.42	0.54	0.51	0.51	0.68	cons	CONS
protein_coding	Heg1	ENSMUST00000152782	ENSMUST00000154863	protein_coding	retained_intron	TRUE	NA	inframe_deletion=1;synonymous_variant=15;missense_variant=21;intron_variant=985;feature_elongation=90;feature_truncation=68;splice_region_variant=2;3_prime_UTR_variant=54	non_coding_exon_variant=55;nc_transcript_variant=547;feature_truncation=30;intron_variant=492;feature_elongation=44;downstream_gene_variant=72	0	1	0	0	1	12.5	17.17	6	7.42	0.96	0.87	0.95	0.97	cons	CONS
protein_coding	Gramd4	ENSMUST00000088931	ENSMUST00000123349	protein_coding	nonsense_mediated_decay	TRUE	TRUE	frameshift_variant=2;feature_elongation=43;inframe_insertion=1;missense_variant=1;intron_variant=572;feature_truncation=42;synonymous_variant=4;splice_region_variant=2;3_prime_UTR_variant=18;downstream_gene_variant=38	upstream_gene_variant=9;intron_variant=563;NMD_transcript_variant=589;feature_elongation=41;feature_truncation=42;synonymous_variant=3;splice_region_variant=2;3_prime_UTR_variant=23;downstream_gene_variant=38	1	0	0	1	1	14.67	17.67	2.33	7.25	0.91	0.89	0.8	0.94	cons	CIS
protein_coding	Arid2	ENSMUST00000096250	ENSMUST00000176739	protein_coding	retained_intron	TRUE	NA	upstream_gene_variant=2;intron_variant=748;feature_elongation=70;synonymous_variant=16;feature_truncation=57;missense_variant=8;splice_region_variant=1;3_prime_UTR_variant=6;downstream_gene_variant=1	upstream_gene_variant=31;intron_variant=207;nc_transcript_variant=219;feature_truncation=26;feature_elongation=22;non_coding_exon_variant=12;splice_region_variant=1;downstream_gene_variant=4	1	0	0	1	1	14.17	18.83	7.5	7.75	0.68	0.94	0.84	0.88	trans	CONS
protein_coding	Fkbp14	ENSMUST00000046520	ENSMUST00000155047	protein_coding	nonsense_mediated_decay	TRUE	TRUE	downstream_gene_variant=2;3_prime_UTR_variant=32;feature_truncation=10;intron_variant=130;feature_elongation=11;synonymous_variant=4;5_prime_UTR_variant=1;upstream_gene_variant=59	downstream_gene_variant=2;3_prime_UTR_variant=33;NMD_transcript_variant=167;feature_truncation=10;intron_variant=130;feature_elongation=11;synonymous_variant=3;5_prime_UTR_variant=1;upstream_gene_variant=59	0	0	1	1	1	14.5	17.83	3.25	4.42	0.33	0.89	0.62	0.8	NA	CONS
protein_coding	1810024B03Rik	ENSMUST00000056146	ENSMUST00000150956	protein_coding	processed_transcript	TRUE	NA	downstream_gene_variant=1;missense_variant=5;synonymous_variant=1;5_prime_UTR_variant=3;intron_variant=102;feature_truncation=7;feature_elongation=12	downstream_gene_variant=26;non_coding_exon_variant=10;nc_transcript_variant=22;feature_elongation=3;intron_variant=12;feature_truncation=2	0	1	1	0	0	10	3.83	4	3.08	0.09	0.19	0.08	0.02	NA	CONS
protein_coding	Rad54b	ENSMUST00000070755	ENSMUST00000144499	protein_coding	retained_intron	TRUE	NA	intron_variant=654;feature_truncation=52;feature_elongation=45;synonymous_variant=7;missense_variant=3;splice_region_variant=1;3_prime_UTR_variant=1;downstream_gene_variant=3	upstream_gene_variant=64;intron_variant=13;nc_transcript_variant=18;non_coding_exon_variant=5;feature_elongation=1;downstream_gene_variant=75	1	1	0	0	0	0.83	15.33	0.08	7.17	1	0.76	1	0.87	CIS&TRANS	CIS
protein_coding	Zfp87	ENSMUST00000181767	ENSMUST00000181573	protein_coding	protein_coding	TRUE	TRUE	downstream_gene_variant=2;3_prime_UTR_variant=12;feature_elongation=3;synonymous_variant=6;intron_variant=107;feature_truncation=7	downstream_gene_variant=59;3_prime_UTR_variant=3;intron_variant=57;feature_elongation=2;feature_truncation=4	0	1	0	0	0	35.67	11.33	11	10.08	0.24	0.56	0.6	0.56	NA	CONS
protein_coding	Elf1	ENSMUST00000040131	ENSMUST00000110835	protein_coding	protein_coding	TRUE	FALSE	upstream_gene_variant=1;5_prime_UTR_variant=3;intron_variant=1053;feature_truncation=78;feature_elongation=81;synonymous_variant=9;missense_variant=3;3_prime_UTR_variant=7	upstream_gene_variant=49;intron_variant=677;feature_elongation=53;feature_truncation=53;5_prime_UTR_variant=1;synonymous_variant=9;missense_variant=3;3_prime_UTR_variant=7	1	0	0	1	0	14.5	12.17	4	5.25	0.54	0.6	0.51	0.47	cons	CONS
protein_coding	Znrf3	ENSMUST00000109867	ENSMUST00000172492	protein_coding	protein_coding	TRUE	TRUE	downstream_gene_variant=1;3_prime_UTR_variant=11;feature_truncation=87;feature_elongation=122;intron_variant=950;synonymous_variant=5;missense_variant=2;upstream_gene_variant=1	downstream_gene_variant=10;3_prime_UTR_variant=9;feature_elongation=68;feature_truncation=52;synonymous_variant=5;missense_variant=2;intron_variant=564;upstream_gene_variant=28	1	0	0	1	1	10.33	13	6.5	5.33	0.69	0.64	0.8	0.71	cons	Not in Dataset
protein_coding	H2-DMb1	ENSMUST00000114232	ENSMUST00000174765	protein_coding	processed_transcript	TRUE	NA	upstream_gene_variant=3;5_prime_UTR_variant=7;missense_variant=8;intron_variant=90;feature_elongation=3;synonymous_variant=5;feature_truncation=5;splice_region_variant=1;3_prime_UTR_variant=3;downstream_gene_variant=1	upstream_gene_variant=78;intron_variant=30;nc_transcript_variant=38;splice_region_variant=1;non_coding_exon_variant=8;feature_truncation=2;feature_elongation=2;downstream_gene_variant=1	1	0	0	1	0	13.83	15.67	10.83	7.92	0.89	0.77	0.88	0.78	NA	CONS
protein_coding	Zfp943	ENSMUST00000055349	ENSMUST00000153985	protein_coding	protein_coding	TRUE	TRUE	upstream_gene_variant=10;intron_variant=200;feature_elongation=15;feature_truncation=15;5_prime_UTR_variant=1;missense_variant=4;synonymous_variant=2;3_prime_UTR_variant=2;downstream_gene_variant=30	upstream_gene_variant=10;intron_variant=192;feature_elongation=15;feature_truncation=15;5_prime_UTR_variant=1;missense_variant=1;3_prime_UTR_variant=8;downstream_gene_variant=24	0	1	1	0	0	28.67	18.5	11.33	14.67	0.91	0.9	0.94	0.94	cons	Not in Dataset
protein_coding	Catsper2	ENSMUST00000154604	ENSMUST00000038073	nonsense_mediated_decay	protein_coding	TRUE	TRUE	3_prime_UTR_variant=7;NMD_transcript_variant=116;intron_variant=107;feature_elongation=31;feature_truncation=14;splice_region_variant=3;missense_variant=1;5_prime_UTR_variant=1	downstream_gene_variant=6;intron_variant=102;feature_truncation=13;feature_elongation=26;missense_variant=2;inframe_insertion=3;synonymous_variant=1;inframe_deletion=1;splice_region_variant=3;5_prime_UTR_variant=1	0	1	1	0	1	9.17	14.83	1.42	2.42	0.82	0.72	0.29	0.4	cons	CIS
protein_coding	Islr	ENSMUST00000041477	ENSMUST00000168864	protein_coding	protein_coding	TRUE	FALSE	synonymous_variant=1;missense_variant=2;5_prime_UTR_variant=1;upstream_gene_variant=2	synonymous_variant=1;missense_variant=2;upstream_gene_variant=3	1	0	0	0	0	12.33	8	1.17	3.25	0.78	0.38	0.6	0.43	cis	CONS
protein_coding	Nod1	ENSMUST00000060655	ENSMUST00000168172	protein_coding	protein_coding	TRUE	FALSE	downstream_gene_variant=1;3_prime_UTR_variant=27;feature_truncation=25;splice_region_variant=1;intron_variant=492;feature_elongation=34;missense_variant=4;synonymous_variant=5;5_prime_UTR_variant=4;upstream_gene_variant=1	downstream_gene_variant=1;3_prime_UTR_variant=27;feature_truncation=24;splice_region_variant=1;intron_variant=489;feature_elongation=34;missense_variant=4;synonymous_variant=5;upstream_gene_variant=8	1	0	0	0	0	14.17	13.17	9.08	5.25	0.6	0.62	0.74	0.5	NA	CONS
protein_coding	Trim65	ENSMUST00000106440	ENSMUST00000067632	protein_coding	protein_coding	TRUE	TRUE	downstream_gene_variant=38;3_prime_UTR_variant=12;feature_elongation=2;feature_truncation=3;splice_region_variant=1;intron_variant=60;missense_variant=2;synonymous_variant=5;5_prime_UTR_variant=4;upstream_gene_variant=1	downstream_gene_variant=33;3_prime_UTR_variant=9;missense_variant=3;synonymous_variant=6;intron_variant=48;feature_truncation=2;5_prime_UTR_variant=4;upstream_gene_variant=1	0	1	1	0	0	23	16.17	12.75	9.58	0.81	0.76	0.93	0.81	cons	CONS
protein_coding	Col6a2	ENSMUST00000001181	ENSMUST00000105413	protein_coding	protein_coding	TRUE	TRUE	downstream_gene_variant=2;synonymous_variant=10;intron_variant=341;feature_elongation=22;feature_truncation=18;missense_variant=1;splice_region_variant=1;5_prime_UTR_variant=4;upstream_gene_variant=3	downstream_gene_variant=15;3_prime_UTR_variant=31;feature_elongation=20;synonymous_variant=9;intron_variant=298;feature_truncation=18;missense_variant=1;splice_region_variant=1;upstream_gene_variant=7	0	1	1	0	0	8.83	20	4.67	7.42	0.77	0.93	0.81	0.93	NA	CONS
protein_coding	Il17rb	ENSMUST00000016110	ENSMUST00000136726	protein_coding	nonsense_mediated_decay	TRUE	TRUE	3_prime_UTR_variant=5;feature_truncation=6;missense_variant=3;intron_variant=101;feature_elongation=8;splice_region_variant=1;synonymous_variant=4;upstream_gene_variant=56	3_prime_UTR_variant=14;NMD_transcript_variant=113;feature_truncation=6;intron_variant=94;feature_elongation=8;splice_region_variant=1;missense_variant=2;synonymous_variant=3;upstream_gene_variant=55	0	0	1	1	1	32.5	17	5.17	4.83	0.94	0.79	0.7	0.52	trans	CONS
protein_coding	Foxj2	ENSMUST00000003238	ENSMUST00000177927	protein_coding	protein_coding	TRUE	FALSE	5_prime_UTR_variant=9;feature_truncation=21;intron_variant=253;feature_elongation=22;missense_variant=3;synonymous_variant=7;stop_gained=1;3_prime_UTR_variant=6;downstream_gene_variant=1	upstream_gene_variant=7;5_prime_UTR_variant=2;feature_truncation=21;intron_variant=253;feature_elongation=22;missense_variant=3;synonymous_variant=7;stop_gained=1;3_prime_UTR_variant=6;downstream_gene_variant=1	0	0	1	1	1	11.83	11.33	6.33	6.08	0.49	0.52	0.63	0.74	cons	CONS
protein_coding	Klhl12	ENSMUST00000027725	ENSMUST00000141458	protein_coding	processed_transcript	TRUE	NA	5_prime_UTR_variant=3;intron_variant=369;feature_elongation=34;feature_truncation=25;synonymous_variant=3;3_prime_UTR_variant=9	upstream_gene_variant=67;non_coding_exon_variant=7;nc_transcript_variant=130;feature_elongation=7;intron_variant=123;feature_truncation=10;downstream_gene_variant=54	1	1	0	0	0	23.17	14.83	4.67	5.25	0.9	0.68	0.71	0.84	cons	CIS
protein_coding	Sesn1	ENSMUST00000099931	ENSMUST00000041438	protein_coding	protein_coding	TRUE	TRUE	upstream_gene_variant=43;5_prime_UTR_variant=6;feature_truncation=64;feature_elongation=81;intron_variant=810;synonymous_variant=4;splice_region_variant=2;3_prime_UTR_variant=9	upstream_gene_variant=41;synonymous_variant=5;missense_variant=1;intron_variant=211;feature_elongation=21;feature_truncation=16;splice_region_variant=2;3_prime_UTR_variant=9	1	0	0	0	0	37	12	13.67	4.58	0.13	0.55	0.34	0.44	cis	CIS&TRANS
protein_coding	Ttc9c	ENSMUST00000096751	ENSMUST00000088092	protein_coding	protein_coding	TRUE	FALSE	3_prime_UTR_variant=21;feature_truncation=9;feature_elongation=10;intron_variant=56;missense_variant=2;synonymous_variant=1;5_prime_UTR_variant=1	downstream_gene_variant=18;3_prime_UTR_variant=3;feature_elongation=7;intron_variant=55;feature_truncation=7;missense_variant=2;synonymous_variant=1;5_prime_UTR_variant=2	0	0	1	1	1	40.67	18.83	15	9.17	0.87	0.86	0.91	0.9	cons	CIS
protein_coding	Zc3h10	ENSMUST00000040572	ENSMUST00000152539	protein_coding	processed_transcript	TRUE	NA	downstream_gene_variant=1;3_prime_UTR_variant=15;feature_elongation=4;synonymous_variant=5;missense_variant=2;splice_region_variant=1;intron_variant=17	downstream_gene_variant=20;non_coding_exon_variant=9;nc_transcript_variant=20;splice_region_variant=1;intron_variant=11;feature_elongation=2	1	0	0	1	0	15.33	16	9.58	10.33	0.77	0.73	0.82	0.77	cons	CONS
protein_coding	Cep68	ENSMUST00000050611	ENSMUST00000162811	protein_coding	protein_coding	TRUE	TRUE	downstream_gene_variant=36;3_prime_UTR_variant=37;feature_elongation=28;feature_truncation=21;intron_variant=186;missense_variant=9;synonymous_variant=10;5_prime_UTR_variant=1;upstream_gene_variant=1	downstream_gene_variant=25;3_prime_UTR_variant=3;feature_elongation=12;missense_variant=8;synonymous_variant=10;intron_variant=87;feature_truncation=7;5_prime_UTR_variant=1;upstream_gene_variant=1	0	1	1	0	0	10.33	11.67	6.42	6.67	0.8	0.53	0.93	0.55	cis	CIS
protein_coding	Arhgap18	ENSMUST00000039557	ENSMUST00000142284	protein_coding	processed_transcript	TRUE	NA	upstream_gene_variant=88;5_prime_UTR_variant=1;missense_variant=4;intron_variant=1918;feature_elongation=113;feature_truncation=121;splice_region_variant=3;synonymous_variant=6;3_prime_UTR_variant=13	upstream_gene_variant=79;non_coding_exon_variant=21;nc_transcript_variant=574;intron_variant=553;feature_truncation=39;feature_elongation=37;splice_region_variant=1;downstream_gene_variant=1	1	0	0	1	0	21.17	21.83	6.67	13.42	0.83	0.99	0.78	0.86	NA	CIS&TRANS
protein_coding	Macrod2	ENSMUST00000124403	ENSMUST00000110061	processed_transcript	protein_coding	TRUE	NA	intron_variant=173;nc_transcript_variant=178;feature_elongation=19;feature_truncation=18;non_coding_exon_variant=5;downstream_gene_variant=47	intron_variant=173;feature_elongation=19;feature_truncation=18;3_prime_UTR_variant=5;downstream_gene_variant=47	0	0	1	0	1	23.67	15.67	3.25	8.42	0.93	0.71	0.44	0.82	NA	CONS
protein_coding	Cep164	ENSMUST00000117194	ENSMUST00000132430	protein_coding	protein_coding	TRUE	TRUE	downstream_gene_variant=5;3_prime_UTR_variant=12;feature_elongation=51;intron_variant=618;synonymous_variant=15;feature_truncation=35;missense_variant=12;splice_region_variant=3;inframe_deletion=1	downstream_gene_variant=66;intron_variant=250;missense_variant=9;synonymous_variant=11;feature_elongation=23;inframe_insertion=1;feature_truncation=10;splice_region_variant=1;inframe_deletion=1;upstream_gene_variant=17	1	1	0	0	1	23.5	19.83	11.25	9.17	0.82	0.88	0.82	0.83	cons	CONS
protein_coding	Lacc1	ENSMUST00000062789	ENSMUST00000139809	protein_coding	retained_intron	TRUE	NA	3_prime_UTR_variant=12;feature_elongation=18;feature_truncation=12;intron_variant=130;missense_variant=3;synonymous_variant=5;splice_region_variant=2;5_prime_UTR_variant=6;upstream_gene_variant=4	downstream_gene_variant=80;non_coding_exon_variant=24;nc_transcript_variant=40;feature_truncation=2;splice_region_variant=1;intron_variant=16	0	1	1	0	0	40	22.17	15.33	10.58	0.96	0.98	0.89	0.88	cons	Not in Dataset
protein_coding	Proser1	ENSMUST00000058577	ENSMUST00000141418	protein_coding	retained_intron	TRUE	NA	upstream_gene_variant=5;5_prime_UTR_variant=5;feature_truncation=15;intron_variant=202;feature_elongation=13;synonymous_variant=11;missense_variant=2;3_prime_UTR_variant=3	upstream_gene_variant=10;intron_variant=148;nc_transcript_variant=161;feature_truncation=11;feature_elongation=12;non_coding_exon_variant=13;downstream_gene_variant=37	0	1	1	0	0	23.33	21.5	12.25	11.42	1	0.95	0.96	0.96	NA	Not in Dataset
protein_coding	Smchd1	ENSMUST00000138193	ENSMUST00000127430	processed_transcript	protein_coding	TRUE	NA	non_coding_exon_variant=4;nc_transcript_variant=145;feature_truncation=10;intron_variant=141;feature_elongation=8;upstream_gene_variant=54	3_prime_UTR_variant=4;feature_truncation=109;intron_variant=1420;feature_elongation=129;splice_region_variant=6;synonymous_variant=7	1	0	0	0	0	17.67	11.33	3.33	5	0.76	0.5	0.45	0.46	cons	CONS
lincRNA	AC107744.1	ENSMUST00000181873	ENSMUST00000180779	lincRNA	lincRNA	TRUE	NA	downstream_gene_variant=2;non_coding_exon_variant=9;nc_transcript_variant=81;feature_elongation=8;splice_region_variant=1;intron_variant=72;feature_truncation=7;upstream_gene_variant=10	downstream_gene_variant=23;non_coding_exon_variant=18;nc_transcript_variant=60;feature_truncation=4;intron_variant=42;feature_elongation=7;upstream_gene_variant=10	0	1	1	0	0	65.67	15	39.42	13.42	0.96	0.66	0.86	0.81	trans	CIS
protein_coding	Dnajb14	ENSMUST00000090178	ENSMUST00000125226	protein_coding	retained_intron	TRUE	NA	intron_variant=570;feature_truncation=48;feature_elongation=45;synonymous_variant=3;3_prime_UTR_variant=94;downstream_gene_variant=1	intron_variant=326;nc_transcript_variant=405;feature_truncation=28;feature_elongation=25;non_coding_exon_variant=79;downstream_gene_variant=68	0	1	1	0	0	22	22.17	12.92	10.17	0.99	0.97	1	0.96	cons	CONS
protein_coding	Tbc1d22b	ENSMUST00000048677	ENSMUST00000160114	protein_coding	retained_intron	TRUE	NA	upstream_gene_variant=1;5_prime_UTR_variant=1;synonymous_variant=9;intron_variant=615;feature_elongation=51;feature_truncation=39;splice_region_variant=1;3_prime_UTR_variant=30;downstream_gene_variant=57	upstream_gene_variant=40;non_coding_exon_variant=34;nc_transcript_variant=444;splice_region_variant=1;intron_variant=410;feature_truncation=25;feature_elongation=28;downstream_gene_variant=57	1	0	0	1	0	14.17	17.17	4	8.92	0.86	0.75	0.58	0.88	CIS&TRANS	CIS
protein_coding	Fkbp7	ENSMUST00000002809	ENSMUST00000176815	protein_coding	nonsense_mediated_decay	TRUE	TRUE	downstream_gene_variant=1;3_prime_UTR_variant=3;feature_truncation=15;intron_variant=126;feature_elongation=13;splice_region_variant=2;synonymous_variant=5;missense_variant=1;upstream_gene_variant=42	downstream_gene_variant=20;intron_variant=110;NMD_transcript_variant=116;feature_truncation=12;feature_elongation=11;splice_region_variant=2;synonymous_variant=5;missense_variant=1;upstream_gene_variant=42	0	1	1	0	1	21.83	17.83	15.42	9.42	0.85	0.77	0.75	1	cons	CONS
protein_coding	Gxylt1	ENSMUST00000049484	ENSMUST00000057896	protein_coding	protein_coding	TRUE	TRUE	downstream_gene_variant=6;3_prime_UTR_variant=35;feature_truncation=14;intron_variant=205;feature_elongation=27;synonymous_variant=1;5_prime_UTR_variant=2	downstream_gene_variant=41;intron_variant=203;feature_truncation=13;feature_elongation=27;synonymous_variant=1;missense_variant=2;5_prime_UTR_variant=2	0	0	1	1	1	15.33	20.17	8.92	8.17	0.95	0.87	0.98	0.97	NA	Not in Dataset
protein_coding	Arhgef15	ENSMUST00000108671	ENSMUST00000108670	protein_coding	retained_intron	TRUE	NA	downstream_gene_variant=1;3_prime_UTR_variant=8;feature_truncation=16;feature_elongation=20;intron_variant=108;synonymous_variant=14;splice_region_variant=1;missense_variant=3;5_prime_UTR_variant=1	downstream_gene_variant=30;non_coding_exon_variant=42;nc_transcript_variant=56;feature_elongation=8;feature_truncation=5;intron_variant=14;upstream_gene_variant=47	1	1	0	0	0	18.67	15.33	3.67	3.92	0.89	0.66	0.51	0.32	cis	CONS
protein_coding	Pspc1	ENSMUST00000022507	ENSMUST00000163924	protein_coding	protein_coding	TRUE	TRUE	3_prime_UTR_variant=7;feature_truncation=36;intron_variant=326;feature_elongation=41	downstream_gene_variant=8;3_prime_UTR_variant=5;intron_variant=320;feature_truncation=35;feature_elongation=41	0	1	0	0	0	21.67	21.67	5	14.33	0.97	0.93	0.71	0.98	cons	Not in Dataset
protein_coding	Helb	ENSMUST00000020449	ENSMUST00000148241	protein_coding	retained_intron	TRUE	NA	3_prime_UTR_variant=17;feature_elongation=34;feature_truncation=27;synonymous_variant=13;missense_variant=10;intron_variant=365;splice_region_variant=1;inframe_deletion=1;5_prime_UTR_variant=2;upstream_gene_variant=4	downstream_gene_variant=17;non_coding_exon_variant=11;nc_transcript_variant=89;intron_variant=78;feature_truncation=9;feature_elongation=9;upstream_gene_variant=65	1	0	0	1	0	16	18.67	11.5	8.42	0.57	0.8	0.8	0.73	NA	CONS
protein_coding	Rrm2b	ENSMUST00000022901	ENSMUST00000127362	protein_coding	retained_intron	TRUE	NA	3_prime_UTR_variant=16;feature_elongation=25;feature_truncation=21;intron_variant=223;synonymous_variant=1;upstream_gene_variant=11	downstream_gene_variant=52;intron_variant=54;nc_transcript_variant=68;feature_truncation=7;feature_elongation=12;non_coding_exon_variant=14;upstream_gene_variant=21	1	1	0	0	0	8	8.17	20.17	4.42	0.36	0.35	0.13	0.34	cons	CONS
protein_coding	8430406I07Rik	ENSMUST00000110028	ENSMUST00000028910	protein_coding	protein_coding	TRUE	FALSE	5_prime_UTR_variant=1;intron_variant=6;feature_elongation=2;synonymous_variant=1;3_prime_UTR_variant=8;feature_truncation=3;downstream_gene_variant=2	5_prime_UTR_variant=1;intron_variant=6;feature_elongation=2;synonymous_variant=1;3_prime_UTR_variant=10;feature_truncation=3	0	0	1	1	1	11.83	16.33	1.83	4.83	0.53	0.69	0.45	0.74	cons	CONS
protein_coding	Abi3	ENSMUST00000059026	ENSMUST00000131049	protein_coding	processed_transcript	TRUE	NA	downstream_gene_variant=39;3_prime_UTR_variant=16;feature_elongation=10;intron_variant=73;synonymous_variant=4;splice_region_variant=1;feature_truncation=5;5_prime_UTR_variant=4	downstream_gene_variant=33;non_coding_exon_variant=9;nc_transcript_variant=86;intron_variant=77;feature_elongation=8;splice_region_variant=1;feature_truncation=5	1	0	0	1	0	12.67	22.5	12	13.08	0.18	0.95	0.79	0.8	trans	CONS
protein_coding	Nup37	ENSMUST00000052355	ENSMUST00000169309	protein_coding	protein_coding	TRUE	FALSE	upstream_gene_variant=1;intron_variant=273;feature_truncation=29;5_prime_UTR_variant=2;feature_elongation=24;synonymous_variant=1;downstream_gene_variant=4	upstream_gene_variant=1;intron_variant=273;feature_truncation=29;5_prime_UTR_variant=2;feature_elongation=24;synonymous_variant=1;downstream_gene_variant=4	0	0	1	0	1	18.33	17.17	5.17	8.25	0.6	0.71	0.56	0.58	NA	CONS
protein_coding	3830406C13Rik	ENSMUST00000163392	ENSMUST00000112669	protein_coding	protein_coding	TRUE	TRUE	upstream_gene_variant=4;intron_variant=99;feature_elongation=15;feature_truncation=7;missense_variant=1;3_prime_UTR_variant=9	upstream_gene_variant=4;intron_variant=99;feature_elongation=15;feature_truncation=7;3_prime_UTR_variant=10	0	0	0	0	1	46	17	7	4.75	0.91	0.7	0.89	0.64	NA	CONS
protein_coding	Zfp606	ENSMUST00000098822	ENSMUST00000123589	protein_coding	retained_intron	TRUE	NA	upstream_gene_variant=1;5_prime_UTR_variant=2;intron_variant=185;feature_truncation=12;feature_elongation=8;missense_variant=2;synonymous_variant=9;3_prime_UTR_variant=33;downstream_gene_variant=1	upstream_gene_variant=1;non_coding_exon_variant=38;nc_transcript_variant=70;intron_variant=32;feature_truncation=4;feature_elongation=1;downstream_gene_variant=53	0	1	1	0	0	4.83	5.83	2.42	3.42	0.53	0.24	0.58	0.07	cons	CONS
protein_coding	Tjap1	ENSMUST00000164342	ENSMUST00000180283	protein_coding	protein_coding	TRUE	FALSE	downstream_gene_variant=1;3_prime_UTR_variant=7;feature_elongation=24;synonymous_variant=6;missense_variant=4;intron_variant=225;feature_truncation=20;splice_region_variant=1;5_prime_UTR_variant=2	downstream_gene_variant=1;3_prime_UTR_variant=7;feature_elongation=24;synonymous_variant=6;missense_variant=4;intron_variant=226;feature_truncation=20;splice_region_variant=1;5_prime_UTR_variant=1	0	0	0	0	1	12	11.67	4.67	3.58	0.58	0.48	0.72	0.61	cons	CONS
protein_coding	Nfxl1	ENSMUST00000087216	ENSMUST00000149393	protein_coding	retained_intron	TRUE	NA	3_prime_UTR_variant=4;feature_truncation=24;intron_variant=259;feature_elongation=17;synonymous_variant=4;splice_region_variant=1;5_prime_UTR_variant=2	downstream_gene_variant=1;non_coding_exon_variant=8;nc_transcript_variant=29;intron_variant=21;feature_truncation=2;upstream_gene_variant=31	1	0	0	1	0	15.83	16.83	4.5	5	0.43	0.69	0.74	0.75	cons	CONS
protein_coding	Cyb561	ENSMUST00000019734	ENSMUST00000150563	protein_coding	processed_transcript	TRUE	NA	3_prime_UTR_variant=12;intron_variant=105;feature_elongation=6;feature_truncation=6;splice_region_variant=5;5_prime_UTR_variant=2;upstream_gene_variant=34	downstream_gene_variant=17;intron_variant=97;nc_transcript_variant=103;feature_truncation=6;splice_region_variant=5;feature_elongation=4;non_coding_exon_variant=6;upstream_gene_variant=33	0	1	1	0	1	21.83	21.33	13.42	5	0.97	0.87	0.96	0.8	cons	CIS&TRANS
protein_coding	Ucp2	ENSMUST00000126534	ENSMUST00000126381	protein_coding	retained_intron	TRUE	NA	upstream_gene_variant=2;5_prime_UTR_variant=3;intron_variant=43;feature_elongation=5;synonymous_variant=4;feature_truncation=3;missense_variant=1;3_prime_UTR_variant=26	upstream_gene_variant=3;non_coding_exon_variant=17;nc_transcript_variant=22;intron_variant=5;feature_elongation=1;downstream_gene_variant=54	0	1	1	0	0	69.17	23	17.83	17.5	0.98	0.93	0.98	0.95	cons	Not in Dataset
protein_coding	Nmt2	ENSMUST00000081932	ENSMUST00000155761	protein_coding	processed_transcript	TRUE	NA	intron_variant=353;feature_truncation=34;feature_elongation=39;synonymous_variant=4;splice_region_variant=1;3_prime_UTR_variant=8	intron_variant=169;nc_transcript_variant=180;feature_truncation=20;feature_elongation=22;non_coding_exon_variant=11;downstream_gene_variant=45	0	1	1	0	0	34.33	24	17.58	11.08	0.99	0.97	0.96	0.98	trans	CONS
protein_coding	Gimap9	ENSMUST00000054050	ENSMUST00000147936	protein_coding	protein_coding	TRUE	TRUE	upstream_gene_variant=1;5_prime_UTR_variant=2;intron_variant=5;missense_variant=4;frameshift_variant=1;feature_elongation=1;3_prime_UTR_variant=2;downstream_gene_variant=9	upstream_gene_variant=8;intron_variant=14;feature_elongation=2;feature_truncation=2;3_prime_UTR_variant=1;downstream_gene_variant=1	1	1	0	0	0	45	21.33	18.92	14.42	0.72	0.86	0.85	0.93	NA	CONS
protein_coding	Rnaseh2b	ENSMUST00000022499	ENSMUST00000156608	protein_coding	retained_intron	TRUE	NA	upstream_gene_variant=49;intron_variant=545;feature_elongation=34;feature_truncation=34;missense_variant=4;splice_region_variant=2;synonymous_variant=5;3_prime_UTR_variant=4;downstream_gene_variant=1	upstream_gene_variant=71;non_coding_exon_variant=46;nc_transcript_variant=82;feature_elongation=3;feature_truncation=3;intron_variant=36;downstream_gene_variant=34	1	1	0	0	0	23.83	23.17	14.33	23.83	1	0.93	0.98	0.95	cis	CONS
protein_coding	Rfc3	ENSMUST00000038131	ENSMUST00000145106	protein_coding	retained_intron	TRUE	NA	downstream_gene_variant=1;3_prime_UTR_variant=1;splice_region_variant=3;intron_variant=77;feature_elongation=6;synonymous_variant=3;feature_truncation=3;5_prime_UTR_variant=2;upstream_gene_variant=1	downstream_gene_variant=1;non_coding_exon_variant=23;nc_transcript_variant=83;feature_elongation=6;feature_truncation=3;intron_variant=60;splice_region_variant=2;upstream_gene_variant=1	0	0	1	1	1	47.67	23	17.58	8.67	0.99	0.92	0.87	0.95	cons	CONS
protein_coding	Myst4	ENSMUST00000069648	ENSMUST00000096222	protein_coding	protein_coding	TRUE	TRUE	intron_variant=1574;feature_elongation=126;feature_truncation=127;5_prime_UTR_variant=1;synonymous_variant=12;splice_region_variant=1;missense_variant=9;inframe_deletion=2;inframe_insertion=1;3_prime_UTR_variant=3;downstream_gene_variant=1	upstream_gene_variant=4;intron_variant=1075;feature_truncation=90;feature_elongation=90;5_prime_UTR_variant=1;synonymous_variant=1;splice_region_variant=1;3_prime_UTR_variant=9;downstream_gene_variant=29	1	1	0	0	0	12.83	24.83	9.08	8.17	0.98	0.98	0.97	0.97	cons	CONS
protein_coding	Spata24	ENSMUST00000025209	ENSMUST00000096573	protein_coding	protein_coding	TRUE	TRUE	intron_variant=33;synonymous_variant=1;feature_truncation=3;upstream_gene_variant=2	downstream_gene_variant=29;3_prime_UTR_variant=1;missense_variant=1;intron_variant=3;upstream_gene_variant=2	0	1	0	0	0	14.33	15.5	3.5	10.58	0.48	0.61	0.5	0.55	cons	CIS&TRANS
lincRNA	AC025794.1	ENSMUST00000180819	ENSMUST00000181422	lincRNA	lincRNA	TRUE	NA	upstream_gene_variant=23;non_coding_exon_variant=14;nc_transcript_variant=16;feature_truncation=3;intron_variant=2;feature_elongation=2	upstream_gene_variant=23;non_coding_exon_variant=14;nc_transcript_variant=16;feature_truncation=3;feature_elongation=2;intron_variant=2	0	0	0	1	1	19.33	18	9.25	8.42	0.76	0.7	0.72	0.8	cons	Not in Dataset
protein_coding	Wdr59	ENSMUST00000038193	ENSMUST00000034437	protein_coding	protein_coding	TRUE	TRUE	3_prime_UTR_variant=3;feature_truncation=37;intron_variant=351;feature_elongation=44;splice_region_variant=1;synonymous_variant=4;5_prime_UTR_variant=1;upstream_gene_variant=2	3_prime_UTR_variant=3;feature_truncation=37;intron_variant=351;feature_elongation=44;splice_region_variant=1;synonymous_variant=4;5_prime_UTR_variant=1;upstream_gene_variant=2	0	0	0	0	1	16.5	21.67	5.42	13.5	0.95	0.84	0.85	0.71	NA	CONS
protein_coding	Lamc1	ENSMUST00000027752	ENSMUST00000161744	protein_coding	protein_coding	TRUE	TRUE	downstream_gene_variant=2;3_prime_UTR_variant=16;feature_truncation=104;feature_elongation=105;synonymous_variant=24;intron_variant=1256;missense_variant=5;splice_region_variant=4;upstream_gene_variant=1	downstream_gene_variant=2;3_prime_UTR_variant=10;feature_truncation=9;intron_variant=87;feature_elongation=11;synonymous_variant=1;upstream_gene_variant=46	1	0	0	0	1	15.33	20.17	9.92	9.17	0.49	0.78	0.79	0.67	NA	CONS
protein_coding	Chrna4	ENSMUST00000067120	ENSMUST00000124400	protein_coding	protein_coding	TRUE	TRUE	downstream_gene_variant=32;3_prime_UTR_variant=9;feature_truncation=8;synonymous_variant=6;intron_variant=109;feature_elongation=12;missense_variant=3;upstream_gene_variant=43	downstream_gene_variant=36;intron_variant=76;feature_elongation=10;synonymous_variant=2;feature_truncation=2;missense_variant=1;upstream_gene_variant=4	1	1	0	0	0	68.5	25.17	27.83	33.33	0.87	0.97	0.95	0.92	cons	CONS
protein_coding	Kctd13	ENSMUST00000032924	ENSMUST00000141369	protein_coding	retained_intron	TRUE	NA	5_prime_UTR_variant=3;intron_variant=97;feature_elongation=11;feature_truncation=6;synonymous_variant=2;missense_variant=1;3_prime_UTR_variant=6;downstream_gene_variant=2	upstream_gene_variant=6;non_coding_exon_variant=8;nc_transcript_variant=60;feature_truncation=4;intron_variant=52;feature_elongation=8;downstream_gene_variant=45	1	1	0	0	0	18.67	22.33	16.58	13.08	0.9	0.86	0.96	0.86	cons	CONS
lincRNA	RP23-155H5.2	ENSMUST00000181530	ENSMUST00000181231	lincRNA	lincRNA	TRUE	NA	non_coding_exon_variant=32;nc_transcript_variant=265;intron_variant=233;feature_truncation=21;feature_elongation=14	downstream_gene_variant=29;non_coding_exon_variant=18;nc_transcript_variant=20;splice_region_variant=1;intron_variant=2;upstream_gene_variant=81	1	1	0	0	1	13.33	12	7.92	17.75	0.43	0.46	0.47	0.29	cons	Not in Dataset
protein_coding	Casp8	ENSMUST00000027189	ENSMUST00000165549	protein_coding	protein_coding	TRUE	FALSE	upstream_gene_variant=1;5_prime_UTR_variant=15;intron_variant=501;feature_truncation=34;feature_elongation=45;synonymous_variant=4;missense_variant=3;splice_region_variant=3;3_prime_UTR_variant=3	upstream_gene_variant=44;5_prime_UTR_variant=2;intron_variant=436;feature_elongation=38;feature_truncation=24;synonymous_variant=4;missense_variant=3;splice_region_variant=3;3_prime_UTR_variant=3	1	0	0	0	0	60.33	21.17	20.75	8.25	0.72	0.81	0.66	0.68	NA	CIS
protein_coding	Zfp318	ENSMUST00000113481	ENSMUST00000138127	protein_coding	protein_coding	TRUE	TRUE	missense_variant=7;intron_variant=94;feature_truncation=14;feature_elongation=10;synonymous_variant=2;3_prime_UTR_variant=4;downstream_gene_variant=25	missense_variant=4;intron_variant=131;feature_truncation=16;feature_elongation=13;3_prime_UTR_variant=2;downstream_gene_variant=1	0	1	1	0	1	14.33	20.17	7.08	6.92	0.73	0.77	0.58	0.6	cons	CONS
protein_coding	Acer2	ENSMUST00000045224	ENSMUST00000128712	protein_coding	processed_transcript	TRUE	NA	upstream_gene_variant=2;intron_variant=512;feature_truncation=41;feature_elongation=44;3_prime_UTR_variant=47;downstream_gene_variant=66	upstream_gene_variant=2;intron_variant=680;nc_transcript_variant=686;feature_truncation=50;feature_elongation=51;non_coding_exon_variant=6;downstream_gene_variant=23	0	1	1	0	0	6.5	19.5	0.67	1.42	0.64	0.74	0.8	0.43	cons	CONS
protein_coding	Fbxo11	ENSMUST00000005504	ENSMUST00000130379	protein_coding	protein_coding	TRUE	TRUE	3_prime_UTR_variant=1;feature_elongation=73;synonymous_variant=6;intron_variant=704;feature_truncation=73;splice_region_variant=2	3_prime_UTR_variant=1;feature_elongation=73;synonymous_variant=6;intron_variant=704;feature_truncation=73;splice_region_variant=2	0	0	1	0	1	44.17	15.83	14.33	5.25	0.1	0.6	0.25	0.67	NA	CONS
protein_coding	Sike1	ENSMUST00000029447	ENSMUST00000151065	protein_coding	retained_intron	TRUE	NA	5_prime_UTR_variant=1;intron_variant=14;feature_truncation=2;3_prime_UTR_variant=3	non_coding_exon_variant=5;nc_transcript_variant=6;intron_variant=1;downstream_gene_variant=12	0	1	1	0	1	18.33	23.67	10.67	7.33	0.95	0.89	0.98	0.93	cons	CONS
protein_coding	Zfp553	ENSMUST00000106312	ENSMUST00000056232	protein_coding	protein_coding	TRUE	FALSE	upstream_gene_variant=1;5_prime_UTR_variant=5;feature_truncation=3;feature_elongation=2;intron_variant=14;synonymous_variant=13;3_prime_UTR_variant=7	upstream_gene_variant=5;5_prime_UTR_variant=1;intron_variant=14;feature_elongation=1;synonymous_variant=13;3_prime_UTR_variant=7;feature_truncation=2	0	0	1	1	1	13.83	9.33	5.42	2	0.22	0.35	0.4	0.44	NA	CONS
protein_coding	Lyrm1	ENSMUST00000106518	ENSMUST00000106517	protein_coding	protein_coding	TRUE	FALSE	upstream_gene_variant=41;intron_variant=200;feature_elongation=25;feature_truncation=13;3_prime_UTR_variant=4	upstream_gene_variant=38;5_prime_UTR_variant=2;intron_variant=197;feature_elongation=24;feature_truncation=13;3_prime_UTR_variant=4	1	0	0	1	1	20	23.5	0.67	7	0.9	0.88	0	0.86	NA	CIS&TRANS
protein_coding	Stk4	ENSMUST00000018353	ENSMUST00000088291	protein_coding	protein_coding	TRUE	TRUE	upstream_gene_variant=34;intron_variant=879;feature_truncation=48;feature_elongation=85;synonymous_variant=6;3_prime_UTR_variant=45	upstream_gene_variant=34;intron_variant=511;feature_elongation=55;feature_truncation=25;synonymous_variant=2;3_prime_UTR_variant=45	1	0	0	0	0	19.5	24.67	8.83	4.33	0.39	0.92	0.85	0.56	trans	CONS
protein_coding	Taf1d	ENSMUST00000034415	ENSMUST00000164079	protein_coding	protein_coding	TRUE	TRUE	upstream_gene_variant=44;5_prime_UTR_variant=1;intron_variant=41;feature_elongation=8;feature_truncation=4;synonymous_variant=2;missense_variant=3;splice_region_variant=3;3_prime_UTR_variant=1;downstream_gene_variant=2	upstream_gene_variant=44;5_prime_UTR_variant=1;intron_variant=41;feature_elongation=8;feature_truncation=4;synonymous_variant=2;missense_variant=1;splice_region_variant=3;3_prime_UTR_variant=3;downstream_gene_variant=2	0	0	0	0	1	18.17	14.5	3.5	7.92	0.85	0.54	0.8	0.67	NA	CONS
protein_coding	Lpp	ENSMUST00000038053	ENSMUST00000115314	protein_coding	protein_coding	TRUE	TRUE	5_prime_UTR_variant=1;intron_variant=5813;feature_truncation=319;feature_elongation=385;synonymous_variant=8;3_prime_UTR_variant=100	upstream_gene_variant=99;intron_variant=2648;synonymous_variant=7;feature_elongation=165;feature_truncation=164;3_prime_UTR_variant=100	1	0	0	0	1	11.33	25.33	4.92	4.58	0.65	0.94	0.58	0.75	NA	CONS
protein_coding	Car11	ENSMUST00000003360	ENSMUST00000137294	protein_coding	retained_intron	TRUE	NA	5_prime_UTR_variant=2;feature_truncation=1;intron_variant=26;feature_elongation=2;synonymous_variant=2;splice_region_variant=1;downstream_gene_variant=3	upstream_gene_variant=4;non_coding_exon_variant=4;nc_transcript_variant=19;intron_variant=15;feature_elongation=1;splice_region_variant=1;downstream_gene_variant=10	1	1	0	0	1	2.67	12.67	2.33	4.33	0.51	0.47	0.43	0.29	cons	CONS
protein_coding	Fnip1	ENSMUST00000046835	ENSMUST00000143650	protein_coding	protein_coding	TRUE	TRUE	intron_variant=404;feature_truncation=31;feature_elongation=46;synonymous_variant=2;missense_variant=1;3_prime_UTR_variant=10;downstream_gene_variant=2	upstream_gene_variant=26;5_prime_UTR_variant=7;feature_truncation=16;intron_variant=230;feature_elongation=25;synonymous_variant=2;missense_variant=1;downstream_gene_variant=14	1	1	0	0	0	23.17	25.67	9.08	17.58	1	0.95	0.98	0.98	NA	CONS
protein_coding	Ddx20	ENSMUST00000090680	ENSMUST00000132008	protein_coding	retained_intron	TRUE	NA	3_prime_UTR_variant=1;synonymous_variant=9;missense_variant=5;intron_variant=72;feature_truncation=3;feature_elongation=4;5_prime_UTR_variant=1	downstream_gene_variant=21;non_coding_exon_variant=15;nc_transcript_variant=66;feature_truncation=3;feature_elongation=4;intron_variant=51;upstream_gene_variant=1	0	1	1	0	1	29	25.5	12.25	14.5	0.96	0.94	0.95	0.96	cons	CONS
protein_coding	Actr5	ENSMUST00000142531	ENSMUST00000045644	retained_intron	protein_coding	TRUE	NA	upstream_gene_variant=5;non_coding_exon_variant=31;nc_transcript_variant=177;intron_variant=146;feature_elongation=13;feature_truncation=7;splice_region_variant=1	upstream_gene_variant=5;5_prime_UTR_variant=1;synonymous_variant=17;intron_variant=156;feature_elongation=13;feature_truncation=7;splice_region_variant=1;missense_variant=1;3_prime_UTR_variant=2	0	0	0	1	1	19.83	10.33	7.25	6.92	0.21	0.38	0.41	0.42	cons	CONS
protein_coding	Tshz1	ENSMUST00000060303	ENSMUST00000175783	protein_coding	protein_coding	TRUE	TRUE	downstream_gene_variant=1;3_prime_UTR_variant=10;feature_truncation=57;feature_elongation=75;synonymous_variant=5;missense_variant=3;intron_variant=639;5_prime_UTR_variant=2	downstream_gene_variant=5;3_prime_UTR_variant=6;feature_truncation=56;feature_elongation=75;synonymous_variant=5;missense_variant=2;5_prime_UTR_variant=2;intron_variant=640	0	0	1	1	1	18.17	18	8.17	8.58	1	0.66	0.94	0.74	NA	CONS
protein_coding	Kctd9	ENSMUST00000078053	ENSMUST00000156700	protein_coding	nonsense_mediated_decay	TRUE	TRUE	missense_variant=1;intron_variant=292;feature_elongation=22;feature_truncation=25;splice_region_variant=1;3_prime_UTR_variant=10	missense_variant=1;NMD_transcript_variant=302;intron_variant=292;feature_elongation=22;feature_truncation=25;splice_region_variant=1;3_prime_UTR_variant=9;downstream_gene_variant=1	0	0	1	1	1	15.5	15.33	5.42	5	0.38	0.56	0.6	0.64	cons	CONS
protein_coding	Chd1	ENSMUST00000024627	ENSMUST00000174461	protein_coding	protein_coding	TRUE	TRUE	5_prime_UTR_variant=2;intron_variant=599;feature_elongation=67;feature_truncation=53;missense_variant=6;synonymous_variant=12;splice_region_variant=2;3_prime_UTR_variant=15	upstream_gene_variant=28;intron_variant=143;feature_elongation=14;synonymous_variant=4;feature_truncation=16;splice_region_variant=1;3_prime_UTR_variant=3;downstream_gene_variant=73	1	1	0	0	0	18.83	23.67	11.42	8.92	0.82	0.86	0.94	0.97	cons	CONS
protein_coding	Mdm4	ENSMUST00000067429	ENSMUST00000067398	protein_coding	protein_coding	TRUE	TRUE	downstream_gene_variant=2;3_prime_UTR_variant=7;intron_variant=298;feature_elongation=33;feature_truncation=27;splice_region_variant=3;missense_variant=1;5_prime_UTR_variant=1;upstream_gene_variant=2	downstream_gene_variant=8;3_prime_UTR_variant=1;intron_variant=298;feature_elongation=33;feature_truncation=27;splice_region_variant=2;missense_variant=1;5_prime_UTR_variant=1;upstream_gene_variant=2	0	0	1	1	1	7	19.83	7.75	5.83	0.63	0.72	0.67	0.56	cons	Not in Dataset
protein_coding	Parp14	ENSMUST00000042665	ENSMUST00000142946	protein_coding	retained_intron	TRUE	NA	downstream_gene_variant=5;3_prime_UTR_variant=16;feature_truncation=12;synonymous_variant=13;intron_variant=232;feature_elongation=18;missense_variant=12;splice_region_variant=4;5_prime_UTR_variant=2;upstream_gene_variant=2	downstream_gene_variant=19;non_coding_exon_variant=22;nc_transcript_variant=115;intron_variant=93;feature_truncation=5;feature_elongation=9;splice_region_variant=2;upstream_gene_variant=4	0	1	1	0	0	25.33	27.17	11.5	12.58	0.98	0.98	0.98	0.99	cons	CONS
protein_coding	Rnf111	ENSMUST00000034739	ENSMUST00000113595	protein_coding	protein_coding	TRUE	FALSE	3_prime_UTR_variant=7;feature_elongation=55;feature_truncation=35;intron_variant=353;synonymous_variant=7;missense_variant=2;splice_region_variant=1;5_prime_UTR_variant=1	3_prime_UTR_variant=7;feature_elongation=55;feature_truncation=35;intron_variant=352;synonymous_variant=7;missense_variant=2;splice_region_variant=1;5_prime_UTR_variant=1;upstream_gene_variant=1	1	0	0	1	0	20	17.5	5.5	10.17	0.68	0.63	0.5	0.64	NA	CONS
protein_coding	Ccdc142	ENSMUST00000101253	ENSMUST00000134891	nonsense_mediated_decay	retained_intron	TRUE	NA	5_prime_UTR_variant=1;NMD_transcript_variant=30;synonymous_variant=2;missense_variant=4;intron_variant=18;feature_truncation=1;feature_elongation=1;splice_region_variant=1;3_prime_UTR_variant=5	upstream_gene_variant=21;non_coding_exon_variant=1;nc_transcript_variant=1;downstream_gene_variant=6	1	1	0	0	0	8.67	19.5	9.58	8.75	0.88	0.7	0.85	0.87	cons	CONS
protein_coding	Zmynd19	ENSMUST00000028350	ENSMUST00000148042	protein_coding	processed_transcript	TRUE	NA	intron_variant=86;feature_truncation=14;synonymous_variant=1;feature_elongation=2;3_prime_UTR_variant=28;downstream_gene_variant=46	non_coding_exon_variant=2;nc_transcript_variant=87;feature_truncation=11;intron_variant=85;feature_elongation=2;downstream_gene_variant=52	1	0	0	1	0	15.17	15.67	6.42	10.42	0.78	0.56	0.88	0.81	NA	CONS
protein_coding	Galnt10	ENSMUST00000066987	ENSMUST00000108846	protein_coding	protein_coding	TRUE	TRUE	intron_variant=1270;feature_elongation=99;feature_truncation=68;synonymous_variant=7;missense_variant=1;3_prime_UTR_variant=30;downstream_gene_variant=1	intron_variant=386;feature_elongation=45;feature_truncation=23;3_prime_UTR_variant=11;downstream_gene_variant=62	0	1	1	0	0	12.5	24.67	10.92	11.67	0.81	0.88	0.89	0.94	cons	TRANS
protein_coding	Slco3a1	ENSMUST00000098371	ENSMUST00000026897	protein_coding	protein_coding	TRUE	TRUE	downstream_gene_variant=2;3_prime_UTR_variant=1;intron_variant=3586;feature_elongation=197;feature_truncation=160;synonymous_variant=6;upstream_gene_variant=1	downstream_gene_variant=44;3_prime_UTR_variant=9;feature_elongation=191;feature_truncation=156;synonymous_variant=6;intron_variant=3532;upstream_gene_variant=1	0	1	1	0	0	7.17	19.5	2.83	5.5	0.68	0.69	0.55	0.6	cons	CONS
protein_coding	Ank3	ENSMUST00000047061	ENSMUST00000092433	protein_coding	protein_coding	TRUE	TRUE	upstream_gene_variant=1;intron_variant=6002;feature_elongation=441;feature_truncation=406;synonymous_variant=11;splice_region_variant=3;missense_variant=1;downstream_gene_variant=53	upstream_gene_variant=33;5_prime_UTR_variant=2;feature_elongation=82;intron_variant=987;feature_truncation=75;synonymous_variant=13;splice_region_variant=3;missense_variant=1;3_prime_UTR_variant=32	1	1	0	0	1	15.33	2.83	7.58	1.58	0.36	0.1	0.33	0.04	cis	CIS
protein_coding	Fubp1	ENSMUST00000166984	ENSMUST00000106121	protein_coding	protein_coding	TRUE	FALSE	upstream_gene_variant=37;5_prime_UTR_variant=1;intron_variant=226;feature_truncation=21;feature_elongation=37;synonymous_variant=9;splice_region_variant=3;missense_variant=1;3_prime_UTR_variant=23;downstream_gene_variant=2	upstream_gene_variant=37;5_prime_UTR_variant=1;intron_variant=239;feature_truncation=21;feature_elongation=37;synonymous_variant=9;splice_region_variant=3;missense_variant=1;3_prime_UTR_variant=10;downstream_gene_variant=2	0	0	1	1	1	34	27	13.92	10.5	0.91	0.95	0.99	0.9	cons	CONS
protein_coding	Pcsk5	ENSMUST00000025618	ENSMUST00000050715	protein_coding	protein_coding	TRUE	TRUE	downstream_gene_variant=1;3_prime_UTR_variant=6;synonymous_variant=33;intron_variant=5221;feature_truncation=277;feature_elongation=338;missense_variant=7;splice_region_variant=3;5_prime_UTR_variant=9	downstream_gene_variant=49;3_prime_UTR_variant=22;feature_elongation=254;feature_truncation=206;intron_variant=3652;synonymous_variant=15;missense_variant=1;splice_region_variant=2;5_prime_UTR_variant=9	0	1	0	0	0	6.83	25.33	4	9.83	0.69	0.89	0.78	0.87	NA	CONS
protein_coding	Rps6ka1	ENSMUST00000105894	ENSMUST00000168974	protein_coding	protein_coding	TRUE	TRUE	3_prime_UTR_variant=6;synonymous_variant=6;intron_variant=484;feature_truncation=33;feature_elongation=30;splice_region_variant=2;5_prime_UTR_variant=1	downstream_gene_variant=1;3_prime_UTR_variant=5;synonymous_variant=6;intron_variant=359;feature_truncation=26;feature_elongation=24;splice_region_variant=2;5_prime_UTR_variant=2;upstream_gene_variant=46	1	0	0	1	0	27	23.17	6.42	12.17	0.56	0.81	0.5	0.67	NA	CONS
lincRNA	AL732311.1	ENSMUST00000180659	ENSMUST00000181621	lincRNA	lincRNA	TRUE	NA	non_coding_exon_variant=11;nc_transcript_variant=37;feature_elongation=3;feature_truncation=4;intron_variant=26;splice_region_variant=1;upstream_gene_variant=1	downstream_gene_variant=3;non_coding_exon_variant=26;nc_transcript_variant=34;feature_elongation=2;feature_truncation=3;splice_region_variant=1;intron_variant=8;upstream_gene_variant=1	0	0	1	1	1	25.67	20.33	12.67	5.75	0.8	0.71	0.5	0.62	cons	Not in Dataset
pseudogene	Gm5062	ENSMUST00000180453	ENSMUST00000075786	unprocessed_pseudogene	unprocessed_pseudogene	TRUE	NA	downstream_gene_variant=4;non_coding_exon_variant=40;nc_transcript_variant=89;intron_variant=49;splice_region_variant=3;feature_truncation=5;feature_elongation=2;upstream_gene_variant=9	downstream_gene_variant=4;non_coding_exon_variant=28;nc_transcript_variant=89;intron_variant=61;splice_region_variant=3;feature_truncation=5;feature_elongation=2;upstream_gene_variant=9	0	0	0	0	1	14.5	28.67	38.17	6.83	0.45	1	0.47	0.95	cis	Not in Dataset
protein_coding	Dnajc24	ENSMUST00000102555	ENSMUST00000124163	protein_coding	processed_transcript	TRUE	NA	3_prime_UTR_variant=4;missense_variant=1;intron_variant=170;feature_truncation=17;feature_elongation=12	downstream_gene_variant=1;non_coding_exon_variant=4;nc_transcript_variant=174;intron_variant=170;feature_truncation=17;feature_elongation=12	0	0	1	1	1	19.67	18.17	7.33	10	0.76	0.63	0.6	0.89	cons	CONS
protein_coding	Ankrd33b	ENSMUST00000123325	ENSMUST00000076942	protein_coding	protein_coding	TRUE	TRUE	3_prime_UTR_variant=85;feature_elongation=97;feature_truncation=74;synonymous_variant=10;missense_variant=4;intron_variant=1168;upstream_gene_variant=1	downstream_gene_variant=101;3_prime_UTR_variant=9;feature_truncation=33;missense_variant=1;splice_region_variant=1;synonymous_variant=1;intron_variant=600;feature_elongation=49;upstream_gene_variant=1	0	1	1	0	1	26	26	6.17	0.58	0.57	0.9	0.36	0.25	cis	CIS&TRANS
protein_coding	Extl2	ENSMUST00000029575	ENSMUST00000106502	protein_coding	protein_coding	TRUE	FALSE	5_prime_UTR_variant=5;intron_variant=208;feature_elongation=21;feature_truncation=28;synonymous_variant=2;missense_variant=1;3_prime_UTR_variant=19;downstream_gene_variant=2	upstream_gene_variant=5;intron_variant=208;feature_elongation=21;feature_truncation=28;synonymous_variant=2;missense_variant=1;3_prime_UTR_variant=16;downstream_gene_variant=5	1	0	0	1	0	14.67	16.5	12.25	4.75	0.62	0.57	0.62	0.49	cons	CONS
protein_coding	Kctd6	ENSMUST00000022272	ENSMUST00000170111	protein_coding	protein_coding	TRUE	FALSE	upstream_gene_variant=1;5_prime_UTR_variant=1;feature_truncation=7;intron_variant=97;feature_elongation=12;synonymous_variant=3;3_prime_UTR_variant=9;downstream_gene_variant=4	upstream_gene_variant=2;5_prime_UTR_variant=19;feature_truncation=6;feature_elongation=12;intron_variant=78;synonymous_variant=3;3_prime_UTR_variant=9;downstream_gene_variant=4	1	0	0	1	0	46	25.5	18.58	19.67	0.97	0.88	0.98	0.77	NA	CONS
protein_coding	Glt8d1	ENSMUST00000168584	ENSMUST00000022476	protein_coding	protein_coding	TRUE	FALSE	upstream_gene_variant=2;intron_variant=82;feature_truncation=12;feature_elongation=7;missense_variant=2;splice_region_variant=1;synonymous_variant=2;3_prime_UTR_variant=8	upstream_gene_variant=2;5_prime_UTR_variant=7;feature_truncation=12;intron_variant=75;feature_elongation=7;missense_variant=2;splice_region_variant=1;synonymous_variant=2;3_prime_UTR_variant=8	1	0	0	0	0	22.67	15.67	6.17	6.17	0.68	0.54	0.32	0.58	cons	CONS
protein_coding	A130010J15Rik	ENSMUST00000110831	ENSMUST00000178744	protein_coding	protein_coding	TRUE	FALSE	upstream_gene_variant=55;5_prime_UTR_variant=7;intron_variant=10;feature_elongation=4;missense_variant=4;synonymous_variant=1;3_prime_UTR_variant=16;feature_truncation=4;downstream_gene_variant=23	upstream_gene_variant=55;5_prime_UTR_variant=6;splice_region_variant=1;intron_variant=11;feature_elongation=4;missense_variant=4;synonymous_variant=1;3_prime_UTR_variant=37;feature_truncation=6;downstream_gene_variant=2	0	0	1	1	1	8.83	5.83	4.42	2	0.41	0.2	0.41	0.17	cis	CONS
antisense	Gm17344	ENSMUST00000173980	ENSMUST00000171173	antisense	antisense	TRUE	NA	intron_variant=65;nc_transcript_variant=76;non_coding_exon_variant=11;feature_elongation=2;feature_truncation=3;upstream_gene_variant=2	downstream_gene_variant=13;non_coding_exon_variant=16;nc_transcript_variant=63;feature_elongation=2;feature_truncation=3;intron_variant=47;upstream_gene_variant=2	0	1	1	0	0	0.17	10.5	2.33	1.5	1	0.36	0.17	0.22	cons	Not in Dataset
protein_coding	Sh3yl1	ENSMUST00000020997	ENSMUST00000142693	protein_coding	retained_intron	TRUE	NA	upstream_gene_variant=22;5_prime_UTR_variant=3;intron_variant=496;feature_elongation=47;feature_truncation=37;synonymous_variant=2;missense_variant=2;3_prime_UTR_variant=1;downstream_gene_variant=1	upstream_gene_variant=22;non_coding_exon_variant=16;nc_transcript_variant=503;intron_variant=487;feature_elongation=47;feature_truncation=37;downstream_gene_variant=2	0	0	0	1	1	30.5	25.5	13.67	14.08	0.86	0.87	0.81	0.96	cons	CONS
protein_coding	Dtx2	ENSMUST00000111142	ENSMUST00000142041	protein_coding	retained_intron	TRUE	NA	intron_variant=317;feature_truncation=26;feature_elongation=42;splice_region_variant=1;synonymous_variant=5;3_prime_UTR_variant=2;downstream_gene_variant=1	upstream_gene_variant=16;non_coding_exon_variant=32;nc_transcript_variant=102;feature_elongation=16;intron_variant=70;feature_truncation=6;downstream_gene_variant=1	1	0	0	1	1	7.67	17.67	0.58	1.17	0.87	0.6	0.33	0.14	cons	CIS
protein_coding	Cdk2	ENSMUST00000026416	ENSMUST00000026415	protein_coding	protein_coding	TRUE	TRUE	3_prime_UTR_variant=11;feature_elongation=6;intron_variant=23;feature_truncation=1	3_prime_UTR_variant=11;feature_elongation=6;intron_variant=23;feature_truncation=1	0	0	0	0	1	22.17	17.67	0.58	6.67	0.5	0.6	0.5	0.62	NA	CONS
protein_coding	Tacc2	ENSMUST00000059145	ENSMUST00000084513	protein_coding	protein_coding	TRUE	TRUE	missense_variant=6;intron_variant=2563;feature_truncation=144;feature_elongation=190;synonymous_variant=10;splice_region_variant=2;3_prime_UTR_variant=7;downstream_gene_variant=1	missense_variant=51;intron_variant=2496;feature_truncation=144;feature_elongation=190;synonymous_variant=31;stop_gained=1;splice_region_variant=3;3_prime_UTR_variant=7;downstream_gene_variant=1	0	0	0	1	1	25.17	25.67	8.17	6	0.92	0.87	0.79	0.82	cons	CONS
protein_coding	Gm15446	ENSMUST00000112544	ENSMUST00000146564	protein_coding	retained_intron	TRUE	NA	upstream_gene_variant=1;5_prime_UTR_variant=1;intron_variant=104;feature_truncation=7;feature_elongation=12;splice_region_variant=1;missense_variant=2;synonymous_variant=4;3_prime_UTR_variant=1	upstream_gene_variant=33;non_coding_exon_variant=9;nc_transcript_variant=25;intron_variant=16;feature_elongation=3;feature_truncation=2;splice_region_variant=1;downstream_gene_variant=8	1	1	0	0	0	12	24.5	8.75	10.5	0.94	0.83	1	0.79	cons	Not in Dataset
protein_coding	Parp4	ENSMUST00000161553	ENSMUST00000162312	protein_coding	retained_intron	TRUE	NA	upstream_gene_variant=1;intron_variant=859;feature_truncation=71;feature_elongation=66;synonymous_variant=20;splice_region_variant=4;missense_variant=15;3_prime_UTR_variant=4;downstream_gene_variant=1	upstream_gene_variant=57;non_coding_exon_variant=7;nc_transcript_variant=36;feature_truncation=5;intron_variant=29;feature_elongation=3;splice_region_variant=1;downstream_gene_variant=1	1	0	0	1	0	19.83	26	10.75	12	0.61	0.88	0.89	0.76	NA	CONS
protein_coding	Myh10	ENSMUST00000102611	ENSMUST00000139059	protein_coding	processed_transcript	TRUE	NA	upstream_gene_variant=4;5_prime_UTR_variant=2;intron_variant=1246;feature_truncation=97;feature_elongation=112;synonymous_variant=20;splice_region_variant=2;3_prime_UTR_variant=4;downstream_gene_variant=8	upstream_gene_variant=31;intron_variant=2;nc_transcript_variant=6;non_coding_exon_variant=4;downstream_gene_variant=8	1	0	0	1	0	25.17	18.17	5.5	5.58	0.16	0.61	0.34	0.42	NA	CONS
protein_coding	Ntpcr	ENSMUST00000034313	ENSMUST00000065135	protein_coding	protein_coding	TRUE	TRUE	upstream_gene_variant=70;5_prime_UTR_variant=3;intron_variant=156;feature_elongation=18;feature_truncation=7;splice_region_variant=1;synonymous_variant=2;3_prime_UTR_variant=10	upstream_gene_variant=71;5_prime_UTR_variant=2;intron_variant=25;feature_elongation=3;3_prime_UTR_variant=12;downstream_gene_variant=66	0	1	1	0	0	37	23.67	19.08	7.17	0.75	0.78	0.73	0.59	cons	Not in Dataset
protein_coding	Klhl20	ENSMUST00000111611	ENSMUST00000148952	protein_coding	retained_intron	TRUE	NA	downstream_gene_variant=2;3_prime_UTR_variant=5;feature_truncation=13;intron_variant=101;feature_elongation=10;synonymous_variant=1	downstream_gene_variant=14;non_coding_exon_variant=8;nc_transcript_variant=85;feature_elongation=8;intron_variant=77;feature_truncation=9	0	1	0	0	0	17.33	16.83	5.25	10.5	0.71	0.55	0.66	0.33	cis	CIS&TRANS
protein_coding	Crlf3	ENSMUST00000061283	ENSMUST00000178280	protein_coding	retained_intron	TRUE	NA	downstream_gene_variant=2;3_prime_UTR_variant=8;feature_truncation=39;feature_elongation=29;intron_variant=335;missense_variant=3;synonymous_variant=2;upstream_gene_variant=1	downstream_gene_variant=26;non_coding_exon_variant=28;nc_transcript_variant=229;feature_elongation=21;feature_truncation=21;intron_variant=201;upstream_gene_variant=1	0	1	1	0	0	21	20.83	5.92	6.67	0.95	0.68	0.69	0.59	trans	CONS
protein_coding	Lyrm7	ENSMUST00000144164	ENSMUST00000141703	protein_coding	nonsense_mediated_decay	TRUE	TRUE	downstream_gene_variant=97;3_prime_UTR_variant=17;feature_elongation=17;intron_variant=220;feature_truncation=17;synonymous_variant=1	downstream_gene_variant=97;3_prime_UTR_variant=26;NMD_transcript_variant=238;feature_elongation=17;intron_variant=211;feature_truncation=17;synonymous_variant=1	0	0	1	1	1	12.17	28	4.08	11.17	0.96	0.91	0.86	0.83	cons	CIS
protein_coding	Tmem168	ENSMUST00000031554	ENSMUST00000149123	protein_coding	processed_transcript	TRUE	NA	3_prime_UTR_variant=2;feature_truncation=18;synonymous_variant=11;intron_variant=163;feature_elongation=19;missense_variant=5;5_prime_UTR_variant=3	non_coding_exon_variant=9;nc_transcript_variant=184;feature_truncation=18;intron_variant=175;feature_elongation=19	0	0	0	0	1	25	17	8.75	7.58	0.41	0.55	0.68	0.79	cons	CONS
protein_coding	Lcmt2	ENSMUST00000099486	ENSMUST00000110674	protein_coding	protein_coding	TRUE	TRUE	downstream_gene_variant=2;3_prime_UTR_variant=2;frameshift_variant=1;feature_truncation=4;intron_variant=49;feature_elongation=2;missense_variant=3;synonymous_variant=2;5_prime_UTR_variant=3;upstream_gene_variant=37	downstream_gene_variant=18;3_prime_UTR_variant=8;missense_variant=7;synonymous_variant=3;5_prime_UTR_variant=1;upstream_gene_variant=37	0	1	1	0	1	20.83	23.83	13.17	8.5	0.41	0.77	0.2	0.44	NA	CONS
protein_coding	Ccnt1	ENSMUST00000169707	ENSMUST00000130921	protein_coding	retained_intron	TRUE	NA	downstream_gene_variant=6;3_prime_UTR_variant=27;feature_truncation=30;feature_elongation=25;missense_variant=2;synonymous_variant=3;intron_variant=205;5_prime_UTR_variant=6;upstream_gene_variant=1	downstream_gene_variant=21;non_coding_exon_variant=10;nc_transcript_variant=72;feature_elongation=7;feature_truncation=8;intron_variant=62;upstream_gene_variant=40	1	1	0	0	0	19.17	29.5	9.75	9	0.93	0.95	0.91	0.98	NA	CONS
protein_coding	Trim23	ENSMUST00000022225	ENSMUST00000069187	protein_coding	protein_coding	TRUE	TRUE	intron_variant=126;splice_region_variant=2;feature_elongation=9;feature_truncation=12;synonymous_variant=1;3_prime_UTR_variant=4;downstream_gene_variant=3	intron_variant=126;splice_region_variant=2;feature_elongation=9;feature_truncation=12;synonymous_variant=1;3_prime_UTR_variant=7	0	0	1	1	1	13	24	3	10.58	0.47	0.77	0.41	0.52	NA	CONS
protein_coding	Heatr6	ENSMUST00000001002	ENSMUST00000125831	protein_coding	processed_transcript	TRUE	NA	upstream_gene_variant=2;intron_variant=285;feature_elongation=20;feature_truncation=15;synonymous_variant=15;missense_variant=3;3_prime_UTR_variant=37;downstream_gene_variant=4	upstream_gene_variant=2;non_coding_exon_variant=25;nc_transcript_variant=308;intron_variant=283;feature_elongation=19;feature_truncation=14;downstream_gene_variant=36	0	0	1	1	1	22.83	20.67	12.25	11.33	0.96	0.66	0.86	0.89	trans	CONS
protein_coding	Stxbp6	ENSMUST00000120531	ENSMUST00000053768	protein_coding	protein_coding	TRUE	FALSE	3_prime_UTR_variant=28;feature_elongation=181;feature_truncation=170;intron_variant=2870;synonymous_variant=1;missense_variant=1;splice_region_variant=1;5_prime_UTR_variant=2;upstream_gene_variant=5	downstream_gene_variant=17;3_prime_UTR_variant=11;feature_truncation=169;intron_variant=2874;feature_elongation=180;synonymous_variant=1;missense_variant=1;5_prime_UTR_variant=2;upstream_gene_variant=1	1	0	0	1	0	23	21.67	9.83	7.58	0.57	0.69	0.64	0.64	cons	CIS
protein_coding	Maml1	ENSMUST00000135868	ENSMUST00000059458	protein_coding	protein_coding	TRUE	TRUE	downstream_gene_variant=1;3_prime_UTR_variant=7;feature_truncation=26;intron_variant=336;feature_elongation=34;inframe_deletion=2;synonymous_variant=7	downstream_gene_variant=1;3_prime_UTR_variant=7;feature_truncation=26;intron_variant=335;feature_elongation=34;synonymous_variant=8;inframe_deletion=2	0	0	1	0	1	14.5	14.83	6.67	9.5	0.42	0.47	0.47	0.24	cons	CONS
protein_coding	Mettl21a	ENSMUST00000114079	ENSMUST00000053469	protein_coding	protein_coding	TRUE	FALSE	downstream_gene_variant=1;3_prime_UTR_variant=9;feature_truncation=10;missense_variant=2;intron_variant=95;feature_elongation=6;5_prime_UTR_variant=1	downstream_gene_variant=1;3_prime_UTR_variant=9;feature_truncation=10;missense_variant=2;intron_variant=87;feature_elongation=6;5_prime_UTR_variant=8;upstream_gene_variant=1	0	0	1	1	1	32.83	30	9.08	11.92	0.87	0.95	0.55	0.9	cons	Not in Dataset
protein_coding	Slc26a11	ENSMUST00000050880	ENSMUST00000151612	protein_coding	processed_transcript	TRUE	NA	intron_variant=261;feature_truncation=18;missense_variant=6;synonymous_variant=12;feature_elongation=17;splice_region_variant=5;3_prime_UTR_variant=20;downstream_gene_variant=2	upstream_gene_variant=60;non_coding_exon_variant=45;nc_transcript_variant=203;feature_truncation=11;feature_elongation=12;intron_variant=158;splice_region_variant=5;downstream_gene_variant=2	1	0	0	1	0	26.5	27.17	13.25	11	0.92	0.86	0.87	0.73	cons	CONS
protein_coding	Zbtb40	ENSMUST00000049583	ENSMUST00000145505	protein_coding	retained_intron	TRUE	NA	downstream_gene_variant=2;3_prime_UTR_variant=39;feature_elongation=46;feature_truncation=57;synonymous_variant=22;intron_variant=724;missense_variant=10;splice_region_variant=4;5_prime_UTR_variant=5;upstream_gene_variant=3	downstream_gene_variant=76;non_coding_exon_variant=58;nc_transcript_variant=403;feature_truncation=35;feature_elongation=25;splice_region_variant=1;intron_variant=345;upstream_gene_variant=2	0	1	1	0	0	8.17	30.33	5.08	7.58	0.98	0.96	0.98	0.99	cons	CONS
protein_coding	Tada2a	ENSMUST00000018795	ENSMUST00000134994	protein_coding	processed_transcript	TRUE	NA	3_prime_UTR_variant=4;synonymous_variant=7;intron_variant=593;feature_truncation=51;feature_elongation=48;splice_region_variant=3;5_prime_UTR_variant=1;upstream_gene_variant=1	downstream_gene_variant=103;non_coding_exon_variant=7;nc_transcript_variant=27;feature_elongation=2;intron_variant=20;feature_truncation=2;upstream_gene_variant=57	1	1	0	0	0	25.17	30.83	11.42	19.67	0.91	0.97	0.97	0.98	cons	Not in Dataset
protein_coding	Tmem198b	ENSMUST00000051011	ENSMUST00000152966	protein_coding	nonsense_mediated_decay	TRUE	TRUE	3_prime_UTR_variant=3;synonymous_variant=2;intron_variant=12;splice_region_variant=1;feature_elongation=1;upstream_gene_variant=1	3_prime_UTR_variant=4;NMD_transcript_variant=16;synonymous_variant=3;missense_variant=1;intron_variant=5;splice_region_variant=1;5_prime_UTR_variant=3;feature_elongation=1;upstream_gene_variant=2	1	0	0	1	1	13.17	22.67	8.17	6.83	0.58	0.71	0.58	0.45	cons	Not in Dataset
protein_coding	Bid	ENSMUST00000160684	ENSMUST00000004560	nonsense_mediated_decay	protein_coding	TRUE	FALSE	downstream_gene_variant=1;3_prime_UTR_variant=15;NMD_transcript_variant=342;splice_region_variant=1;intron_variant=315;feature_elongation=33;feature_truncation=27;synonymous_variant=7;missense_variant=2;5_prime_UTR_variant=3;upstream_gene_variant=1	downstream_gene_variant=7;3_prime_UTR_variant=11;feature_elongation=32;intron_variant=313;feature_truncation=27;synonymous_variant=7;missense_variant=2;5_prime_UTR_variant=3;upstream_gene_variant=1	0	1	1	0	0	53.83	18.67	14.58	10.83	0.01	0.58	0.32	0.41	trans	CIS
protein_coding	Adam17	ENSMUST00000064536	ENSMUST00000155115	protein_coding	retained_intron	TRUE	NA	downstream_gene_variant=2;3_prime_UTR_variant=15;feature_elongation=55;feature_truncation=42;synonymous_variant=6;intron_variant=370;splice_region_variant=3;missense_variant=1;5_prime_UTR_variant=1;upstream_gene_variant=1	downstream_gene_variant=33;intron_variant=87;nc_transcript_variant=110;non_coding_exon_variant=23;feature_truncation=13;feature_elongation=8;upstream_gene_variant=50	1	1	0	0	1	18.17	28.33	2.33	1.17	0.9	0.88	0.52	0.38	cons	CONS
lincRNA	AC027184.1	ENSMUST00000181697	ENSMUST00000181482	lincRNA	lincRNA	TRUE	NA	non_coding_exon_variant=2;nc_transcript_variant=57;intron_variant=55;feature_elongation=8;feature_truncation=4;downstream_gene_variant=10	non_coding_exon_variant=12;nc_transcript_variant=67;intron_variant=55;feature_elongation=8;feature_truncation=5	0	0	1	1	1	6.17	14.17	1.5	11.25	0.32	0.44	0.2	0.5	cons	Not in Dataset
protein_coding	Rrp8	ENSMUST00000033179	ENSMUST00000098148	protein_coding	protein_coding	TRUE	TRUE	3_prime_UTR_variant=6;feature_elongation=3;feature_truncation=3;intron_variant=12;splice_region_variant=1;missense_variant=1;synonymous_variant=1;5_prime_UTR_variant=2	3_prime_UTR_variant=6;feature_elongation=3;feature_truncation=3;intron_variant=15;splice_region_variant=1;missense_variant=1	1	0	0	1	0	27.5	16.83	11.08	3	0.8	0.52	0.76	0.68	NA	CIS&TRANS
protein_coding	Ap4e1	ENSMUST00000149254	ENSMUST00000002063	retained_intron	protein_coding	TRUE	NA	intron_variant=306;nc_transcript_variant=325;feature_truncation=20;feature_elongation=25;non_coding_exon_variant=19;downstream_gene_variant=32	intron_variant=523;feature_truncation=38;feature_elongation=48;splice_region_variant=4;synonymous_variant=3;missense_variant=4;3_prime_UTR_variant=3	0	1	1	0	1	4.67	6.5	3.25	2.33	0.28	0.2	0.59	0.17	cons	CONS
protein_coding	Magi1	ENSMUST00000089317	ENSMUST00000055224	protein_coding	protein_coding	TRUE	TRUE	downstream_gene_variant=1;3_prime_UTR_variant=16;feature_truncation=429;feature_elongation=492;synonymous_variant=12;missense_variant=3;intron_variant=6396;splice_region_variant=4	downstream_gene_variant=1;3_prime_UTR_variant=19;feature_truncation=429;feature_elongation=492;synonymous_variant=11;intron_variant=6396;missense_variant=1;splice_region_variant=4	0	0	0	0	1	24.17	23.5	12	8.17	0.79	0.72	0.77	0.74	cons	CONS
protein_coding	Prpf39	ENSMUST00000120580	ENSMUST00000129956	protein_coding	nonsense_mediated_decay	TRUE	TRUE	upstream_gene_variant=3;5_prime_UTR_variant=1;intron_variant=196;feature_elongation=24;feature_truncation=18;synonymous_variant=2;3_prime_UTR_variant=9	upstream_gene_variant=3;5_prime_UTR_variant=1;NMD_transcript_variant=208;intron_variant=196;feature_elongation=24;feature_truncation=18;synonymous_variant=1;3_prime_UTR_variant=10	0	0	1	0	1	27.5	26.5	12.17	14.17	0.85	0.81	0.89	0.92	cons	CONS
protein_coding	Zfp574	ENSMUST00000179556	ENSMUST00000053410	protein_coding	protein_coding	TRUE	FALSE	upstream_gene_variant=1;intron_variant=12;feature_elongation=6;feature_truncation=3;missense_variant=1;synonymous_variant=9;3_prime_UTR_variant=9;downstream_gene_variant=2	upstream_gene_variant=1;5_prime_UTR_variant=2;intron_variant=10;feature_elongation=6;feature_truncation=3;missense_variant=1;synonymous_variant=9;3_prime_UTR_variant=9;downstream_gene_variant=2	0	0	1	0	1	33.33	27.17	13	6	0.83	0.83	0.86	0.62	NA	CIS
processed_transcript	Gm12992	ENSMUST00000124738	ENSMUST00000132111	processed_transcript	processed_transcript	TRUE	NA	downstream_gene_variant=1;non_coding_exon_variant=27;nc_transcript_variant=204;feature_truncation=14;feature_elongation=16;intron_variant=177	downstream_gene_variant=69;non_coding_exon_variant=21;nc_transcript_variant=59;feature_truncation=5;intron_variant=38;feature_elongation=3;upstream_gene_variant=30	1	1	0	0	0	1	28.17	13.5	8.25	0.92	0.86	0.93	0.97	cons	Not in Dataset
protein_coding	Zfp661	ENSMUST00000110366	ENSMUST00000110368	protein_coding	protein_coding	TRUE	FALSE	downstream_gene_variant=1;3_prime_UTR_variant=45;feature_elongation=9;feature_truncation=14;missense_variant=3;synonymous_variant=1;intron_variant=84;5_prime_UTR_variant=15;upstream_gene_variant=2	downstream_gene_variant=22;3_prime_UTR_variant=24;feature_truncation=11;feature_elongation=4;missense_variant=3;synonymous_variant=1;intron_variant=68;5_prime_UTR_variant=7;upstream_gene_variant=26	1	0	0	1	1	3.67	10.17	0.5	2.92	0.31	0.31	0.75	0.68	cis	CONS
protein_coding	Rhbg	ENSMUST00000171887	ENSMUST00000163277	protein_coding	processed_transcript	TRUE	NA	downstream_gene_variant=5;3_prime_UTR_variant=1;missense_variant=4;intron_variant=116;feature_truncation=10;synonymous_variant=8;feature_elongation=8;splice_region_variant=1;5_prime_UTR_variant=2;upstream_gene_variant=47	downstream_gene_variant=22;intron_variant=434;nc_transcript_variant=443;feature_truncation=39;non_coding_exon_variant=9;feature_elongation=42;splice_region_variant=1;upstream_gene_variant=41	1	1	0	0	0	44.17	21.67	42	8.58	1	0.66	1	0.75	cis	CIS&TRANS
protein_coding	Ube2o	ENSMUST00000082152	ENSMUST00000134102	protein_coding	processed_transcript	TRUE	NA	downstream_gene_variant=1;3_prime_UTR_variant=2;missense_variant=1;synonymous_variant=10;intron_variant=345;feature_elongation=32;splice_region_variant=3;feature_truncation=26;inframe_insertion=1	downstream_gene_variant=1;non_coding_exon_variant=9;nc_transcript_variant=32;intron_variant=23;feature_elongation=2;splice_region_variant=2;upstream_gene_variant=70	1	0	0	0	1	12.33	23.67	9.75	7	0.57	0.72	1	0.68	NA	CONS
protein_coding	Arhgef16	ENSMUST00000030898	ENSMUST00000144145	protein_coding	retained_intron	TRUE	NA	downstream_gene_variant=1;3_prime_UTR_variant=12;feature_elongation=21;intron_variant=151;synonymous_variant=8;missense_variant=1;feature_truncation=6;upstream_gene_variant=10	downstream_gene_variant=1;non_coding_exon_variant=35;nc_transcript_variant=172;feature_elongation=21;intron_variant=137;feature_truncation=6;upstream_gene_variant=10	0	0	1	0	1	17.33	27.83	10.67	8.83	0.9	0.84	0.7	0.55	cons	CONS
protein_coding	Wdr3	ENSMUST00000052120	ENSMUST00000146989	protein_coding	nonsense_mediated_decay	TRUE	TRUE	downstream_gene_variant=2;3_prime_UTR_variant=4;missense_variant=7;splice_region_variant=4;intron_variant=217;feature_elongation=17;feature_truncation=15;synonymous_variant=12;5_prime_UTR_variant=1	downstream_gene_variant=40;3_prime_UTR_variant=24;NMD_transcript_variant=203;intron_variant=178;feature_elongation=14;feature_truncation=13;splice_region_variant=3;5_prime_UTR_variant=1	0	1	0	0	1	33.17	32.5	19.5	12.75	0.99	0.97	0.94	0.97	cons	CIS
protein_coding	Fbxl18	ENSMUST00000110766	ENSMUST00000156725	protein_coding	retained_intron	TRUE	NA	3_prime_UTR_variant=75;feature_elongation=26;feature_truncation=21;intron_variant=266;synonymous_variant=14;missense_variant=2;5_prime_UTR_variant=5;upstream_gene_variant=1	downstream_gene_variant=90;non_coding_exon_variant=55;nc_transcript_variant=132;feature_elongation=8;feature_truncation=11;intron_variant=77;upstream_gene_variant=1	0	1	0	0	0	16.17	30.5	11.5	10.75	0.95	0.91	0.95	0.9	cons	CONS
protein_coding	Trex1	ENSMUST00000061973	ENSMUST00000112053	protein_coding	protein_coding	TRUE	FALSE	missense_variant=1;splice_region_variant=1;5_prime_UTR_variant=1;intron_variant=6;upstream_gene_variant=7	missense_variant=1;splice_region_variant=1;5_prime_UTR_variant=1;intron_variant=2;upstream_gene_variant=11	1	0	0	1	0	52.83	16.5	7.67	21.83	0.34	0.49	0.52	0.36	cons	CONS
protein_coding	Socs6	ENSMUST00000070116	ENSMUST00000125362	protein_coding	protein_coding	TRUE	FALSE	downstream_gene_variant=43;3_prime_UTR_variant=22;feature_truncation=8;feature_elongation=13;synonymous_variant=1;intron_variant=116;5_prime_UTR_variant=2;upstream_gene_variant=37	downstream_gene_variant=33;3_prime_UTR_variant=2;feature_truncation=6;synonymous_variant=1;intron_variant=115;feature_elongation=11;5_prime_UTR_variant=3;upstream_gene_variant=37	0	0	1	1	1	10	14.5	5.92	8.25	0.59	0.43	0.56	0.47	cons	CIS&TRANS
protein_coding	Smad7	ENSMUST00000026999	ENSMUST00000168918	protein_coding	protein_coding	TRUE	FALSE	5_prime_UTR_variant=2;feature_elongation=42;intron_variant=267;feature_truncation=28;synonymous_variant=1;3_prime_UTR_variant=15;downstream_gene_variant=1	upstream_gene_variant=2;intron_variant=281;feature_elongation=41;feature_truncation=28;synonymous_variant=1;3_prime_UTR_variant=1;downstream_gene_variant=1	0	0	1	1	1	31.83	26	20.58	14	1	0.77	0.89	0.89	NA	Not in Dataset
protein_coding	Fam193a	ENSMUST00000180376	ENSMUST00000181379	protein_coding	protein_coding	TRUE	TRUE	intron_variant=571;feature_elongation=71;feature_truncation=74;synonymous_variant=4;3_prime_UTR_variant=1;downstream_gene_variant=1	upstream_gene_variant=17;intron_variant=49;feature_elongation=4;feature_truncation=6;3_prime_UTR_variant=6;downstream_gene_variant=26	1	1	0	0	0	28	28.83	11.25	13.67	0.89	0.85	0.89	0.88	cons	CONS
protein_coding	Slc22a26	ENSMUST00000120522	ENSMUST00000065634	protein_coding	protein_coding	TRUE	TRUE	downstream_gene_variant=2;3_prime_UTR_variant=6;feature_elongation=21;intron_variant=185;feature_truncation=14;synonymous_variant=2;missense_variant=9;upstream_gene_variant=2	downstream_gene_variant=8;intron_variant=185;feature_elongation=18;feature_truncation=14;synonymous_variant=2;missense_variant=9;splice_region_variant=2;upstream_gene_variant=2	0	0	1	1	1	0.83	23.17	0.08	69.5	1	0.68	0	0.68	NA	Not in Dataset
protein_coding	Zbtb5	ENSMUST00000055028	ENSMUST00000107817	protein_coding	protein_coding	TRUE	FALSE	downstream_gene_variant=4;3_prime_UTR_variant=13;feature_truncation=14;synonymous_variant=8;missense_variant=1;intron_variant=145;feature_elongation=16	downstream_gene_variant=16;3_prime_UTR_variant=1;synonymous_variant=8;missense_variant=1;intron_variant=140;feature_truncation=13;feature_elongation=16;5_prime_UTR_variant=5	0	0	1	1	1	13.83	29	6.25	5.42	0.91	0.85	0.89	0.8	cons	CONS
protein_coding	Dcbld2	ENSMUST00000046663	ENSMUST00000134324	protein_coding	retained_intron	TRUE	NA	upstream_gene_variant=1;intron_variant=682;feature_elongation=49;feature_truncation=50;synonymous_variant=11;splice_region_variant=3;missense_variant=5;3_prime_UTR_variant=61;downstream_gene_variant=44	upstream_gene_variant=86;splice_region_variant=1;intron_variant=95;nc_transcript_variant=118;feature_truncation=11;feature_elongation=4;non_coding_exon_variant=23;downstream_gene_variant=75	1	1	0	0	0	5.67	10.67	1.67	3.25	0.38	0.31	0.82	0.66	cons	CONS
protein_coding	Rhbdf2	ENSMUST00000103029	ENSMUST00000126819	protein_coding	retained_intron	TRUE	NA	3_prime_UTR_variant=6;feature_truncation=19;intron_variant=244;synonymous_variant=5;splice_region_variant=3;feature_elongation=21;5_prime_UTR_variant=3;upstream_gene_variant=28	downstream_gene_variant=47;non_coding_exon_variant=13;nc_transcript_variant=211;feature_truncation=13;intron_variant=198;feature_elongation=18;splice_region_variant=1;upstream_gene_variant=28	0	1	1	0	1	31.83	31.33	23.08	10.08	0.86	0.91	0.83	0.93	cons	CIS&TRANS
protein_coding	Agfg1	ENSMUST00000113444	ENSMUST00000063380	protein_coding	protein_coding	TRUE	TRUE	5_prime_UTR_variant=2;feature_elongation=62;synonymous_variant=12;intron_variant=517;feature_truncation=50;splice_region_variant=1;missense_variant=1;3_prime_UTR_variant=7	5_prime_UTR_variant=2;feature_elongation=62;synonymous_variant=12;intron_variant=517;feature_truncation=50;splice_region_variant=1;missense_variant=1;3_prime_UTR_variant=7	0	0	0	0	1	23	28.67	11	6.25	0.77	0.83	0.92	0.78	NA	CONS
protein_coding	Tmc6	ENSMUST00000026659	ENSMUST00000149589	protein_coding	nonsense_mediated_decay	TRUE	TRUE	downstream_gene_variant=1;3_prime_UTR_variant=2;missense_variant=3;intron_variant=82;feature_elongation=9;feature_truncation=6;splice_region_variant=2;5_prime_UTR_variant=2;upstream_gene_variant=9	downstream_gene_variant=22;3_prime_UTR_variant=3;NMD_transcript_variant=17;feature_elongation=3;intron_variant=14;feature_truncation=1;upstream_gene_variant=34	1	1	0	0	1	30	33.17	17.42	16.5	0.87	0.96	0.95	0.9	cons	CONS
protein_coding	Arhgap12	ENSMUST00000077128	ENSMUST00000062584	protein_coding	protein_coding	TRUE	TRUE	3_prime_UTR_variant=7;feature_truncation=50;synonymous_variant=4;missense_variant=1;intron_variant=586;feature_elongation=72;5_prime_UTR_variant=5;upstream_gene_variant=1	downstream_gene_variant=5;3_prime_UTR_variant=2;synonymous_variant=5;missense_variant=1;intron_variant=585;feature_truncation=49;feature_elongation=72;splice_region_variant=1;5_prime_UTR_variant=5;upstream_gene_variant=1	0	0	0	1	1	33.67	27.5	20.58	12.42	0.93	0.79	0.82	0.8	NA	CONS
protein_coding	Kremen1	ENSMUST00000020662	ENSMUST00000151978	protein_coding	protein_coding	TRUE	TRUE	downstream_gene_variant=4;3_prime_UTR_variant=23;feature_truncation=62;synonymous_variant=4;intron_variant=768;feature_elongation=64;missense_variant=1;upstream_gene_variant=1	downstream_gene_variant=58;3_prime_UTR_variant=43;feature_elongation=28;feature_truncation=30;intron_variant=382;upstream_gene_variant=47	1	1	0	0	0	24.83	32.83	21.33	14.92	0.98	0.94	0.98	0.97	NA	CONS
protein_coding	Naa25	ENSMUST00000042163	ENSMUST00000131598	protein_coding	retained_intron	TRUE	NA	intron_variant=317;feature_truncation=31;feature_elongation=31;splice_region_variant=3;synonymous_variant=4;missense_variant=2;3_prime_UTR_variant=13;downstream_gene_variant=20	intron_variant=182;nc_transcript_variant=209;feature_truncation=24;feature_elongation=21;splice_region_variant=1;non_coding_exon_variant=27;downstream_gene_variant=35	0	1	1	0	0	25.83	32.83	10.42	16.67	0.97	0.94	0.98	0.98	cons	CIS
protein_coding	Mycbp2	ENSMUST00000161008	ENSMUST00000160758	protein_coding	protein_coding	TRUE	TRUE	downstream_gene_variant=1;3_prime_UTR_variant=1;synonymous_variant=21;intron_variant=356;feature_truncation=32;feature_elongation=34;splice_region_variant=4;missense_variant=3;upstream_gene_variant=28	downstream_gene_variant=1;3_prime_UTR_variant=1;synonymous_variant=41;intron_variant=1550;feature_truncation=112;feature_elongation=130;splice_region_variant=8;missense_variant=5;upstream_gene_variant=2	1	0	0	0	1	24.17	26.67	13.33	9.25	0.99	0.76	0.86	0.73	trans	CONS
pseudogene	Pisd-ps2	ENSMUST00000142526	ENSMUST00000127960	unprocessed_pseudogene	lincRNA	TRUE	NA	downstream_gene_variant=1;intron_variant=16;nc_transcript_variant=22;non_coding_exon_variant=6;feature_truncation=2;splice_region_variant=1;feature_elongation=1;upstream_gene_variant=21	downstream_gene_variant=9;non_coding_exon_variant=11;nc_transcript_variant=35;feature_truncation=4;splice_region_variant=2;intron_variant=24;feature_elongation=4	1	1	0	0	1	29	11	15.33	1.75	0.1	0.31	0.07	0.17	NA	Not in Dataset
protein_coding	Maff	ENSMUST00000096350	ENSMUST00000163691	protein_coding	protein_coding	TRUE	FALSE	upstream_gene_variant=1;5_prime_UTR_variant=3;intron_variant=73;feature_truncation=3;feature_elongation=4;synonymous_variant=1;3_prime_UTR_variant=5;downstream_gene_variant=1	upstream_gene_variant=6;intron_variant=71;feature_truncation=3;feature_elongation=4;synonymous_variant=1;3_prime_UTR_variant=5;downstream_gene_variant=1	1	0	0	0	0	2.5	11	2.75	7.5	0.49	0.31	0.5	0.78	cons	Not in Dataset
antisense	Gm11423	ENSMUST00000152784	ENSMUST00000136051	antisense	antisense	TRUE	NA	non_coding_exon_variant=10;nc_transcript_variant=19;intron_variant=9;feature_elongation=4;splice_region_variant=1;upstream_gene_variant=1	downstream_gene_variant=1;non_coding_exon_variant=11;nc_transcript_variant=18;feature_elongation=4;intron_variant=7;splice_region_variant=1;upstream_gene_variant=1	0	0	0	1	1	12.67	27.83	4.33	12.75	0.49	0.78	0.66	0.7	NA	Not in Dataset
protein_coding	Epm2aip1	ENSMUST00000060711	ENSMUST00000135807	protein_coding	nonsense_mediated_decay	TRUE	FALSE	upstream_gene_variant=2;synonymous_variant=5;3_prime_UTR_variant=34;feature_elongation=4;feature_truncation=3	upstream_gene_variant=2;synonymous_variant=5;NMD_transcript_variant=39;3_prime_UTR_variant=18;intron_variant=16;feature_elongation=4;feature_truncation=3	0	0	1	0	1	22	29.83	12.83	11.42	0.77	0.83	0.94	0.75	cons	CONS
protein_coding	Dmtf1	ENSMUST00000071921	ENSMUST00000095017	protein_coding	protein_coding	TRUE	TRUE	downstream_gene_variant=7;3_prime_UTR_variant=8;feature_elongation=35;feature_truncation=29;synonymous_variant=7;intron_variant=289;splice_region_variant=1;missense_variant=1;5_prime_UTR_variant=1;upstream_gene_variant=2	downstream_gene_variant=10;3_prime_UTR_variant=5;feature_elongation=34;feature_truncation=28;synonymous_variant=7;intron_variant=289;splice_region_variant=1;missense_variant=1;5_prime_UTR_variant=1;upstream_gene_variant=2	0	0	1	1	1	13.17	25.17	4.67	4.08	0.52	0.7	0.27	0.5	cons	CIS&TRANS
protein_coding	Lmnb2	ENSMUST00000179022	ENSMUST00000105332	protein_coding	protein_coding	TRUE	TRUE	downstream_gene_variant=3;3_prime_UTR_variant=4;intron_variant=96;feature_truncation=9;missense_variant=5;feature_elongation=5;synonymous_variant=3	downstream_gene_variant=7;intron_variant=12;feature_truncation=3;missense_variant=5;feature_elongation=2;inframe_deletion=1;5_prime_UTR_variant=2;upstream_gene_variant=26	1	0	0	1	0	27.17	29.67	11.42	7.67	0.98	0.82	0.96	0.83	cons	CONS
protein_coding	Hcfc2	ENSMUST00000020478	ENSMUST00000160681	protein_coding	protein_coding	TRUE	TRUE	upstream_gene_variant=22;5_prime_UTR_variant=1;synonymous_variant=11;intron_variant=385;feature_elongation=35;feature_truncation=31;missense_variant=3;3_prime_UTR_variant=12	upstream_gene_variant=53;intron_variant=86;feature_elongation=9;feature_truncation=5;synonymous_variant=9;missense_variant=2;3_prime_UTR_variant=13;downstream_gene_variant=12	1	0	0	1	1	14.67	18.17	7.75	6.75	0.46	0.5	0.47	0.4	cons	CONS
protein_coding	Armc10	ENSMUST00000072896	ENSMUST00000095495	protein_coding	protein_coding	TRUE	TRUE	upstream_gene_variant=3;5_prime_UTR_variant=5;intron_variant=200;feature_truncation=22;feature_elongation=10;missense_variant=1;synonymous_variant=3;splice_region_variant=2;3_prime_UTR_variant=37;downstream_gene_variant=6	upstream_gene_variant=6;5_prime_UTR_variant=2;intron_variant=183;feature_truncation=21;feature_elongation=10;missense_variant=1;synonymous_variant=2;splice_region_variant=2;3_prime_UTR_variant=52;downstream_gene_variant=9	0	0	1	1	1	31.33	33.83	11.25	18.5	0.98	0.93	0.98	0.95	cons	CONS
protein_coding	Nif3l1	ENSMUST00000087521	ENSMUST00000171597	protein_coding	protein_coding	TRUE	FALSE	upstream_gene_variant=1;5_prime_UTR_variant=3;intron_variant=110;splice_region_variant=1;feature_elongation=8;feature_truncation=16;synonymous_variant=1;3_prime_UTR_variant=13;downstream_gene_variant=54	upstream_gene_variant=13;5_prime_UTR_variant=2;intron_variant=99;feature_elongation=8;feature_truncation=16;synonymous_variant=1;3_prime_UTR_variant=13;downstream_gene_variant=54	1	0	0	1	0	36.17	22.67	12.08	10.58	0.68	0.62	0.81	0.68	cons	CONS
protein_coding	Tnrc18	ENSMUST00000152247	ENSMUST00000151477	protein_coding	protein_coding	TRUE	TRUE	synonymous_variant=16;missense_variant=3;intron_variant=421;feature_truncation=38;feature_elongation=40;splice_region_variant=2;upstream_gene_variant=35	downstream_gene_variant=43;3_prime_UTR_variant=6;feature_truncation=62;feature_elongation=63;intron_variant=636;missense_variant=2;synonymous_variant=15;splice_region_variant=2;5_prime_UTR_variant=1;upstream_gene_variant=2	1	1	0	0	0	10.83	29.33	12.25	10	0.48	0.8	0.69	0.69	NA	CONS
protein_coding	Pja2	ENSMUST00000172818	ENSMUST00000172733	protein_coding	protein_coding	TRUE	TRUE	downstream_gene_variant=2;3_prime_UTR_variant=10;feature_elongation=47;intron_variant=519;feature_truncation=45;splice_region_variant=1;synonymous_variant=10;missense_variant=2;upstream_gene_variant=4	downstream_gene_variant=2;3_prime_UTR_variant=10;feature_elongation=47;intron_variant=519;feature_truncation=45;splice_region_variant=1;synonymous_variant=10;missense_variant=2;upstream_gene_variant=4	0	0	1	1	1	11.83	12.5	2.5	1.83	0.4	0.34	0.7	0.48	cons	CONS
protein_coding	Vwa5a	ENSMUST00000001544	ENSMUST00000118144	protein_coding	protein_coding	TRUE	FALSE	upstream_gene_variant=1;5_prime_UTR_variant=5;splice_region_variant=5;intron_variant=322;feature_elongation=17;feature_truncation=21;missense_variant=16;synonymous_variant=11;3_prime_UTR_variant=36;downstream_gene_variant=5	upstream_gene_variant=1;5_prime_UTR_variant=3;splice_region_variant=5;intron_variant=324;feature_elongation=17;feature_truncation=21;missense_variant=16;synonymous_variant=11;3_prime_UTR_variant=17;downstream_gene_variant=24	0	0	1	1	1	28.83	34.33	9.67	19.5	0.43	0.93	0.51	1	cis	CONS
protein_coding	Syngr1	ENSMUST00000009728	ENSMUST00000009727	protein_coding	protein_coding	TRUE	TRUE	intron_variant=219;feature_elongation=12;feature_truncation=20;missense_variant=1;stop_gained=1;3_prime_UTR_variant=1;downstream_gene_variant=43	intron_variant=243;feature_elongation=18;feature_truncation=22;3_prime_UTR_variant=29;downstream_gene_variant=3	0	1	1	0	0	0.67	20	0.42	10.5	0.42	0.54	0	0.61	cons	CIS
protein_coding	Ostm1	ENSMUST00000040718	ENSMUST00000154048	protein_coding	retained_intron	TRUE	NA	upstream_gene_variant=111;5_prime_UTR_variant=2;synonymous_variant=3;intron_variant=344;feature_truncation=31;feature_elongation=30;missense_variant=1;splice_region_variant=1;3_prime_UTR_variant=17;downstream_gene_variant=1	upstream_gene_variant=113;non_coding_exon_variant=35;nc_transcript_variant=337;intron_variant=302;feature_truncation=28;feature_elongation=25;downstream_gene_variant=29	0	1	1	0	0	35.67	36.33	19.58	13.42	0.98	0.98	0.96	0.99	cons	CIS&TRANS
protein_coding	Nab2	ENSMUST00000026469	ENSMUST00000099157	protein_coding	protein_coding	TRUE	TRUE	missense_variant=1;intron_variant=16;feature_elongation=4;splice_region_variant=2;feature_truncation=4;synonymous_variant=2;upstream_gene_variant=10	missense_variant=1;intron_variant=16;feature_elongation=4;splice_region_variant=2;feature_truncation=4;synonymous_variant=2;upstream_gene_variant=10	0	0	1	1	1	41.33	31.17	30	12.58	0.58	0.84	0.94	0.66	NA	CIS
protein_coding	Slc12a9	ENSMUST00000039991	ENSMUST00000149847	protein_coding	retained_intron	TRUE	NA	3_prime_UTR_variant=1;synonymous_variant=11;intron_variant=169;feature_truncation=18;feature_elongation=19;splice_region_variant=1;missense_variant=1;5_prime_UTR_variant=1;upstream_gene_variant=1	downstream_gene_variant=59;non_coding_exon_variant=16;nc_transcript_variant=32;feature_elongation=3;feature_truncation=3;intron_variant=16;upstream_gene_variant=1	0	1	0	0	0	41.67	36.83	27.75	20.5	0.99	0.99	0.99	0.98	cons	CIS&TRANS
protein_coding	Ncam2	ENSMUST00000037785	ENSMUST00000067602	protein_coding	protein_coding	TRUE	TRUE	intron_variant=4813;feature_elongation=318;feature_truncation=262;synonymous_variant=6;splice_region_variant=2;3_prime_UTR_variant=18;downstream_gene_variant=48	intron_variant=5184;feature_elongation=337;feature_truncation=275;synonymous_variant=5;splice_region_variant=2;3_prime_UTR_variant=7	0	1	0	0	0	3.33	1.5	1.33	1.33	0.11	0.04	0.29	0.28	cons	Not in Dataset
protein_coding	Etv6	ENSMUST00000081028	ENSMUST00000111963	protein_coding	protein_coding	TRUE	TRUE	5_prime_UTR_variant=3;feature_truncation=211;intron_variant=3084;feature_elongation=238;splice_region_variant=1;synonymous_variant=1;3_prime_UTR_variant=28;downstream_gene_variant=1	5_prime_UTR_variant=3;feature_truncation=211;intron_variant=3084;feature_elongation=238;splice_region_variant=1;synonymous_variant=1;3_prime_UTR_variant=28;downstream_gene_variant=1	0	0	0	0	1	23.17	19.5	1.58	2.5	0.81	0.52	0.67	0.6	NA	CIS
protein_coding	Zmym5	ENSMUST00000039812	ENSMUST00000173954	protein_coding	protein_coding	TRUE	FALSE	downstream_gene_variant=1;3_prime_UTR_variant=20;feature_elongation=18;feature_truncation=17;synonymous_variant=4;splice_region_variant=2;intron_variant=142;missense_variant=1;5_prime_UTR_variant=1	downstream_gene_variant=16;3_prime_UTR_variant=5;feature_elongation=17;feature_truncation=15;synonymous_variant=4;splice_region_variant=2;intron_variant=141;missense_variant=1;5_prime_UTR_variant=2	1	0	0	1	1	14.17	19.5	2.75	9.92	0.25	0.52	0.39	0.31	NA	CONS
protein_coding	Zfp692	ENSMUST00000153510	ENSMUST00000049353	protein_coding	protein_coding	TRUE	FALSE	5_prime_UTR_variant=1;intron_variant=17;feature_elongation=3;synonymous_variant=3;missense_variant=3	5_prime_UTR_variant=1;intron_variant=17;feature_elongation=3;synonymous_variant=3;missense_variant=3	0	0	1	1	1	23	18.83	7.5	8.17	0.61	0.5	0.57	0.62	NA	CONS
protein_coding	Smcr8	ENSMUST00000056907	ENSMUST00000102667	protein_coding	protein_coding	TRUE	TRUE	upstream_gene_variant=43;5_prime_UTR_variant=4;synonymous_variant=3;missense_variant=3;intron_variant=19;feature_truncation=3;3_prime_UTR_variant=23;feature_elongation=4	upstream_gene_variant=43;5_prime_UTR_variant=4;synonymous_variant=2;missense_variant=3;3_prime_UTR_variant=3;downstream_gene_variant=25	0	1	0	0	1	24.83	34.17	14.08	9.83	0.9	0.9	0.89	0.91	cons	CONS
protein_coding	Tmem63a	ENSMUST00000027800	ENSMUST00000161942	protein_coding	retained_intron	TRUE	NA	upstream_gene_variant=12;5_prime_UTR_variant=3;intron_variant=394;feature_truncation=27;feature_elongation=31;synonymous_variant=16;splice_region_variant=2;3_prime_UTR_variant=13;downstream_gene_variant=81	upstream_gene_variant=66;non_coding_exon_variant=8;nc_transcript_variant=12;feature_elongation=1;intron_variant=4;downstream_gene_variant=77	1	1	0	0	0	53.5	38.17	18.25	12.42	0.97	1	0.93	0.73	cons	CONS
protein_coding	Adal	ENSMUST00000028702	ENSMUST00000066155	protein_coding	protein_coding	TRUE	TRUE	upstream_gene_variant=23;5_prime_UTR_variant=3;intron_variant=111;feature_truncation=13;feature_elongation=10;missense_variant=2;splice_region_variant=1;synonymous_variant=1;3_prime_UTR_variant=3;downstream_gene_variant=9	upstream_gene_variant=25;intron_variant=106;feature_elongation=10;feature_truncation=11;missense_variant=2;splice_region_variant=1;synonymous_variant=1;3_prime_UTR_variant=3;downstream_gene_variant=9	1	0	0	1	1	17.83	13.83	3.67	2.17	0.32	0.36	0.67	0.47	cons	CONS
protein_coding	Smarcal1	ENSMUST00000047615	ENSMUST00000150725	protein_coding	retained_intron	TRUE	NA	upstream_gene_variant=1;intron_variant=782;feature_elongation=44;synonymous_variant=8;missense_variant=2;feature_truncation=32;downstream_gene_variant=3	upstream_gene_variant=26;non_coding_exon_variant=43;nc_transcript_variant=724;intron_variant=681;feature_truncation=32;feature_elongation=43;downstream_gene_variant=38	1	1	0	0	1	34.83	37.33	8.92	6.67	0.98	0.97	0.86	0.72	cons	CONS
protein_coding	Plekha8	ENSMUST00000119706	ENSMUST00000101385	protein_coding	protein_coding	TRUE	TRUE	upstream_gene_variant=38;5_prime_UTR_variant=5;feature_truncation=29;intron_variant=281;feature_elongation=32;synonymous_variant=8;splice_region_variant=1;3_prime_UTR_variant=40	upstream_gene_variant=49;5_prime_UTR_variant=1;intron_variant=189;feature_truncation=19;feature_elongation=18;synonymous_variant=8;splice_region_variant=1;downstream_gene_variant=40	1	0	0	1	0	46.67	27.33	17	10.92	0.31	0.71	0.6	0.69	trans	CIS
protein_coding	Ccdc59	ENSMUST00000020049	ENSMUST00000133538	protein_coding	retained_intron	TRUE	NA	upstream_gene_variant=2;5_prime_UTR_variant=3;missense_variant=3;intron_variant=62;feature_truncation=5;feature_elongation=6;inframe_deletion=1;synonymous_variant=2;splice_region_variant=1;3_prime_UTR_variant=4;downstream_gene_variant=3	upstream_gene_variant=2;non_coding_exon_variant=40;nc_transcript_variant=75;intron_variant=35;feature_truncation=6;feature_elongation=6;splice_region_variant=1;downstream_gene_variant=3	0	0	0	0	1	36.33	31.67	19.92	25.42	0.79	0.82	0.75	0.92	cis	CONS
protein_coding	Mtf1	ENSMUST00000030723	ENSMUST00000147452	protein_coding	retained_intron	TRUE	NA	upstream_gene_variant=3;intron_variant=434;feature_elongation=39;feature_truncation=35;synonymous_variant=5;missense_variant=1;splice_region_variant=1;3_prime_UTR_variant=27	upstream_gene_variant=3;intron_variant=20;nc_transcript_variant=23;feature_elongation=5;feature_truncation=2;non_coding_exon_variant=3;downstream_gene_variant=46	0	1	1	0	0	18.67	21.67	6.83	6.25	0.27	0.56	0.55	0.52	NA	CONS
pseudogene	BC021767	ENSMUST00000136988	ENSMUST00000126387	processed_transcript	unprocessed_pseudogene	TRUE	NA	downstream_gene_variant=3;intron_variant=17;nc_transcript_variant=21;non_coding_exon_variant=4;feature_elongation=1;feature_truncation=1;upstream_gene_variant=41	downstream_gene_variant=3;intron_variant=48;nc_transcript_variant=61;non_coding_exon_variant=12;feature_elongation=2;feature_truncation=4;splice_region_variant=1;splice_acceptor_variant=1;upstream_gene_variant=1	1	0	0	1	0	4.33	25.17	5.08	3.67	0.34	0.65	0	0.61	NA	Not in Dataset
protein_coding	Med27	ENSMUST00000028139	ENSMUST00000113830	protein_coding	protein_coding	TRUE	TRUE	upstream_gene_variant=2;intron_variant=1783;feature_truncation=134;feature_elongation=125;splice_region_variant=1;3_prime_UTR_variant=2;downstream_gene_variant=2	upstream_gene_variant=2;intron_variant=1273;feature_truncation=96;feature_elongation=93;3_prime_UTR_variant=17;downstream_gene_variant=63	0	1	1	0	0	42.5	36.83	14.67	14.83	0.96	0.95	0.96	0.85	cons	CONS
protein_coding	Entpd6	ENSMUST00000094467	ENSMUST00000147223	protein_coding	retained_intron	TRUE	NA	upstream_gene_variant=1;5_prime_UTR_variant=6;feature_truncation=12;intron_variant=320;feature_elongation=17;synonymous_variant=6;splice_region_variant=1;3_prime_UTR_variant=6;downstream_gene_variant=2	upstream_gene_variant=1;non_coding_exon_variant=56;nc_transcript_variant=243;feature_truncation=7;intron_variant=187;feature_elongation=13;downstream_gene_variant=74	0	1	1	0	0	37	38	19.92	19.25	0.99	0.98	0.96	0.89	cons	Not in Dataset
non_coding	Gt(ROSA)26Sor	ENSMUST00000124246	ENSMUST00000159544	non_coding	non_coding	TRUE	NA	downstream_gene_variant=15;non_coding_exon_variant=10;nc_transcript_variant=46;feature_truncation=5;intron_variant=36;feature_elongation=2	downstream_gene_variant=20;non_coding_exon_variant=5;nc_transcript_variant=41;feature_truncation=5;intron_variant=36;feature_elongation=2	0	0	1	1	1	40.17	27.33	28.17	22.25	0.75	0.7	0.97	0.84	cons	CONS
protein_coding	Zfp238	ENSMUST00000094276	ENSMUST00000077225	protein_coding	protein_coding	TRUE	TRUE	intron_variant=11;feature_elongation=4;feature_truncation=2;3_prime_UTR_variant=2	upstream_gene_variant=5;5_prime_UTR_variant=6;feature_truncation=1;3_prime_UTR_variant=2;feature_elongation=2	1	0	0	0	1	58.33	36	27.92	9.17	0.98	0.92	0.84	0.82	NA	CONS
protein_coding	Chfr	ENSMUST00000112519	ENSMUST00000014812	protein_coding	protein_coding	TRUE	TRUE	upstream_gene_variant=1;5_prime_UTR_variant=2;intron_variant=365;synonymous_variant=7;feature_truncation=25;feature_elongation=34;missense_variant=3;splice_region_variant=3;3_prime_UTR_variant=8;downstream_gene_variant=36	upstream_gene_variant=1;5_prime_UTR_variant=2;intron_variant=365;synonymous_variant=7;feature_truncation=25;feature_elongation=34;missense_variant=3;splice_region_variant=3;3_prime_UTR_variant=8;downstream_gene_variant=36	0	0	0	0	1	30.5	27.33	6.08	9.92	0.71	0.69	0.88	0.82	cons	CONS
protein_coding	Ric8b	ENSMUST00000038523	ENSMUST00000095385	protein_coding	protein_coding	TRUE	TRUE	intron_variant=184;feature_elongation=12;feature_truncation=15;synonymous_variant=1;3_prime_UTR_variant=3	intron_variant=184;feature_elongation=12;feature_truncation=15;synonymous_variant=1;3_prime_UTR_variant=3	0	0	1	0	1	20	16.67	6.25	5.5	0.33	0.42	0.27	0.51	cons	CONS
protein_coding	Rcn3	ENSMUST00000117546	ENSMUST00000019683	protein_coding	protein_coding	TRUE	FALSE	3_prime_UTR_variant=2;intron_variant=47;feature_truncation=1;feature_elongation=3;synonymous_variant=1;splice_region_variant=1	3_prime_UTR_variant=2;intron_variant=47;feature_truncation=1;feature_elongation=3;synonymous_variant=1;splice_region_variant=1	0	0	0	0	1	25.5	16.33	0.58	4.42	0.11	0.41	0.75	0.25	NA	CONS
protein_coding	Dtwd2	ENSMUST00000163590	ENSMUST00000025383	protein_coding	protein_coding	TRUE	TRUE	3_prime_UTR_variant=9;feature_truncation=61;intron_variant=675;synonymous_variant=3;feature_elongation=51;missense_variant=4;5_prime_UTR_variant=1;upstream_gene_variant=1	downstream_gene_variant=4;3_prime_UTR_variant=5;feature_truncation=61;intron_variant=675;synonymous_variant=3;feature_elongation=51;missense_variant=4;5_prime_UTR_variant=1;upstream_gene_variant=1	0	0	0	1	1	5.33	4	1.75	2.08	0.79	0.1	0.78	0.17	cis	CONS
protein_coding	Spata22	ENSMUST00000092926	ENSMUST00000117445	protein_coding	protein_coding	TRUE	TRUE	upstream_gene_variant=2;5_prime_UTR_variant=4;intron_variant=134;feature_elongation=8;feature_truncation=15;synonymous_variant=4;splice_region_variant=1;missense_variant=2;3_prime_UTR_variant=3;downstream_gene_variant=38	upstream_gene_variant=2;5_prime_UTR_variant=4;intron_variant=194;feature_elongation=18;feature_truncation=20;synonymous_variant=3;splice_region_variant=1;missense_variant=2;3_prime_UTR_variant=17;downstream_gene_variant=1	0	1	0	0	0	27.17	38.83	8.75	30.92	0.95	0.97	0.96	0.97	cons	CIS&TRANS
protein_coding	Pus10	ENSMUST00000109525	ENSMUST00000058163	protein_coding	protein_coding	TRUE	FALSE	upstream_gene_variant=1;intron_variant=701;feature_elongation=53;feature_truncation=59;missense_variant=2;synonymous_variant=6;splice_region_variant=3;3_prime_UTR_variant=3	upstream_gene_variant=5;5_prime_UTR_variant=5;intron_variant=692;feature_elongation=53;feature_truncation=59;missense_variant=2;synonymous_variant=6;splice_region_variant=3;3_prime_UTR_variant=3	1	0	0	0	1	16.67	32.83	9.17	9.42	0.4	0.82	0.54	0.46	cons	CONS
protein_coding	Raet1e	ENSMUST00000181645	ENSMUST00000065527	protein_coding	protein_coding	TRUE	FALSE	intron_variant=37;feature_elongation=7;feature_truncation=1;missense_variant=2;3_prime_UTR_variant=1;downstream_gene_variant=7	upstream_gene_variant=9;intron_variant=16;feature_elongation=1;feature_truncation=1;missense_variant=2;3_prime_UTR_variant=1;downstream_gene_variant=7	1	0	0	1	0	33.83	31.83	7.33	3.33	0.17	0.79	0.45	0.38	NA	CONS
protein_coding	Bcl7a	ENSMUST00000031391	ENSMUST00000117971	protein_coding	protein_coding	TRUE	TRUE	upstream_gene_variant=27;5_prime_UTR_variant=3;feature_elongation=28;intron_variant=230;feature_truncation=18;3_prime_UTR_variant=8;downstream_gene_variant=1	upstream_gene_variant=26;5_prime_UTR_variant=3;feature_elongation=15;intron_variant=92;feature_truncation=11;3_prime_UTR_variant=42;downstream_gene_variant=50	0	1	1	0	0	28.67	33.5	16.67	12	0.95	0.83	0.91	0.88	trans	CONS
protein_coding	Slc25a21	ENSMUST00000044634	ENSMUST00000110680	protein_coding	protein_coding	TRUE	TRUE	downstream_gene_variant=1;3_prime_UTR_variant=8;feature_truncation=346;feature_elongation=364;intron_variant=5246;synonymous_variant=2	downstream_gene_variant=9;intron_variant=4771;feature_truncation=324;feature_elongation=327;synonymous_variant=3;missense_variant=1;upstream_gene_variant=94	1	0	0	1	0	33.33	32.33	15.83	26.25	0.92	0.8	0.73	0.82	NA	CONS
protein_coding	Zscan29	ENSMUST00000110661	ENSMUST00000146243	protein_coding	protein_coding	TRUE	TRUE	downstream_gene_variant=14;3_prime_UTR_variant=5;feature_elongation=3;missense_variant=2;intron_variant=14;synonymous_variant=3;upstream_gene_variant=2	downstream_gene_variant=8;3_prime_UTR_variant=4;feature_elongation=2;synonymous_variant=3;intron_variant=5;5_prime_UTR_variant=2	0	1	1	0	1	13.67	17	5.25	7.17	0.51	0.42	0.62	0.31	cons	CONS
protein_coding	Vps39	ENSMUST00000028752	ENSMUST00000145193	protein_coding	retained_intron	TRUE	NA	3_prime_UTR_variant=12;feature_elongation=27;intron_variant=424;feature_truncation=29;synonymous_variant=10;splice_region_variant=1;5_prime_UTR_variant=1	downstream_gene_variant=35;non_coding_exon_variant=48;nc_transcript_variant=48;feature_truncation=3;feature_elongation=2;upstream_gene_variant=51	1	1	0	0	0	30.83	36.5	7.42	3.83	0.97	0.9	0.84	0.73	cons	CONS
protein_coding	Zkscan5	ENSMUST00000085671	ENSMUST00000031601	protein_coding	protein_coding	TRUE	TRUE	5_prime_UTR_variant=5;synonymous_variant=8;missense_variant=8;intron_variant=216;feature_truncation=14;feature_elongation=26;3_prime_UTR_variant=3;downstream_gene_variant=1	5_prime_UTR_variant=5;synonymous_variant=8;missense_variant=8;intron_variant=216;feature_truncation=14;feature_elongation=26;3_prime_UTR_variant=3;downstream_gene_variant=1	0	0	1	0	1	15.33	40.67	6.83	5.75	0.65	1	0.55	0.52	NA	Not in Dataset
protein_coding	2310046O06Rik	ENSMUST00000114200	ENSMUST00000093833	protein_coding	protein_coding	TRUE	TRUE	missense_variant=2;intron_variant=12;synonymous_variant=1;feature_truncation=3;feature_elongation=3;3_prime_UTR_variant=21;downstream_gene_variant=4	missense_variant=2;intron_variant=12;synonymous_variant=1;feature_truncation=3;feature_elongation=3;3_prime_UTR_variant=21;downstream_gene_variant=4	0	0	0	0	1	22.5	30.17	9.25	13.17	0.74	0.74	0.64	0.7	CIS&TRANS	CONS
protein_coding	Osbpl8	ENSMUST00000105275	ENSMUST00000095310	protein_coding	protein_coding	TRUE	TRUE	5_prime_UTR_variant=2;feature_truncation=27;intron_variant=207;feature_elongation=18;synonymous_variant=2;3_prime_UTR_variant=11	5_prime_UTR_variant=2;feature_truncation=27;intron_variant=207;feature_elongation=18;synonymous_variant=2;3_prime_UTR_variant=11	0	0	0	0	1	19.67	19.33	0.83	1	0.57	0.47	0.6	0	cons	CONS
protein_coding	Dnalc4	ENSMUST00000023055	ENSMUST00000162713	protein_coding	processed_transcript	TRUE	NA	downstream_gene_variant=1;3_prime_UTR_variant=3;feature_elongation=7;synonymous_variant=1;intron_variant=99;feature_truncation=8;5_prime_UTR_variant=1;upstream_gene_variant=36	downstream_gene_variant=13;intron_variant=116;nc_transcript_variant=119;feature_truncation=8;feature_elongation=5;non_coding_exon_variant=3;upstream_gene_variant=9	1	1	0	0	1	37.17	40	19.33	19.08	0.83	0.97	0.97	0.96	NA	CONS
protein_coding	Rap2a	ENSMUST00000062117	ENSMUST00000156694	protein_coding	protein_coding	TRUE	TRUE	upstream_gene_variant=2;5_prime_UTR_variant=1;feature_truncation=19;intron_variant=282;feature_elongation=21;3_prime_UTR_variant=26	upstream_gene_variant=60;3_prime_UTR_variant=26;feature_elongation=1;feature_truncation=1	1	0	0	0	0	30.83	33	6	12.08	0.38	0.8	0.67	0.64	NA	CONS
protein_coding	Csf1r	ENSMUST00000025523	ENSMUST00000115268	protein_coding	protein_coding	TRUE	FALSE	upstream_gene_variant=1;5_prime_UTR_variant=3;intron_variant=213;feature_elongation=8;feature_truncation=23;synonymous_variant=7;missense_variant=5;3_prime_UTR_variant=2;downstream_gene_variant=4	upstream_gene_variant=3;5_prime_UTR_variant=2;intron_variant=212;feature_elongation=8;feature_truncation=23;synonymous_variant=7;missense_variant=5;3_prime_UTR_variant=5;downstream_gene_variant=1	1	0	0	1	0	63.67	27.33	13	13.75	0.96	0.66	0.75	0.66	NA	CONS
protein_coding	Slc39a3	ENSMUST00000117276	ENSMUST00000059551	protein_coding	protein_coding	TRUE	FALSE	downstream_gene_variant=1;3_prime_UTR_variant=14;intron_variant=24;synonymous_variant=1;feature_elongation=1;feature_truncation=3;5_prime_UTR_variant=1;upstream_gene_variant=1	downstream_gene_variant=1;3_prime_UTR_variant=14;intron_variant=24;synonymous_variant=1;feature_elongation=1;feature_truncation=3;5_prime_UTR_variant=1;upstream_gene_variant=1	0	0	1	1	1	19.67	31.5	12.92	20.75	0.75	0.76	0.66	0.85	cons	CONS
protein_coding	Btbd6	ENSMUST00000165079	ENSMUST00000002880	protein_coding	protein_coding	TRUE	TRUE	5_prime_UTR_variant=1;synonymous_variant=1;intron_variant=1;3_prime_UTR_variant=2	synonymous_variant=2;intron_variant=1;3_prime_UTR_variant=2	1	0	0	0	0	57.17	22.83	22	14.92	0.79	0.55	0.3	0.41	cons	CIS
protein_coding	Zc3hc1	ENSMUST00000080812	ENSMUST00000152101	protein_coding	retained_intron	TRUE	NA	downstream_gene_variant=1;3_prime_UTR_variant=1;stop_gained=1;missense_variant=2;intron_variant=202;feature_truncation=16;feature_elongation=25;synonymous_variant=2;5_prime_UTR_variant=1;upstream_gene_variant=1	downstream_gene_variant=60;non_coding_exon_variant=20;nc_transcript_variant=40;feature_elongation=6;feature_truncation=5;intron_variant=20;upstream_gene_variant=2	0	1	1	0	0	52.5	36.67	14.75	8.67	0.98	0.88	0.95	0.58	cis	CIS
protein_coding	Adora1	ENSMUST00000086465	ENSMUST00000038191	protein_coding	protein_coding	TRUE	FALSE	3_prime_UTR_variant=18;feature_truncation=25;feature_elongation=23;splice_region_variant=1;intron_variant=359;synonymous_variant=1;upstream_gene_variant=1	3_prime_UTR_variant=18;feature_truncation=25;feature_elongation=23;splice_region_variant=1;intron_variant=354;synonymous_variant=1;5_prime_UTR_variant=5;upstream_gene_variant=1	0	0	1	0	1	30.33	24	9.08	7.25	0.65	0.57	0.42	0.14	cons	CONS
protein_coding	Per1	ENSMUST00000101004	ENSMUST00000021271	protein_coding	protein_coding	TRUE	TRUE	5_prime_UTR_variant=1;intron_variant=47;feature_truncation=4;synonymous_variant=2;missense_variant=3;splice_region_variant=1;feature_elongation=3;3_prime_UTR_variant=6;downstream_gene_variant=20	upstream_gene_variant=25;intron_variant=41;synonymous_variant=7;missense_variant=3;feature_truncation=2;splice_region_variant=2;feature_elongation=5;3_prime_UTR_variant=2;downstream_gene_variant=1	1	1	0	0	0	8.83	23.17	6.5	10	0.43	0.55	0.68	0.75	cons	CONS
protein_coding	Upf2	ENSMUST00000060092	ENSMUST00000128200	protein_coding	protein_coding	TRUE	TRUE	intron_variant=867;feature_elongation=76;feature_truncation=71;synonymous_variant=13;missense_variant=2;splice_region_variant=3;3_prime_UTR_variant=1	upstream_gene_variant=50;synonymous_variant=3;intron_variant=217;feature_truncation=17;feature_elongation=14;splice_region_variant=1;3_prime_UTR_variant=1	1	0	0	1	1	22.5	25.83	8	8.75	0.34	0.61	0.83	0.66	NA	CONS
protein_coding	Smad1	ENSMUST00000066091	ENSMUST00000109885	protein_coding	protein_coding	TRUE	TRUE	downstream_gene_variant=2;3_prime_UTR_variant=15;feature_elongation=53;feature_truncation=55;intron_variant=652;synonymous_variant=3;5_prime_UTR_variant=3;upstream_gene_variant=1	downstream_gene_variant=58;3_prime_UTR_variant=21;feature_elongation=49;feature_truncation=50;intron_variant=590;synonymous_variant=3;5_prime_UTR_variant=3;upstream_gene_variant=1	0	1	0	0	0	63.67	41.5	31.33	33	0.99	0.98	0.97	0.99	cons	CONS
protein_coding	Ankrd10	ENSMUST00000033905	ENSMUST00000169782	protein_coding	protein_coding	TRUE	TRUE	downstream_gene_variant=2;3_prime_UTR_variant=2;feature_elongation=21;feature_truncation=10;synonymous_variant=4;missense_variant=3;intron_variant=164;splice_region_variant=1;5_prime_UTR_variant=1	downstream_gene_variant=18;3_prime_UTR_variant=8;synonymous_variant=2;splice_region_variant=1;intron_variant=146;feature_truncation=8;feature_elongation=18;missense_variant=1;5_prime_UTR_variant=1	0	1	0	0	0	25.5	38.67	14.83	11.83	0.96	0.91	0.97	0.82	cis	CONS
protein_coding	Ilf3	ENSMUST00000067646	ENSMUST00000115414	protein_coding	protein_coding	TRUE	TRUE	5_prime_UTR_variant=1;intron_variant=188;feature_elongation=18;feature_truncation=29;synonymous_variant=2;3_prime_UTR_variant=2;downstream_gene_variant=1	5_prime_UTR_variant=1;intron_variant=177;feature_elongation=18;feature_truncation=28;synonymous_variant=1;3_prime_UTR_variant=4;downstream_gene_variant=11	0	1	0	0	0	32.33	35.67	18.25	16.42	0.82	0.83	0.91	0.7	cons	CONS
protein_coding	Lime1	ENSMUST00000048077	ENSMUST00000124299	protein_coding	nonsense_mediated_decay	TRUE	NA	upstream_gene_variant=1;5_prime_UTR_variant=6;intron_variant=2;splice_region_variant=1;missense_variant=2;3_prime_UTR_variant=1;downstream_gene_variant=23	upstream_gene_variant=1;intron_variant=7;NMD_transcript_variant=9;nc_transcript_variant=9;non_coding_exon_variant=2;splice_region_variant=1;downstream_gene_variant=23	0	1	1	0	1	25	32	20.25	5.25	0.76	0.74	0.85	0.91	cons	Not in Dataset
protein_coding	Dock9	ENSMUST00000100299	ENSMUST00000040700	protein_coding	protein_coding	TRUE	TRUE	downstream_gene_variant=1;3_prime_UTR_variant=15;feature_truncation=243;feature_elongation=253;intron_variant=3387;splice_region_variant=13;synonymous_variant=22;missense_variant=2;5_prime_UTR_variant=2;upstream_gene_variant=3	downstream_gene_variant=1;3_prime_UTR_variant=15;feature_truncation=156;feature_elongation=137;intron_variant=2033;splice_region_variant=13;synonymous_variant=21;missense_variant=2;upstream_gene_variant=52	1	0	0	0	1	10.5	15.17	3.08	4.17	0.08	0.35	0.22	0.41	NA	CONS
protein_coding	Zfp866	ENSMUST00000131784	ENSMUST00000137573	protein_coding	protein_coding	TRUE	TRUE	3_prime_UTR_variant=12;feature_truncation=19;feature_elongation=36;missense_variant=1;synonymous_variant=1;intron_variant=239;splice_region_variant=1;upstream_gene_variant=1	downstream_gene_variant=14;3_prime_UTR_variant=5;synonymous_variant=4;intron_variant=79;splice_region_variant=1;feature_elongation=19;feature_truncation=8;5_prime_UTR_variant=2;upstream_gene_variant=60	1	1	0	0	0	23.33	28.67	12.83	11.25	0.77	0.66	0.68	0.75	cons	CONS
protein_coding	1810012P15Rik	ENSMUST00000147875	ENSMUST00000141321	protein_coding	protein_coding	TRUE	TRUE	intron_variant=118;feature_elongation=16;feature_truncation=11;synonymous_variant=2;3_prime_UTR_variant=97	intron_variant=106;feature_elongation=11;feature_truncation=6;synonymous_variant=2;downstream_gene_variant=69	0	1	1	0	0	32	20	43.17	28.33	0.31	0.46	0.27	0.37	cons	Not in Dataset
protein_coding	Tbc1d2b	ENSMUST00000041767	ENSMUST00000128874	protein_coding	retained_intron	TRUE	NA	3_prime_UTR_variant=28;feature_elongation=51;feature_truncation=50;intron_variant=683;splice_region_variant=4;synonymous_variant=8;missense_variant=3	downstream_gene_variant=51;non_coding_exon_variant=43;nc_transcript_variant=319;feature_elongation=23;feature_truncation=28;intron_variant=276	0	1	1	0	0	35.17	42	28	15.33	0.96	0.96	0.96	0.98	cons	CIS&TRANS
lincRNA	Gm16157	ENSMUST00000135564	ENSMUST00000124813	lincRNA	lincRNA	TRUE	NA	non_coding_exon_variant=6;nc_transcript_variant=129;intron_variant=123;feature_elongation=16;feature_truncation=6;splice_region_variant=1;upstream_gene_variant=25	downstream_gene_variant=4;intron_variant=146;nc_transcript_variant=150;feature_elongation=17;feature_truncation=8;splice_region_variant=3;non_coding_exon_variant=4	1	0	0	1	0	69.17	43	42.67	33.58	0.77	0.98	0.59	1	cis	Not in Dataset
protein_coding	Wdr86	ENSMUST00000068693	ENSMUST00000142607	protein_coding	retained_intron	TRUE	NA	downstream_gene_variant=5;3_prime_UTR_variant=13;synonymous_variant=3;missense_variant=2;intron_variant=161;feature_truncation=15;feature_elongation=18	downstream_gene_variant=12;non_coding_exon_variant=26;nc_transcript_variant=172;feature_truncation=15;feature_elongation=18;intron_variant=146	0	0	1	1	1	1.33	23	0.08	25.67	0.72	0.52	0.5	0.61	cons	CIS&TRANS
protein_coding	Wdr33	ENSMUST00000025264	ENSMUST00000082319	protein_coding	protein_coding	TRUE	TRUE	upstream_gene_variant=2;intron_variant=898;feature_elongation=94;feature_truncation=77;synonymous_variant=13;splice_region_variant=2;missense_variant=2;3_prime_UTR_variant=25;downstream_gene_variant=1	upstream_gene_variant=2;intron_variant=209;feature_elongation=31;feature_truncation=19;synonymous_variant=1;3_prime_UTR_variant=1;downstream_gene_variant=41	0	1	0	0	0	33.5	35.17	17.83	22.17	0.55	0.78	0.82	0.92	cons	CONS
protein_coding	Xpc	ENSMUST00000032182	ENSMUST00000150279	protein_coding	retained_intron	TRUE	NA	downstream_gene_variant=1;3_prime_UTR_variant=5;feature_elongation=18;intron_variant=282;synonymous_variant=10;splice_region_variant=1;feature_truncation=28;missense_variant=8;5_prime_UTR_variant=2;upstream_gene_variant=1	downstream_gene_variant=9;non_coding_exon_variant=47;nc_transcript_variant=299;splice_region_variant=1;intron_variant=252;feature_elongation=16;feature_truncation=28;upstream_gene_variant=1	0	1	0	0	1	46.67	43.5	22	22.67	0.99	0.96	0.98	0.99	NA	CONS
protein_coding	Mrc1	ENSMUST00000028045	ENSMUST00000146168	protein_coding	processed_transcript	TRUE	NA	5_prime_UTR_variant=1;missense_variant=4;intron_variant=1373;feature_elongation=91;feature_truncation=76;synonymous_variant=14;splice_region_variant=3;3_prime_UTR_variant=11;downstream_gene_variant=4	upstream_gene_variant=91;intron_variant=46;nc_transcript_variant=62;non_coding_exon_variant=16;downstream_gene_variant=21	1	1	0	0	0	41.67	43.17	13.5	20.33	0.93	0.95	0.97	0.95	cons	CIS&TRANS
protein_coding	Mark2	ENSMUST00000032557	ENSMUST00000171352	protein_coding	protein_coding	TRUE	TRUE	downstream_gene_variant=1;3_prime_UTR_variant=3;feature_truncation=42;synonymous_variant=3;intron_variant=404;feature_elongation=48;upstream_gene_variant=1	downstream_gene_variant=8;3_prime_UTR_variant=7;feature_truncation=2;intron_variant=9;feature_elongation=4;synonymous_variant=1;upstream_gene_variant=32	1	1	0	0	0	44.5	33.83	22.75	12.42	0.82	0.74	0.85	0.81	cons	CIS
protein_coding	Lin7a	ENSMUST00000020057	ENSMUST00000105280	protein_coding	protein_coding	TRUE	TRUE	synonymous_variant=6;intron_variant=1812;feature_truncation=107;feature_elongation=141;3_prime_UTR_variant=50;downstream_gene_variant=2	5_prime_UTR_variant=2;intron_variant=1813;feature_truncation=107;feature_elongation=141;synonymous_variant=3;3_prime_UTR_variant=50;downstream_gene_variant=2	0	0	0	0	1	32	43	11.42	17.25	0.93	0.94	0.81	0.95	cons	CIS
protein_coding	Nav2	ENSMUST00000064395	ENSMUST00000064383	protein_coding	protein_coding	TRUE	TRUE	5_prime_UTR_variant=3;intron_variant=4568;feature_truncation=265;feature_elongation=381;splice_region_variant=9;synonymous_variant=35;missense_variant=4;3_prime_UTR_variant=15;downstream_gene_variant=1	upstream_gene_variant=93;5_prime_UTR_variant=4;missense_variant=3;intron_variant=1016;feature_elongation=100;feature_truncation=56;synonymous_variant=6;3_prime_UTR_variant=19;downstream_gene_variant=104	1	1	0	0	0	51.5	45	35.33	25.42	0.99	0.98	0.99	0.99	cons	CONS
protein_coding	Fhod1	ENSMUST00000132777	ENSMUST00000014922	retained_intron	protein_coding	TRUE	NA	intron_variant=144;nc_transcript_variant=163;non_coding_exon_variant=19;feature_truncation=16;splice_region_variant=4;feature_elongation=15	intron_variant=149;missense_variant=2;synonymous_variant=12;feature_truncation=16;splice_region_variant=5;feature_elongation=15	0	0	1	0	1	13.33	11.5	4.42	5.33	0.28	0.25	0.27	0.35	cons	CONS
protein_coding	Necab1	ENSMUST00000041606	ENSMUST00000108273	protein_coding	protein_coding	TRUE	FALSE	3_prime_UTR_variant=46;feature_truncation=119;feature_elongation=103;intron_variant=1835;splice_region_variant=2;missense_variant=1;5_prime_UTR_variant=1	downstream_gene_variant=33;3_prime_UTR_variant=13;feature_truncation=117;feature_elongation=102;intron_variant=1835;splice_region_variant=2;missense_variant=1;5_prime_UTR_variant=1	1	0	0	1	0	80.67	42.33	52.67	20.92	0.96	0.92	0.94	0.8	NA	CIS
protein_coding	Megf8	ENSMUST00000128119	ENSMUST00000153077	protein_coding	retained_intron	TRUE	NA	upstream_gene_variant=1;5_prime_UTR_variant=5;intron_variant=441;feature_elongation=24;feature_truncation=35;synonymous_variant=27;splice_region_variant=6;missense_variant=1;3_prime_UTR_variant=15	upstream_gene_variant=76;non_coding_exon_variant=32;nc_transcript_variant=219;splice_region_variant=4;intron_variant=187;feature_elongation=3;feature_truncation=17	1	0	0	1	0	12.17	27.17	7.42	10.75	0.4	0.59	0.61	0.69	NA	CIS&TRANS
protein_coding	Dcaf10	ENSMUST00000155551	ENSMUST00000107798	protein_coding	processed_transcript	TRUE	NA	missense_variant=1;intron_variant=253;feature_truncation=23;feature_elongation=26;synonymous_variant=1;3_prime_UTR_variant=40	non_coding_exon_variant=3;nc_transcript_variant=256;intron_variant=253;feature_truncation=17;feature_elongation=24;downstream_gene_variant=39	0	0	1	1	1	24.67	24	11.75	10.75	0.73	0.52	0.89	0.79	NA	Not in Dataset
protein_coding	Metrn	ENSMUST00000165838	ENSMUST00000002344	protein_coding	protein_coding	TRUE	FALSE	downstream_gene_variant=1;3_prime_UTR_variant=3;feature_elongation=2;synonymous_variant=1;intron_variant=4;feature_truncation=1;missense_variant=1	downstream_gene_variant=4;synonymous_variant=1;intron_variant=4;feature_truncation=1;missense_variant=1	1	0	0	1	0	13	29.17	6.58	15.25	0.87	0.63	0.47	0.52	NA	CONS
protein_coding	Ppard	ENSMUST00000002320	ENSMUST00000123020	protein_coding	retained_intron	TRUE	NA	upstream_gene_variant=1;intron_variant=744;feature_elongation=53;feature_truncation=59;splice_region_variant=1;5_prime_UTR_variant=2;synonymous_variant=4;3_prime_UTR_variant=16	upstream_gene_variant=1;intron_variant=682;nc_transcript_variant=705;feature_elongation=47;feature_truncation=54;splice_region_variant=1;non_coding_exon_variant=23;downstream_gene_variant=60	0	1	1	0	0	30.67	44	14.5	13.75	0.97	0.95	0.95	0.97	cons	CONS
lincRNA	AC153860.1	ENSMUST00000181355	ENSMUST00000181064	lincRNA	lincRNA	TRUE	NA	non_coding_exon_variant=15;nc_transcript_variant=28;feature_elongation=4;intron_variant=13;feature_truncation=1;splice_region_variant=1;upstream_gene_variant=38	downstream_gene_variant=22;non_coding_exon_variant=20;nc_transcript_variant=44;feature_elongation=9;intron_variant=24;feature_truncation=4	1	1	0	0	0	24.17	42.83	10.33	28.58	0.88	0.92	0.86	0.95	NA	CIS
protein_coding	Slc15a4	ENSMUST00000031367	ENSMUST00000153832	protein_coding	nonsense_mediated_decay	TRUE	TRUE	downstream_gene_variant=4;3_prime_UTR_variant=5;synonymous_variant=5;intron_variant=107;feature_elongation=6;missense_variant=2;feature_truncation=3;upstream_gene_variant=70	downstream_gene_variant=4;3_prime_UTR_variant=7;NMD_transcript_variant=119;intron_variant=107;feature_elongation=6;missense_variant=1;feature_truncation=3;synonymous_variant=4;upstream_gene_variant=70	0	0	1	1	1	51	46.67	10.42	4.58	0.92	1	0.67	0.88	cons	CIS
protein_coding	Trmt61a	ENSMUST00000084947	ENSMUST00000168338	protein_coding	protein_coding	TRUE	FALSE	upstream_gene_variant=3;5_prime_UTR_variant=4;feature_elongation=3;synonymous_variant=2;intron_variant=42;feature_truncation=3;missense_variant=1;splice_region_variant=1;3_prime_UTR_variant=3	upstream_gene_variant=3;5_prime_UTR_variant=4;feature_elongation=3;synonymous_variant=2;intron_variant=42;feature_truncation=3;missense_variant=1;splice_region_variant=1;3_prime_UTR_variant=3	0	0	0	0	1	8	21.5	6.42	12.5	0.55	0.46	0.76	0.21	CIS&TRANS	Not in Dataset
protein_coding	Fam168a	ENSMUST00000107042	ENSMUST00000049053	protein_coding	protein_coding	TRUE	FALSE	intron_variant=1377;feature_elongation=127;feature_truncation=102;synonymous_variant=3;3_prime_UTR_variant=14;downstream_gene_variant=2	intron_variant=1377;feature_elongation=127;feature_truncation=102;synonymous_variant=3;3_prime_UTR_variant=16	0	0	1	1	1	20	32.83	11.67	10.75	0.52	0.7	0.16	0.59	NA	CIS
protein_coding	Camsap3	ENSMUST00000057028	ENSMUST00000171962	protein_coding	protein_coding	TRUE	TRUE	upstream_gene_variant=3;5_prime_UTR_variant=4;intron_variant=131;feature_truncation=10;feature_elongation=8;synonymous_variant=6;splice_region_variant=2;missense_variant=2	upstream_gene_variant=3;5_prime_UTR_variant=4;intron_variant=131;feature_truncation=10;feature_elongation=8;synonymous_variant=6;splice_region_variant=2;missense_variant=2	0	0	0	0	1	27.33	37.67	11.17	17.67	0.63	0.8	0.5	0.83	NA	Not in Dataset
protein_coding	Gimap6	ENSMUST00000053661	ENSMUST00000119315	protein_coding	protein_coding	TRUE	TRUE	3_prime_UTR_variant=7;synonymous_variant=4;intron_variant=45;feature_elongation=5;feature_truncation=3;missense_variant=1;5_prime_UTR_variant=2;upstream_gene_variant=4	3_prime_UTR_variant=25;feature_elongation=5;feature_truncation=3;synonymous_variant=1;intron_variant=30;missense_variant=1;5_prime_UTR_variant=1;upstream_gene_variant=5	0	0	1	1	1	39	41	13.17	12.83	0.94	0.87	0.94	0.81	NA	CONS
protein_coding	Mertk	ENSMUST00000014505	ENSMUST00000140221	protein_coding	processed_transcript	TRUE	NA	upstream_gene_variant=1;intron_variant=498;feature_elongation=44;feature_truncation=43;synonymous_variant=6;missense_variant=2;splice_region_variant=2;3_prime_UTR_variant=4	upstream_gene_variant=34;intron_variant=143;nc_transcript_variant=152;feature_elongation=12;feature_truncation=13;non_coding_exon_variant=9	1	0	0	1	1	15.67	28.83	10.67	11.83	0.63	0.61	0.72	0.68	cons	CONS
protein_coding	Slu7	ENSMUST00000151880	ENSMUST00000020681	protein_coding	protein_coding	TRUE	TRUE	5_prime_UTR_variant=1;intron_variant=154;feature_elongation=9;synonymous_variant=6;feature_truncation=12;missense_variant=4;splice_region_variant=1;downstream_gene_variant=44	5_prime_UTR_variant=1;intron_variant=173;feature_elongation=9;synonymous_variant=8;feature_truncation=15;missense_variant=4;splice_region_variant=2;3_prime_UTR_variant=19;downstream_gene_variant=4	0	1	1	0	1	42.83	26	13.25	7.17	0.18	0.55	0.2	0.51	cis	Not in Dataset
protein_coding	Rnd3	ENSMUST00000017288	ENSMUST00000154545	protein_coding	protein_coding	TRUE	TRUE	downstream_gene_variant=1;3_prime_UTR_variant=10;feature_elongation=22;intron_variant=128;feature_truncation=8;synonymous_variant=1;5_prime_UTR_variant=1	downstream_gene_variant=8;3_prime_UTR_variant=23;feature_truncation=8;feature_elongation=21;missense_variant=1;synonymous_variant=1;intron_variant=107;5_prime_UTR_variant=1	0	0	1	1	1	47	46.33	25	24.75	1	0.98	0.99	0.99	NA	CONS
protein_coding	Fzd7	ENSMUST00000114246	ENSMUST00000037105	protein_coding	protein_coding	TRUE	FALSE	5_prime_UTR_variant=2;synonymous_variant=2;3_prime_UTR_variant=14;feature_truncation=4;downstream_gene_variant=1	intron_variant=1;5_prime_UTR_variant=1;synonymous_variant=2;3_prime_UTR_variant=14;feature_truncation=4;downstream_gene_variant=1	0	0	1	0	1	24.83	34.5	16.75	12.58	0.43	0.71	0.82	0.59	NA	CONS
protein_coding	Gba2	ENSMUST00000128403	ENSMUST00000030189	retained_intron	protein_coding	TRUE	NA	downstream_gene_variant=35;non_coding_exon_variant=19;nc_transcript_variant=110;intron_variant=91;feature_truncation=3;feature_elongation=6;upstream_gene_variant=8	downstream_gene_variant=35;3_prime_UTR_variant=1;intron_variant=100;synonymous_variant=10;splice_region_variant=2;feature_truncation=3;feature_elongation=6;5_prime_UTR_variant=5;upstream_gene_variant=2	0	0	1	0	1	19.67	17.5	12.17	1.08	0.27	0.36	0.35	0.49	cons	CIS&TRANS
protein_coding	Mllt6	ENSMUST00000044730	ENSMUST00000107586	protein_coding	protein_coding	TRUE	TRUE	intron_variant=97;feature_elongation=15;feature_truncation=13;inframe_deletion=1;missense_variant=5;synonymous_variant=5;splice_region_variant=1;3_prime_UTR_variant=27;downstream_gene_variant=1	intron_variant=96;feature_elongation=15;feature_truncation=13;inframe_deletion=1;missense_variant=5;synonymous_variant=6;splice_region_variant=1;3_prime_UTR_variant=27;downstream_gene_variant=1	0	0	1	0	1	28.33	30.67	14	6.33	0.85	0.63	0.89	0.54	cons	CONS
protein_coding	Pik3c2g	ENSMUST00000111868	ENSMUST00000087657	protein_coding	protein_coding	TRUE	TRUE	upstream_gene_variant=3;missense_variant=8;synonymous_variant=11;intron_variant=3504;feature_elongation=224;feature_truncation=196;downstream_gene_variant=45	upstream_gene_variant=76;intron_variant=2015;synonymous_variant=8;feature_elongation=124;feature_truncation=123;missense_variant=5;3_prime_UTR_variant=43;downstream_gene_variant=2	1	0	0	1	0	9	20	7.67	11.25	0.09	0.41	0.18	0.32	trans	CIS
protein_coding	Smarcc1	ENSMUST00000088716	ENSMUST00000111969	protein_coding	protein_coding	TRUE	TRUE	intron_variant=811;feature_truncation=81;feature_elongation=92;synonymous_variant=9;3_prime_UTR_variant=24	intron_variant=776;feature_truncation=74;feature_elongation=83;synonymous_variant=9;downstream_gene_variant=59	0	1	0	0	0	36.5	35.17	11.08	17.17	0.79	0.72	0.67	0.86	cons	CONS
protein_coding	Fbrsl1	ENSMUST00000069483	ENSMUST00000056124	protein_coding	protein_coding	TRUE	TRUE	3_prime_UTR_variant=2;missense_variant=1;synonymous_variant=4;intron_variant=711;feature_truncation=45;feature_elongation=57;inframe_insertion=1;5_prime_UTR_variant=1	3_prime_UTR_variant=2;missense_variant=1;synonymous_variant=3;intron_variant=151;feature_truncation=9;feature_elongation=17;inframe_insertion=1;upstream_gene_variant=27	1	0	0	0	1	29.67	42.67	20.92	21	0.81	0.87	0.86	0.78	cons	CONS
protein_coding	Timp3	ENSMUST00000020234	ENSMUST00000151134	protein_coding	processed_transcript	TRUE	NA	intron_variant=491;feature_elongation=44;feature_truncation=32;synonymous_variant=1;3_prime_UTR_variant=30	intron_variant=28;nc_transcript_variant=56;feature_elongation=8;feature_truncation=3;non_coding_exon_variant=28;downstream_gene_variant=91	0	1	1	0	0	35.5	48.67	23.33	15	1	0.99	0.99	0.99	NA	CONS
protein_coding	Prmt10	ENSMUST00000056237	ENSMUST00000142824	protein_coding	retained_intron	TRUE	NA	5_prime_UTR_variant=3;feature_elongation=27;intron_variant=368;feature_truncation=29;missense_variant=2;synonymous_variant=3;downstream_gene_variant=1	non_coding_exon_variant=50;nc_transcript_variant=155;feature_elongation=13;intron_variant=105;feature_truncation=11;downstream_gene_variant=86	0	1	1	0	0	36.17	47.83	3.83	11.58	0.97	0.97	0.72	0.84	cons	CONS
protein_coding	Nom1	ENSMUST00000001611	ENSMUST00000146347	protein_coding	retained_intron	TRUE	NA	upstream_gene_variant=1;synonymous_variant=5;splice_region_variant=3;intron_variant=190;feature_elongation=10;feature_truncation=17;missense_variant=1;3_prime_UTR_variant=15;downstream_gene_variant=1	upstream_gene_variant=54;intron_variant=78;nc_transcript_variant=79;splice_region_variant=1;non_coding_exon_variant=1;feature_truncation=7;feature_elongation=5;downstream_gene_variant=59	1	1	0	0	0	29.67	36.5	19.25	13.33	0.7	0.74	0.98	0.78	NA	CONS
protein_coding	Ntmt1	ENSMUST00000041830	ENSMUST00000126037	protein_coding	processed_transcript	TRUE	NA	upstream_gene_variant=3;5_prime_UTR_variant=1;intron_variant=179;feature_truncation=15;feature_elongation=15;3_prime_UTR_variant=7;downstream_gene_variant=3	upstream_gene_variant=3;non_coding_exon_variant=4;nc_transcript_variant=79;intron_variant=75;feature_truncation=6;feature_elongation=9;downstream_gene_variant=91	0	1	1	0	1	23.67	46	4.75	8.83	0.82	0.93	0.6	0.53	cons	Not in Dataset
protein_coding	Rbm18	ENSMUST00000028251	ENSMUST00000142809	protein_coding	retained_intron	TRUE	NA	3_prime_UTR_variant=4;intron_variant=119;feature_truncation=14;feature_elongation=8;synonymous_variant=1;upstream_gene_variant=21	downstream_gene_variant=36;non_coding_exon_variant=14;nc_transcript_variant=54;feature_truncation=7;intron_variant=40;feature_elongation=6;upstream_gene_variant=19	0	1	1	0	1	51.83	48	25.33	25.83	0.99	0.97	0.97	0.98	cons	CONS
protein_coding	Sap30bp	ENSMUST00000140991	ENSMUST00000021101	protein_coding	processed_transcript	TRUE	NA	upstream_gene_variant=2;5_prime_UTR_variant=3;intron_variant=239;feature_elongation=18;feature_truncation=21;synonymous_variant=5;3_prime_UTR_variant=11;downstream_gene_variant=1	upstream_gene_variant=5;intron_variant=239;nc_transcript_variant=248;feature_elongation=18;feature_truncation=20;non_coding_exon_variant=9;downstream_gene_variant=8	0	0	1	1	1	30.33	33.17	15.58	21	0.61	0.67	0.65	0.9	cons	CONS
protein_coding	Slco1a4	ENSMUST00000165990	ENSMUST00000163678	protein_coding	protein_coding	TRUE	TRUE	downstream_gene_variant=2;3_prime_UTR_variant=11;feature_elongation=42;feature_truncation=44;synonymous_variant=3;intron_variant=641;splice_region_variant=6;missense_variant=4;5_prime_UTR_variant=6	downstream_gene_variant=34;intron_variant=308;feature_truncation=22;feature_elongation=24;splice_region_variant=2;synonymous_variant=1;5_prime_UTR_variant=3	0	1	1	0	1	44.17	42.67	40.17	33.67	0.88	0.86	0.87	0.89	cons	CIS
protein_coding	Rbm14	ENSMUST00000006625	ENSMUST00000113793	protein_coding	protein_coding	TRUE	TRUE	intron_variant=91;feature_truncation=15;synonymous_variant=4;feature_elongation=11	3_prime_UTR_variant=5;feature_truncation=15;missense_variant=1;frameshift_variant=1;synonymous_variant=4;intron_variant=84;feature_elongation=11	0	0	1	1	1	37.33	33.83	9	21.25	0.77	0.68	0.4	0.65	cons	CONS
protein_coding	Ptpn2	ENSMUST00000025420	ENSMUST00000122412	protein_coding	protein_coding	TRUE	TRUE	downstream_gene_variant=1;intron_variant=400;feature_truncation=40;feature_elongation=45;splice_region_variant=1;5_prime_UTR_variant=1	downstream_gene_variant=45;3_prime_UTR_variant=3;intron_variant=351;feature_elongation=37;feature_truncation=35;splice_region_variant=1;5_prime_UTR_variant=1	0	1	1	0	0	43.5	44.17	7.08	12.08	0.92	0.88	0.51	0.59	cons	CONS
protein_coding	Nt5dc1	ENSMUST00000047885	ENSMUST00000105512	protein_coding	protein_coding	TRUE	TRUE	downstream_gene_variant=60;3_prime_UTR_variant=15;feature_elongation=100;feature_truncation=94;intron_variant=1441;synonymous_variant=5;splice_region_variant=1;missense_variant=3;5_prime_UTR_variant=9;upstream_gene_variant=2	downstream_gene_variant=60;3_prime_UTR_variant=15;feature_elongation=100;feature_truncation=94;intron_variant=1441;synonymous_variant=5;splice_region_variant=1;missense_variant=3;5_prime_UTR_variant=7;upstream_gene_variant=4	0	0	1	0	1	40	34.67	8.08	6.83	0.87	0.69	0.83	0.67	NA	CONS
protein_coding	Zbtb17	ENSMUST00000006377	ENSMUST00000142020	protein_coding	processed_transcript	TRUE	NA	intron_variant=154;feature_elongation=10;feature_truncation=15;5_prime_UTR_variant=3;synonymous_variant=4;missense_variant=1;downstream_gene_variant=8	intron_variant=154;nc_transcript_variant=162;feature_elongation=10;feature_truncation=15;non_coding_exon_variant=8;downstream_gene_variant=8	0	0	1	0	1	30.83	47.83	23.92	16.42	0.89	0.95	0.9	0.82	cons	CONS
protein_coding	Rnf215	ENSMUST00000003677	ENSMUST00000127165	protein_coding	processed_transcript	TRUE	NA	synonymous_variant=3;intron_variant=44;feature_truncation=5;feature_elongation=3;3_prime_UTR_variant=8;downstream_gene_variant=34	upstream_gene_variant=1;intron_variant=3;nc_transcript_variant=9;feature_truncation=1;non_coding_exon_variant=6;downstream_gene_variant=58	0	1	1	0	0	48.83	41.67	35.25	19.83	0.9	0.82	0.88	0.83	cons	CIS&TRANS
protein_coding	Scaf4	ENSMUST00000163419	ENSMUST00000039280	protein_coding	protein_coding	TRUE	TRUE	downstream_gene_variant=1;3_prime_UTR_variant=2;feature_elongation=55;missense_variant=2;synonymous_variant=7;intron_variant=337;feature_truncation=31;splice_region_variant=1	downstream_gene_variant=3;missense_variant=3;synonymous_variant=7;intron_variant=336;feature_elongation=54;feature_truncation=31;splice_region_variant=2	0	0	1	1	1	29.67	26	15.25	9.08	0.64	0.51	0.41	0.43	cons	Not in Dataset
protein_coding	Efha2	ENSMUST00000068999	ENSMUST00000136835	protein_coding	protein_coding	TRUE	TRUE	5_prime_UTR_variant=8;feature_truncation=57;feature_elongation=52;missense_variant=3;synonymous_variant=4;intron_variant=655;downstream_gene_variant=1	upstream_gene_variant=35;intron_variant=176;feature_truncation=16;feature_elongation=7;synonymous_variant=2;3_prime_UTR_variant=1	1	0	0	1	1	6.5	5.67	2	3.17	0.05	0.11	0.28	0.44	cons	CONS
protein_coding	Dnajb5	ENSMUST00000142332	ENSMUST00000107973	processed_transcript	protein_coding	TRUE	NA	upstream_gene_variant=1;non_coding_exon_variant=26;nc_transcript_variant=44;feature_elongation=6;intron_variant=18;feature_truncation=2;downstream_gene_variant=19	upstream_gene_variant=18;synonymous_variant=3;intron_variant=18;feature_elongation=2;feature_truncation=2;3_prime_UTR_variant=6;downstream_gene_variant=19	0	0	1	1	0	21.17	16.5	4.08	7.25	0.06	0.32	0.41	0.25	cons	CONS
protein_coding	Pex1	ENSMUST00000121291	ENSMUST00000143959	protein_coding	retained_intron	TRUE	NA	intron_variant=350;feature_truncation=31;feature_elongation=31;missense_variant=6;synonymous_variant=8;splice_region_variant=1	upstream_gene_variant=46;non_coding_exon_variant=51;nc_transcript_variant=92;intron_variant=41;feature_elongation=4;feature_truncation=6;downstream_gene_variant=92	1	1	0	0	0	43.67	50.17	8.75	18.33	0.99	0.97	0.97	0.99	cons	CONS
protein_coding	Tgfbr2	ENSMUST00000061101	ENSMUST00000035014	protein_coding	protein_coding	TRUE	TRUE	3_prime_UTR_variant=1;intron_variant=184;synonymous_variant=3;feature_elongation=20;feature_truncation=14;5_prime_UTR_variant=2;upstream_gene_variant=2	3_prime_UTR_variant=1;intron_variant=184;synonymous_variant=3;feature_elongation=20;feature_truncation=14;5_prime_UTR_variant=2;upstream_gene_variant=2	0	0	0	0	1	32.5	15	9.58	0.17	0.3	0.29	0.33	0.5	cons	CIS&TRANS
protein_coding	Pdcl	ENSMUST00000009174	ENSMUST00000112940	protein_coding	protein_coding	TRUE	FALSE	3_prime_UTR_variant=14;feature_truncation=5;intron_variant=46;feature_elongation=4;splice_region_variant=1;missense_variant=1	downstream_gene_variant=5;3_prime_UTR_variant=9;intron_variant=38;feature_elongation=4;splice_region_variant=1;feature_truncation=4;missense_variant=1;5_prime_UTR_variant=8	0	0	1	1	1	60	49.67	23.58	33.17	0.98	0.96	0.9	0.9	cons	CONS
protein_coding	Eif3j1	ENSMUST00000028668	ENSMUST00000142747	protein_coding	processed_transcript	TRUE	NA	upstream_gene_variant=4;intron_variant=124;feature_elongation=15;feature_truncation=16;3_prime_UTR_variant=5	upstream_gene_variant=4;non_coding_exon_variant=2;nc_transcript_variant=2;downstream_gene_variant=36	0	1	1	0	0	53.17	37.33	14.92	40	0.96	0.72	0.76	0.84	NA	Not in Dataset
protein_coding	Sh2b3	ENSMUST00000136960	ENSMUST00000086310	nonsense_mediated_decay	protein_coding	TRUE	TRUE	downstream_gene_variant=2;3_prime_UTR_variant=4;NMD_transcript_variant=136;intron_variant=130;feature_truncation=12;feature_elongation=12;missense_variant=1;synonymous_variant=1	downstream_gene_variant=3;3_prime_UTR_variant=1;missense_variant=2;synonymous_variant=2;intron_variant=130;feature_truncation=12;feature_elongation=12	0	0	1	1	1	19	28	8	6.17	0.47	0.54	0.67	0.53	cons	CONS
protein_coding	Esam	ENSMUST00000002011	ENSMUST00000131832	protein_coding	retained_intron	TRUE	NA	5_prime_UTR_variant=1;intron_variant=56;feature_truncation=8;feature_elongation=2;missense_variant=1;synonymous_variant=2;3_prime_UTR_variant=4;downstream_gene_variant=4	upstream_gene_variant=41;non_coding_exon_variant=6;nc_transcript_variant=12;intron_variant=6;feature_truncation=1;downstream_gene_variant=9	1	0	0	1	0	44.67	45.67	16.75	19.25	0.96	0.88	0.86	0.96	NA	Not in Dataset
protein_coding	Bace1	ENSMUST00000034591	ENSMUST00000159970	protein_coding	retained_intron	TRUE	NA	5_prime_UTR_variant=1;feature_truncation=10;synonymous_variant=1;intron_variant=221;feature_elongation=18;splice_region_variant=1;3_prime_UTR_variant=30	upstream_gene_variant=60;non_coding_exon_variant=11;nc_transcript_variant=66;intron_variant=55;feature_truncation=3;feature_elongation=5;splice_region_variant=1;downstream_gene_variant=21	1	0	0	1	1	28	42.17	15.08	19.5	0.88	0.81	0.9	0.96	cons	CONS
protein_coding	Prpf18	ENSMUST00000035721	ENSMUST00000153881	protein_coding	processed_transcript	TRUE	NA	downstream_gene_variant=1;3_prime_UTR_variant=16;feature_elongation=22;feature_truncation=23;intron_variant=227;synonymous_variant=3;5_prime_UTR_variant=3	downstream_gene_variant=16;non_coding_exon_variant=34;nc_transcript_variant=234;intron_variant=200;feature_elongation=21;feature_truncation=21	0	0	1	1	1	68.67	49	32.75	17.17	0.97	0.94	0.97	0.95	cons	CONS
protein_coding	Kras	ENSMUST00000032399	ENSMUST00000111710	protein_coding	protein_coding	TRUE	TRUE	downstream_gene_variant=1;3_prime_UTR_variant=39;feature_truncation=16;feature_elongation=25;intron_variant=176;synonymous_variant=1	downstream_gene_variant=37;3_prime_UTR_variant=3;feature_elongation=18;intron_variant=176;feature_truncation=13;synonymous_variant=1	0	0	1	1	1	45	35	17	18.5	0.78	0.67	0.92	0.95	cons	Not in Dataset
protein_coding	Gnb1l	ENSMUST00000167778	ENSMUST00000115600	protein_coding	nonsense_mediated_decay	TRUE	TRUE	upstream_gene_variant=4;5_prime_UTR_variant=3;intron_variant=558;feature_truncation=35;feature_elongation=47;synonymous_variant=2;3_prime_UTR_variant=25;downstream_gene_variant=2	upstream_gene_variant=7;5_prime_UTR_variant=4;NMD_transcript_variant=563;intron_variant=553;feature_truncation=32;feature_elongation=47;synonymous_variant=1;missense_variant=1;3_prime_UTR_variant=4;downstream_gene_variant=24	1	0	0	1	1	4.83	14.67	4.5	2.08	0.2	0.28	0.16	0.63	CIS&TRANS	CONS
protein_coding	2210404J11Rik	ENSMUST00000097393	ENSMUST00000040594	protein_coding	protein_coding	TRUE	TRUE	intron_variant=39;feature_truncation=5;feature_elongation=5;missense_variant=1;splice_region_variant=1;3_prime_UTR_variant=2	upstream_gene_variant=4;5_prime_UTR_variant=1;intron_variant=34;feature_elongation=5;feature_truncation=4;missense_variant=1;splice_region_variant=1;3_prime_UTR_variant=2	1	0	0	0	0	36	46.67	24.42	13.08	0.77	0.89	0.92	0.82	cons	Not in Dataset
protein_coding	Utp6	ENSMUST00000043152	ENSMUST00000131921	protein_coding	retained_intron	TRUE	NA	downstream_gene_variant=21;3_prime_UTR_variant=27;feature_elongation=30;intron_variant=336;feature_truncation=29;splice_region_variant=4;synonymous_variant=4	downstream_gene_variant=46;non_coding_exon_variant=6;nc_transcript_variant=82;intron_variant=76;feature_elongation=4;feature_truncation=8;splice_region_variant=1;upstream_gene_variant=92	1	0	0	1	0	72.5	50.5	34.67	20.75	1	0.96	0.93	0.95	NA	CIS
protein_coding	Ptdss2	ENSMUST00000026568	ENSMUST00000174706	protein_coding	retained_intron	TRUE	NA	upstream_gene_variant=30;intron_variant=229;feature_elongation=25;feature_truncation=15;synonymous_variant=1;splice_region_variant=1;missense_variant=1;3_prime_UTR_variant=5;downstream_gene_variant=13	upstream_gene_variant=30;intron_variant=211;nc_transcript_variant=224;feature_elongation=23;feature_truncation=14;non_coding_exon_variant=13;splice_region_variant=1;downstream_gene_variant=12	0	1	1	0	0	31.83	46.83	22.67	18.17	0.85	0.89	0.9	0.87	cons	Not in Dataset
protein_coding	Dst	ENSMUST00000097786	ENSMUST00000115104	protein_coding	protein_coding	TRUE	TRUE	upstream_gene_variant=1;intron_variant=4193;feature_elongation=276;feature_truncation=248;synonymous_variant=86;missense_variant=22;splice_region_variant=12;3_prime_UTR_variant=3	upstream_gene_variant=1;intron_variant=4138;feature_elongation=275;feature_truncation=247;synonymous_variant=107;missense_variant=54;splice_region_variant=13;inframe_deletion=1;inframe_insertion=1;3_prime_UTR_variant=3	0	0	0	0	1	16.17	38.5	12.83	12.83	0.7	0.73	0.76	0.74	cons	CONS
protein_coding	Snx14	ENSMUST00000165315	ENSMUST00000140439	protein_coding	retained_intron	TRUE	NA	3_prime_UTR_variant=1;intron_variant=826;feature_truncation=54;feature_elongation=60;splice_region_variant=6;synonymous_variant=9	downstream_gene_variant=1;intron_variant=329;nc_transcript_variant=341;feature_truncation=16;feature_elongation=16;splice_region_variant=3;non_coding_exon_variant=12;upstream_gene_variant=66	1	0	0	1	0	35.67	37.17	9.83	10.08	0.59	0.7	0.6	0.6	cons	CONS
protein_coding	Arfip1	ENSMUST00000098990	ENSMUST00000143514	protein_coding	protein_coding	TRUE	TRUE	3_prime_UTR_variant=5;feature_elongation=47;feature_truncation=37;intron_variant=492;synonymous_variant=1;5_prime_UTR_variant=3;upstream_gene_variant=36	downstream_gene_variant=5;intron_variant=492;feature_truncation=36;feature_elongation=46;synonymous_variant=1;5_prime_UTR_variant=3;upstream_gene_variant=37	0	0	1	1	1	57	42.5	21.67	21.83	0.85	0.8	0.76	0.86	cons	CONS
protein_coding	Shoc2	ENSMUST00000169861	ENSMUST00000025932	protein_coding	protein_coding	TRUE	FALSE	upstream_gene_variant=2;5_prime_UTR_variant=4;feature_elongation=61;intron_variant=707;feature_truncation=51;synonymous_variant=5;splice_region_variant=1;3_prime_UTR_variant=17	upstream_gene_variant=9;5_prime_UTR_variant=2;intron_variant=702;feature_elongation=60;feature_truncation=51;synonymous_variant=5;splice_region_variant=1;3_prime_UTR_variant=17	1	0	0	0	0	51.33	27.67	8.92	13.75	0.05	0.52	0.5	0.22	CIS&TRANS	CONS
protein_coding	Ankrd13a	ENSMUST00000102578	ENSMUST00000137519	protein_coding	protein_coding	TRUE	TRUE	upstream_gene_variant=1;5_prime_UTR_variant=1;intron_variant=268;feature_elongation=32;feature_truncation=25;synonymous_variant=7;3_prime_UTR_variant=4;downstream_gene_variant=10	upstream_gene_variant=30;intron_variant=195;feature_truncation=11;feature_elongation=20;synonymous_variant=6;downstream_gene_variant=23	1	1	0	0	1	41.17	43.83	19.33	23.17	0.89	0.82	0.92	0.97	cons	CONS
protein_coding	Rap1gds1	ENSMUST00000098574	ENSMUST00000029796	protein_coding	protein_coding	TRUE	TRUE	3_prime_UTR_variant=24;feature_truncation=155;feature_elongation=146;intron_variant=2204;synonymous_variant=12;missense_variant=2;splice_region_variant=1	3_prime_UTR_variant=24;feature_truncation=155;feature_elongation=146;intron_variant=2204;synonymous_variant=12;missense_variant=2;splice_region_variant=1	0	0	0	0	1	26.33	41.33	11.25	8.42	0.65	0.77	0.58	0.67	NA	CONS
protein_coding	Syce2	ENSMUST00000136026	ENSMUST00000003922	protein_coding	nonsense_mediated_decay	TRUE	TRUE	upstream_gene_variant=1;5_prime_UTR_variant=2;feature_truncation=14;intron_variant=133;feature_elongation=11;splice_region_variant=1;3_prime_UTR_variant=6	upstream_gene_variant=2;5_prime_UTR_variant=1;NMD_transcript_variant=134;intron_variant=133;feature_truncation=11;feature_elongation=10;downstream_gene_variant=6	0	0	1	1	1	3.83	18.83	3.92	25.83	0.02	0.35	0.6	0.2	NA	CIS&TRANS
protein_coding	Gna13	ENSMUST00000020930	ENSMUST00000106702	protein_coding	protein_coding	TRUE	TRUE	intron_variant=397;feature_truncation=27;synonymous_variant=1;feature_elongation=37;3_prime_UTR_variant=47;downstream_gene_variant=1	intron_variant=178;feature_truncation=14;synonymous_variant=1;feature_elongation=7;downstream_gene_variant=98	0	1	0	0	0	38.33	37.5	21.25	15.67	0.75	0.69	0.88	0.92	cons	Not in Dataset
protein_coding	Bmi1	ENSMUST00000028071	ENSMUST00000051929	protein_coding	protein_coding	TRUE	FALSE	upstream_gene_variant=1;5_prime_UTR_variant=1;intron_variant=32;feature_truncation=5;synonymous_variant=3;3_prime_UTR_variant=3	upstream_gene_variant=16;5_prime_UTR_variant=1;intron_variant=17;feature_truncation=3;synonymous_variant=3;3_prime_UTR_variant=3	1	0	0	1	0	25.33	34.33	11.58	8.17	0.57	0.63	0.58	0.67	cons	CONS
protein_coding	Mettl1	ENSMUST00000006915	ENSMUST00000135655	protein_coding	retained_intron	TRUE	NA	upstream_gene_variant=6;intron_variant=21;feature_truncation=3;splice_region_variant=1;missense_variant=2;feature_elongation=4;synonymous_variant=1;3_prime_UTR_variant=15;downstream_gene_variant=1	upstream_gene_variant=6;intron_variant=10;nc_transcript_variant=18;feature_truncation=1;splice_region_variant=1;non_coding_exon_variant=8;feature_elongation=2;downstream_gene_variant=22	0	1	1	0	0	63.17	49.83	28.83	7.75	0.93	0.91	0.91	0.84	cons	CIS&TRANS
protein_coding	Pias2	ENSMUST00000114777	ENSMUST00000114776	protein_coding	protein_coding	TRUE	TRUE	upstream_gene_variant=1;intron_variant=567;feature_truncation=64;feature_elongation=84;synonymous_variant=2;splice_region_variant=3;3_prime_UTR_variant=12	upstream_gene_variant=2;intron_variant=552;feature_truncation=59;feature_elongation=76;synonymous_variant=2;splice_region_variant=3;downstream_gene_variant=12	1	1	0	0	0	39.83	42	18	12	0.82	0.76	0.99	0.88	cons	CONS
protein_coding	Ttc4	ENSMUST00000026480	ENSMUST00000127133	protein_coding	processed_transcript	TRUE	NA	3_prime_UTR_variant=8;feature_truncation=11;feature_elongation=16;missense_variant=2;intron_variant=221;splice_region_variant=2;synonymous_variant=6;5_prime_UTR_variant=3;upstream_gene_variant=5	downstream_gene_variant=51;non_coding_exon_variant=7;nc_transcript_variant=48;intron_variant=41;feature_truncation=3;feature_elongation=2;splice_region_variant=1;upstream_gene_variant=89	1	1	0	0	0	79	49.83	41.67	15.58	0.84	0.9	0.88	1	NA	CIS
protein_coding	Bloc1s6	ENSMUST00000005954	ENSMUST00000148460	protein_coding	processed_transcript	TRUE	NA	upstream_gene_variant=1;intron_variant=76;feature_elongation=10;synonymous_variant=4;feature_truncation=7;3_prime_UTR_variant=54;downstream_gene_variant=3	upstream_gene_variant=1;intron_variant=76;nc_transcript_variant=111;feature_elongation=7;non_coding_exon_variant=35;feature_truncation=6;downstream_gene_variant=26	0	0	1	1	1	54.83	33.83	28	15.58	0.1	0.61	0.16	0.7	cis	Not in Dataset
protein_coding	Pkm	ENSMUST00000034834	ENSMUST00000163694	protein_coding	protein_coding	TRUE	TRUE	upstream_gene_variant=4;5_prime_UTR_variant=1;intron_variant=145;feature_elongation=17;feature_truncation=11;synonymous_variant=5;3_prime_UTR_variant=1;downstream_gene_variant=1	upstream_gene_variant=4;5_prime_UTR_variant=1;intron_variant=146;feature_elongation=17;feature_truncation=11;synonymous_variant=4;3_prime_UTR_variant=1;downstream_gene_variant=1	0	0	0	0	1	51.17	43.5	20.08	14.42	0.84	0.78	0.87	0.82	cons	Not in Dataset
protein_coding	Ralb	ENSMUST00000004565	ENSMUST00000156213	protein_coding	retained_intron	TRUE	NA	3_prime_UTR_variant=7;feature_elongation=39;feature_truncation=41;intron_variant=384;synonymous_variant=4;splice_region_variant=1;5_prime_UTR_variant=1	downstream_gene_variant=86;non_coding_exon_variant=45;nc_transcript_variant=238;feature_elongation=19;feature_truncation=28;intron_variant=193	0	1	0	0	0	54.67	54.67	45.33	30.92	1	0.98	0.99	0.99	cons	CONS
protein_coding	Dcun1d4	ENSMUST00000063882	ENSMUST00000113558	protein_coding	protein_coding	TRUE	TRUE	upstream_gene_variant=33;intron_variant=601;feature_truncation=45;feature_elongation=61;splice_region_variant=1;3_prime_UTR_variant=15;downstream_gene_variant=1	upstream_gene_variant=33;intron_variant=601;feature_truncation=45;feature_elongation=61;splice_region_variant=1;3_prime_UTR_variant=15;downstream_gene_variant=1	0	0	1	1	1	44.67	47	18.58	11.5	0.78	0.84	0.89	0.64	cons	CONS
protein_coding	Slc35c1	ENSMUST00000067631	ENSMUST00000125276	protein_coding	protein_coding	TRUE	TRUE	downstream_gene_variant=3;3_prime_UTR_variant=18;feature_elongation=4;feature_truncation=4;synonymous_variant=3;missense_variant=1;intron_variant=59;splice_region_variant=1;5_prime_UTR_variant=3;upstream_gene_variant=2	downstream_gene_variant=3;3_prime_UTR_variant=18;feature_elongation=4;feature_truncation=5;synonymous_variant=3;missense_variant=1;intron_variant=63;splice_region_variant=1;5_prime_UTR_variant=1	1	0	0	1	0	40.5	40.5	15.08	12	0.61	0.72	0.61	0.31	cons	CIS&TRANS
lincRNA	Gm10658	ENSMUST00000128125	ENSMUST00000135527	processed_transcript	processed_transcript	TRUE	NA	non_coding_exon_variant=5;nc_transcript_variant=110;intron_variant=105;feature_elongation=17;feature_truncation=15;upstream_gene_variant=12	downstream_gene_variant=2;non_coding_exon_variant=5;nc_transcript_variant=108;feature_elongation=16;feature_truncation=15;intron_variant=103;upstream_gene_variant=13	0	1	1	0	0	60	33.83	11.58	18.33	0.23	0.6	0.4	0.79	cis	Not in Dataset
protein_coding	Pkd2	ENSMUST00000086831	ENSMUST00000133540	protein_coding	retained_intron	TRUE	NA	upstream_gene_variant=2;5_prime_UTR_variant=4;synonymous_variant=9;missense_variant=7;intron_variant=493;feature_truncation=36;feature_elongation=35;3_prime_UTR_variant=5	upstream_gene_variant=23;non_coding_exon_variant=38;nc_transcript_variant=67;feature_truncation=5;intron_variant=29;feature_elongation=1;downstream_gene_variant=27	1	1	0	0	0	21.67	52.83	14	22.17	0.94	0.93	0.95	0.95	cons	CONS
protein_coding	Pth1r	ENSMUST00000166716	ENSMUST00000006005	protein_coding	protein_coding	TRUE	FALSE	downstream_gene_variant=1;3_prime_UTR_variant=1;synonymous_variant=5;intron_variant=167;feature_elongation=17;splice_region_variant=2;feature_truncation=15;5_prime_UTR_variant=1	downstream_gene_variant=1;3_prime_UTR_variant=1;synonymous_variant=5;intron_variant=164;feature_elongation=17;splice_region_variant=2;feature_truncation=15;5_prime_UTR_variant=1;upstream_gene_variant=3	1	0	0	0	0	31.83	26.83	7.67	8.58	0.71	0.47	0.4	0.56	NA	CONS
protein_coding	Stx16	ENSMUST00000087908	ENSMUST00000044638	protein_coding	protein_coding	TRUE	TRUE	upstream_gene_variant=1;intron_variant=84;feature_truncation=10;feature_elongation=11;synonymous_variant=2;3_prime_UTR_variant=10	upstream_gene_variant=1;intron_variant=84;feature_truncation=10;feature_elongation=11;synonymous_variant=2;3_prime_UTR_variant=10	0	0	1	1	1	38.67	57.17	12.25	8.33	0.85	1	0.6	0.67	NA	CONS
protein_coding	Ccdc50	ENSMUST00000100026	ENSMUST00000039443	protein_coding	protein_coding	TRUE	TRUE	upstream_gene_variant=1;5_prime_UTR_variant=2;intron_variant=385;feature_elongation=30;feature_truncation=34;synonymous_variant=4;splice_region_variant=1;missense_variant=1;3_prime_UTR_variant=35	upstream_gene_variant=3;intron_variant=338;feature_elongation=26;feature_truncation=27;synonymous_variant=2;splice_region_variant=1;missense_variant=1;3_prime_UTR_variant=4;downstream_gene_variant=40	0	1	1	0	0	48.67	55	24.92	29.08	0.98	0.96	0.98	0.99	cons	CONS
protein_coding	5031439G07Rik	ENSMUST00000047144	ENSMUST00000124308	protein_coding	retained_intron	TRUE	NA	3_prime_UTR_variant=36;feature_elongation=26;feature_truncation=25;synonymous_variant=6;intron_variant=384;5_prime_UTR_variant=1;upstream_gene_variant=7	downstream_gene_variant=32;non_coding_exon_variant=23;nc_transcript_variant=139;intron_variant=116;feature_elongation=4;feature_truncation=4;upstream_gene_variant=46	1	0	0	1	1	54.83	49.33	27.75	30.08	0.93	0.86	0.85	0.91	cons	CIS&TRANS
protein_coding	Polr3gl	ENSMUST00000091924	ENSMUST00000141579	protein_coding	retained_intron	TRUE	NA	3_prime_UTR_variant=6;feature_elongation=11;feature_truncation=9;intron_variant=43	downstream_gene_variant=6;intron_variant=6;nc_transcript_variant=7;feature_truncation=1;feature_elongation=2;non_coding_exon_variant=1;upstream_gene_variant=10	1	0	0	1	0	66.5	38.67	26.58	21.17	0.73	0.67	0.96	0.77	cons	CONS
protein_coding	Stx12	ENSMUST00000030698	ENSMUST00000137109	protein_coding	processed_transcript	TRUE	NA	3_prime_UTR_variant=8;feature_elongation=36;intron_variant=304;feature_truncation=27;synonymous_variant=1;missense_variant=1;splice_region_variant=1;5_prime_UTR_variant=1;upstream_gene_variant=2	downstream_gene_variant=28;non_coding_exon_variant=4;nc_transcript_variant=120;intron_variant=116;feature_truncation=10;feature_elongation=16;upstream_gene_variant=51	1	1	0	0	0	62.83	56.5	17.33	29.58	0.97	0.97	0.87	0.96	cons	CONS
protein_coding	Nlrx1	ENSMUST00000168499	ENSMUST00000169651	protein_coding	protein_coding	TRUE	FALSE	3_prime_UTR_variant=3;splice_region_variant=1;intron_variant=154;feature_elongation=19;synonymous_variant=11;feature_truncation=11;missense_variant=1;5_prime_UTR_variant=1;upstream_gene_variant=1	3_prime_UTR_variant=3;splice_region_variant=1;intron_variant=149;feature_elongation=19;synonymous_variant=11;feature_truncation=11;missense_variant=1;upstream_gene_variant=7	1	0	0	0	1	12.17	31.17	0.58	5.75	0.5	0.53	0.71	0.67	NA	CIS&TRANS
protein_coding	Vasp	ENSMUST00000032561	ENSMUST00000161488	protein_coding	retained_intron	TRUE	NA	downstream_gene_variant=20;3_prime_UTR_variant=1;intron_variant=102;synonymous_variant=2;feature_truncation=11;feature_elongation=10;splice_region_variant=1;upstream_gene_variant=1	downstream_gene_variant=15;non_coding_exon_variant=3;nc_transcript_variant=3;upstream_gene_variant=43	1	0	0	1	0	79.17	51.17	39.25	25	0.95	0.87	0.85	0.89	cons	CONS
protein_coding	Ppfibp2	ENSMUST00000040056	ENSMUST00000098134	protein_coding	protein_coding	TRUE	TRUE	upstream_gene_variant=1;5_prime_UTR_variant=1;intron_variant=1742;feature_elongation=126;feature_truncation=116;synonymous_variant=12;splice_region_variant=7;3_prime_UTR_variant=3;downstream_gene_variant=45	upstream_gene_variant=41;5_prime_UTR_variant=2;intron_variant=1686;feature_elongation=123;feature_truncation=105;synonymous_variant=12;splice_region_variant=7;3_prime_UTR_variant=10;downstream_gene_variant=3	1	1	0	0	1	68.17	54.17	31.75	23.75	0.94	0.92	0.92	0.94	cons	CONS
protein_coding	Secisbp2l	ENSMUST00000053699	ENSMUST00000139944	protein_coding	protein_coding	TRUE	TRUE	downstream_gene_variant=1;3_prime_UTR_variant=7;feature_elongation=33;synonymous_variant=8;intron_variant=290;feature_truncation=26;missense_variant=1;splice_region_variant=1;5_prime_UTR_variant=1;upstream_gene_variant=1	downstream_gene_variant=23;3_prime_UTR_variant=5;feature_elongation=10;synonymous_variant=3;intron_variant=103;feature_truncation=10;missense_variant=1;splice_region_variant=1;upstream_gene_variant=38	1	1	0	0	0	69	57.33	31.75	32.33	0.99	0.97	0.97	0.98	NA	CONS
protein_coding	Pnpla6	ENSMUST00000004681	ENSMUST00000111070	protein_coding	protein_coding	TRUE	FALSE	intron_variant=170;feature_truncation=15;feature_elongation=16;synonymous_variant=12;splice_region_variant=2;3_prime_UTR_variant=1;downstream_gene_variant=4	intron_variant=170;feature_truncation=15;feature_elongation=16;synonymous_variant=12;splice_region_variant=2;3_prime_UTR_variant=1;downstream_gene_variant=4	0	0	0	0	1	22.5	25.67	2.75	2.58	0.31	0.43	0.57	0.62	NA	CONS
protein_coding	Rnf169	ENSMUST00000080817	ENSMUST00000174264	protein_coding	processed_transcript	TRUE	NA	downstream_gene_variant=2;3_prime_UTR_variant=31;feature_truncation=41;feature_elongation=46;missense_variant=3;synonymous_variant=3;intron_variant=464;splice_region_variant=1;upstream_gene_variant=1	downstream_gene_variant=27;intron_variant=286;nc_transcript_variant=287;feature_truncation=17;feature_elongation=31;non_coding_exon_variant=1;upstream_gene_variant=28	1	1	0	0	0	46.33	52.83	29.92	19.42	0.92	0.88	0.94	0.97	cons	CIS&TRANS
lincRNA	AC115727.1	ENSMUST00000180804	ENSMUST00000181070	lincRNA	lincRNA	TRUE	NA	upstream_gene_variant=1;non_coding_exon_variant=44;nc_transcript_variant=44;feature_truncation=2;feature_elongation=5;downstream_gene_variant=22	upstream_gene_variant=1;non_coding_exon_variant=53;nc_transcript_variant=64;intron_variant=11;feature_truncation=5;feature_elongation=6;downstream_gene_variant=2	0	0	1	1	1	9.67	25.83	4.25	20.75	0.32	0.43	0.38	0.39	cons	CIS&TRANS
protein_coding	Kif21a	ENSMUST00000109288	ENSMUST00000109287	protein_coding	protein_coding	TRUE	TRUE	downstream_gene_variant=3;3_prime_UTR_variant=14;feature_elongation=132;feature_truncation=102;intron_variant=1714;synonymous_variant=26;missense_variant=7;splice_region_variant=10	downstream_gene_variant=3;3_prime_UTR_variant=14;feature_elongation=132;feature_truncation=102;intron_variant=1714;synonymous_variant=25;missense_variant=8;splice_region_variant=9	0	0	0	0	1	35.17	59	10.42	23.5	0.91	0.98	0.73	0.89	cons	CONS
protein_coding	Gbas	ENSMUST00000086046	ENSMUST00000137604	protein_coding	retained_intron	TRUE	NA	intron_variant=529;feature_truncation=40;feature_elongation=53;splice_region_variant=2;synonymous_variant=3;3_prime_UTR_variant=12	upstream_gene_variant=121;non_coding_exon_variant=6;nc_transcript_variant=69;intron_variant=63;feature_truncation=4;feature_elongation=8;splice_region_variant=1;downstream_gene_variant=10	1	0	0	1	0	44	52.5	22.42	35.75	0.87	0.87	0.89	0.86	cons	CONS
protein_coding	L3mbtl3	ENSMUST00000105519	ENSMUST00000040219	protein_coding	protein_coding	TRUE	TRUE	3_prime_UTR_variant=3;intron_variant=1370;feature_truncation=105;feature_elongation=107;synonymous_variant=21;missense_variant=2;splice_region_variant=3;5_prime_UTR_variant=1;upstream_gene_variant=5	3_prime_UTR_variant=3;intron_variant=1370;feature_truncation=105;feature_elongation=107;synonymous_variant=21;missense_variant=2;splice_region_variant=3;5_prime_UTR_variant=1;upstream_gene_variant=5	0	0	0	1	1	0.83	8.5	3.42	2.33	0.8	0.14	0.4	0.33	NA	CONS
protein_coding	Rrp15	ENSMUST00000001339	ENSMUST00000162336	protein_coding	retained_intron	TRUE	NA	downstream_gene_variant=1;3_prime_UTR_variant=5;inframe_deletion=1;intron_variant=380;feature_truncation=26;feature_elongation=29;synonymous_variant=4;missense_variant=1;upstream_gene_variant=1	downstream_gene_variant=2;non_coding_exon_variant=52;nc_transcript_variant=390;feature_truncation=27;intron_variant=338;feature_elongation=29;upstream_gene_variant=1	0	0	1	1	1	57.67	59.67	28.08	37	0.99	0.98	0.99	0.99	cons	CONS
protein_coding	Mau2	ENSMUST00000050561	ENSMUST00000168013	protein_coding	protein_coding	TRUE	TRUE	downstream_gene_variant=3;3_prime_UTR_variant=18;feature_truncation=6;feature_elongation=11;intron_variant=93;synonymous_variant=2	downstream_gene_variant=3;3_prime_UTR_variant=18;feature_truncation=6;feature_elongation=11;intron_variant=93;synonymous_variant=2	0	0	1	0	1	29.67	38.67	15.92	17.33	0.68	0.63	0.54	0.86	cons	Not in Dataset
protein_coding	Erc1	ENSMUST00000032279	ENSMUST00000079582	protein_coding	protein_coding	TRUE	TRUE	downstream_gene_variant=2;3_prime_UTR_variant=30;feature_truncation=158;feature_elongation=148;synonymous_variant=6;intron_variant=1879;5_prime_UTR_variant=1;upstream_gene_variant=45	downstream_gene_variant=24;3_prime_UTR_variant=6;feature_truncation=62;feature_elongation=67;synonymous_variant=3;intron_variant=718;5_prime_UTR_variant=1	1	1	0	0	1	33.83	59.83	19.75	20	0.99	0.97	0.97	0.99	cons	CONS
protein_coding	Dut	ENSMUST00000082122	ENSMUST00000051605	protein_coding	protein_coding	TRUE	TRUE	upstream_gene_variant=2;synonymous_variant=2;inframe_insertion=1;intron_variant=163;feature_truncation=11;feature_elongation=15;3_prime_UTR_variant=1;downstream_gene_variant=7	upstream_gene_variant=4;5_prime_UTR_variant=2;intron_variant=161;feature_truncation=12;feature_elongation=16;synonymous_variant=1;3_prime_UTR_variant=7;downstream_gene_variant=1	1	0	0	1	0	53.17	47.5	24	19.33	0.82	0.77	0.76	0.59	cons	CONS
protein_coding	Ikbkap	ENSMUST00000030140	ENSMUST00000171411	protein_coding	retained_intron	TRUE	NA	3_prime_UTR_variant=12;intron_variant=578;feature_truncation=45;feature_elongation=51;missense_variant=10;synonymous_variant=13;splice_region_variant=10;inframe_deletion=1;5_prime_UTR_variant=3;upstream_gene_variant=1	downstream_gene_variant=8;non_coding_exon_variant=5;nc_transcript_variant=69;intron_variant=64;feature_truncation=4;feature_elongation=10;upstream_gene_variant=79	1	0	0	1	0	28.83	31.5	5.25	7.75	0.36	0.51	0.75	0.7	cons	CONS
protein_coding	Slc17a1	ENSMUST00000130211	ENSMUST00000110413	protein_coding	protein_coding	TRUE	TRUE	upstream_gene_variant=1;5_prime_UTR_variant=6;feature_truncation=4;intron_variant=48;feature_elongation=4;downstream_gene_variant=87	upstream_gene_variant=28;intron_variant=323;feature_truncation=26;feature_elongation=30;synonymous_variant=5;missense_variant=1;splice_region_variant=5;3_prime_UTR_variant=4;downstream_gene_variant=21	1	1	0	0	0	41	19.17	25.17	4.5	0.48	0.31	0.76	0.85	cis	CIS
protein_coding	Epha2	ENSMUST00000006614	ENSMUST00000149002	protein_coding	processed_transcript	TRUE	NA	5_prime_UTR_variant=1;feature_truncation=16;intron_variant=293;feature_elongation=33;synonymous_variant=26;splice_region_variant=2;3_prime_UTR_variant=6	upstream_gene_variant=47;non_coding_exon_variant=8;nc_transcript_variant=58;intron_variant=50;feature_elongation=3;feature_truncation=4;downstream_gene_variant=81	1	1	0	0	0	57.17	58.33	34.67	29.67	0.98	0.94	0.98	0.89	NA	CIS&TRANS
protein_coding	Cox11	ENSMUST00000020851	ENSMUST00000099960	protein_coding	protein_coding	TRUE	TRUE	upstream_gene_variant=2;5_prime_UTR_variant=1;missense_variant=4;synonymous_variant=3;intron_variant=48;feature_elongation=2;feature_truncation=4;3_prime_UTR_variant=3;downstream_gene_variant=1	upstream_gene_variant=31;5_prime_UTR_variant=2;intron_variant=24;feature_truncation=1;synonymous_variant=1;3_prime_UTR_variant=2;downstream_gene_variant=2	1	0	0	1	0	72.17	54.33	70.75	23.5	0.98	0.87	0.98	0.94	NA	CIS&TRANS
protein_coding	1700001C19Rik	ENSMUST00000061885	ENSMUST00000160678	protein_coding	processed_transcript	TRUE	NA	downstream_gene_variant=2;3_prime_UTR_variant=6;intron_variant=253;feature_truncation=14;feature_elongation=14;missense_variant=1;synonymous_variant=1;5_prime_UTR_variant=1;upstream_gene_variant=41	downstream_gene_variant=8;intron_variant=254;nc_transcript_variant=256;feature_truncation=14;feature_elongation=14;non_coding_exon_variant=2;upstream_gene_variant=41	0	0	1	1	1	108.17	20.67	40.5	19.58	0.86	0.33	0.91	0.38	cis	CIS&TRANS
protein_coding	Rnf138	ENSMUST00000072847	ENSMUST00000052396	protein_coding	protein_coding	TRUE	TRUE	upstream_gene_variant=1;5_prime_UTR_variant=4;intron_variant=184;feature_elongation=22;feature_truncation=28;3_prime_UTR_variant=5	upstream_gene_variant=1;5_prime_UTR_variant=4;intron_variant=184;feature_elongation=22;feature_truncation=28;3_prime_UTR_variant=5	0	0	0	0	1	19.67	21.33	5.83	8.08	0.58	0.34	0.48	0.28	NA	CIS&TRANS
protein_coding	Myd88	ENSMUST00000035092	ENSMUST00000150837	protein_coding	retained_intron	TRUE	NA	3_prime_UTR_variant=4;feature_elongation=1;intron_variant=13;synonymous_variant=2	non_coding_exon_variant=15;nc_transcript_variant=19;feature_elongation=1;intron_variant=4	0	0	1	1	1	73.5	61	22.08	32.33	0.98	0.97	0.89	0.98	cons	CONS
protein_coding	Acot11	ENSMUST00000102762	ENSMUST00000065253	protein_coding	protein_coding	TRUE	TRUE	3_prime_UTR_variant=42;feature_truncation=45;feature_elongation=45;synonymous_variant=11;intron_variant=721;splice_region_variant=8;missense_variant=1;upstream_gene_variant=65	downstream_gene_variant=33;3_prime_UTR_variant=9;feature_elongation=50;synonymous_variant=11;intron_variant=786;feature_truncation=45;splice_region_variant=8;missense_variant=1;upstream_gene_variant=1	1	0	0	1	0	10.83	32.83	21.75	13.25	0.84	0.52	0.93	0.77	cons	CIS&TRANS
protein_coding	Cbx4	ENSMUST00000026665	ENSMUST00000145058	protein_coding	processed_transcript	TRUE	NA	downstream_gene_variant=1;3_prime_UTR_variant=37;feature_elongation=10;synonymous_variant=6;missense_variant=2;intron_variant=20;feature_truncation=2;5_prime_UTR_variant=3	downstream_gene_variant=42;non_coding_exon_variant=7;nc_transcript_variant=27;intron_variant=20;feature_truncation=2;feature_elongation=5	0	0	0	1	1	26.67	30.33	20.92	28.92	0.58	0.48	0.67	0.61	cons	CONS
protein_coding	Zfp141	ENSMUST00000174407	ENSMUST00000173439	protein_coding	retained_intron	TRUE	NA	downstream_gene_variant=1;3_prime_UTR_variant=8;feature_elongation=21;missense_variant=5;intron_variant=293;feature_truncation=22;splice_region_variant=1;synonymous_variant=4;splice_donor_variant=1;5_prime_UTR_variant=6	downstream_gene_variant=48;non_coding_exon_variant=17;nc_transcript_variant=155;feature_truncation=7;feature_elongation=7;intron_variant=138;upstream_gene_variant=44	1	1	0	0	0	17	53.83	5.17	26.33	1	0.85	1	0.89	cis	Not in Dataset
protein_coding	Gm15401	ENSMUST00000081929	ENSMUST00000101278	protein_coding	protein_coding	TRUE	FALSE	upstream_gene_variant=52;5_prime_UTR_variant=7;intron_variant=71;feature_elongation=5;feature_truncation=6;splice_region_variant=1;frameshift_variant=1;missense_variant=1;3_prime_UTR_variant=1;downstream_gene_variant=30	upstream_gene_variant=62;5_prime_UTR_variant=1;frameshift_variant=1;feature_truncation=1;missense_variant=1;intron_variant=1;3_prime_UTR_variant=2;downstream_gene_variant=32	1	0	0	1	0	11.17	10.83	7.33	7.25	0.36	0.17	0.4	0.03	cis	CONS
protein_coding	Naa38	ENSMUST00000056398	ENSMUST00000136982	protein_coding	retained_intron	TRUE	NA	upstream_gene_variant=2;5_prime_UTR_variant=1;intron_variant=55;feature_elongation=10;feature_truncation=5;splice_region_variant=1;synonymous_variant=1;3_prime_UTR_variant=1;downstream_gene_variant=44	upstream_gene_variant=2;non_coding_exon_variant=55;nc_transcript_variant=101;feature_elongation=14;feature_truncation=11;intron_variant=46;downstream_gene_variant=1	0	0	1	1	1	71.33	63.17	28.33	54.25	0.99	0.99	0.98	1	cons	Not in Dataset
protein_coding	Snrnp40	ENSMUST00000105994	ENSMUST00000181560	protein_coding	processed_transcript	TRUE	NA	synonymous_variant=6;intron_variant=459;feature_truncation=29;feature_elongation=46;3_prime_UTR_variant=4;downstream_gene_variant=2	upstream_gene_variant=81;non_coding_exon_variant=14;nc_transcript_variant=55;feature_elongation=5;intron_variant=41;feature_truncation=4;downstream_gene_variant=20	1	1	0	0	0	52.33	63.17	25.58	32.08	1	0.99	1	0.99	NA	CONS
protein_coding	Prepl	ENSMUST00000171795	ENSMUST00000072406	protein_coding	protein_coding	TRUE	TRUE	downstream_gene_variant=1;3_prime_UTR_variant=6;feature_elongation=26;feature_truncation=21;synonymous_variant=6;intron_variant=249;splice_region_variant=2;frameshift_variant=1;5_prime_UTR_variant=3;upstream_gene_variant=1	downstream_gene_variant=1;3_prime_UTR_variant=6;feature_elongation=26;feature_truncation=21;synonymous_variant=6;intron_variant=253;splice_region_variant=1;upstream_gene_variant=1	0	0	0	0	1	28.5	30.83	22	16.25	0.68	0.48	1	0.24	CIS&TRANS	Not in Dataset
protein_coding	Tmem188	ENSMUST00000095214	ENSMUST00000121097	protein_coding	protein_coding	TRUE	TRUE	upstream_gene_variant=1;synonymous_variant=1;intron_variant=145;feature_truncation=14;feature_elongation=10;splice_region_variant=2;3_prime_UTR_variant=9	upstream_gene_variant=1;synonymous_variant=1;intron_variant=125;feature_truncation=12;feature_elongation=7;splice_region_variant=1;3_prime_UTR_variant=10;downstream_gene_variant=19	0	1	1	0	0	46.33	57.17	13.08	12.25	0.74	0.89	0.7	0.76	cons	Not in Dataset
protein_coding	Pi4k2b	ENSMUST00000031081	ENSMUST00000145825	protein_coding	retained_intron	TRUE	NA	upstream_gene_variant=2;intron_variant=309;feature_truncation=30;feature_elongation=32;splice_region_variant=1;synonymous_variant=5;3_prime_UTR_variant=19	upstream_gene_variant=55;intron_variant=39;nc_transcript_variant=47;feature_truncation=2;feature_elongation=2;non_coding_exon_variant=8;downstream_gene_variant=48	1	1	0	0	0	62.67	62.33	32.42	30	0.99	0.97	0.98	0.99	cons	CIS
protein_coding	BC068281	ENSMUST00000053034	ENSMUST00000085793	protein_coding	protein_coding	TRUE	TRUE	intron_variant=65;feature_truncation=7;feature_elongation=8;missense_variant=7;synonymous_variant=5;3_prime_UTR_variant=12;downstream_gene_variant=73	upstream_gene_variant=53;missense_variant=11;synonymous_variant=7;intron_variant=77;feature_elongation=5;feature_truncation=8;splice_region_variant=2;downstream_gene_variant=2	1	1	0	0	0	9.83	18	6.75	5.5	0.44	0.28	0.22	0.33	cons	CONS
protein_coding	Enpep	ENSMUST00000029658	ENSMUST00000164443	protein_coding	retained_intron	TRUE	NA	downstream_gene_variant=3;3_prime_UTR_variant=12;feature_elongation=54;synonymous_variant=14;intron_variant=873;splice_region_variant=4;feature_truncation=63;missense_variant=1	downstream_gene_variant=72;non_coding_exon_variant=5;nc_transcript_variant=46;intron_variant=41;feature_truncation=4;splice_region_variant=1;upstream_gene_variant=73	1	1	0	0	0	171	62.83	88.75	33.5	0.94	0.96	0.98	0.96	cons	CIS&TRANS
protein_coding	Ascc1	ENSMUST00000050516	ENSMUST00000164083	protein_coding	protein_coding	TRUE	FALSE	intron_variant=1145;feature_elongation=90;feature_truncation=88;synonymous_variant=3;splice_region_variant=1;3_prime_UTR_variant=1	upstream_gene_variant=6;5_prime_UTR_variant=1;feature_elongation=90;intron_variant=1138;feature_truncation=88;synonymous_variant=3;splice_region_variant=1;3_prime_UTR_variant=1	1	0	0	0	0	85.83	55.67	46.17	22.25	0.79	0.85	0.81	0.74	cons	CIS
protein_coding	Foxo3	ENSMUST00000105502	ENSMUST00000105501	protein_coding	protein_coding	TRUE	TRUE	downstream_gene_variant=2;3_prime_UTR_variant=37;feature_elongation=74;feature_truncation=84;intron_variant=938;synonymous_variant=1	downstream_gene_variant=62;3_prime_UTR_variant=1;missense_variant=3;intron_variant=261;feature_truncation=21;feature_elongation=26	0	1	1	0	0	53.83	63.67	35.42	32.92	0.89	0.97	0.84	0.97	cis	CONS
protein_coding	Yaf2	ENSMUST00000080299	ENSMUST00000133736	protein_coding	processed_transcript	TRUE	NA	3_prime_UTR_variant=5;feature_truncation=44;synonymous_variant=5;missense_variant=1;intron_variant=587;feature_elongation=33;splice_region_variant=1	non_coding_exon_variant=11;nc_transcript_variant=598;feature_truncation=44;intron_variant=587;feature_elongation=33;splice_region_variant=1	0	0	1	1	1	64.67	48.17	33.17	10.25	0.75	0.73	0.8	0.56	cons	CIS
protein_coding	Tacc1	ENSMUST00000084512	ENSMUST00000084030	protein_coding	protein_coding	TRUE	TRUE	downstream_gene_variant=1;3_prime_UTR_variant=68;feature_elongation=41;feature_truncation=32;intron_variant=339;splice_region_variant=1;missense_variant=1;synonymous_variant=1	downstream_gene_variant=1;3_prime_UTR_variant=68;feature_elongation=41;feature_truncation=32;intron_variant=328;splice_region_variant=1;missense_variant=4;synonymous_variant=9	0	0	0	0	1	60.67	54.33	21.92	19.33	0.96	0.82	0.87	0.89	trans	CONS
protein_coding	Kdm6b	ENSMUST00000094077	ENSMUST00000156562	protein_coding	processed_transcript	TRUE	NA	downstream_gene_variant=1;3_prime_UTR_variant=11;feature_truncation=8;synonymous_variant=5;intron_variant=40;splice_region_variant=3;feature_elongation=8;missense_variant=4;inframe_deletion=2;5_prime_UTR_variant=1	downstream_gene_variant=22;non_coding_exon_variant=8;nc_transcript_variant=10;feature_elongation=3;intron_variant=2;upstream_gene_variant=15	1	1	0	0	0	35.17	55.67	28.08	30.25	0.93	0.84	0.88	0.92	NA	CONS
lincRNA	2810410L24Rik	ENSMUST00000155681	ENSMUST00000145437	processed_transcript	processed_transcript	TRUE	NA	non_coding_exon_variant=21;nc_transcript_variant=25;feature_truncation=5;intron_variant=4;upstream_gene_variant=8	downstream_gene_variant=21;intron_variant=8;nc_transcript_variant=12;non_coding_exon_variant=4	1	0	0	1	0	28.83	11.33	12.42	13.83	0.08	0.17	0.19	0.24	cons	Not in Dataset
protein_coding	Cir1	ENSMUST00000058615	ENSMUST00000136519	protein_coding	processed_transcript	TRUE	NA	downstream_gene_variant=2;3_prime_UTR_variant=3;feature_elongation=26;synonymous_variant=3;inframe_deletion=1;missense_variant=1;intron_variant=277;feature_truncation=28;5_prime_UTR_variant=1;upstream_gene_variant=33	downstream_gene_variant=77;non_coding_exon_variant=3;nc_transcript_variant=60;intron_variant=57;feature_truncation=5;feature_elongation=1;upstream_gene_variant=34	0	1	1	0	0	60.17	63.33	26.25	41.5	0.98	0.95	0.9	0.98	cons	CONS
protein_coding	Spg20	ENSMUST00000044116	ENSMUST00000107971	protein_coding	protein_coding	TRUE	TRUE	intron_variant=221;feature_elongation=28;feature_truncation=15;synonymous_variant=5;missense_variant=2;splice_region_variant=1;3_prime_UTR_variant=24;downstream_gene_variant=2	intron_variant=221;feature_elongation=28;feature_truncation=15;synonymous_variant=5;missense_variant=2;splice_region_variant=1;3_prime_UTR_variant=24;downstream_gene_variant=2	0	0	1	1	1	43	36.83	25.75	6.92	0.67	0.55	0.74	0.5	cons	CIS&TRANS
protein_coding	Tox4	ENSMUST00000022766	ENSMUST00000152493	protein_coding	retained_intron	TRUE	NA	upstream_gene_variant=49;intron_variant=81;5_prime_UTR_variant=1;feature_truncation=12;feature_elongation=12;splice_region_variant=1;missense_variant=2;synonymous_variant=4;3_prime_UTR_variant=34;downstream_gene_variant=4	upstream_gene_variant=47;intron_variant=67;nc_transcript_variant=77;feature_truncation=7;feature_elongation=5;non_coding_exon_variant=10;splice_region_variant=1;downstream_gene_variant=47	1	1	0	0	1	59.83	61.67	26.83	27.75	0.97	0.92	0.95	0.97	cons	Not in Dataset
protein_coding	Prrc2b	ENSMUST00000036691	ENSMUST00000137551	protein_coding	protein_coding	TRUE	TRUE	intron_variant=359;feature_elongation=34;feature_truncation=32;splice_region_variant=1;missense_variant=7;synonymous_variant=6;3_prime_UTR_variant=13	upstream_gene_variant=28;intron_variant=49;feature_elongation=2;synonymous_variant=6;missense_variant=3;feature_truncation=2;3_prime_UTR_variant=13	1	0	0	1	1	52.17	60.33	20.83	15.75	0.75	0.9	0.67	0.87	cons	Not in Dataset
protein_coding	Gadd45g	ENSMUST00000021903	ENSMUST00000132480	protein_coding	retained_intron	TRUE	NA	intron_variant=2;3_prime_UTR_variant=2	intron_variant=2;nc_transcript_variant=3;non_coding_exon_variant=1;downstream_gene_variant=1	0	0	1	1	1	45	59.67	58.92	70	0.96	0.89	1	0.96	NA	CONS
lincRNA	AC163666.1	ENSMUST00000180723	ENSMUST00000180982	lincRNA	lincRNA	TRUE	NA	downstream_gene_variant=1;non_coding_exon_variant=11;nc_transcript_variant=12;feature_truncation=1;intron_variant=1;feature_elongation=1;upstream_gene_variant=2	downstream_gene_variant=6;non_coding_exon_variant=8;nc_transcript_variant=9;feature_truncation=1;feature_elongation=1;intron_variant=1	1	0	0	1	1	3.33	46	10.67	7.83	0.64	0.68	0.91	0.58	NA	Not in Dataset
lincRNA	9030622O22Rik	ENSMUST00000129082	ENSMUST00000132070	lincRNA	lincRNA	TRUE	NA	downstream_gene_variant=1;non_coding_exon_variant=9;nc_transcript_variant=344;intron_variant=335;feature_elongation=35;feature_truncation=27;splice_region_variant=1;upstream_gene_variant=38	downstream_gene_variant=69;non_coding_exon_variant=5;nc_transcript_variant=500;intron_variant=495;feature_truncation=45;feature_elongation=49;upstream_gene_variant=10	1	1	0	0	0	40.67	62	28.83	21.83	0.82	0.91	0.84	0.98	cons	Not in Dataset
protein_coding	Secisbp2	ENSMUST00000040117	ENSMUST00000153877	protein_coding	retained_intron	TRUE	NA	intron_variant=390;feature_elongation=36;missense_variant=8;synonymous_variant=7;feature_truncation=30;inframe_deletion=1;splice_region_variant=1;3_prime_UTR_variant=5	upstream_gene_variant=37;non_coding_exon_variant=6;nc_transcript_variant=12;feature_elongation=4;intron_variant=6;downstream_gene_variant=4	1	0	0	1	0	44.83	45.67	23.33	21.83	0.85	0.67	0.83	0.75	NA	CONS
protein_coding	Nphp1	ENSMUST00000028857	ENSMUST00000110357	protein_coding	protein_coding	TRUE	TRUE	downstream_gene_variant=2;3_prime_UTR_variant=2;feature_truncation=29;synonymous_variant=10;intron_variant=515;feature_elongation=37;missense_variant=1;splice_region_variant=4;inframe_deletion=2;frameshift_variant=1	downstream_gene_variant=2;3_prime_UTR_variant=2;feature_truncation=29;synonymous_variant=10;intron_variant=515;feature_elongation=37;missense_variant=1;splice_region_variant=4;inframe_deletion=2;frameshift_variant=1	0	0	1	1	1	6	15	1.92	1.08	0.14	0.22	0.29	0.35	NA	CONS
protein_coding	Slc35a3	ENSMUST00000029569	ENSMUST00000131082	protein_coding	retained_intron	TRUE	NA	3_prime_UTR_variant=18;feature_truncation=47;feature_elongation=32;intron_variant=448;splice_region_variant=1;5_prime_UTR_variant=2;upstream_gene_variant=3	downstream_gene_variant=91;non_coding_exon_variant=53;nc_transcript_variant=159;feature_elongation=9;feature_truncation=19;intron_variant=106;upstream_gene_variant=5	0	1	1	0	0	75.67	67.5	42.92	41	1	0.99	0.99	0.99	NA	CONS
lincRNA	Tug1	ENSMUST00000144852	ENSMUST00000132077	processed_transcript	processed_transcript	TRUE	NA	non_coding_exon_variant=10;nc_transcript_variant=35;feature_elongation=7;intron_variant=25;feature_truncation=1	downstream_gene_variant=8;non_coding_exon_variant=10;nc_transcript_variant=17;feature_elongation=4;feature_truncation=1;intron_variant=7;upstream_gene_variant=10	1	1	0	0	0	46	43.67	13.67	14	0.8	0.64	0.54	0.57	cons	CONS
protein_coding	Ablim3	ENSMUST00000049378	ENSMUST00000166783	protein_coding	protein_coding	TRUE	FALSE	3_prime_UTR_variant=23;feature_elongation=79;feature_truncation=71;intron_variant=1283;synonymous_variant=2;splice_region_variant=2;5_prime_UTR_variant=2	3_prime_UTR_variant=23;feature_elongation=79;feature_truncation=71;intron_variant=1285;synonymous_variant=2;splice_region_variant=2	0	0	1	0	1	44.5	31.5	11.08	12.83	0.3	0.46	0.38	0.77	cons	CONS
protein_coding	Fgd6	ENSMUST00000020208	ENSMUST00000141143	protein_coding	processed_transcript	TRUE	NA	5_prime_UTR_variant=1;feature_truncation=85;intron_variant=1104;feature_elongation=109;missense_variant=7;synonymous_variant=9;frameshift_variant=1;inframe_insertion=1;splice_region_variant=1;3_prime_UTR_variant=38	upstream_gene_variant=24;intron_variant=152;nc_transcript_variant=153;non_coding_exon_variant=1;feature_truncation=22;feature_elongation=18;downstream_gene_variant=71	1	1	0	0	0	49.5	62.5	22	26.92	0.95	0.91	0.94	0.97	cons	CONS
protein_coding	Dtx3l	ENSMUST00000081933	ENSMUST00000114885	protein_coding	protein_coding	TRUE	TRUE	3_prime_UTR_variant=6;feature_truncation=3;intron_variant=18;synonymous_variant=3;missense_variant=2	downstream_gene_variant=10;missense_variant=3;synonymous_variant=3;intron_variant=10	0	1	0	0	0	85.67	66.67	38.83	39.08	0.99	0.97	0.99	1	NA	CIS
protein_coding	Rbms2	ENSMUST00000092033	ENSMUST00000099139	protein_coding	protein_coding	TRUE	TRUE	3_prime_UTR_variant=22;feature_truncation=45;feature_elongation=51;intron_variant=394;splice_region_variant=1;synonymous_variant=4;frameshift_variant=1;upstream_gene_variant=35	3_prime_UTR_variant=22;feature_truncation=49;feature_elongation=56;intron_variant=427;splice_region_variant=1;synonymous_variant=4;5_prime_UTR_variant=2;upstream_gene_variant=1	1	0	0	0	0	43	66.83	22.33	25.58	0.97	0.97	0.96	0.9	cons	CIS
protein_coding	Aff4	ENSMUST00000060945	ENSMUST00000139054	protein_coding	retained_intron	TRUE	NA	upstream_gene_variant=1;intron_variant=319;feature_elongation=41;feature_truncation=30;synonymous_variant=6;missense_variant=1;3_prime_UTR_variant=29	upstream_gene_variant=13;intron_variant=24;nc_transcript_variant=44;feature_truncation=6;feature_elongation=1;non_coding_exon_variant=20;downstream_gene_variant=23	1	1	0	0	0	43.67	68.33	25.33	26.67	0.98	0.99	0.99	0.99	cons	CONS
protein_coding	Phactr4	ENSMUST00000102568	ENSMUST00000084170	protein_coding	protein_coding	TRUE	TRUE	downstream_gene_variant=2;3_prime_UTR_variant=23;feature_elongation=53;intron_variant=666;feature_truncation=53;missense_variant=2;synonymous_variant=1;5_prime_UTR_variant=2;upstream_gene_variant=1	downstream_gene_variant=2;3_prime_UTR_variant=23;feature_elongation=53;intron_variant=666;feature_truncation=53;missense_variant=2;synonymous_variant=1;5_prime_UTR_variant=2;upstream_gene_variant=1	0	0	1	1	1	36.83	43.5	11.17	11.83	0.54	0.63	0.67	0.43	cons	Not in Dataset
protein_coding	Gcap14	ENSMUST00000067700	ENSMUST00000090024	protein_coding	protein_coding	TRUE	TRUE	downstream_gene_variant=1;3_prime_UTR_variant=18;feature_elongation=38;feature_truncation=37;intron_variant=416;synonymous_variant=1;splice_region_variant=1;upstream_gene_variant=80	downstream_gene_variant=1;3_prime_UTR_variant=18;feature_elongation=68;feature_truncation=67;intron_variant=915;synonymous_variant=13;splice_region_variant=1;missense_variant=9;upstream_gene_variant=1	1	0	0	0	1	35.5	47.83	18	17.5	0.89	0.69	0.79	0.73	NA	CONS
protein_coding	Qk	ENSMUST00000097414	ENSMUST00000042296	protein_coding	protein_coding	TRUE	TRUE	3_prime_UTR_variant=1;intron_variant=504;feature_truncation=68;feature_elongation=53;upstream_gene_variant=1	downstream_gene_variant=2;3_prime_UTR_variant=19;feature_truncation=68;feature_elongation=53;intron_variant=484;upstream_gene_variant=1	0	1	0	0	0	54.17	50	17.17	19.5	0.74	0.72	0.49	0.62	cons	CONS
protein_coding	Trp53inp1	ENSMUST00000029865	ENSMUST00000132010	protein_coding	processed_transcript	TRUE	NA	intron_variant=76;feature_truncation=12;feature_elongation=14;synonymous_variant=1;3_prime_UTR_variant=21;downstream_gene_variant=1	intron_variant=76;nc_transcript_variant=98;feature_truncation=12;feature_elongation=14;non_coding_exon_variant=22;downstream_gene_variant=1	0	0	1	0	1	29.33	18.33	1.08	0.5	0.3	0.26	0.56	0.33	NA	CONS
protein_coding	Psmd9	ENSMUST00000100729	ENSMUST00000133386	protein_coding	processed_transcript	TRUE	NA	synonymous_variant=1;intron_variant=193;feature_elongation=16;feature_truncation=23;missense_variant=5;3_prime_UTR_variant=20	non_coding_exon_variant=32;nc_transcript_variant=159;intron_variant=127;feature_elongation=12;feature_truncation=16;downstream_gene_variant=60	0	1	0	0	0	133.67	67	68	34.33	0.97	0.95	0.96	0.98	cons	CIS
protein_coding	Thap3	ENSMUST00000036680	ENSMUST00000146471	protein_coding	retained_intron	TRUE	NA	3_prime_UTR_variant=7;feature_elongation=8;synonymous_variant=4;intron_variant=60;feature_truncation=5;5_prime_UTR_variant=1	downstream_gene_variant=30;non_coding_exon_variant=6;nc_transcript_variant=42;intron_variant=36;feature_elongation=4;feature_truncation=4	0	1	1	0	0	55.83	59.33	37.5	37.58	0.93	0.84	0.84	0.89	NA	Not in Dataset
protein_coding	Plekha3	ENSMUST00000111920	ENSMUST00000125119	protein_coding	processed_transcript	TRUE	NA	upstream_gene_variant=45;intron_variant=276;feature_elongation=15;feature_truncation=25;splice_region_variant=2;synonymous_variant=1;3_prime_UTR_variant=5;downstream_gene_variant=3	upstream_gene_variant=91;non_coding_exon_variant=6;nc_transcript_variant=24;intron_variant=18;feature_truncation=4;downstream_gene_variant=22	1	1	0	0	0	63.67	60.83	24.83	35.58	0.96	0.86	0.98	0.8	cis	CONS
protein_coding	Abhd14a	ENSMUST00000171678	ENSMUST00000171925	protein_coding	protein_coding	TRUE	TRUE	3_prime_UTR_variant=1;missense_variant=1;synonymous_variant=1;intron_variant=38;splice_region_variant=1;feature_elongation=3;feature_truncation=6;5_prime_UTR_variant=8;upstream_gene_variant=2	3_prime_UTR_variant=1;missense_variant=1;synonymous_variant=1;intron_variant=44;splice_region_variant=1;feature_elongation=3;feature_truncation=6;5_prime_UTR_variant=2;upstream_gene_variant=2	0	0	0	0	1	88.17	63.67	33.08	25	0.87	0.9	0.99	0.78	cons	CIS&TRANS
protein_coding	Rdh10	ENSMUST00000027053	ENSMUST00000152626	protein_coding	retained_intron	TRUE	NA	upstream_gene_variant=3;intron_variant=220;feature_elongation=22;feature_truncation=20;synonymous_variant=3;3_prime_UTR_variant=12	upstream_gene_variant=43;non_coding_exon_variant=14;nc_transcript_variant=15;feature_truncation=1;intron_variant=1;downstream_gene_variant=5	1	0	0	1	0	60.33	66.5	37.25	35.92	0.77	0.94	0.97	0.9	NA	CONS
protein_coding	Ppap2a	ENSMUST00000016144	ENSMUST00000070951	protein_coding	protein_coding	TRUE	TRUE	upstream_gene_variant=1;5_prime_UTR_variant=4;synonymous_variant=3;intron_variant=976;feature_elongation=69;feature_truncation=88;missense_variant=1;3_prime_UTR_variant=2;downstream_gene_variant=1	upstream_gene_variant=1;5_prime_UTR_variant=4;synonymous_variant=3;intron_variant=976;feature_elongation=69;feature_truncation=88;missense_variant=1;3_prime_UTR_variant=1;downstream_gene_variant=2	0	0	1	1	1	43.33	40.33	17.58	19.75	0.66	0.57	0.68	0.7	cons	CONS
protein_coding	Otud6b	ENSMUST00000117268	ENSMUST00000151012	protein_coding	nonsense_mediated_decay	TRUE	TRUE	3_prime_UTR_variant=14;synonymous_variant=3;intron_variant=177;feature_elongation=22;feature_truncation=10;missense_variant=1;upstream_gene_variant=3	downstream_gene_variant=1;3_prime_UTR_variant=17;NMD_transcript_variant=193;intron_variant=176;feature_elongation=22;feature_truncation=10;upstream_gene_variant=4	0	0	1	1	1	69.33	51.67	39.33	24.42	0.8	0.73	0.84	0.79	cons	CIS
processed_transcript	5730435O14Rik	ENSMUST00000170047	ENSMUST00000165647	antisense	retained_intron	TRUE	NA	upstream_gene_variant=1;non_coding_exon_variant=17;nc_transcript_variant=126;splice_region_variant=3;intron_variant=109;feature_elongation=10;feature_truncation=7;downstream_gene_variant=6	upstream_gene_variant=74;non_coding_exon_variant=14;nc_transcript_variant=18;splice_region_variant=1;intron_variant=4;feature_elongation=1;downstream_gene_variant=7	1	0	0	1	1	4	8.5	12.67	6	0.53	0.12	0.62	0	cis	Not in Dataset
protein_coding	Mob1a	ENSMUST00000055261	ENSMUST00000038658	protein_coding	protein_coding	TRUE	TRUE	upstream_gene_variant=1;5_prime_UTR_variant=3;intron_variant=121;feature_elongation=14;feature_truncation=15;3_prime_UTR_variant=23;downstream_gene_variant=2	upstream_gene_variant=2;5_prime_UTR_variant=2;intron_variant=121;feature_elongation=14;feature_truncation=15;3_prime_UTR_variant=23;downstream_gene_variant=2	0	0	1	1	1	35.17	63.83	14.42	26.25	0.54	0.9	0.73	0.92	NA	Not in Dataset
protein_coding	Gzf1	ENSMUST00000028928	ENSMUST00000131292	protein_coding	protein_coding	TRUE	TRUE	upstream_gene_variant=3;5_prime_UTR_variant=2;feature_elongation=6;intron_variant=87;feature_truncation=5;synonymous_variant=13;missense_variant=4;3_prime_UTR_variant=16	upstream_gene_variant=4;5_prime_UTR_variant=2;splice_region_variant=2;intron_variant=28;feature_truncation=1;feature_elongation=4;synonymous_variant=3;missense_variant=1;downstream_gene_variant=44	0	1	1	0	1	80	68.83	48.5	31	0.94	0.97	0.93	0.99	cons	CIS&TRANS
protein_coding	Zfp592	ENSMUST00000107353	ENSMUST00000125137	protein_coding	retained_intron	TRUE	NA	intron_variant=411;feature_truncation=42;feature_elongation=35;synonymous_variant=10;missense_variant=2;3_prime_UTR_variant=18;downstream_gene_variant=1	upstream_gene_variant=42;non_coding_exon_variant=2;nc_transcript_variant=34;intron_variant=32;feature_truncation=6;feature_elongation=1;downstream_gene_variant=23	1	0	0	1	0	39.67	46.17	17	17.33	0.7	0.65	0.88	0.94	cons	CONS
protein_coding	Myo9b	ENSMUST00000170242	ENSMUST00000071935	protein_coding	protein_coding	TRUE	TRUE	5_prime_UTR_variant=2;feature_truncation=32;intron_variant=421;feature_elongation=31;synonymous_variant=6;missense_variant=6;inframe_deletion=1;3_prime_UTR_variant=3	5_prime_UTR_variant=2;feature_truncation=33;intron_variant=422;feature_elongation=31;synonymous_variant=6;missense_variant=4;splice_acceptor_variant=1;coding_sequence_variant=1;3_prime_UTR_variant=5	0	0	0	0	1	23.5	26.33	10	12.33	0.65	0.37	0.74	0.43	cis	CIS&TRANS
protein_coding	Phpt1	ENSMUST00000039156	ENSMUST00000147096	protein_coding	processed_transcript	TRUE	NA	intron_variant=4;feature_truncation=1;5_prime_UTR_variant=3	intron_variant=4;nc_transcript_variant=5;feature_truncation=1;non_coding_exon_variant=1;upstream_gene_variant=2	0	0	1	1	1	148	69.17	41.83	60.58	0.8	0.97	0.86	0.79	NA	CONS
protein_coding	Dnajc21	ENSMUST00000136591	ENSMUST00000147224	protein_coding	retained_intron	TRUE	NA	3_prime_UTR_variant=2;feature_truncation=23;synonymous_variant=5;intron_variant=335;missense_variant=1;feature_elongation=37;upstream_gene_variant=18	downstream_gene_variant=98;non_coding_exon_variant=38;nc_transcript_variant=130;feature_elongation=14;feature_truncation=6;intron_variant=92;upstream_gene_variant=59	1	1	0	0	0	64.5	70	34.33	34.25	1	0.98	1	0.99	cons	CONS
protein_coding	2200002D01Rik	ENSMUST00000032808	ENSMUST00000151339	protein_coding	retained_intron	TRUE	NA	3_prime_UTR_variant=9;feature_elongation=1;inframe_insertion=1;missense_variant=2	downstream_gene_variant=9;non_coding_exon_variant=3;nc_transcript_variant=3;feature_elongation=1	1	0	0	1	0	74.67	63.17	57.75	46.83	0.52	0.88	0.7	0.8	NA	CONS
protein_coding	Snrnp35	ENSMUST00000031349	ENSMUST00000111453	protein_coding	protein_coding	TRUE	FALSE	upstream_gene_variant=1;5_prime_UTR_variant=2;intron_variant=122;feature_truncation=10;feature_elongation=9;synonymous_variant=3;3_prime_UTR_variant=7	upstream_gene_variant=5;5_prime_UTR_variant=5;splice_region_variant=1;intron_variant=115;feature_truncation=10;feature_elongation=9;synonymous_variant=3;3_prime_UTR_variant=7	1	0	0	1	0	44.67	61.5	21.75	32.25	0.73	0.85	0.78	0.76	cons	CONS
protein_coding	Coq3	ENSMUST00000029909	ENSMUST00000142244	protein_coding	processed_transcript	TRUE	NA	intron_variant=194;feature_elongation=11;feature_truncation=11;missense_variant=5;splice_region_variant=2;synonymous_variant=1;3_prime_UTR_variant=11	upstream_gene_variant=24;non_coding_exon_variant=7;nc_transcript_variant=22;intron_variant=15;feature_elongation=1;splice_region_variant=1;downstream_gene_variant=33	1	1	0	0	0	71.67	71.33	42	47.75	0.98	0.97	0.98	0.98	cons	Not in Dataset
protein_coding	Cuedc2	ENSMUST00000167861	ENSMUST00000051234	protein_coding	protein_coding	TRUE	FALSE	downstream_gene_variant=2;3_prime_UTR_variant=7;feature_truncation=10;intron_variant=86;feature_elongation=8;missense_variant=1;5_prime_UTR_variant=1;upstream_gene_variant=1	downstream_gene_variant=2;3_prime_UTR_variant=7;feature_truncation=10;intron_variant=86;feature_elongation=8;missense_variant=1;5_prime_UTR_variant=1;upstream_gene_variant=1	0	0	0	0	1	33	37.67	22.67	32.58	0.5	0.51	0.29	0.64	cons	CONS
protein_coding	Farp2	ENSMUST00000041983	ENSMUST00000122402	protein_coding	protein_coding	TRUE	TRUE	intron_variant=951;feature_elongation=84;feature_truncation=72;synonymous_variant=5;missense_variant=3;splice_region_variant=1;3_prime_UTR_variant=2;downstream_gene_variant=1	intron_variant=616;feature_elongation=55;feature_truncation=50;synonymous_variant=6;missense_variant=2;downstream_gene_variant=30	0	1	1	0	1	41.83	67.33	8.42	15	0.95	0.91	0.95	0.76	cons	CIS
protein_coding	Abtb2	ENSMUST00000076212	ENSMUST00000131122	protein_coding	processed_transcript	TRUE	NA	upstream_gene_variant=2;5_prime_UTR_variant=3;feature_truncation=66;synonymous_variant=11;intron_variant=1257;feature_elongation=98;splice_region_variant=1;3_prime_UTR_variant=11	upstream_gene_variant=58;non_coding_exon_variant=32;nc_transcript_variant=37;intron_variant=5;splice_region_variant=1;feature_elongation=3;feature_truncation=1	1	0	0	0	1	36.67	68.83	15.67	30.5	0.95	0.93	0.96	0.97	cons	CIS
protein_coding	Fam149a	ENSMUST00000135912	ENSMUST00000155230	protein_coding	protein_coding	TRUE	TRUE	downstream_gene_variant=1;3_prime_UTR_variant=26;feature_elongation=14;feature_truncation=21;intron_variant=336;synonymous_variant=10;missense_variant=14;splice_region_variant=2;upstream_gene_variant=87	downstream_gene_variant=26;3_prime_UTR_variant=1;intron_variant=336;feature_elongation=12;feature_truncation=20;synonymous_variant=10;missense_variant=11;splice_region_variant=2;upstream_gene_variant=89	0	0	1	1	1	38.67	43.67	31.92	23.17	0.48	0.59	0.33	0.7	cis	CONS
protein_coding	Zcchc9	ENSMUST00000022121	ENSMUST00000178637	protein_coding	retained_intron	TRUE	NA	downstream_gene_variant=1;3_prime_UTR_variant=1;intron_variant=105;feature_elongation=4;feature_truncation=9;missense_variant=2;synonymous_variant=6;5_prime_UTR_variant=3;splice_region_variant=1;upstream_gene_variant=4	downstream_gene_variant=1;non_coding_exon_variant=45;nc_transcript_variant=117;intron_variant=72;feature_elongation=4;feature_truncation=9;splice_region_variant=1;upstream_gene_variant=4	0	0	0	1	1	43.17	72	12.67	32.17	0.93	0.97	0.87	0.98	cis	CIS
protein_coding	Acot4	ENSMUST00000021652	ENSMUST00000128162	protein_coding	retained_intron	TRUE	NA	5_prime_UTR_variant=1;missense_variant=7;synonymous_variant=5;intron_variant=39;feature_truncation=10;feature_elongation=7;3_prime_UTR_variant=10;downstream_gene_variant=2	upstream_gene_variant=5;non_coding_exon_variant=9;nc_transcript_variant=32;intron_variant=23;feature_truncation=4;feature_elongation=1;downstream_gene_variant=27	0	1	1	0	0	57.17	73.5	51.92	85.25	0.96	0.99	0.99	0.97	NA	CIS&TRANS
protein_coding	1810046K07Rik	ENSMUST00000039959	ENSMUST00000181366	protein_coding	protein_coding	TRUE	TRUE	downstream_gene_variant=1;3_prime_UTR_variant=4;feature_truncation=28;synonymous_variant=1;intron_variant=451;feature_elongation=30;splice_acceptor_variant=1	downstream_gene_variant=6;intron_variant=253;feature_elongation=17;feature_truncation=14;5_prime_UTR_variant=2;upstream_gene_variant=61	1	0	0	1	0	17.5	38	26.58	20.67	0.42	0.51	0.49	0.57	cons	CIS
antisense	Gm17029	ENSMUST00000146124	ENSMUST00000153443	antisense	antisense	TRUE	NA	intron_variant=111;nc_transcript_variant=124;feature_truncation=8;feature_elongation=9;non_coding_exon_variant=13	intron_variant=19;nc_transcript_variant=29;feature_truncation=3;non_coding_exon_variant=10;feature_elongation=2;downstream_gene_variant=30	0	1	1	0	1	0.67	12.67	5.5	5.5	0.5	0.17	0.01	0.43	CIS&TRANS	Not in Dataset
protein_coding	Hook1	ENSMUST00000030306	ENSMUST00000156910	protein_coding	processed_transcript	TRUE	NA	upstream_gene_variant=39;5_prime_UTR_variant=1;intron_variant=435;feature_elongation=38;feature_truncation=41;synonymous_variant=3;splice_region_variant=1;missense_variant=1;3_prime_UTR_variant=25	upstream_gene_variant=54;non_coding_exon_variant=26;nc_transcript_variant=26;feature_elongation=2;feature_truncation=3	1	0	0	1	0	69.17	32.83	27.92	14.92	0.24	0.44	0.38	0.51	NA	CONS
protein_coding	Iqcg	ENSMUST00000115100	ENSMUST00000133219	protein_coding	processed_transcript	TRUE	NA	downstream_gene_variant=21;3_prime_UTR_variant=22;feature_truncation=38;feature_elongation=46;intron_variant=481;splice_region_variant=1;synonymous_variant=4;missense_variant=3;upstream_gene_variant=1	downstream_gene_variant=35;intron_variant=79;nc_transcript_variant=82;feature_elongation=15;splice_region_variant=1;non_coding_exon_variant=3;feature_truncation=5;upstream_gene_variant=88	1	0	0	1	0	3.83	50	1.75	61.67	0.97	0.67	0.89	0.59	cons	CIS&TRANS
protein_coding	Adck1	ENSMUST00000101165	ENSMUST00000166940	protein_coding	protein_coding	TRUE	FALSE	intron_variant=1329;feature_truncation=70;feature_elongation=81;missense_variant=2;synonymous_variant=3;splice_region_variant=2;3_prime_UTR_variant=1;downstream_gene_variant=1	5_prime_UTR_variant=2;intron_variant=1327;feature_truncation=70;feature_elongation=81;missense_variant=2;synonymous_variant=3;splice_region_variant=2;3_prime_UTR_variant=1;downstream_gene_variant=1	1	0	0	1	0	43.17	46.33	39.83	21.67	0.41	0.62	0.27	0.32	cons	CONS
protein_coding	Hdac2	ENSMUST00000019911	ENSMUST00000105510	protein_coding	protein_coding	TRUE	TRUE	upstream_gene_variant=1;5_prime_UTR_variant=3;intron_variant=263;feature_elongation=22;feature_truncation=16;synonymous_variant=5;splice_region_variant=1;3_prime_UTR_variant=1;downstream_gene_variant=1	upstream_gene_variant=1;5_prime_UTR_variant=3;intron_variant=150;feature_elongation=17;feature_truncation=14;synonymous_variant=2;3_prime_UTR_variant=45;downstream_gene_variant=65	0	1	1	0	0	86.17	74.17	33.67	47.58	1	0.99	0.99	0.99	cons	CONS
protein_coding	Cpeb4	ENSMUST00000109412	ENSMUST00000155278	protein_coding	protein_coding	TRUE	TRUE	upstream_gene_variant=1;intron_variant=309;feature_truncation=28;feature_elongation=43;splice_region_variant=1;synonymous_variant=1;3_prime_UTR_variant=15	upstream_gene_variant=1;intron_variant=309;feature_truncation=28;feature_elongation=43;splice_region_variant=1;synonymous_variant=1;3_prime_UTR_variant=15	0	0	1	0	1	48.67	31.5	16	22.33	0.23	0.42	0.25	0.16	NA	CONS
protein_coding	Mettl20	ENSMUST00000047531	ENSMUST00000111548	protein_coding	protein_coding	TRUE	TRUE	upstream_gene_variant=9;intron_variant=39;feature_elongation=7;feature_truncation=5;missense_variant=1;3_prime_UTR_variant=1	upstream_gene_variant=9;intron_variant=11;feature_elongation=2;feature_truncation=1;missense_variant=1;inframe_insertion=1;3_prime_UTR_variant=3;downstream_gene_variant=23	0	1	1	0	1	74.5	10.5	23.92	2.17	0.48	0.14	0.16	0.67	CIS&TRANS	Not in Dataset
protein_coding	Rab35	ENSMUST00000031492	ENSMUST00000138885	protein_coding	nonsense_mediated_decay	TRUE	NA	intron_variant=91;feature_elongation=6;feature_truncation=3;synonymous_variant=1;3_prime_UTR_variant=5	intron_variant=91;NMD_transcript_variant=93;nc_transcript_variant=93;feature_elongation=6;feature_truncation=3;non_coding_exon_variant=2;downstream_gene_variant=4	0	0	1	1	1	62.67	66.17	36.67	26.25	1	0.88	0.96	0.93	NA	CONS
protein_coding	Wdr8	ENSMUST00000030895	ENSMUST00000142665	protein_coding	processed_transcript	TRUE	NA	upstream_gene_variant=3;intron_variant=158;feature_truncation=14;feature_elongation=10;synonymous_variant=5;3_prime_UTR_variant=2;downstream_gene_variant=36	upstream_gene_variant=3;intron_variant=140;nc_transcript_variant=165;feature_truncation=14;feature_elongation=10;non_coding_exon_variant=25;downstream_gene_variant=36	0	0	1	0	1	65.67	73	31.5	38.33	0.98	0.97	0.97	0.98	cons	CONS
protein_coding	Rab12	ENSMUST00000167962	ENSMUST00000155026	protein_coding	retained_intron	TRUE	NA	downstream_gene_variant=1;3_prime_UTR_variant=5;intron_variant=338;feature_truncation=27;feature_elongation=25;synonymous_variant=2;upstream_gene_variant=2	downstream_gene_variant=35;non_coding_exon_variant=10;nc_transcript_variant=57;feature_elongation=4;intron_variant=47;feature_truncation=3;upstream_gene_variant=52	1	1	0	0	0	106.83	74.17	17.83	14.17	0.98	0.98	0.89	0.82	cons	CONS
protein_coding	Ski	ENSMUST00000129314	ENSMUST00000030917	processed_transcript	protein_coding	TRUE	NA	non_coding_exon_variant=15;nc_transcript_variant=427;feature_truncation=41;feature_elongation=39;intron_variant=412;splice_region_variant=1;upstream_gene_variant=64	3_prime_UTR_variant=8;feature_truncation=73;feature_elongation=79;synonymous_variant=7;intron_variant=862;splice_region_variant=1;missense_variant=1	1	0	0	0	0	40.17	34.33	17.67	15.5	0.65	0.45	0.34	0.41	cons	CONS
protein_coding	Aggf1	ENSMUST00000022189	ENSMUST00000161671	protein_coding	processed_transcript	TRUE	NA	downstream_gene_variant=1;3_prime_UTR_variant=7;feature_truncation=29;synonymous_variant=8;intron_variant=273;feature_elongation=20;missense_variant=8;splice_region_variant=1;5_prime_UTR_variant=2	downstream_gene_variant=29;non_coding_exon_variant=20;nc_transcript_variant=270;feature_truncation=25;intron_variant=250;splice_region_variant=1;feature_elongation=18	0	1	1	0	0	69.83	75.83	37.92	38	1	0.99	1	0.98	cons	CONS
protein_coding	Tmem140	ENSMUST00000074949	ENSMUST00000123019	protein_coding	processed_transcript	TRUE	NA	intron_variant=136;feature_elongation=8;feature_truncation=11;missense_variant=2;synonymous_variant=2;3_prime_UTR_variant=34;downstream_gene_variant=3	intron_variant=71;nc_transcript_variant=113;feature_elongation=5;feature_truncation=8;non_coding_exon_variant=42;downstream_gene_variant=64	0	1	0	0	0	98.17	73.67	41.58	51.25	0.93	0.96	0.94	0.97	NA	Not in Dataset
protein_coding	Tpd52	ENSMUST00000120143	ENSMUST00000091354	protein_coding	protein_coding	TRUE	TRUE	3_prime_UTR_variant=37;feature_elongation=98;feature_truncation=80;intron_variant=1092;synonymous_variant=2	downstream_gene_variant=12;3_prime_UTR_variant=25;feature_truncation=39;feature_elongation=44;intron_variant=519;synonymous_variant=3;5_prime_UTR_variant=1;upstream_gene_variant=96	1	0	0	1	0	23	24.67	4.67	4.75	0.4	0.32	0.55	0.5	cons	CONS
protein_coding	Ssfa2	ENSMUST00000111785	ENSMUST00000133266	protein_coding	processed_transcript	TRUE	NA	intron_variant=246;feature_truncation=22;feature_elongation=14;synonymous_variant=15;missense_variant=8;inframe_insertion=1;splice_region_variant=3	upstream_gene_variant=38;non_coding_exon_variant=24;nc_transcript_variant=232;intron_variant=208;feature_truncation=18;feature_elongation=14;splice_region_variant=3	1	0	0	0	0	52.5	40.17	12.25	30.92	0.07	0.52	0.42	0.22	NA	CIS
protein_coding	Cisd2	ENSMUST00000029815	ENSMUST00000120988	protein_coding	protein_coding	TRUE	TRUE	downstream_gene_variant=1;3_prime_UTR_variant=9;feature_elongation=13;feature_truncation=16;intron_variant=161;5_prime_UTR_variant=6;upstream_gene_variant=1	downstream_gene_variant=22;3_prime_UTR_variant=10;feature_elongation=10;intron_variant=139;feature_truncation=14;upstream_gene_variant=7	0	1	1	0	0	87.5	77.67	48.58	44.58	0.94	0.99	0.89	1	cis	CONS
protein_coding	Akip1	ENSMUST00000033335	ENSMUST00000143581	protein_coding	protein_coding	TRUE	TRUE	intron_variant=54;feature_elongation=4;missense_variant=1;feature_truncation=1;3_prime_UTR_variant=2;downstream_gene_variant=1	5_prime_UTR_variant=1;intron_variant=30;feature_elongation=2;missense_variant=1;downstream_gene_variant=26	0	1	1	0	1	161.33	76.17	62.92	46.58	0.98	0.97	0.96	0.98	cons	Not in Dataset
protein_coding	D9Ertd402e	ENSMUST00000052740	ENSMUST00000136274	protein_coding	nonsense_mediated_decay	TRUE	TRUE	intron_variant=226;feature_truncation=19;feature_elongation=14;synonymous_variant=4;3_prime_UTR_variant=8;downstream_gene_variant=2	intron_variant=226;NMD_transcript_variant=238;feature_truncation=19;feature_elongation=14;synonymous_variant=1;3_prime_UTR_variant=11;downstream_gene_variant=2	0	0	1	1	1	50.67	66.17	22.08	17.25	0.82	0.84	0.73	0.65	cons	CONS
protein_coding	Ptprj	ENSMUST00000111493	ENSMUST00000168621	protein_coding	protein_coding	TRUE	TRUE	intron_variant=13;feature_truncation=2;feature_elongation=3;synonymous_variant=1	intron_variant=61;feature_truncation=9;feature_elongation=14;synonymous_variant=1;missense_variant=1	1	0	0	0	0	85.83	73.33	21.83	28.08	0.95	0.93	0.81	0.84	cons	Not in Dataset
protein_coding	Krit1	ENSMUST00000171023	ENSMUST00000080085	protein_coding	protein_coding	TRUE	TRUE	intron_variant=229;feature_truncation=26;feature_elongation=18;5_prime_UTR_variant=1;synonymous_variant=5;missense_variant=3;3_prime_UTR_variant=20	intron_variant=227;feature_truncation=26;feature_elongation=18;splice_region_variant=2;5_prime_UTR_variant=1;synonymous_variant=7;missense_variant=3;3_prime_UTR_variant=20	0	0	0	0	1	15.17	12.67	6.25	3.67	0.03	0.16	0.16	0.03	NA	CONS
protein_coding	Mob4	ENSMUST00000162364	ENSMUST00000162930	protein_coding	retained_intron	TRUE	NA	upstream_gene_variant=1;intron_variant=140;feature_elongation=15;feature_truncation=16;3_prime_UTR_variant=7;downstream_gene_variant=4	upstream_gene_variant=1;intron_variant=128;nc_transcript_variant=147;feature_elongation=15;feature_truncation=16;non_coding_exon_variant=19;downstream_gene_variant=4	0	0	1	1	1	66.33	78.5	20.25	50.08	0.99	0.99	0.98	0.99	cons	Not in Dataset
protein_coding	Cd276	ENSMUST00000039788	ENSMUST00000165365	protein_coding	protein_coding	TRUE	FALSE	3_prime_UTR_variant=36;feature_elongation=8;feature_truncation=9;intron_variant=160;missense_variant=1;synonymous_variant=3;5_prime_UTR_variant=2;upstream_gene_variant=48	3_prime_UTR_variant=36;feature_elongation=20;feature_truncation=14;intron_variant=291;missense_variant=1;synonymous_variant=3;5_prime_UTR_variant=2;upstream_gene_variant=1	1	0	0	1	0	5.17	47.67	0.92	10.92	0.83	0.6	0.67	0.55	NA	CIS&TRANS
protein_coding	Sh3pxd2a	ENSMUST00000081619	ENSMUST00000111800	protein_coding	protein_coding	TRUE	TRUE	downstream_gene_variant=2;3_prime_UTR_variant=43;feature_truncation=141;synonymous_variant=21;missense_variant=1;intron_variant=2400;feature_elongation=179;splice_region_variant=2;5_prime_UTR_variant=1;upstream_gene_variant=1	downstream_gene_variant=2;3_prime_UTR_variant=43;feature_truncation=141;synonymous_variant=20;missense_variant=1;intron_variant=2401;feature_elongation=179;splice_region_variant=2;5_prime_UTR_variant=1;upstream_gene_variant=1	0	0	0	0	1	24.5	72.67	13.83	23.5	0.92	0.91	0.67	0.73	NA	CONS
protein_coding	Cog7	ENSMUST00000057576	ENSMUST00000148634	protein_coding	retained_intron	TRUE	NA	3_prime_UTR_variant=4;feature_truncation=43;intron_variant=573;feature_elongation=37;synonymous_variant=8;splice_region_variant=4;missense_variant=1	downstream_gene_variant=81;non_coding_exon_variant=16;nc_transcript_variant=499;intron_variant=483;feature_truncation=34;feature_elongation=34;splice_region_variant=4	0	1	1	0	1	73.5	78.5	46.83	45.58	1	0.98	1	0.99	NA	CONS
protein_coding	Ulk2	ENSMUST00000004920	ENSMUST00000129025	protein_coding	processed_transcript	TRUE	NA	3_prime_UTR_variant=1;intron_variant=507;feature_truncation=48;feature_elongation=53;synonymous_variant=1;splice_region_variant=1;5_prime_UTR_variant=3	downstream_gene_variant=1;intron_variant=507;nc_transcript_variant=508;feature_truncation=48;feature_elongation=53;non_coding_exon_variant=1;splice_region_variant=1;upstream_gene_variant=3	0	0	1	1	1	94.5	53.67	51.58	17.75	0.89	0.67	0.97	0.97	NA	CIS&TRANS
protein_coding	Nsmce2	ENSMUST00000079703	ENSMUST00000168722	protein_coding	protein_coding	TRUE	TRUE	upstream_gene_variant=1;5_prime_UTR_variant=1;intron_variant=1986;feature_elongation=175;feature_truncation=142;synonymous_variant=1;3_prime_UTR_variant=4;downstream_gene_variant=1	upstream_gene_variant=1;5_prime_UTR_variant=1;intron_variant=1278;feature_elongation=121;feature_truncation=104;3_prime_UTR_variant=16;downstream_gene_variant=35	0	1	0	0	0	63	78.83	24.83	48.92	0.98	0.98	0.96	0.97	cons	CONS
protein_coding	Rnft1	ENSMUST00000020827	ENSMUST00000125675	protein_coding	processed_transcript	TRUE	NA	intron_variant=42;feature_elongation=8;synonymous_variant=2;feature_truncation=7;3_prime_UTR_variant=23	intron_variant=15;nc_transcript_variant=17;feature_elongation=3;non_coding_exon_variant=2;feature_truncation=2;downstream_gene_variant=23	0	1	1	0	1	56.5	48.33	33.25	23.75	0.77	0.6	0.87	0.85	cons	CONS
protein_coding	Zfp655	ENSMUST00000167316	ENSMUST00000085661	protein_coding	protein_coding	TRUE	TRUE	upstream_gene_variant=1;5_prime_UTR_variant=1;intron_variant=74;feature_elongation=7;feature_truncation=12;missense_variant=3;splice_region_variant=1;synonymous_variant=3;3_prime_UTR_variant=15;downstream_gene_variant=1	upstream_gene_variant=2;intron_variant=26;feature_elongation=2;feature_truncation=5;synonymous_variant=1;downstream_gene_variant=38	0	1	1	0	1	51	49.17	29.67	21.08	0.49	0.61	0.72	0.63	cons	CONS
protein_coding	Slc13a3	ENSMUST00000029208	ENSMUST00000109279	protein_coding	protein_coding	TRUE	TRUE	downstream_gene_variant=1;3_prime_UTR_variant=16;feature_truncation=54;intron_variant=863;feature_elongation=48;missense_variant=2;synonymous_variant=8;splice_region_variant=1	downstream_gene_variant=1;3_prime_UTR_variant=16;feature_truncation=54;intron_variant=863;feature_elongation=48;missense_variant=2;synonymous_variant=8;splice_region_variant=1	0	0	0	1	1	36.5	53.33	22.17	22.83	0.42	0.66	0.71	0.45	cons	CONS
protein_coding	Ppp1r3e	ENSMUST00000177403	ENSMUST00000168622	protein_coding	protein_coding	TRUE	FALSE	downstream_gene_variant=3;intron_variant=43;feature_truncation=6;3_prime_UTR_variant=5;splice_region_variant=1;feature_elongation=2;synonymous_variant=4	downstream_gene_variant=47;3_prime_UTR_variant=2;intron_variant=2;synonymous_variant=4	0	1	1	0	0	9.33	5.67	6.08	1.33	0.52	0.07	0.37	0.17	trans	CIS
protein_coding	Urgcp	ENSMUST00000093362	ENSMUST00000120306	protein_coding	protein_coding	TRUE	TRUE	3_prime_UTR_variant=13;feature_truncation=27;synonymous_variant=1;intron_variant=224;feature_elongation=17;upstream_gene_variant=44	downstream_gene_variant=6;3_prime_UTR_variant=7;feature_truncation=46;synonymous_variant=1;intron_variant=403;feature_elongation=27;5_prime_UTR_variant=7;upstream_gene_variant=7	1	0	0	1	0	35.67	36.5	29.92	19.42	0.34	0.45	0.14	0.5	NA	CONS
protein_coding	Zranb1	ENSMUST00000106157	ENSMUST00000033265	protein_coding	protein_coding	TRUE	FALSE	intron_variant=271;feature_truncation=22;feature_elongation=32;synonymous_variant=1;3_prime_UTR_variant=7	upstream_gene_variant=21;intron_variant=167;feature_elongation=17;feature_truncation=8;synonymous_variant=1;3_prime_UTR_variant=1;downstream_gene_variant=6	1	0	0	1	0	65.5	45.5	34.75	32.5	0.95	0.56	0.96	0.86	trans	CONS
protein_coding	AC240744.1	ENSMUST00000178451	ENSMUST00000178995	protein_coding	protein_coding	TRUE	TRUE	intron_variant=14;3_prime_UTR_variant=1	upstream_gene_variant=3;intron_variant=1;3_prime_UTR_variant=1	1	0	0	0	1	49.33	63.67	9.5	32.08	0.17	0.78	0	0.66	NA	Not in Dataset
protein_coding	1110001A16Rik	ENSMUST00000063817	ENSMUST00000180077	protein_coding	protein_coding	TRUE	FALSE	upstream_gene_variant=4;5_prime_UTR_variant=3;intron_variant=48;feature_truncation=7;feature_elongation=8;missense_variant=1;3_prime_UTR_variant=6;downstream_gene_variant=2	upstream_gene_variant=4;5_prime_UTR_variant=1;intron_variant=50;feature_truncation=7;feature_elongation=8;missense_variant=1;3_prime_UTR_variant=6;downstream_gene_variant=2	0	0	0	0	1	35.5	35.17	40.83	24.75	0.51	0.43	0.54	0.4	cons	CIS
protein_coding	Smcr7	ENSMUST00000018743	ENSMUST00000154890	protein_coding	retained_intron	TRUE	NA	upstream_gene_variant=1;intron_variant=13;feature_elongation=1;synonymous_variant=2;missense_variant=3;3_prime_UTR_variant=5;feature_truncation=1	upstream_gene_variant=1;intron_variant=12;nc_transcript_variant=17;non_coding_exon_variant=5;feature_elongation=1;downstream_gene_variant=6	0	0	1	1	1	101.33	68.67	77	36.67	0.72	0.82	0.84	0.97	NA	CIS
protein_coding	Vim	ENSMUST00000028062	ENSMUST00000148248	protein_coding	retained_intron	TRUE	NA	upstream_gene_variant=3;5_prime_UTR_variant=5;feature_truncation=8;feature_elongation=9;synonymous_variant=11;intron_variant=78;splice_region_variant=1;3_prime_UTR_variant=3;downstream_gene_variant=1	upstream_gene_variant=50;non_coding_exon_variant=4;nc_transcript_variant=39;intron_variant=35;feature_elongation=4;feature_truncation=2;downstream_gene_variant=4	1	0	0	1	0	71.67	71.67	26.5	23.42	0.9	0.85	0.83	0.82	NA	Not in Dataset
protein_coding	Utp11l	ENSMUST00000030738	ENSMUST00000153088	protein_coding	processed_transcript	TRUE	NA	downstream_gene_variant=4;3_prime_UTR_variant=4;feature_elongation=22;intron_variant=160;synonymous_variant=3;feature_truncation=9;splice_region_variant=1;5_prime_UTR_variant=1	downstream_gene_variant=8;intron_variant=129;nc_transcript_variant=164;non_coding_exon_variant=35;feature_truncation=9;feature_elongation=21	0	0	1	1	1	70.5	69.33	43.5	34.67	0.84	0.81	0.76	0.83	cons	CONS
protein_coding	Exoc7	ENSMUST00000106411	ENSMUST00000139699	protein_coding	processed_transcript	TRUE	NA	downstream_gene_variant=13;3_prime_UTR_variant=11;synonymous_variant=8;intron_variant=258;feature_elongation=16;missense_variant=3;splice_region_variant=5;feature_truncation=15;5_prime_UTR_variant=1;upstream_gene_variant=7	downstream_gene_variant=13;non_coding_exon_variant=24;nc_transcript_variant=281;intron_variant=257;feature_elongation=16;splice_region_variant=5;feature_truncation=15;upstream_gene_variant=7	0	0	0	0	1	86.83	82.5	35.5	37.83	0.98	0.96	0.98	0.99	cons	CONS
protein_coding	Id1	ENSMUST00000038368	ENSMUST00000109824	protein_coding	protein_coding	TRUE	TRUE	5_prime_UTR_variant=1;intron_variant=2;3_prime_UTR_variant=3	5_prime_UTR_variant=1;missense_variant=1;synonymous_variant=1;3_prime_UTR_variant=3	0	0	0	0	1	71.67	71.5	16.17	69	0.93	0.83	0.57	0.97	cons	CIS&TRANS
protein_coding	Tifa	ENSMUST00000054483	ENSMUST00000171621	protein_coding	protein_coding	TRUE	FALSE	5_prime_UTR_variant=2;intron_variant=66;feature_truncation=5;feature_elongation=4;splice_region_variant=1;synonymous_variant=2;3_prime_UTR_variant=25;downstream_gene_variant=60	upstream_gene_variant=21;5_prime_UTR_variant=1;feature_elongation=4;intron_variant=46;feature_truncation=3;splice_region_variant=1;synonymous_variant=2;3_prime_UTR_variant=25;downstream_gene_variant=60	1	0	0	1	0	35	28.5	4.5	20.83	0.08	0.33	0.12	0.54	NA	CIS&TRANS
protein_coding	Eif2ak1	ENSMUST00000100487	ENSMUST00000140013	protein_coding	retained_intron	TRUE	NA	upstream_gene_variant=1;5_prime_UTR_variant=4;feature_truncation=28;missense_variant=2;intron_variant=412;feature_elongation=31;synonymous_variant=5;splice_region_variant=1;3_prime_UTR_variant=16;downstream_gene_variant=2	upstream_gene_variant=3;non_coding_exon_variant=15;nc_transcript_variant=177;feature_truncation=10;intron_variant=162;feature_elongation=14;downstream_gene_variant=69	0	1	1	0	0	110.33	84.83	57.08	47.25	1	0.98	0.99	0.99	NA	CIS&TRANS
protein_coding	Slc9a3r2	ENSMUST00000002572	ENSMUST00000019684	protein_coding	protein_coding	TRUE	TRUE	3_prime_UTR_variant=3;synonymous_variant=4;intron_variant=41;missense_variant=3;feature_elongation=1;feature_truncation=1;5_prime_UTR_variant=1	3_prime_UTR_variant=3;synonymous_variant=1;intron_variant=14;missense_variant=2;upstream_gene_variant=30	1	0	0	0	0	60	77.33	32.83	32.42	0.46	0.88	0.64	0.9	cis	CONS
protein_coding	Daglb	ENSMUST00000045593	ENSMUST00000174273	protein_coding	retained_intron	TRUE	NA	upstream_gene_variant=1;5_prime_UTR_variant=4;synonymous_variant=11;intron_variant=560;feature_elongation=49;feature_truncation=44;missense_variant=2;splice_region_variant=1;3_prime_UTR_variant=18;downstream_gene_variant=1	upstream_gene_variant=70;non_coding_exon_variant=39;nc_transcript_variant=39;feature_elongation=2;feature_truncation=1;downstream_gene_variant=84	1	1	0	0	0	97.17	87	53.42	38.25	0.99	0.99	0.99	0.99	cons	CIS
protein_coding	D1Ertd622e	ENSMUST00000153115	ENSMUST00000053033	protein_coding	protein_coding	TRUE	FALSE	downstream_gene_variant=1;3_prime_UTR_variant=7;feature_elongation=17;intron_variant=154;feature_truncation=11;5_prime_UTR_variant=10;upstream_gene_variant=2	downstream_gene_variant=1;3_prime_UTR_variant=7;feature_elongation=17;intron_variant=163;feature_truncation=11;5_prime_UTR_variant=2;upstream_gene_variant=1	1	0	0	0	0	23.5	20.33	5.75	5.5	0.24	0.23	0.34	0.45	cons	CONS
protein_coding	Maf	ENSMUST00000069009	ENSMUST00000109104	protein_coding	protein_coding	TRUE	TRUE	downstream_gene_variant=1;3_prime_UTR_variant=2;intron_variant=172;feature_elongation=26;feature_truncation=18;upstream_gene_variant=5	downstream_gene_variant=51;3_prime_UTR_variant=35;feature_truncation=8;feature_elongation=12;5_prime_UTR_variant=4;upstream_gene_variant=1	0	1	1	0	1	32.67	26.67	16.5	19.17	0.28	0.3	0.15	0.14	cons	CONS
protein_coding	Ube2j1	ENSMUST00000124992	ENSMUST00000135924	protein_coding	protein_coding	TRUE	TRUE	intron_variant=227;feature_elongation=21;feature_truncation=18;splice_region_variant=1;synonymous_variant=2;missense_variant=1;3_prime_UTR_variant=12;downstream_gene_variant=1	upstream_gene_variant=61;intron_variant=167;feature_elongation=14;feature_truncation=8;splice_region_variant=1;synonymous_variant=1;3_prime_UTR_variant=12;downstream_gene_variant=1	1	0	0	0	1	90.83	75.67	41.5	34.58	0.99	0.85	0.92	0.82	cis	CONS
protein_coding	Atg4c	ENSMUST00000030279	ENSMUST00000180278	protein_coding	protein_coding	TRUE	FALSE	upstream_gene_variant=1;5_prime_UTR_variant=4;intron_variant=764;feature_elongation=60;feature_truncation=57;splice_region_variant=2;synonymous_variant=7;missense_variant=1;3_prime_UTR_variant=21	upstream_gene_variant=4;intron_variant=765;feature_elongation=60;feature_truncation=57;splice_region_variant=2;synonymous_variant=7;missense_variant=1;3_prime_UTR_variant=21	0	0	1	1	1	32.17	23.17	8.5	5.17	0.2	0.26	0.5	0.59	cons	CONS
protein_coding	Rsrc2	ENSMUST00000050827	ENSMUST00000111515	protein_coding	protein_coding	TRUE	TRUE	3_prime_UTR_variant=2;intron_variant=149;feature_truncation=20;synonymous_variant=1;feature_elongation=12	downstream_gene_variant=30;3_prime_UTR_variant=16;feature_elongation=11;intron_variant=106;feature_truncation=16	0	1	0	0	1	102.67	82	42	38.25	0.96	0.92	0.77	0.92	cons	CONS
protein_coding	Cd2bp2	ENSMUST00000166791	ENSMUST00000035771	protein_coding	protein_coding	TRUE	FALSE	downstream_gene_variant=2;3_prime_UTR_variant=25;feature_truncation=4;feature_elongation=3;intron_variant=5;synonymous_variant=3;missense_variant=1;upstream_gene_variant=2	downstream_gene_variant=26;3_prime_UTR_variant=1;intron_variant=5;synonymous_variant=3;missense_variant=1;upstream_gene_variant=2	1	0	0	1	1	66	61.5	35.83	37.5	0.89	0.69	0.87	0.65	cis	CONS
protein_coding	Rab7l1	ENSMUST00000112386	ENSMUST00000027693	protein_coding	protein_coding	TRUE	FALSE	5_prime_UTR_variant=1;synonymous_variant=4;intron_variant=84;feature_elongation=10;feature_truncation=5;missense_variant=1;3_prime_UTR_variant=2;downstream_gene_variant=2	5_prime_UTR_variant=1;synonymous_variant=4;intron_variant=84;feature_elongation=10;feature_truncation=5;missense_variant=1;3_prime_UTR_variant=4	0	0	1	1	1	47.33	56.17	23	24.33	0.56	0.63	0.3	0.56	cons	CONS
protein_coding	Ftsjd2	ENSMUST00000024816	ENSMUST00000138939	protein_coding	retained_intron	TRUE	NA	upstream_gene_variant=57;intron_variant=212;feature_elongation=21;feature_truncation=27;synonymous_variant=2;3_prime_UTR_variant=14	upstream_gene_variant=22;intron_variant=67;nc_transcript_variant=71;feature_truncation=8;feature_elongation=7;non_coding_exon_variant=4;downstream_gene_variant=11	1	0	0	1	1	47.33	56.33	19.25	33.5	0.5	0.63	0.6	0.81	cons	CONS
protein_coding	Ryk	ENSMUST00000175883	ENSMUST00000035142	protein_coding	protein_coding	TRUE	TRUE	intron_variant=359;feature_truncation=32;feature_elongation=51;3_prime_UTR_variant=7;downstream_gene_variant=12	intron_variant=359;feature_truncation=32;feature_elongation=52;3_prime_UTR_variant=16;downstream_gene_variant=3	0	0	1	1	1	42.17	68	12.5	25.25	0.53	0.76	0.34	0.71	NA	CONS
protein_coding	Wash	ENSMUST00000072383	ENSMUST00000116556	protein_coding	protein_coding	TRUE	FALSE	upstream_gene_variant=3;feature_elongation=11;5_prime_UTR_variant=3;splice_region_variant=6;intron_variant=113;feature_truncation=7;synonymous_variant=11;3_prime_UTR_variant=26;downstream_gene_variant=1	upstream_gene_variant=5;5_prime_UTR_variant=4;intron_variant=110;feature_elongation=10;feature_truncation=7;splice_region_variant=5;synonymous_variant=11;3_prime_UTR_variant=26;downstream_gene_variant=1	0	0	1	0	1	48.83	38.67	23.58	19.25	0.74	0.43	0.64	0.45	cis	Not in Dataset
protein_coding	Ostf1	ENSMUST00000025631	ENSMUST00000156908	protein_coding	retained_intron	TRUE	NA	3_prime_UTR_variant=21;feature_elongation=51;feature_truncation=40;synonymous_variant=2;missense_variant=1;intron_variant=771;splice_region_variant=1;5_prime_UTR_variant=3	downstream_gene_variant=14;non_coding_exon_variant=41;nc_transcript_variant=783;intron_variant=742;feature_truncation=38;feature_elongation=49;upstream_gene_variant=1	0	0	1	1	1	108.83	87.5	50.42	61.92	0.94	0.97	0.92	0.99	cons	CONS
protein_coding	Paox	ENSMUST00000026537	ENSMUST00000097967	protein_coding	protein_coding	TRUE	TRUE	intron_variant=99;splice_region_variant=1;feature_truncation=9;feature_elongation=6;synonymous_variant=1;3_prime_UTR_variant=1;downstream_gene_variant=1	intron_variant=99;feature_truncation=9;feature_elongation=6;synonymous_variant=1;3_prime_UTR_variant=1;downstream_gene_variant=1	0	0	1	0	1	202.83	90.5	135	9.17	0.39	1	0.74	0.3	trans	CIS
protein_coding	Tsr1	ENSMUST00000045807	ENSMUST00000130910	protein_coding	retained_intron	TRUE	NA	upstream_gene_variant=1;intron_variant=78;feature_truncation=11;synonymous_variant=7;feature_elongation=10;missense_variant=4;splice_region_variant=2;3_prime_UTR_variant=7;downstream_gene_variant=2	upstream_gene_variant=54;intron_variant=17;nc_transcript_variant=23;feature_elongation=2;non_coding_exon_variant=6;feature_truncation=2;splice_region_variant=1;downstream_gene_variant=9	1	0	0	1	1	38.33	68.33	23.42	18.42	0.94	0.75	0.77	0.72	NA	CONS
protein_coding	Rassf5	ENSMUST00000068564	ENSMUST00000027688	protein_coding	protein_coding	TRUE	TRUE	downstream_gene_variant=2;3_prime_UTR_variant=9;feature_truncation=14;feature_elongation=13;intron_variant=201;synonymous_variant=1;5_prime_UTR_variant=1;upstream_gene_variant=85	downstream_gene_variant=2;3_prime_UTR_variant=9;feature_truncation=41;feature_elongation=40;intron_variant=705;synonymous_variant=3;5_prime_UTR_variant=3	1	0	0	0	0	6.83	31	3	14.33	0.49	0.34	0.43	0.29	cons	CIS&TRANS
protein_coding	Ncbp2	ENSMUST00000023460	ENSMUST00000115178	protein_coding	protein_coding	TRUE	TRUE	intron_variant=22;feature_truncation=1;feature_elongation=2;3_prime_UTR_variant=5;downstream_gene_variant=10	intron_variant=22;feature_truncation=1;feature_elongation=1;3_prime_UTR_variant=1;downstream_gene_variant=14	0	0	1	1	1	71	82.5	31.17	36.33	0.65	0.9	0.89	0.78	NA	CONS
protein_coding	Nr2f2	ENSMUST00000032768	ENSMUST00000089565	protein_coding	protein_coding	TRUE	TRUE	3_prime_UTR_variant=18;feature_truncation=9;feature_elongation=9;intron_variant=37;upstream_gene_variant=15	downstream_gene_variant=17;3_prime_UTR_variant=1;feature_truncation=12;intron_variant=55;feature_elongation=12;5_prime_UTR_variant=5;upstream_gene_variant=1	1	0	0	1	0	90.17	60.5	52.67	34.58	0.82	0.66	0.93	0.93	NA	CONS
lincRNA	Gm2788	ENSMUST00000129551	ENSMUST00000147173	processed_transcript	processed_transcript	TRUE	NA	non_coding_exon_variant=10;nc_transcript_variant=52;intron_variant=42;feature_truncation=6;feature_elongation=7;downstream_gene_variant=4	upstream_gene_variant=19;intron_variant=28;nc_transcript_variant=36;feature_truncation=4;feature_elongation=5;non_coding_exon_variant=8;downstream_gene_variant=1	1	0	0	1	0	152.67	15.67	39.08	5.75	0.6	0.17	0.66	0.34	cis	Not in Dataset
protein_coding	Nedd4l	ENSMUST00000163516	ENSMUST00000080418	protein_coding	protein_coding	TRUE	TRUE	5_prime_UTR_variant=2;intron_variant=4167;feature_elongation=340;feature_truncation=287;splice_region_variant=5;synonymous_variant=9;missense_variant=1;3_prime_UTR_variant=47	upstream_gene_variant=93;5_prime_UTR_variant=5;intron_variant=2270;feature_truncation=157;feature_elongation=178;synonymous_variant=8;splice_region_variant=3;missense_variant=1;3_prime_UTR_variant=47	1	0	0	0	0	40.67	36	11.33	14.08	0.08	0.39	0.26	0.42	NA	CONS
protein_coding	Rab30	ENSMUST00000032879	ENSMUST00000107180	protein_coding	protein_coding	TRUE	FALSE	5_prime_UTR_variant=1;intron_variant=1124;feature_elongation=98;feature_truncation=79;synonymous_variant=4;3_prime_UTR_variant=8;downstream_gene_variant=2	upstream_gene_variant=57;5_prime_UTR_variant=1;intron_variant=202;feature_truncation=12;feature_elongation=25;synonymous_variant=4;3_prime_UTR_variant=2;downstream_gene_variant=8	1	0	0	1	0	14.67	17.67	7.5	8.17	0.3	0.19	0.79	0.12	CIS&TRANS	CONS
protein_coding	Dusp16	ENSMUST00000100857	ENSMUST00000149776	protein_coding	retained_intron	TRUE	NA	downstream_gene_variant=3;3_prime_UTR_variant=20;feature_elongation=91;feature_truncation=79;synonymous_variant=2;intron_variant=760;5_prime_UTR_variant=4	downstream_gene_variant=61;non_coding_exon_variant=25;nc_transcript_variant=561;feature_elongation=69;feature_truncation=59;intron_variant=536;upstream_gene_variant=8	1	1	0	0	0	59	91.17	34.83	37.75	0.99	0.98	0.98	0.98	cons	Not in Dataset
protein_coding	Chchd5	ENSMUST00000035481	ENSMUST00000137881	protein_coding	retained_intron	TRUE	NA	intron_variant=13;feature_truncation=1;3_prime_UTR_variant=2	non_coding_exon_variant=1;nc_transcript_variant=13;intron_variant=12;feature_truncation=1;downstream_gene_variant=2	0	0	1	1	1	113.17	92.33	58.92	39.5	0.99	0.99	0.94	0.95	cons	CONS
protein_coding	Actn1	ENSMUST00000021554	ENSMUST00000167327	protein_coding	protein_coding	TRUE	TRUE	3_prime_UTR_variant=6;feature_truncation=68;synonymous_variant=10;intron_variant=1070;feature_elongation=103	downstream_gene_variant=6;synonymous_variant=10;intron_variant=1070;feature_truncation=67;feature_elongation=103	0	0	1	1	1	55.5	58.17	33.33	33.58	0.92	0.62	0.85	0.78	trans	CONS
protein_coding	Srprb	ENSMUST00000035157	ENSMUST00000163567	protein_coding	retained_intron	TRUE	NA	downstream_gene_variant=1;3_prime_UTR_variant=31;feature_elongation=20;feature_truncation=23;intron_variant=170;missense_variant=2;synonymous_variant=3	downstream_gene_variant=16;non_coding_exon_variant=35;nc_transcript_variant=191;feature_truncation=22;feature_elongation=19;intron_variant=156	0	0	1	1	1	87	88.33	42.5	45.5	0.96	0.94	0.92	0.97	cons	CONS
protein_coding	Zfp513	ENSMUST00000114590	ENSMUST00000031562	protein_coding	protein_coding	TRUE	TRUE	3_prime_UTR_variant=1;synonymous_variant=1;intron_variant=6;5_prime_UTR_variant=2;upstream_gene_variant=1	3_prime_UTR_variant=1;synonymous_variant=1;intron_variant=6;upstream_gene_variant=3	0	0	1	1	1	30.17	39.5	21.33	22.58	0.51	0.42	0.87	0.69	cons	CONS
protein_coding	Vmac	ENSMUST00000067931	ENSMUST00000164907	protein_coding	protein_coding	TRUE	TRUE	3_prime_UTR_variant=5;feature_truncation=2;synonymous_variant=1;intron_variant=1;5_prime_UTR_variant=2;upstream_gene_variant=4	3_prime_UTR_variant=5;feature_truncation=2;synonymous_variant=1;intron_variant=6;upstream_gene_variant=1	1	0	0	0	0	56.5	36.83	17	12.58	0.19	0.39	0.37	0.5	cons	CONS
protein_coding	Dnajc4	ENSMUST00000025915	ENSMUST00000179118	protein_coding	protein_coding	TRUE	TRUE	intron_variant=21;feature_truncation=1;missense_variant=1;feature_elongation=2;5_prime_UTR_variant=4;upstream_gene_variant=19	intron_variant=21;feature_truncation=1;missense_variant=1;feature_elongation=2;5_prime_UTR_variant=1;upstream_gene_variant=22	0	0	1	0	1	68.67	70.83	28	54.08	0.79	0.75	0.61	0.82	cons	CONS
protein_coding	Smcr7l	ENSMUST00000023048	ENSMUST00000166030	protein_coding	protein_coding	TRUE	FALSE	upstream_gene_variant=2;5_prime_UTR_variant=3;intron_variant=49;feature_truncation=8;feature_elongation=8;synonymous_variant=5;3_prime_UTR_variant=25;downstream_gene_variant=2	upstream_gene_variant=2;5_prime_UTR_variant=4;intron_variant=48;feature_truncation=7;feature_elongation=5;synonymous_variant=5;3_prime_UTR_variant=5;downstream_gene_variant=22	0	0	1	1	1	57.17	90.67	38.33	37.42	0.98	0.96	0.95	0.93	cons	CONS
protein_coding	Nubp1	ENSMUST00000023146	ENSMUST00000142771	protein_coding	retained_intron	TRUE	NA	intron_variant=115;feature_truncation=12;synonymous_variant=9;feature_elongation=6;splice_region_variant=2;missense_variant=4;3_prime_UTR_variant=25;downstream_gene_variant=1	intron_variant=97;nc_transcript_variant=153;feature_truncation=12;non_coding_exon_variant=56;feature_elongation=6;splice_region_variant=2;downstream_gene_variant=1	0	0	1	0	1	90.33	88.17	56.5	55	0.96	0.93	0.97	0.97	cons	CONS
protein_coding	Ythdf3	ENSMUST00000108345	ENSMUST00000108346	protein_coding	protein_coding	TRUE	TRUE	upstream_gene_variant=2;5_prime_UTR_variant=6;feature_elongation=30;feature_truncation=37;intron_variant=308;synonymous_variant=2;3_prime_UTR_variant=2	upstream_gene_variant=2;5_prime_UTR_variant=6;feature_elongation=30;feature_truncation=37;intron_variant=308;synonymous_variant=2;3_prime_UTR_variant=2	0	0	0	0	1	52.83	71.17	6.67	3.92	0.58	0.75	0.55	0.62	cons	CIS&TRANS
protein_coding	Tmem126b	ENSMUST00000032843	ENSMUST00000123622	protein_coding	retained_intron	TRUE	NA	downstream_gene_variant=2;3_prime_UTR_variant=17;feature_truncation=10;missense_variant=6;synonymous_variant=2;intron_variant=88;feature_elongation=9	downstream_gene_variant=39;non_coding_exon_variant=36;nc_transcript_variant=76;feature_elongation=9;feature_truncation=9;intron_variant=40	0	1	1	0	0	116.5	93.67	47.58	58	0.99	0.98	0.98	0.98	NA	CONS
protein_coding	Klhdc10	ENSMUST00000068259	ENSMUST00000150854	protein_coding	retained_intron	TRUE	NA	intron_variant=369;feature_elongation=37;feature_truncation=35;3_prime_UTR_variant=25;downstream_gene_variant=1	upstream_gene_variant=29;non_coding_exon_variant=11;nc_transcript_variant=38;intron_variant=27;feature_truncation=2;downstream_gene_variant=26	1	0	0	1	1	78.67	94.17	38.92	40.17	0.99	0.98	0.99	0.99	cons	CONS
antisense	5430405H02Rik	ENSMUST00000153616	ENSMUST00000176134	antisense	antisense	TRUE	NA	downstream_gene_variant=2;non_coding_exon_variant=12;nc_transcript_variant=119;intron_variant=107;feature_elongation=12;feature_truncation=11;splice_region_variant=1;upstream_gene_variant=3	downstream_gene_variant=2;non_coding_exon_variant=12;nc_transcript_variant=121;intron_variant=109;feature_elongation=12;feature_truncation=11;splice_region_variant=1;upstream_gene_variant=1	0	0	1	0	1	7.17	28.83	4.17	18.67	0.49	0.3	0.29	0.37	cons	Not in Dataset
protein_coding	Tmem167b	ENSMUST00000090546	ENSMUST00000106622	protein_coding	protein_coding	TRUE	TRUE	3_prime_UTR_variant=20;feature_truncation=1;feature_elongation=4;intron_variant=18	3_prime_UTR_variant=20;feature_truncation=1;feature_elongation=4;intron_variant=18	1	0	0	0	0	61.33	78.83	12.58	19.25	0.68	0.82	1	0.73	cons	CIS
protein_coding	Arl6ip6	ENSMUST00000155517	ENSMUST00000028336	processed_transcript	protein_coding	TRUE	NA	upstream_gene_variant=1;non_coding_exon_variant=8;nc_transcript_variant=264;intron_variant=256;feature_elongation=29;feature_truncation=21;downstream_gene_variant=34	upstream_gene_variant=3;synonymous_variant=4;intron_variant=253;feature_elongation=32;feature_truncation=24;missense_variant=1;3_prime_UTR_variant=37;downstream_gene_variant=1	1	0	0	1	0	28.67	19.33	11.58	9.42	0.34	0.2	0.26	0.18	cons	CONS
protein_coding	Caml	ENSMUST00000021963	ENSMUST00000165154	protein_coding	retained_intron	TRUE	NA	upstream_gene_variant=2;5_prime_UTR_variant=1;synonymous_variant=6;intron_variant=168;feature_truncation=12;feature_elongation=10;splice_region_variant=1;3_prime_UTR_variant=3;downstream_gene_variant=1	upstream_gene_variant=97;non_coding_exon_variant=11;nc_transcript_variant=79;splice_region_variant=1;intron_variant=68;feature_truncation=7;feature_elongation=4;downstream_gene_variant=1	1	0	0	0	0	100.5	93.83	40.75	60.75	0.85	0.97	0.77	0.9	cis	Not in Dataset
protein_coding	Ate1	ENSMUST00000033139	ENSMUST00000035458	protein_coding	protein_coding	TRUE	TRUE	downstream_gene_variant=1;3_prime_UTR_variant=30;feature_truncation=73;feature_elongation=105;intron_variant=1091;synonymous_variant=4;missense_variant=1;splice_region_variant=1;5_prime_UTR_variant=1;upstream_gene_variant=8	downstream_gene_variant=1;3_prime_UTR_variant=30;feature_truncation=73;feature_elongation=105;intron_variant=1092;synonymous_variant=3;missense_variant=1;splice_region_variant=1;5_prime_UTR_variant=1;upstream_gene_variant=8	0	0	1	0	1	18	29.17	6.25	12.17	0.55	0.3	0.52	0.4	cons	CONS
protein_coding	Cd59a	ENSMUST00000040423	ENSMUST00000153312	protein_coding	processed_transcript	TRUE	NA	upstream_gene_variant=3;5_prime_UTR_variant=2;intron_variant=147;feature_truncation=12;feature_elongation=14;synonymous_variant=2;missense_variant=3;3_prime_UTR_variant=12;downstream_gene_variant=1	upstream_gene_variant=3;non_coding_exon_variant=10;nc_transcript_variant=155;intron_variant=145;feature_truncation=11;feature_elongation=14;downstream_gene_variant=12	0	0	1	1	1	340.67	94.17	200.33	71.08	0.98	0.96	0.99	0.98	cons	CIS
protein_coding	Atg4b	ENSMUST00000027502	ENSMUST00000135762	protein_coding	retained_intron	TRUE	NA	upstream_gene_variant=10;intron_variant=239;feature_truncation=26;feature_elongation=22;synonymous_variant=2;missense_variant=2;3_prime_UTR_variant=4;downstream_gene_variant=1	upstream_gene_variant=10;intron_variant=215;nc_transcript_variant=243;feature_truncation=26;feature_elongation=22;non_coding_exon_variant=28;downstream_gene_variant=5	0	0	1	1	1	95.5	96.17	44.83	51.75	0.99	0.98	0.97	0.98	cons	CONS
protein_coding	Lyrm2	ENSMUST00000062802	ENSMUST00000135833	protein_coding	retained_intron	TRUE	NA	upstream_gene_variant=4;intron_variant=11;feature_elongation=3;3_prime_UTR_variant=2;downstream_gene_variant=9	upstream_gene_variant=4;non_coding_exon_variant=10;nc_transcript_variant=17;feature_elongation=3;intron_variant=7;feature_truncation=1;downstream_gene_variant=5	0	0	1	1	1	146.67	85.5	59.92	63.5	0.88	0.87	0.71	0.58	cons	CONS
protein_coding	Hsd17b7	ENSMUST00000027989	ENSMUST00000111353	protein_coding	protein_coding	TRUE	TRUE	downstream_gene_variant=4;3_prime_UTR_variant=46;feature_elongation=20;feature_truncation=15;intron_variant=207;synonymous_variant=3;upstream_gene_variant=1	downstream_gene_variant=70;3_prime_UTR_variant=5;feature_truncation=11;intron_variant=159;feature_elongation=13;synonymous_variant=3;upstream_gene_variant=1	0	1	0	0	0	138.17	96.33	81.33	63.92	0.99	0.97	1	0.97	cis	CIS&TRANS
protein_coding	Gramd1c	ENSMUST00000179565	ENSMUST00000036174	protein_coding	protein_coding	TRUE	FALSE	downstream_gene_variant=2;3_prime_UTR_variant=18;feature_truncation=30;feature_elongation=24;intron_variant=435;synonymous_variant=6;missense_variant=3;splice_region_variant=1;5_prime_UTR_variant=2;upstream_gene_variant=63	downstream_gene_variant=2;3_prime_UTR_variant=18;feature_truncation=31;feature_elongation=28;intron_variant=481;synonymous_variant=6;missense_variant=3;splice_region_variant=1;5_prime_UTR_variant=4;upstream_gene_variant=51	1	0	0	1	0	88.5	93	40.58	39.25	0.95	0.93	0.96	0.95	cons	CONS
protein_coding	Adprhl2	ENSMUST00000102617	ENSMUST00000128188	protein_coding	processed_transcript	TRUE	NA	downstream_gene_variant=2;3_prime_UTR_variant=4;feature_elongation=1;intron_variant=25;feature_truncation=1;synonymous_variant=2;5_prime_UTR_variant=1;upstream_gene_variant=1	downstream_gene_variant=2;non_coding_exon_variant=9;nc_transcript_variant=31;feature_elongation=1;intron_variant=22;feature_truncation=1;upstream_gene_variant=2	0	0	1	1	1	74.83	76	48	25.33	0.82	0.76	0.72	0.61	cons	CONS
protein_coding	Scrn3	ENSMUST00000090811	ENSMUST00000112050	protein_coding	protein_coding	TRUE	TRUE	upstream_gene_variant=46;splice_region_variant=1;intron_variant=181;feature_elongation=18;feature_truncation=15;synonymous_variant=2;missense_variant=1;3_prime_UTR_variant=6	upstream_gene_variant=45;splice_region_variant=1;intron_variant=37;feature_elongation=9;feature_truncation=3;3_prime_UTR_variant=10;downstream_gene_variant=34	0	1	1	0	0	125.67	63.33	53.58	44.92	0.69	0.63	0.61	0.76	cons	CIS&TRANS
protein_coding	Ap2b1	ENSMUST00000018875	ENSMUST00000065692	protein_coding	protein_coding	TRUE	TRUE	upstream_gene_variant=19;5_prime_UTR_variant=3;feature_truncation=89;intron_variant=1016;feature_elongation=110;synonymous_variant=8;3_prime_UTR_variant=12;downstream_gene_variant=1	upstream_gene_variant=20;5_prime_UTR_variant=2;feature_truncation=88;intron_variant=1016;feature_elongation=110;synonymous_variant=8;downstream_gene_variant=13	0	0	1	1	1	90	96.33	42.75	44	0.96	0.95	0.98	0.95	cons	CONS
protein_coding	4933407H18Rik	ENSMUST00000153980	ENSMUST00000087864	retained_intron	protein_coding	TRUE	NA	upstream_gene_variant=2;non_coding_exon_variant=12;nc_transcript_variant=212;intron_variant=200;feature_truncation=16;feature_elongation=11;downstream_gene_variant=18	upstream_gene_variant=6;intron_variant=215;feature_truncation=17;feature_elongation=14;synonymous_variant=5;missense_variant=3;3_prime_UTR_variant=29;downstream_gene_variant=1	0	1	1	0	1	10.17	11.17	6.83	3.67	0.07	0.11	0.12	0.12	cons	CONS
protein_coding	Bcl6	ENSMUST00000023151	ENSMUST00000135352	protein_coding	retained_intron	TRUE	NA	downstream_gene_variant=1;3_prime_UTR_variant=7;feature_elongation=22;feature_truncation=19;intron_variant=171;synonymous_variant=4;missense_variant=1;5_prime_UTR_variant=1	downstream_gene_variant=22;non_coding_exon_variant=58;nc_transcript_variant=75;feature_elongation=6;intron_variant=17;feature_truncation=3;upstream_gene_variant=34	1	1	0	0	1	104.67	99.17	53.33	70.17	0.97	0.97	0.97	0.97	cons	CIS&TRANS
protein_coding	Cables2	ENSMUST00000108891	ENSMUST00000136706	protein_coding	retained_intron	TRUE	NA	3_prime_UTR_variant=21;feature_truncation=8;feature_elongation=4;intron_variant=88;synonymous_variant=4;splice_region_variant=2;missense_variant=1;upstream_gene_variant=1	non_coding_exon_variant=39;nc_transcript_variant=114;feature_truncation=8;feature_elongation=4;intron_variant=75;splice_region_variant=2;upstream_gene_variant=1	0	0	1	1	1	86.33	90.17	44.67	53.08	0.91	0.88	0.89	0.93	cons	Not in Dataset
protein_coding	Lrrc8a	ENSMUST00000095078	ENSMUST00000139454	protein_coding	retained_intron	TRUE	NA	5_prime_UTR_variant=2;feature_elongation=11;intron_variant=103;feature_truncation=11;synonymous_variant=4;3_prime_UTR_variant=9;downstream_gene_variant=35	non_coding_exon_variant=21;nc_transcript_variant=347;feature_elongation=25;intron_variant=326;feature_truncation=21;splice_region_variant=1;downstream_gene_variant=19	0	1	0	0	0	52.33	62.67	8.42	23.42	0.68	0.61	0.37	0.43	cons	CONS
protein_coding	Kank1	ENSMUST00000049400	ENSMUST00000146647	protein_coding	protein_coding	TRUE	TRUE	intron_variant=2729;feature_elongation=218;feature_truncation=170;5_prime_UTR_variant=5;synonymous_variant=15;missense_variant=8;splice_region_variant=2;3_prime_UTR_variant=9;downstream_gene_variant=3	upstream_gene_variant=39;5_prime_UTR_variant=2;missense_variant=9;intron_variant=174;feature_truncation=13;synonymous_variant=12;feature_elongation=15;splice_region_variant=1;downstream_gene_variant=63	1	1	0	0	0	68.5	98	47.5	47.75	0.97	0.95	0.98	0.97	cons	CONS
protein_coding	Msr1	ENSMUST00000026021	ENSMUST00000170091	protein_coding	protein_coding	TRUE	TRUE	intron_variant=761;feature_elongation=54;feature_truncation=33;missense_variant=5;synonymous_variant=4;splice_region_variant=1;upstream_gene_variant=1	downstream_gene_variant=61;3_prime_UTR_variant=17;feature_truncation=23;intron_variant=486;feature_elongation=32;missense_variant=4;synonymous_variant=2;upstream_gene_variant=1	0	1	0	0	0	13	20.83	3.83	6.92	0.22	0.2	0.16	0.18	cons	CONS
protein_coding	Cmip	ENSMUST00000166750	ENSMUST00000095172	protein_coding	protein_coding	TRUE	TRUE	intron_variant=2387;feature_elongation=180;feature_truncation=159;splice_region_variant=5;synonymous_variant=2;3_prime_UTR_variant=19;downstream_gene_variant=2	upstream_gene_variant=41;intron_variant=1413;feature_elongation=94;feature_truncation=95;splice_region_variant=5;synonymous_variant=2;3_prime_UTR_variant=19;downstream_gene_variant=2	1	0	0	0	0	79.33	100	32.33	39.33	0.75	0.96	0.92	0.77	NA	Not in Dataset
protein_coding	Polr2h	ENSMUST00000021405	ENSMUST00000161038	protein_coding	processed_transcript	TRUE	NA	upstream_gene_variant=1;5_prime_UTR_variant=2;intron_variant=28;synonymous_variant=3;feature_truncation=3;feature_elongation=2;3_prime_UTR_variant=7;downstream_gene_variant=1	upstream_gene_variant=4;non_coding_exon_variant=7;nc_transcript_variant=30;intron_variant=23;feature_truncation=2;feature_elongation=1;downstream_gene_variant=8	1	0	0	1	0	64.33	99	40.58	56.08	0.94	0.95	0.95	0.96	cons	CONS
antisense	B430219N15Rik	ENSMUST00000180853	ENSMUST00000147230	antisense	antisense	TRUE	NA	non_coding_exon_variant=5;nc_transcript_variant=5;downstream_gene_variant=3	non_coding_exon_variant=5;nc_transcript_variant=8;intron_variant=3;feature_elongation=1	0	0	1	1	1	1.33	47.17	7.58	12.42	0.4	0.45	0.37	0.86	NA	Not in Dataset
protein_coding	Dhrs7b	ENSMUST00000042281	ENSMUST00000108718	protein_coding	protein_coding	TRUE	TRUE	intron_variant=415;feature_elongation=33;feature_truncation=30;synonymous_variant=3;3_prime_UTR_variant=4;downstream_gene_variant=10	intron_variant=415;feature_elongation=33;feature_truncation=32;synonymous_variant=3;3_prime_UTR_variant=14	0	0	1	1	0	162.17	100.67	84.67	45.58	0.98	0.96	0.96	0.97	NA	CIS
protein_coding	Vkorc1l1	ENSMUST00000051758	ENSMUST00000073945	protein_coding	protein_coding	TRUE	TRUE	intron_variant=309;feature_truncation=39;feature_elongation=31;3_prime_UTR_variant=11;downstream_gene_variant=1	intron_variant=309;feature_truncation=38;feature_elongation=29;3_prime_UTR_variant=2;downstream_gene_variant=10	0	0	1	1	1	99.67	85	44.42	37.42	0.77	0.81	0.74	0.9	CIS&TRANS	CONS
protein_coding	1110057K04Rik	ENSMUST00000037383	ENSMUST00000169104	protein_coding	protein_coding	TRUE	TRUE	upstream_gene_variant=3;intron_variant=790;feature_truncation=68;feature_elongation=46;synonymous_variant=4;3_prime_UTR_variant=10;downstream_gene_variant=1	upstream_gene_variant=3;intron_variant=791;feature_truncation=68;feature_elongation=46;synonymous_variant=2;3_prime_UTR_variant=11;downstream_gene_variant=1	0	0	1	0	1	90.33	66.67	37.42	30	0.52	0.63	0.45	0.66	cis	CIS
protein_coding	1600012H06Rik	ENSMUST00000052691	ENSMUST00000164837	protein_coding	protein_coding	TRUE	FALSE	intron_variant=2;3_prime_UTR_variant=2;downstream_gene_variant=5	intron_variant=1;5_prime_UTR_variant=1;3_prime_UTR_variant=2;downstream_gene_variant=5	0	0	1	1	1	81.67	39.17	22.75	13.92	0.92	0.37	0.78	0.15	cis	CIS
protein_coding	Txnl4a	ENSMUST00000145963	ENSMUST00000130675	protein_coding	processed_transcript	TRUE	NA	upstream_gene_variant=4;5_prime_UTR_variant=3;intron_variant=201;feature_truncation=19;feature_elongation=15;3_prime_UTR_variant=16;downstream_gene_variant=3	upstream_gene_variant=90;non_coding_exon_variant=4;nc_transcript_variant=74;feature_truncation=9;intron_variant=70;feature_elongation=7;downstream_gene_variant=19	1	0	0	1	0	64.5	53	22.25	22.92	0.39	0.5	0.66	0.83	cons	CONS
protein_coding	Imp4	ENSMUST00000027303	ENSMUST00000134327	protein_coding	processed_transcript	TRUE	NA	upstream_gene_variant=4;5_prime_UTR_variant=6;intron_variant=19;synonymous_variant=3;feature_truncation=4;feature_elongation=2;splice_region_variant=2;3_prime_UTR_variant=14;downstream_gene_variant=1	upstream_gene_variant=10;non_coding_exon_variant=3;nc_transcript_variant=21;intron_variant=18;feature_truncation=2;feature_elongation=1;splice_region_variant=2;downstream_gene_variant=16	1	1	0	0	0	94.83	84.83	42.17	37	0.96	0.8	0.95	0.95	NA	CONS
protein_coding	Ascc2	ENSMUST00000070257	ENSMUST00000109930	protein_coding	protein_coding	TRUE	TRUE	intron_variant=444;feature_truncation=34;feature_elongation=30;synonymous_variant=7;missense_variant=1;splice_region_variant=4;3_prime_UTR_variant=2;downstream_gene_variant=16	intron_variant=445;feature_truncation=35;feature_elongation=32;synonymous_variant=6;missense_variant=1;splice_region_variant=3;3_prime_UTR_variant=18	0	0	0	1	1	45.33	68	33.33	22.25	0.52	0.64	0.59	0.48	trans	CONS
protein_coding	Ints3	ENSMUST00000029542	ENSMUST00000071488	protein_coding	protein_coding	TRUE	FALSE	3_prime_UTR_variant=9;intron_variant=313;feature_truncation=22;feature_elongation=17;synonymous_variant=4;missense_variant=1;5_prime_UTR_variant=1	3_prime_UTR_variant=8;splice_region_variant=1;intron_variant=314;feature_truncation=22;feature_elongation=17;synonymous_variant=4;missense_variant=1;5_prime_UTR_variant=1	0	0	0	0	1	56.5	98.83	27.83	55.17	0.82	0.93	0.83	1	CIS&TRANS	CONS
protein_coding	Dsp	ENSMUST00000127906	ENSMUST00000124830	protein_coding	protein_coding	TRUE	TRUE	5_prime_UTR_variant=1;synonymous_variant=30;intron_variant=503;feature_elongation=59;feature_truncation=41;splice_region_variant=1;missense_variant=2;3_prime_UTR_variant=7	5_prime_UTR_variant=1;synonymous_variant=36;intron_variant=497;feature_elongation=59;feature_truncation=41;splice_region_variant=1;missense_variant=2;3_prime_UTR_variant=7	0	0	1	0	1	33.17	38.33	13.25	15.08	0.62	0.36	0.4	0.56	trans	CONS
protein_coding	Emc1	ENSMUST00000042096	ENSMUST00000155700	protein_coding	processed_transcript	TRUE	NA	upstream_gene_variant=2;intron_variant=289;feature_truncation=24;feature_elongation=32;synonymous_variant=17;splice_region_variant=3;missense_variant=2;3_prime_UTR_variant=49	upstream_gene_variant=81;intron_variant=181;nc_transcript_variant=207;feature_truncation=15;feature_elongation=15;splice_region_variant=3;non_coding_exon_variant=26;downstream_gene_variant=43	1	0	0	1	1	82.83	94.33	34.17	37.17	0.98	0.88	0.8	0.87	trans	Not in Dataset
protein_coding	Fam134b	ENSMUST00000022881	ENSMUST00000110438	protein_coding	protein_coding	TRUE	TRUE	synonymous_variant=4;missense_variant=1;intron_variant=1671;feature_truncation=123;feature_elongation=133;3_prime_UTR_variant=5;downstream_gene_variant=3	upstream_gene_variant=30;5_prime_UTR_variant=2;intron_variant=388;feature_truncation=34;feature_elongation=27;synonymous_variant=1;3_prime_UTR_variant=3;downstream_gene_variant=5	1	0	0	1	1	133.67	99.83	49.83	66.75	0.96	0.93	0.86	0.99	cons	CONS
protein_coding	Fam100a	ENSMUST00000037843	ENSMUST00000143873	protein_coding	retained_intron	TRUE	NA	downstream_gene_variant=1;3_prime_UTR_variant=3;feature_truncation=1;intron_variant=13	downstream_gene_variant=1;non_coding_exon_variant=15;nc_transcript_variant=16;feature_truncation=1;intron_variant=1	0	0	1	1	1	127.5	91.67	78.58	69.25	0.93	0.84	0.9	0.91	NA	CONS
protein_coding	Zcchc2	ENSMUST00000119166	ENSMUST00000118196	protein_coding	protein_coding	TRUE	TRUE	upstream_gene_variant=1;5_prime_UTR_variant=2;synonymous_variant=8;intron_variant=382;feature_elongation=31;feature_truncation=23;splice_region_variant=3;missense_variant=6;3_prime_UTR_variant=15	upstream_gene_variant=2;5_prime_UTR_variant=1;synonymous_variant=8;intron_variant=390;feature_elongation=31;feature_truncation=23;splice_region_variant=3;missense_variant=6;3_prime_UTR_variant=7	0	0	1	1	1	26.83	35.17	11.5	8.42	0.29	0.32	0.29	0.45	cons	CONS
protein_coding	Cxadr	ENSMUST00000023572	ENSMUST00000114229	protein_coding	protein_coding	TRUE	TRUE	5_prime_UTR_variant=2;synonymous_variant=9;missense_variant=1;intron_variant=470;feature_elongation=40;feature_truncation=32;3_prime_UTR_variant=44;downstream_gene_variant=81	upstream_gene_variant=1;5_prime_UTR_variant=1;synonymous_variant=7;missense_variant=1;intron_variant=694;feature_elongation=66;feature_truncation=45;3_prime_UTR_variant=8	0	1	1	0	0	154.17	99	72.75	54.25	0.92	0.9	0.9	0.9	cons	CIS&TRANS
protein_coding	Llph	ENSMUST00000020444	ENSMUST00000130198	protein_coding	protein_coding	TRUE	TRUE	upstream_gene_variant=3;intron_variant=103;synonymous_variant=2;inframe_deletion=1;splice_region_variant=1;feature_elongation=7;feature_truncation=7;3_prime_UTR_variant=4	upstream_gene_variant=5;5_prime_UTR_variant=6;splice_region_variant=2;intron_variant=95;synonymous_variant=2;inframe_deletion=1;feature_elongation=7;feature_truncation=6;downstream_gene_variant=4	1	0	0	1	0	175.67	107.83	67.08	101.92	0.97	0.98	0.95	0.96	cons	CIS&TRANS
protein_coding	Ugt3a2	ENSMUST00000072403	ENSMUST00000144755	protein_coding	retained_intron	TRUE	NA	upstream_gene_variant=1;5_prime_UTR_variant=1;synonymous_variant=1;intron_variant=229;feature_truncation=18;missense_variant=4;feature_elongation=20;splice_region_variant=1;3_prime_UTR_variant=8	upstream_gene_variant=2;non_coding_exon_variant=10;nc_transcript_variant=174;intron_variant=164;feature_truncation=15;feature_elongation=14;downstream_gene_variant=43	0	1	1	0	0	1620.67	106	768.08	42	0.99	0.96	0.99	0.92	NA	CIS&TRANS
protein_coding	Kansl2	ENSMUST00000023727	ENSMUST00000116400	protein_coding	protein_coding	TRUE	TRUE	downstream_gene_variant=4;3_prime_UTR_variant=7;intron_variant=156;feature_truncation=16;feature_elongation=12;synonymous_variant=3;5_prime_UTR_variant=4;upstream_gene_variant=3	downstream_gene_variant=7;3_prime_UTR_variant=4;intron_variant=156;feature_truncation=16;feature_elongation=12;synonymous_variant=3;5_prime_UTR_variant=4;upstream_gene_variant=3	0	0	1	1	1	59	58.67	43.58	32.33	0.56	0.53	0.36	0.6	cons	Not in Dataset
protein_coding	Adss	ENSMUST00000016105	ENSMUST00000161808	protein_coding	retained_intron	TRUE	NA	3_prime_UTR_variant=17;feature_elongation=24;feature_truncation=26;intron_variant=221;5_prime_UTR_variant=2;upstream_gene_variant=1	downstream_gene_variant=16;non_coding_exon_variant=8;nc_transcript_variant=154;intron_variant=146;feature_truncation=15;feature_elongation=15;upstream_gene_variant=1	0	1	1	0	0	138.33	109.67	62.75	66.42	1	0.99	0.99	0.98	cons	CONS
protein_coding	P2ry2	ENSMUST00000037540	ENSMUST00000178340	protein_coding	protein_coding	TRUE	FALSE	3_prime_UTR_variant=29;feature_truncation=8;feature_elongation=11;missense_variant=2;synonymous_variant=3;intron_variant=130;5_prime_UTR_variant=6;upstream_gene_variant=1	downstream_gene_variant=13;3_prime_UTR_variant=16;feature_elongation=11;feature_truncation=7;missense_variant=2;synonymous_variant=3;intron_variant=131;5_prime_UTR_variant=5;upstream_gene_variant=1	0	0	1	1	1	35.33	103.67	24.75	56.92	0.85	0.92	0.72	0.85	NA	CIS&TRANS
protein_coding	Gm14378	ENSMUST00000110993	ENSMUST00000124750	protein_coding	processed_transcript	TRUE	NA	5_prime_UTR_variant=1;intron_variant=13;synonymous_variant=3;feature_elongation=3;3_prime_UTR_variant=3;feature_truncation=1;downstream_gene_variant=2	upstream_gene_variant=1;non_coding_exon_variant=3;nc_transcript_variant=4;intron_variant=1;feature_elongation=1;downstream_gene_variant=17	1	1	0	0	0	44.33	45.17	20.42	25.33	0.32	0.4	0.45	0.45	cons	Not in Dataset
protein_coding	Thoc3	ENSMUST00000026990	ENSMUST00000151158	protein_coding	processed_transcript	TRUE	NA	downstream_gene_variant=1;3_prime_UTR_variant=17;feature_elongation=6;feature_truncation=6;intron_variant=58;synonymous_variant=5	downstream_gene_variant=40;non_coding_exon_variant=5;nc_transcript_variant=41;intron_variant=36;feature_elongation=1;feature_truncation=4	0	1	1	0	1	91.33	106.33	47.67	75.25	0.99	0.94	0.98	0.97	NA	CONS
protein_coding	Dapk1	ENSMUST00000077453	ENSMUST00000044083	protein_coding	protein_coding	TRUE	FALSE	intron_variant=1962;5_prime_UTR_variant=1;feature_elongation=155;feature_truncation=118;splice_region_variant=4;synonymous_variant=12;missense_variant=2;3_prime_UTR_variant=3	upstream_gene_variant=1;5_prime_UTR_variant=2;intron_variant=1960;feature_elongation=155;feature_truncation=118;splice_region_variant=4;synonymous_variant=12;missense_variant=2;3_prime_UTR_variant=3	1	0	0	0	1	115.67	85.17	49.5	46.83	0.95	0.75	0.82	0.85	trans	CONS
protein_coding	Dcps	ENSMUST00000034539	ENSMUST00000119847	protein_coding	protein_coding	TRUE	TRUE	intron_variant=462;feature_elongation=35;feature_truncation=41;synonymous_variant=3;missense_variant=1;5_prime_UTR_variant=2;upstream_gene_variant=1	intron_variant=452;3_prime_UTR_variant=2;missense_variant=6;inframe_insertion=1;frameshift_variant=1;feature_elongation=34;synonymous_variant=4;feature_truncation=41;5_prime_UTR_variant=2;upstream_gene_variant=1	0	0	1	1	1	130.17	108.17	55.17	78.67	0.99	0.94	0.99	0.97	NA	CONS
protein_coding	Nmnat1	ENSMUST00000119921	ENSMUST00000030845	protein_coding	protein_coding	TRUE	TRUE	downstream_gene_variant=1;3_prime_UTR_variant=30;feature_truncation=16;feature_elongation=22;synonymous_variant=1;missense_variant=1;splice_region_variant=2;intron_variant=191;5_prime_UTR_variant=1;upstream_gene_variant=1	downstream_gene_variant=21;3_prime_UTR_variant=5;feature_elongation=22;synonymous_variant=3;missense_variant=2;intron_variant=193;splice_region_variant=2;feature_truncation=14;5_prime_UTR_variant=1;upstream_gene_variant=1	0	0	1	1	1	46.67	49.5	22.92	34.08	0.61	0.43	0.54	0.69	cons	Not in Dataset
protein_coding	Tars2	ENSMUST00000029752	ENSMUST00000098857	protein_coding	protein_coding	TRUE	TRUE	3_prime_UTR_variant=4;intron_variant=53;feature_truncation=7;feature_elongation=14;splice_region_variant=1;missense_variant=2;synonymous_variant=1	downstream_gene_variant=25;3_prime_UTR_variant=6;intron_variant=29;feature_elongation=9;feature_truncation=5	0	1	0	0	1	84.17	112.17	46.92	46.5	0.98	0.97	0.99	0.99	cons	CONS
protein_coding	Als2	ENSMUST00000027178	ENSMUST00000159166	protein_coding	retained_intron	TRUE	NA	3_prime_UTR_variant=8;intron_variant=575;feature_elongation=67;feature_truncation=53;synonymous_variant=21;splice_region_variant=2;missense_variant=3;5_prime_UTR_variant=1	downstream_gene_variant=54;non_coding_exon_variant=23;nc_transcript_variant=344;intron_variant=321;feature_truncation=35;feature_elongation=41;splice_region_variant=1	0	1	0	0	0	99.83	111.17	46.75	58.42	0.96	0.96	0.94	0.95	cons	CIS
protein_coding	Adam9	ENSMUST00000084035	ENSMUST00000084032	protein_coding	protein_coding	TRUE	TRUE	downstream_gene_variant=1;3_prime_UTR_variant=6;feature_elongation=53;synonymous_variant=10;intron_variant=713;feature_truncation=47;splice_region_variant=4;missense_variant=2;5_prime_UTR_variant=6;upstream_gene_variant=1	downstream_gene_variant=1;3_prime_UTR_variant=6;feature_elongation=53;missense_variant=3;intron_variant=713;feature_truncation=46;splice_region_variant=5;synonymous_variant=9;upstream_gene_variant=7	0	0	1	1	1	66	73.17	35	33.42	0.48	0.63	0.57	0.64	cons	CONS
protein_coding	Fabp5	ENSMUST00000029046	ENSMUST00000123744	protein_coding	retained_intron	TRUE	NA	upstream_gene_variant=1;5_prime_UTR_variant=2;synonymous_variant=2;intron_variant=40;feature_truncation=3;feature_elongation=4;3_prime_UTR_variant=1	upstream_gene_variant=2;non_coding_exon_variant=37;nc_transcript_variant=43;feature_truncation=3;feature_elongation=4;intron_variant=6;downstream_gene_variant=1	0	0	1	1	1	358	116.67	93.17	97	1	1	1	0.99	cons	CONS
protein_coding	Ngrn	ENSMUST00000117989	ENSMUST00000138005	protein_coding	retained_intron	TRUE	NA	upstream_gene_variant=13;5_prime_UTR_variant=2;synonymous_variant=2;missense_variant=5;intron_variant=18;feature_truncation=3;feature_elongation=3;3_prime_UTR_variant=1;downstream_gene_variant=4	upstream_gene_variant=13;non_coding_exon_variant=15;nc_transcript_variant=28;intron_variant=13;feature_truncation=3;feature_elongation=3;downstream_gene_variant=4	0	0	1	0	1	105	106.33	43.25	65.67	0.9	0.91	0.78	0.94	cons	CIS&TRANS
protein_coding	Wbscr16	ENSMUST00000076228	ENSMUST00000156574	protein_coding	retained_intron	TRUE	NA	downstream_gene_variant=1;3_prime_UTR_variant=9;intron_variant=342;feature_truncation=23;feature_elongation=32;synonymous_variant=4;missense_variant=2	downstream_gene_variant=96;non_coding_exon_variant=6;nc_transcript_variant=44;intron_variant=38;feature_elongation=4;feature_truncation=3;upstream_gene_variant=61	1	1	0	0	0	64.33	110.5	45.42	58.83	0.96	0.94	0.99	0.98	cons	CONS
protein_coding	C1qc	ENSMUST00000046332	ENSMUST00000153104	protein_coding	processed_transcript	TRUE	NA	downstream_gene_variant=3;3_prime_UTR_variant=3;synonymous_variant=2;intron_variant=22;feature_elongation=1;missense_variant=1;5_prime_UTR_variant=1	downstream_gene_variant=16;non_coding_exon_variant=14;nc_transcript_variant=15;intron_variant=1;upstream_gene_variant=1	0	1	1	0	0	189	116.67	81.17	64.75	0.99	0.99	0.99	0.99	cons	CONS
protein_coding	Rogdi	ENSMUST00000023191	ENSMUST00000090453	protein_coding	protein_coding	TRUE	TRUE	downstream_gene_variant=1;3_prime_UTR_variant=3;feature_elongation=1;intron_variant=19;synonymous_variant=6;splice_region_variant=2;feature_truncation=4;missense_variant=1;upstream_gene_variant=27	downstream_gene_variant=1;intron_variant=25;feature_elongation=1;synonymous_variant=3;splice_region_variant=1;feature_truncation=4;missense_variant=1;upstream_gene_variant=27	0	0	0	1	1	132.83	79.17	57.58	56.5	0.8	0.67	0.78	0.82	trans	CONS
protein_coding	Zfp187	ENSMUST00000032820	ENSMUST00000110485	protein_coding	protein_coding	TRUE	TRUE	3_prime_UTR_variant=18;feature_elongation=11;feature_truncation=9;synonymous_variant=2;missense_variant=3;intron_variant=66;5_prime_UTR_variant=2	downstream_gene_variant=15;3_prime_UTR_variant=3;synonymous_variant=2;missense_variant=3;intron_variant=66;feature_elongation=10;feature_truncation=8;5_prime_UTR_variant=2	0	0	1	1	1	86.33	105.17	57.33	43.75	0.93	0.88	0.9	0.89	cons	CIS&TRANS
protein_coding	Wbp11	ENSMUST00000116514	ENSMUST00000151333	protein_coding	processed_transcript	TRUE	NA	3_prime_UTR_variant=2;intron_variant=168;feature_truncation=16;feature_elongation=14;missense_variant=2;synonymous_variant=3;5_prime_UTR_variant=5	downstream_gene_variant=73;non_coding_exon_variant=29;nc_transcript_variant=105;feature_truncation=8;feature_elongation=7;intron_variant=76	0	1	1	0	0	108.17	117.17	67.42	59.33	0.99	0.98	0.99	0.98	cons	CONS
protein_coding	Npm3	ENSMUST00000070215	ENSMUST00000144165	protein_coding	retained_intron	TRUE	NA	3_prime_UTR_variant=4;feature_elongation=1;feature_truncation=2;intron_variant=12;synonymous_variant=3;missense_variant=1;upstream_gene_variant=2	downstream_gene_variant=8;non_coding_exon_variant=10;nc_transcript_variant=12;intron_variant=2;feature_truncation=1;upstream_gene_variant=2	0	1	1	0	1	148.33	115.5	82.42	60.92	0.97	0.96	0.93	0.95	cons	CONS
protein_coding	Fgfrl1	ENSMUST00000013633	ENSMUST00000112560	protein_coding	protein_coding	TRUE	TRUE	upstream_gene_variant=1;intron_variant=72;feature_elongation=6;feature_truncation=5;synonymous_variant=3;downstream_gene_variant=1	upstream_gene_variant=1;intron_variant=73;feature_elongation=6;feature_truncation=5;synonymous_variant=2;downstream_gene_variant=1	0	0	0	0	1	77.67	104.83	73.17	96.58	0.63	0.87	0.8	0.88	NA	CONS
protein_coding	Rhod	ENSMUST00000048197	ENSMUST00000117462	protein_coding	protein_coding	TRUE	TRUE	3_prime_UTR_variant=4;intron_variant=115;feature_elongation=10;feature_truncation=10;upstream_gene_variant=43	3_prime_UTR_variant=5;intron_variant=114;feature_elongation=10;feature_truncation=10;upstream_gene_variant=43	0	0	1	1	1	129	99.17	91.5	48.08	0.77	0.81	0.78	0.66	cons	CONS
protein_coding	Lipe	ENSMUST00000003207	ENSMUST00000054301	protein_coding	protein_coding	TRUE	TRUE	downstream_gene_variant=2;3_prime_UTR_variant=3;synonymous_variant=6;intron_variant=99;feature_truncation=6;feature_elongation=8;5_prime_UTR_variant=3;upstream_gene_variant=25	downstream_gene_variant=2;3_prime_UTR_variant=3;synonymous_variant=6;intron_variant=54;feature_truncation=4;feature_elongation=2;upstream_gene_variant=42	1	0	0	1	0	34.67	49	10.92	7.92	0.46	0.4	0.54	0.39	cons	CONS
protein_coding	Supt6h	ENSMUST00000002121	ENSMUST00000108314	protein_coding	retained_intron	TRUE	NA	downstream_gene_variant=26;3_prime_UTR_variant=10;feature_elongation=22;intron_variant=200;feature_truncation=16;synonymous_variant=5;splice_region_variant=2;5_prime_UTR_variant=2;upstream_gene_variant=1	downstream_gene_variant=27;non_coding_exon_variant=13;nc_transcript_variant=97;feature_elongation=9;intron_variant=84;feature_truncation=6;upstream_gene_variant=20	1	0	0	1	1	68.33	77.33	36.75	35.42	0.34	0.63	0.46	0.48	NA	CONS
protein_coding	Pak2	ENSMUST00000023467	ENSMUST00000125019	protein_coding	retained_intron	TRUE	NA	downstream_gene_variant=1;3_prime_UTR_variant=4;intron_variant=152;feature_elongation=26;feature_truncation=17;synonymous_variant=1	downstream_gene_variant=14;non_coding_exon_variant=7;nc_transcript_variant=28;feature_truncation=7;intron_variant=21;feature_elongation=6;upstream_gene_variant=6	1	1	0	0	1	43.33	59	19.92	34.17	0.78	0.48	0.92	0.48	cis	CONS
protein_coding	Fahd2a	ENSMUST00000028848	ENSMUST00000146757	protein_coding	retained_intron	TRUE	NA	intron_variant=70;feature_truncation=4;synonymous_variant=1;splice_region_variant=1;5_prime_UTR_variant=3	intron_variant=66;nc_transcript_variant=74;feature_truncation=4;non_coding_exon_variant=8;splice_region_variant=1	0	0	1	1	1	116.67	103.33	72.75	44.92	0.9	0.84	0.72	0.8	cons	CONS
protein_coding	Cish	ENSMUST00000085102	ENSMUST00000165664	protein_coding	processed_transcript	TRUE	NA	upstream_gene_variant=1;5_prime_UTR_variant=6;feature_elongation=6;synonymous_variant=2;intron_variant=44;feature_truncation=3;3_prime_UTR_variant=6;downstream_gene_variant=14	upstream_gene_variant=7;non_coding_exon_variant=46;nc_transcript_variant=51;feature_truncation=3;feature_elongation=4;intron_variant=5;downstream_gene_variant=15	0	0	1	1	1	49	76.5	29.33	38.42	0.87	0.62	0.53	0.71	NA	CONS
protein_coding	Mepce	ENSMUST00000031740	ENSMUST00000132726	protein_coding	protein_coding	TRUE	TRUE	3_prime_UTR_variant=3;feature_truncation=2;intron_variant=8;synonymous_variant=3;feature_elongation=1;inframe_deletion=1;upstream_gene_variant=1	downstream_gene_variant=3;intron_variant=11;synonymous_variant=1;feature_elongation=1;feature_truncation=2;missense_variant=1	0	0	1	1	1	90.5	96.5	50.83	59.25	0.68	0.78	0.87	0.89	NA	CONS
protein_coding	Msl1	ENSMUST00000037915	ENSMUST00000107485	protein_coding	protein_coding	TRUE	TRUE	upstream_gene_variant=1;5_prime_UTR_variant=1;intron_variant=75;feature_truncation=6;synonymous_variant=4;missense_variant=2;feature_elongation=4;3_prime_UTR_variant=14	upstream_gene_variant=2;intron_variant=37;feature_truncation=2;synonymous_variant=3;missense_variant=2;downstream_gene_variant=44	0	1	1	0	0	59.33	71.83	35.08	36.08	0.55	0.58	0.79	0.65	cons	CONS
protein_coding	Hdhd2	ENSMUST00000145634	ENSMUST00000150990	protein_coding	protein_coding	TRUE	FALSE	upstream_gene_variant=19;intron_variant=257;feature_elongation=24;feature_truncation=20;synonymous_variant=2;3_prime_UTR_variant=2;downstream_gene_variant=27	upstream_gene_variant=18;5_prime_UTR_variant=1;intron_variant=256;feature_elongation=26;feature_truncation=22;synonymous_variant=2;3_prime_UTR_variant=26;downstream_gene_variant=3	1	0	0	1	0	132.83	115.5	79.25	41	0.94	0.93	0.97	0.9	cons	CONS
protein_coding	Hipk1	ENSMUST00000118317	ENSMUST00000135634	protein_coding	retained_intron	TRUE	NA	downstream_gene_variant=1;3_prime_UTR_variant=16;feature_elongation=31;feature_truncation=49;intron_variant=317;synonymous_variant=13;missense_variant=1;splice_region_variant=1;5_prime_UTR_variant=2	downstream_gene_variant=33;non_coding_exon_variant=16;nc_transcript_variant=270;intron_variant=254;feature_truncation=42;feature_elongation=24;upstream_gene_variant=2	1	1	0	0	0	61.5	121.83	32.58	54.33	0.99	0.97	0.96	0.99	cons	CIS&TRANS
protein_coding	Idnk	ENSMUST00000051490	ENSMUST00000109868	protein_coding	protein_coding	TRUE	TRUE	upstream_gene_variant=1;5_prime_UTR_variant=2;intron_variant=66;feature_truncation=5;feature_elongation=5;missense_variant=1;synonymous_variant=1;3_prime_UTR_variant=11	upstream_gene_variant=1;5_prime_UTR_variant=2;intron_variant=66;feature_truncation=5;feature_elongation=5;missense_variant=1;3_prime_UTR_variant=12	0	0	0	0	1	99.5	80	55.17	62.25	0.58	0.63	0.65	0.72	cons	Not in Dataset
protein_coding	Trib1	ENSMUST00000067543	ENSMUST00000118228	protein_coding	protein_coding	TRUE	TRUE	5_prime_UTR_variant=5;feature_elongation=6;intron_variant=35;splice_region_variant=1;synonymous_variant=4;feature_truncation=4;3_prime_UTR_variant=20;downstream_gene_variant=3	upstream_gene_variant=1;5_prime_UTR_variant=4;feature_elongation=6;intron_variant=13;splice_region_variant=1;synonymous_variant=2;3_prime_UTR_variant=20;feature_truncation=3;downstream_gene_variant=27	0	1	1	0	0	85.17	119.5	77.25	68.67	0.96	0.94	0.94	0.94	cons	CIS&TRANS
protein_coding	Lrrc28	ENSMUST00000053950	ENSMUST00000032775	protein_coding	protein_coding	TRUE	TRUE	3_prime_UTR_variant=20;feature_truncation=82;feature_elongation=100;intron_variant=1247;synonymous_variant=3;5_prime_UTR_variant=1;upstream_gene_variant=2	downstream_gene_variant=53;3_prime_UTR_variant=9;feature_elongation=43;intron_variant=479;feature_truncation=33;5_prime_UTR_variant=1;upstream_gene_variant=2	0	1	1	0	0	72	99.17	52.92	57.33	0.86	0.78	0.83	0.87	NA	CONS
protein_coding	2510002D24Rik	ENSMUST00000055413	ENSMUST00000123146	protein_coding	processed_transcript	TRUE	NA	intron_variant=39;splice_region_variant=1;feature_elongation=3;feature_truncation=3;3_prime_UTR_variant=16;downstream_gene_variant=3	intron_variant=10;nc_transcript_variant=11;splice_region_variant=1;feature_elongation=2;feature_truncation=1;non_coding_exon_variant=1;downstream_gene_variant=47	0	1	1	0	0	142.67	123.5	83.08	53.67	0.94	0.97	0.93	0.99	cons	CIS&TRANS
protein_coding	Atp6v1b2	ENSMUST00000006435	ENSMUST00000153079	protein_coding	retained_intron	TRUE	NA	upstream_gene_variant=2;intron_variant=173;feature_truncation=14;feature_elongation=22;synonymous_variant=7;splice_region_variant=3;3_prime_UTR_variant=8;downstream_gene_variant=1	upstream_gene_variant=2;intron_variant=95;nc_transcript_variant=114;feature_truncation=12;feature_elongation=18;non_coding_exon_variant=19;splice_region_variant=1;downstream_gene_variant=64	0	1	1	0	0	136.33	126.17	65	58.42	1	0.99	0.99	0.99	cons	CIS
protein_coding	Zyx	ENSMUST00000070635	ENSMUST00000164375	protein_coding	protein_coding	TRUE	FALSE	5_prime_UTR_variant=2;intron_variant=27;feature_truncation=3;feature_elongation=1;3_prime_UTR_variant=1;downstream_gene_variant=5	upstream_gene_variant=1;5_prime_UTR_variant=1;intron_variant=30;feature_truncation=4;feature_elongation=1;3_prime_UTR_variant=2;downstream_gene_variant=1	0	1	1	0	0	154	118.67	95.83	64.83	0.98	0.93	0.88	0.96	NA	CONS
protein_coding	Ubr2	ENSMUST00000113337	ENSMUST00000113335	protein_coding	protein_coding	TRUE	TRUE	3_prime_UTR_variant=15;feature_elongation=69;intron_variant=1028;feature_truncation=77;synonymous_variant=15;missense_variant=2;splice_region_variant=6;5_prime_UTR_variant=1	3_prime_UTR_variant=15;feature_elongation=69;intron_variant=1028;feature_truncation=77;synonymous_variant=15;missense_variant=2;splice_region_variant=6;5_prime_UTR_variant=1	0	0	0	0	1	37	48.67	19.75	7.25	0.54	0.38	0.3	0.42	cons	CONS
protein_coding	Casp6	ENSMUST00000029626	ENSMUST00000152622	protein_coding	retained_intron	TRUE	NA	intron_variant=206;feature_truncation=10;feature_elongation=7;splice_region_variant=1;synonymous_variant=5;missense_variant=2;3_prime_UTR_variant=3	upstream_gene_variant=117;non_coding_exon_variant=8;nc_transcript_variant=57;intron_variant=49;downstream_gene_variant=3	1	0	0	1	0	131.83	119.17	61.42	70.67	0.86	0.93	0.93	0.76	NA	CIS&TRANS
protein_coding	Npc1	ENSMUST00000025279	ENSMUST00000133112	protein_coding	retained_intron	TRUE	NA	3_prime_UTR_variant=15;feature_truncation=46;intron_variant=662;feature_elongation=56;synonymous_variant=15;splice_region_variant=2;missense_variant=6	downstream_gene_variant=72;non_coding_exon_variant=93;nc_transcript_variant=285;feature_elongation=25;feature_truncation=20;intron_variant=192	0	1	1	0	0	184	127	102.08	59.75	0.99	0.99	0.99	0.99	cons	CIS&TRANS
protein_coding	Psmd5	ENSMUST00000028225	ENSMUST00000143456	protein_coding	retained_intron	TRUE	NA	downstream_gene_variant=1;3_prime_UTR_variant=3;intron_variant=111;feature_truncation=6;synonymous_variant=5;feature_elongation=6;upstream_gene_variant=14	downstream_gene_variant=1;non_coding_exon_variant=11;nc_transcript_variant=119;intron_variant=108;feature_truncation=6;feature_elongation=6;upstream_gene_variant=14	0	0	1	1	1	144.67	126	80.75	63.67	0.99	0.98	0.99	0.98	cons	CIS
protein_coding	Rara	ENSMUST00000107475	ENSMUST00000107473	protein_coding	protein_coding	TRUE	TRUE	upstream_gene_variant=37;5_prime_UTR_variant=3;intron_variant=179;feature_truncation=23;feature_elongation=35;3_prime_UTR_variant=3;downstream_gene_variant=5	upstream_gene_variant=32;intron_variant=38;feature_elongation=9;feature_truncation=5;3_prime_UTR_variant=6;downstream_gene_variant=2	1	0	0	1	0	57.67	53	25.58	38.33	0.31	0.41	0.25	0.38	cons	CONS
protein_coding	Bivm	ENSMUST00000155917	ENSMUST00000114709	processed_transcript	protein_coding	TRUE	NA	upstream_gene_variant=78;non_coding_exon_variant=7;nc_transcript_variant=89;feature_elongation=6;feature_truncation=7;intron_variant=82;downstream_gene_variant=64	upstream_gene_variant=71;intron_variant=305;feature_truncation=17;feature_elongation=22;missense_variant=2;synonymous_variant=8;3_prime_UTR_variant=17;downstream_gene_variant=16	1	1	0	0	0	20.83	27.17	2.58	0.92	0.12	0.21	0.52	0.5	cons	CONS
protein_coding	AI314976	ENSMUST00000167180	ENSMUST00000046651	protein_coding	protein_coding	TRUE	FALSE	upstream_gene_variant=2;5_prime_UTR_variant=2;intron_variant=44;feature_elongation=3;missense_variant=1;feature_truncation=4;3_prime_UTR_variant=3	upstream_gene_variant=4;intron_variant=44;feature_elongation=3;missense_variant=1;feature_truncation=4;3_prime_UTR_variant=3	0	0	1	1	1	80.17	66.17	44.75	47.25	0.52	0.51	0.58	0.58	cons	CONS
protein_coding	Plk3	ENSMUST00000076859	ENSMUST00000126135	protein_coding	processed_transcript	TRUE	NA	downstream_gene_variant=15;intron_variant=13;feature_elongation=4;feature_truncation=3;missense_variant=1;synonymous_variant=1	downstream_gene_variant=15;intron_variant=12;nc_transcript_variant=15;feature_elongation=4;feature_truncation=3;non_coding_exon_variant=3	0	0	1	0	1	87.67	76	35.25	56.5	0.85	0.58	0.32	0.65	trans	CIS
protein_coding	Dph1	ENSMUST00000044949	ENSMUST00000156489	protein_coding	retained_intron	TRUE	NA	downstream_gene_variant=1;3_prime_UTR_variant=3;feature_elongation=6;intron_variant=103;missense_variant=1;synonymous_variant=5;feature_truncation=9;upstream_gene_variant=3	downstream_gene_variant=2;non_coding_exon_variant=12;nc_transcript_variant=41;intron_variant=29;feature_truncation=4;feature_elongation=3;upstream_gene_variant=39	1	0	0	1	1	123.5	127.17	66	58.67	0.98	0.97	0.95	0.95	cons	CONS
protein_coding	Mul1	ENSMUST00000044058	ENSMUST00000105813	protein_coding	protein_coding	TRUE	TRUE	intron_variant=4;feature_elongation=1;feature_truncation=1;3_prime_UTR_variant=5	intron_variant=4;feature_elongation=1;feature_truncation=1;3_prime_UTR_variant=5	0	0	1	1	1	80.67	89.33	36.08	4.17	0.71	0.68	0.79	0.5	cons	CONS
protein_coding	Tsfm	ENSMUST00000040560	ENSMUST00000120547	protein_coding	protein_coding	TRUE	TRUE	downstream_gene_variant=80;3_prime_UTR_variant=3;feature_truncation=5;synonymous_variant=5;intron_variant=108;splice_region_variant=2;feature_elongation=4;upstream_gene_variant=1	downstream_gene_variant=66;3_prime_UTR_variant=10;synonymous_variant=4;splice_region_variant=2;intron_variant=91;feature_elongation=4;feature_truncation=4;upstream_gene_variant=1	0	1	1	0	0	126.5	127.5	84.33	79.17	0.97	0.97	0.99	0.98	cons	CONS
protein_coding	Nap1l1	ENSMUST00000065917	ENSMUST00000171797	protein_coding	protein_coding	TRUE	TRUE	intron_variant=39;feature_truncation=6;feature_elongation=8;synonymous_variant=1;downstream_gene_variant=1	upstream_gene_variant=7;5_prime_UTR_variant=1;intron_variant=25;feature_truncation=4;feature_elongation=5;synonymous_variant=1;3_prime_UTR_variant=1	1	0	0	1	1	146.83	87	41.08	36.5	0.69	0.66	0.57	0.64	cons	CONS
protein_coding	Crls1	ENSMUST00000028835	ENSMUST00000124836	protein_coding	protein_coding	TRUE	TRUE	upstream_gene_variant=45;5_prime_UTR_variant=1;missense_variant=1;synonymous_variant=3;inframe_insertion=2;intron_variant=246;feature_elongation=18;feature_truncation=15;splice_region_variant=1;3_prime_UTR_variant=12;downstream_gene_variant=1	upstream_gene_variant=42;intron_variant=243;feature_elongation=17;feature_truncation=15;synonymous_variant=2;splice_region_variant=1;3_prime_UTR_variant=8;downstream_gene_variant=5	1	0	0	1	0	205	119.33	116.75	72.5	0.91	0.9	0.89	0.97	cons	CIS&TRANS
protein_coding	Rsbn1	ENSMUST00000051139	ENSMUST00000106806	protein_coding	protein_coding	TRUE	FALSE	intron_variant=71;feature_elongation=14;feature_truncation=6;3_prime_UTR_variant=1	intron_variant=70;feature_elongation=14;feature_truncation=6;3_prime_UTR_variant=2	0	0	1	1	1	4.5	6.67	2.42	2	0.45	0.05	0.6	0.4	NA	CONS
protein_coding	Sdsl	ENSMUST00000052258	ENSMUST00000031594	protein_coding	protein_coding	TRUE	FALSE	3_prime_UTR_variant=1;intron_variant=180;synonymous_variant=3;feature_elongation=16;feature_truncation=11;upstream_gene_variant=2	3_prime_UTR_variant=1;intron_variant=175;synonymous_variant=3;feature_elongation=16;feature_truncation=11;5_prime_UTR_variant=6;upstream_gene_variant=1	0	0	1	1	1	46.17	92.5	64.83	35.75	0.6	0.69	0.68	0.73	cons	CONS
protein_coding	Ogfr	ENSMUST00000029087	ENSMUST00000147070	protein_coding	retained_intron	TRUE	NA	upstream_gene_variant=2;intron_variant=24;feature_elongation=1;synonymous_variant=4;splice_region_variant=1;missense_variant=4;3_prime_UTR_variant=4;downstream_gene_variant=3	upstream_gene_variant=2;intron_variant=20;nc_transcript_variant=21;feature_elongation=1;non_coding_exon_variant=1;downstream_gene_variant=18	0	1	1	0	0	160	123.5	100.42	64.92	0.99	0.92	0.97	0.9	NA	CONS
protein_coding	Rdh11	ENSMUST00000161204	ENSMUST00000085254	protein_coding	protein_coding	TRUE	TRUE	downstream_gene_variant=1;3_prime_UTR_variant=24;feature_elongation=8;feature_truncation=9;intron_variant=116;synonymous_variant=3;missense_variant=1;5_prime_UTR_variant=4	downstream_gene_variant=22;3_prime_UTR_variant=3;intron_variant=106;feature_truncation=6;feature_elongation=6;synonymous_variant=3;missense_variant=1;5_prime_UTR_variant=1;upstream_gene_variant=13	1	0	0	1	0	302.33	105.33	156.33	113.33	0.83	0.78	0.78	0.75	cons	CIS&TRANS
protein_coding	Mrpl39	ENSMUST00000116584	ENSMUST00000133901	protein_coding	processed_transcript	TRUE	NA	3_prime_UTR_variant=6;feature_elongation=9;synonymous_variant=4;missense_variant=5;intron_variant=112;splice_region_variant=1;feature_truncation=13;5_prime_UTR_variant=14;upstream_gene_variant=1	downstream_gene_variant=44;intron_variant=5;nc_transcript_variant=6;feature_truncation=1;non_coding_exon_variant=1;upstream_gene_variant=15	0	1	1	0	0	144	116.33	78.5	73.08	0.7	0.86	0.82	0.79	NA	CONS
protein_coding	8430419L09Rik	ENSMUST00000111915	ENSMUST00000151951	protein_coding	retained_intron	TRUE	NA	intron_variant=505;feature_truncation=38;feature_elongation=35;synonymous_variant=16;missense_variant=1;splice_region_variant=1;3_prime_UTR_variant=28;downstream_gene_variant=55	upstream_gene_variant=91;non_coding_exon_variant=4;nc_transcript_variant=14;intron_variant=10;feature_truncation=2;downstream_gene_variant=58	1	0	0	1	0	60.83	121.83	35.17	43.17	0.97	0.9	0.97	0.96	trans	CIS&TRANS
protein_coding	Stat5b	ENSMUST00000004143	ENSMUST00000107358	protein_coding	protein_coding	TRUE	FALSE	3_prime_UTR_variant=13;feature_elongation=71;feature_truncation=54;synonymous_variant=6;intron_variant=649;splice_region_variant=4;5_prime_UTR_variant=1;upstream_gene_variant=1	3_prime_UTR_variant=13;feature_elongation=33;feature_truncation=33;synonymous_variant=6;intron_variant=377;splice_region_variant=4;5_prime_UTR_variant=6;upstream_gene_variant=48	1	0	0	0	0	78.83	98.83	45.33	43.5	0.74	0.73	0.9	0.71	cons	CIS
protein_coding	Hlcs	ENSMUST00000163193	ENSMUST00000099512	protein_coding	protein_coding	TRUE	FALSE	3_prime_UTR_variant=44;feature_elongation=152;feature_truncation=167;synonymous_variant=11;intron_variant=2182;missense_variant=6;splice_region_variant=1	3_prime_UTR_variant=44;feature_elongation=130;feature_truncation=142;synonymous_variant=11;intron_variant=1855;missense_variant=6;splice_region_variant=1;upstream_gene_variant=61	1	0	0	1	0	16.17	53	3.83	26.42	0.88	0.39	0.6	0.44	NA	CIS
protein_coding	Cyth1	ENSMUST00000106302	ENSMUST00000017276	protein_coding	protein_coding	TRUE	TRUE	downstream_gene_variant=52;3_prime_UTR_variant=18;feature_elongation=35;feature_truncation=31;intron_variant=395;synonymous_variant=4;splice_region_variant=2;upstream_gene_variant=43	downstream_gene_variant=52;3_prime_UTR_variant=18;feature_elongation=63;feature_truncation=54;intron_variant=721;synonymous_variant=4;splice_region_variant=1;upstream_gene_variant=3	1	0	0	1	1	77.83	96.67	23	50.5	0.79	0.71	0.65	0.91	cons	CONS
protein_coding	Clic4	ENSMUST00000037099	ENSMUST00000143370	protein_coding	retained_intron	TRUE	NA	downstream_gene_variant=1;3_prime_UTR_variant=44;feature_elongation=57;feature_truncation=61;intron_variant=739;synonymous_variant=1;upstream_gene_variant=2	downstream_gene_variant=67;non_coding_exon_variant=36;nc_transcript_variant=665;feature_elongation=52;feature_truncation=52;intron_variant=629;upstream_gene_variant=2	0	1	0	0	0	125.67	134.83	59.83	54.25	0.99	0.99	1	1	cons	CONS
protein_coding	Hyal1	ENSMUST00000112387	ENSMUST00000010195	protein_coding	protein_coding	TRUE	TRUE	intron_variant=7;missense_variant=2;feature_truncation=3;3_prime_UTR_variant=8;feature_elongation=1	intron_variant=5;missense_variant=2;feature_truncation=1;3_prime_UTR_variant=3;downstream_gene_variant=7	0	0	1	1	1	96.5	109	61.17	40.25	0.88	0.8	0.85	0.95	cons	CIS&TRANS
protein_coding	Slc35a1	ENSMUST00000029970	ENSMUST00000126033	protein_coding	protein_coding	TRUE	TRUE	downstream_gene_variant=3;3_prime_UTR_variant=3;feature_truncation=20;feature_elongation=9;intron_variant=132;synonymous_variant=2;5_prime_UTR_variant=1;upstream_gene_variant=1	downstream_gene_variant=15;intron_variant=101;feature_elongation=5;feature_truncation=14;missense_variant=1;synonymous_variant=3;upstream_gene_variant=15	1	1	0	0	1	92.83	124	41.17	69.83	0.98	0.91	0.98	0.94	NA	CONS
antisense	Gm15318	ENSMUST00000148215	ENSMUST00000146320	antisense	antisense	TRUE	NA	non_coding_exon_variant=15;nc_transcript_variant=145;feature_elongation=10;intron_variant=130;feature_truncation=3;splice_region_variant=1;downstream_gene_variant=5	non_coding_exon_variant=20;nc_transcript_variant=149;feature_elongation=10;intron_variant=129;splice_region_variant=2;feature_truncation=3;downstream_gene_variant=1	0	0	0	1	1	54	105.83	40.75	16.83	0.24	0.77	0.18	0.49	cis	Not in Dataset
protein_coding	E2f1	ENSMUST00000103145	ENSMUST00000000894	protein_coding	protein_coding	TRUE	TRUE	3_prime_UTR_variant=6;synonymous_variant=3;intron_variant=28;feature_elongation=3;feature_truncation=2;missense_variant=1	downstream_gene_variant=2;3_prime_UTR_variant=4;synonymous_variant=3;intron_variant=28;feature_elongation=3;feature_truncation=2;5_prime_UTR_variant=1	0	0	1	1	1	11.33	11	1.58	2.67	0.26	0.08	0.55	0.25	NA	CONS
protein_coding	Zfp691	ENSMUST00000052715	ENSMUST00000106355	protein_coding	protein_coding	TRUE	FALSE	3_prime_UTR_variant=4;feature_truncation=1;synonymous_variant=2;missense_variant=1;intron_variant=8;5_prime_UTR_variant=3;upstream_gene_variant=3	3_prime_UTR_variant=4;feature_truncation=1;synonymous_variant=2;missense_variant=1;intron_variant=13;upstream_gene_variant=1	1	0	0	0	0	46.33	34.5	8.42	14.83	0.09	0.25	0.38	0.24	trans	CONS
protein_coding	Cdkn1b	ENSMUST00000067327	ENSMUST00000003115	protein_coding	protein_coding	TRUE	FALSE	5_prime_UTR_variant=4;feature_elongation=3;feature_truncation=3;missense_variant=1;intron_variant=1;3_prime_UTR_variant=11;downstream_gene_variant=1	5_prime_UTR_variant=4;feature_elongation=3;feature_truncation=3;missense_variant=1;intron_variant=9;3_prime_UTR_variant=3;downstream_gene_variant=1	0	0	0	0	1	49.17	43.33	27	30.5	0.24	0.31	0.25	0.31	cons	CONS
protein_coding	Cldn14	ENSMUST00000169391	ENSMUST00000177648	protein_coding	protein_coding	TRUE	FALSE	synonymous_variant=3;5_prime_UTR_variant=7;intron_variant=152;feature_truncation=9;feature_elongation=5;upstream_gene_variant=72	synonymous_variant=3;5_prime_UTR_variant=5;intron_variant=152;feature_truncation=9;feature_elongation=4;upstream_gene_variant=74	0	0	1	0	1	26.17	67.17	21	49.25	0.5	0.48	0.62	0.37	cons	CONS
protein_coding	Rsl1d1	ENSMUST00000119953	ENSMUST00000129962	protein_coding	retained_intron	TRUE	NA	downstream_gene_variant=2;3_prime_UTR_variant=6;feature_truncation=3;missense_variant=3;intron_variant=57;synonymous_variant=5;feature_elongation=4;upstream_gene_variant=1	downstream_gene_variant=8;non_coding_exon_variant=10;nc_transcript_variant=11;intron_variant=1;upstream_gene_variant=27	1	0	0	1	0	191.67	136.33	91.83	71.83	0.99	0.97	0.97	0.97	cons	CONS
protein_coding	Dctn5	ENSMUST00000033156	ENSMUST00000123602	protein_coding	retained_intron	TRUE	NA	5_prime_UTR_variant=1;intron_variant=225;feature_elongation=22;feature_truncation=14;synonymous_variant=2;splice_region_variant=1;3_prime_UTR_variant=11;downstream_gene_variant=2	non_coding_exon_variant=20;nc_transcript_variant=239;feature_elongation=22;intron_variant=219;feature_truncation=14;splice_region_variant=1;downstream_gene_variant=2	0	0	1	0	1	165.17	129.33	51.08	80.5	0.95	0.92	0.85	0.93	cons	CONS
protein_coding	Alg5	ENSMUST00000044567	ENSMUST00000155273	protein_coding	nonsense_mediated_decay	TRUE	TRUE	upstream_gene_variant=1;intron_variant=160;feature_truncation=14;feature_elongation=9;synonymous_variant=3;splice_region_variant=1;3_prime_UTR_variant=7;downstream_gene_variant=19	upstream_gene_variant=1;intron_variant=102;NMD_transcript_variant=110;feature_truncation=10;feature_elongation=7;3_prime_UTR_variant=8;downstream_gene_variant=67	0	1	1	0	1	196.67	137.17	96.08	92.42	1	0.97	0.99	0.98	NA	CONS
protein_coding	Micu1	ENSMUST00000165563	ENSMUST00000165405	protein_coding	retained_intron	TRUE	NA	upstream_gene_variant=1;5_prime_UTR_variant=1;intron_variant=2127;feature_truncation=134;feature_elongation=146;missense_variant=5;synonymous_variant=7;splice_region_variant=2;3_prime_UTR_variant=14;downstream_gene_variant=3	upstream_gene_variant=2;intron_variant=557;nc_transcript_variant=587;feature_truncation=42;feature_elongation=53;non_coding_exon_variant=30;downstream_gene_variant=77	0	1	1	0	0	107.67	140.17	51.42	46.33	0.99	0.99	0.99	1	cons	Not in Dataset
protein_coding	Cyp4a10	ENSMUST00000058785	ENSMUST00000094886	protein_coding	protein_coding	TRUE	TRUE	missense_variant=7;synonymous_variant=3;intron_variant=76;splice_region_variant=3;feature_truncation=5;feature_elongation=3;3_prime_UTR_variant=1;downstream_gene_variant=3	missense_variant=7;synonymous_variant=3;intron_variant=76;splice_region_variant=3;feature_truncation=5;feature_elongation=3;3_prime_UTR_variant=1;downstream_gene_variant=3	0	0	1	1	1	1290.83	139	509.08	84.58	0.98	0.98	0.92	0.73	NA	CIS
protein_coding	Mapk1ip1l	ENSMUST00000166743	ENSMUST00000164235	protein_coding	protein_coding	TRUE	FALSE	upstream_gene_variant=1;intron_variant=70;feature_elongation=13;feature_truncation=4;3_prime_UTR_variant=3	upstream_gene_variant=11;intron_variant=19;feature_elongation=3;feature_truncation=1;3_prime_UTR_variant=3	1	0	0	1	0	96.67	119.5	23.5	34.25	0.64	0.84	0.54	0.71	NA	Not in Dataset
protein_coding	Chpf2	ENSMUST00000121863	ENSMUST00000088295	protein_coding	protein_coding	TRUE	FALSE	5_prime_UTR_variant=9;feature_truncation=3;feature_elongation=4;intron_variant=20;synonymous_variant=2;3_prime_UTR_variant=2;downstream_gene_variant=11	5_prime_UTR_variant=9;feature_truncation=3;feature_elongation=4;intron_variant=20;synonymous_variant=2;3_prime_UTR_variant=5;downstream_gene_variant=15	0	1	1	0	0	32.83	99	36.5	45.5	0.48	0.69	0.51	0.66	NA	CONS
protein_coding	Bclaf1	ENSMUST00000092678	ENSMUST00000043881	protein_coding	protein_coding	TRUE	TRUE	intron_variant=68;feature_elongation=13;feature_truncation=9;missense_variant=1;synonymous_variant=1;3_prime_UTR_variant=7	intron_variant=68;feature_elongation=13;feature_truncation=9;missense_variant=1;synonymous_variant=1;3_prime_UTR_variant=7	0	0	0	0	1	32.5	39.17	11.33	4.5	0.38	0.27	0.5	0.5	cons	CONS
protein_coding	Plin5	ENSMUST00000019808	ENSMUST00000113072	protein_coding	protein_coding	TRUE	FALSE	downstream_gene_variant=1;3_prime_UTR_variant=2;synonymous_variant=4;intron_variant=23;feature_truncation=4;missense_variant=1;splice_region_variant=2;5_prime_UTR_variant=1;feature_elongation=1;upstream_gene_variant=1	downstream_gene_variant=1;3_prime_UTR_variant=2;synonymous_variant=4;intron_variant=22;feature_truncation=4;missense_variant=1;splice_region_variant=2;5_prime_UTR_variant=1;upstream_gene_variant=2	1	0	0	1	0	107	88.67	43.08	34.5	0.35	0.61	0.62	0.81	cis	CONS
protein_coding	Cbx3	ENSMUST00000031862	ENSMUST00000156463	protein_coding	retained_intron	TRUE	NA	upstream_gene_variant=4;5_prime_UTR_variant=2;intron_variant=80;feature_truncation=12;feature_elongation=20;synonymous_variant=3	upstream_gene_variant=5;non_coding_exon_variant=10;nc_transcript_variant=31;feature_truncation=4;feature_elongation=9;intron_variant=21;downstream_gene_variant=40	0	1	1	0	1	153.5	142.67	52.33	89.67	1	0.98	1	0.98	cis	CONS
protein_coding	Ppie	ENSMUST00000030404	ENSMUST00000137778	protein_coding	processed_transcript	TRUE	NA	downstream_gene_variant=1;3_prime_UTR_variant=4;feature_elongation=18;feature_truncation=15;intron_variant=108;synonymous_variant=3;5_prime_UTR_variant=1	downstream_gene_variant=40;non_coding_exon_variant=6;nc_transcript_variant=35;feature_elongation=5;intron_variant=29;feature_truncation=3;upstream_gene_variant=1	0	1	1	0	0	103.83	141.33	33.42	77.83	0.97	0.96	0.99	0.97	cons	CIS&TRANS
protein_coding	Fam96b	ENSMUST00000164884	ENSMUST00000163140	protein_coding	retained_intron	TRUE	NA	downstream_gene_variant=2;3_prime_UTR_variant=3;synonymous_variant=10;intron_variant=24;5_prime_UTR_variant=5;upstream_gene_variant=3	downstream_gene_variant=3;non_coding_exon_variant=12;nc_transcript_variant=36;intron_variant=24;upstream_gene_variant=8	0	0	1	1	1	114.83	119.67	58.83	84.58	0.86	0.81	0.88	0.91	cons	CONS
protein_coding	Ino80b	ENSMUST00000113935	ENSMUST00000032109	protein_coding	protein_coding	TRUE	TRUE	downstream_gene_variant=6;3_prime_UTR_variant=2;missense_variant=1;intron_variant=10;feature_elongation=1;5_prime_UTR_variant=2	downstream_gene_variant=8;missense_variant=1;intron_variant=10;feature_elongation=1;upstream_gene_variant=2	0	0	1	1	0	73.5	65.5	30.58	36.83	0.81	0.44	0.65	0.72	NA	CONS
protein_coding	Lrrfip2	ENSMUST00000035078	ENSMUST00000098340	protein_coding	protein_coding	TRUE	TRUE	5_prime_UTR_variant=6;feature_truncation=70;intron_variant=748;feature_elongation=60;splice_region_variant=1;synonymous_variant=2;3_prime_UTR_variant=16	5_prime_UTR_variant=6;feature_truncation=70;intron_variant=748;feature_elongation=60;splice_region_variant=1;synonymous_variant=2;3_prime_UTR_variant=16	0	0	0	0	1	41.33	53.67	5.33	11.92	0.44	0.36	0.57	0.46	cons	CONS
protein_coding	Pfkl	ENSMUST00000020522	ENSMUST00000148818	protein_coding	retained_intron	TRUE	NA	downstream_gene_variant=1;3_prime_UTR_variant=20;feature_elongation=16;intron_variant=252;splice_region_variant=5;feature_truncation=14;synonymous_variant=7;5_prime_UTR_variant=1;upstream_gene_variant=2	downstream_gene_variant=68;non_coding_exon_variant=6;nc_transcript_variant=36;feature_truncation=2;intron_variant=30;feature_elongation=2;upstream_gene_variant=46	1	1	0	0	0	99.83	146.33	48.83	77.25	0.99	0.98	0.98	0.99	cons	CIS
protein_coding	Cecr5	ENSMUST00000075303	ENSMUST00000141029	protein_coding	retained_intron	TRUE	NA	downstream_gene_variant=2;3_prime_UTR_variant=9;feature_truncation=20;synonymous_variant=12;missense_variant=1;intron_variant=285;feature_elongation=19;splice_region_variant=1;upstream_gene_variant=4	downstream_gene_variant=72;non_coding_exon_variant=16;nc_transcript_variant=135;feature_truncation=9;intron_variant=119;feature_elongation=10;splice_region_variant=1;upstream_gene_variant=4	0	1	1	0	1	101.67	144	63.25	79	0.99	0.96	0.97	0.98	cons	CONS
protein_coding	Fn3k	ENSMUST00000026175	ENSMUST00000103014	protein_coding	protein_coding	TRUE	TRUE	upstream_gene_variant=1;5_prime_UTR_variant=1;synonymous_variant=6;intron_variant=168;feature_truncation=11;feature_elongation=11;missense_variant=6;downstream_gene_variant=1	upstream_gene_variant=1;5_prime_UTR_variant=1;synonymous_variant=4;intron_variant=61;feature_truncation=4;feature_elongation=5;missense_variant=4;3_prime_UTR_variant=46;downstream_gene_variant=46	0	1	1	0	0	122	145.67	95.17	84.67	0.96	0.97	0.96	0.98	cons	CONS
protein_coding	Nudt22	ENSMUST00000041686	ENSMUST00000180762	protein_coding	retained_intron	TRUE	NA	downstream_gene_variant=27;intron_variant=14;splice_region_variant=1;synonymous_variant=1;feature_truncation=1;stop_gained=1;missense_variant=1;5_prime_UTR_variant=1	downstream_gene_variant=27;intron_variant=9;nc_transcript_variant=15;splice_region_variant=1;non_coding_exon_variant=6;feature_truncation=1;upstream_gene_variant=3	1	0	0	1	0	110.17	144.17	46.25	90.17	0.98	0.96	0.97	0.89	cons	CONS
protein_coding	2310067B10Rik	ENSMUST00000093912	ENSMUST00000125918	protein_coding	protein_coding	TRUE	TRUE	5_prime_UTR_variant=1;intron_variant=314;feature_elongation=33;feature_truncation=20;splice_region_variant=1;missense_variant=1;synonymous_variant=11;3_prime_UTR_variant=5	upstream_gene_variant=48;intron_variant=30;feature_elongation=3;feature_truncation=2;synonymous_variant=1;downstream_gene_variant=35	1	1	0	0	1	90.33	120.17	47.83	50.83	0.87	0.8	0.84	0.84	cons	CIS&TRANS
protein_coding	Tnxb	ENSMUST00000168533	ENSMUST00000087399	protein_coding	protein_coding	TRUE	TRUE	synonymous_variant=25;missense_variant=12;intron_variant=231;feature_truncation=9;feature_elongation=14;splice_region_variant=2;downstream_gene_variant=5	synonymous_variant=34;missense_variant=24;intron_variant=210;feature_truncation=9;feature_elongation=14;splice_region_variant=2;3_prime_UTR_variant=1;downstream_gene_variant=4	0	0	0	1	1	9.67	22.67	7.08	8.25	0.03	0.15	0.12	0.01	CIS&TRANS	CONS
protein_coding	Ube3b	ENSMUST00000074002	ENSMUST00000130169	protein_coding	nonsense_mediated_decay	TRUE	NA	intron_variant=495;feature_truncation=32;feature_elongation=33;5_prime_UTR_variant=1;synonymous_variant=20;missense_variant=3;splice_region_variant=2;3_prime_UTR_variant=18;downstream_gene_variant=2	intron_variant=495;NMD_transcript_variant=537;nc_transcript_variant=537;feature_truncation=32;feature_elongation=33;non_coding_exon_variant=42;splice_region_variant=2;downstream_gene_variant=2	0	0	1	0	1	101.33	83.17	45.33	32.25	0.24	0.55	0.41	0.56	trans	CIS&TRANS
protein_coding	Hsph1	ENSMUST00000074846	ENSMUST00000137534	protein_coding	retained_intron	TRUE	NA	downstream_gene_variant=35;3_prime_UTR_variant=10;feature_truncation=16;intron_variant=166;splice_region_variant=2;feature_elongation=13;synonymous_variant=7;missense_variant=1	downstream_gene_variant=61;non_coding_exon_variant=39;nc_transcript_variant=140;feature_truncation=9;feature_elongation=12;intron_variant=101;splice_region_variant=1	0	1	0	0	0	66.17	150.17	37.08	37.25	1	0.99	0.89	0.98	cons	CONS
protein_coding	Cmpk1	ENSMUST00000030491	ENSMUST00000133066	protein_coding	nonsense_mediated_decay	TRUE	TRUE	downstream_gene_variant=1;3_prime_UTR_variant=25;feature_elongation=32;feature_truncation=15;intron_variant=198;synonymous_variant=1;missense_variant=2;upstream_gene_variant=1	downstream_gene_variant=46;intron_variant=178;NMD_transcript_variant=181;feature_elongation=27;feature_truncation=13;splice_region_variant=1;synonymous_variant=1;missense_variant=2;upstream_gene_variant=1	0	1	1	0	1	249.33	146.17	117.5	106	1	0.96	0.95	0.93	cons	CIS&TRANS
protein_coding	Acp1	ENSMUST00000062740	ENSMUST00000074038	protein_coding	protein_coding	TRUE	TRUE	3_prime_UTR_variant=7;feature_elongation=13;feature_truncation=7;intron_variant=99;upstream_gene_variant=32	3_prime_UTR_variant=7;feature_elongation=13;feature_truncation=7;intron_variant=99;upstream_gene_variant=32	0	0	0	0	1	100.5	91.67	39.83	20.83	0.55	0.6	0.62	0.36	cons	CONS
protein_coding	Lgmn	ENSMUST00000110020	ENSMUST00000021607	protein_coding	protein_coding	TRUE	FALSE	3_prime_UTR_variant=10;synonymous_variant=9;intron_variant=360;splice_region_variant=3;feature_truncation=24;feature_elongation=24;upstream_gene_variant=33	3_prime_UTR_variant=10;synonymous_variant=9;intron_variant=500;splice_region_variant=3;feature_truncation=34;feature_elongation=42;5_prime_UTR_variant=1;upstream_gene_variant=2	1	0	0	1	0	138.67	78	54.33	56.67	0.25	0.51	0.15	0.17	NA	CONS
protein_coding	Tollip	ENSMUST00000001950	ENSMUST00000130439	protein_coding	protein_coding	TRUE	TRUE	downstream_gene_variant=3;3_prime_UTR_variant=6;intron_variant=44;feature_elongation=4;feature_truncation=2;5_prime_UTR_variant=2;upstream_gene_variant=24	downstream_gene_variant=10;intron_variant=33;feature_elongation=2;feature_truncation=1;5_prime_UTR_variant=1;upstream_gene_variant=25	0	1	1	0	1	136.33	146	69.75	73.67	0.97	0.95	0.98	0.98	cons	CONS
protein_coding	Mmab	ENSMUST00000031560	ENSMUST00000123256	protein_coding	retained_intron	TRUE	NA	3_prime_UTR_variant=25;feature_elongation=10;feature_truncation=12;intron_variant=120;synonymous_variant=3	downstream_gene_variant=40;non_coding_exon_variant=9;nc_transcript_variant=108;feature_elongation=7;intron_variant=99;feature_truncation=6	0	1	1	0	0	128.33	147.67	109.75	97.17	0.98	0.96	0.98	0.98	cons	CONS
protein_coding	Actr3	ENSMUST00000178474	ENSMUST00000027579	protein_coding	protein_coding	TRUE	FALSE	3_prime_UTR_variant=4;intron_variant=194;feature_elongation=27;feature_truncation=26;synonymous_variant=1;5_prime_UTR_variant=2	3_prime_UTR_variant=4;intron_variant=196;feature_elongation=27;feature_truncation=26;synonymous_variant=1	0	0	0	0	1	119.67	86.33	57.5	32.08	0.49	0.56	0.52	0.59	cons	CIS
protein_coding	Sepsecs	ENSMUST00000031069	ENSMUST00000150709	protein_coding	nonsense_mediated_decay	TRUE	TRUE	downstream_gene_variant=1;3_prime_UTR_variant=23;intron_variant=118;feature_elongation=13;feature_truncation=12;synonymous_variant=1;splice_region_variant=3	downstream_gene_variant=1;3_prime_UTR_variant=24;NMD_transcript_variant=142;intron_variant=118;feature_elongation=13;feature_truncation=12;splice_region_variant=3	0	0	1	1	1	58.5	139.17	18.42	58.25	0.96	0.9	0.64	0.75	cons	CIS&TRANS
protein_coding	Oxld1	ENSMUST00000044007	ENSMUST00000137632	protein_coding	protein_coding	TRUE	TRUE	downstream_gene_variant=1;3_prime_UTR_variant=3;synonymous_variant=1;missense_variant=2;intron_variant=9;feature_elongation=1;feature_truncation=2;5_prime_UTR_variant=1;upstream_gene_variant=4	downstream_gene_variant=5;missense_variant=2;intron_variant=9;feature_elongation=1;feature_truncation=2;upstream_gene_variant=5	0	0	1	1	1	84	144.83	77.17	143.75	0.9	0.93	0.96	0.92	cons	Not in Dataset
protein_coding	Tcea1	ENSMUST00000081551	ENSMUST00000165720	protein_coding	protein_coding	TRUE	TRUE	synonymous_variant=3;intron_variant=162;feature_truncation=19;feature_elongation=18;3_prime_UTR_variant=2	upstream_gene_variant=1;5_prime_UTR_variant=4;intron_variant=158;feature_truncation=19;feature_elongation=18;synonymous_variant=2;3_prime_UTR_variant=2	1	0	0	1	0	192.5	155	110.33	56.33	0.97	0.99	0.99	0.99	NA	CIS
protein_coding	Slc35e2	ENSMUST00000105608	ENSMUST00000118607	protein_coding	protein_coding	TRUE	FALSE	upstream_gene_variant=3;5_prime_UTR_variant=3;intron_variant=145;feature_elongation=26;feature_truncation=16;synonymous_variant=9;splice_region_variant=1;3_prime_UTR_variant=42;downstream_gene_variant=1	upstream_gene_variant=8;5_prime_UTR_variant=2;feature_elongation=23;intron_variant=141;feature_truncation=14;synonymous_variant=9;splice_region_variant=1;3_prime_UTR_variant=1;downstream_gene_variant=42	1	0	0	1	0	104	142.5	56.75	63.25	0.99	0.91	0.91	0.92	trans	CONS
protein_coding	Ankrd17	ENSMUST00000014421	ENSMUST00000081914	protein_coding	protein_coding	TRUE	TRUE	3_prime_UTR_variant=7;feature_elongation=99;intron_variant=827;feature_truncation=88;synonymous_variant=6;missense_variant=2;splice_region_variant=2	3_prime_UTR_variant=7;feature_elongation=99;intron_variant=828;feature_truncation=88;synonymous_variant=6;missense_variant=1;splice_region_variant=2	0	0	0	0	1	34.17	44.83	13.17	18.33	0.16	0.28	0.12	0.12	cons	CONS
protein_coding	Numa1	ENSMUST00000084852	ENSMUST00000163183	protein_coding	protein_coding	TRUE	TRUE	intron_variant=320;feature_elongation=34;feature_truncation=27;5_prime_UTR_variant=1;splice_region_variant=1;synonymous_variant=16;missense_variant=5;stop_gained=1;3_prime_UTR_variant=3	upstream_gene_variant=36;synonymous_variant=6;intron_variant=66;feature_elongation=7;feature_truncation=6;missense_variant=1;3_prime_UTR_variant=3	1	0	0	1	1	137.17	81.67	63.25	75.75	0.23	0.51	0.33	0.35	trans	CONS
protein_coding	Mtfp1	ENSMUST00000004868	ENSMUST00000123607	protein_coding	processed_transcript	TRUE	NA	3_prime_UTR_variant=10;feature_elongation=3;intron_variant=32;feature_truncation=3;synonymous_variant=2	downstream_gene_variant=34;non_coding_exon_variant=3;nc_transcript_variant=7;intron_variant=4;upstream_gene_variant=3	1	1	0	0	0	216.83	146	148.42	112.33	0.95	0.91	0.99	0.96	NA	Not in Dataset
protein_coding	Arhgef12	ENSMUST00000165665	ENSMUST00000072767	protein_coding	protein_coding	TRUE	TRUE	3_prime_UTR_variant=17;feature_elongation=69;feature_truncation=75;intron_variant=822;missense_variant=4;synonymous_variant=5;splice_region_variant=1;5_prime_UTR_variant=1	3_prime_UTR_variant=17;feature_elongation=69;feature_truncation=75;intron_variant=822;missense_variant=4;synonymous_variant=5;splice_region_variant=1;upstream_gene_variant=1	0	0	1	1	1	60.5	67.5	29.08	16.83	0.36	0.42	0.32	0.63	CIS&TRANS	CIS&TRANS
protein_coding	Prosc	ENSMUST00000033875	ENSMUST00000098851	protein_coding	protein_coding	TRUE	TRUE	5_prime_UTR_variant=2;intron_variant=124;feature_truncation=15;feature_elongation=8;synonymous_variant=2;missense_variant=1;splice_region_variant=1;inframe_insertion=1;3_prime_UTR_variant=23;downstream_gene_variant=3	5_prime_UTR_variant=2;intron_variant=87;feature_truncation=5;feature_elongation=5;synonymous_variant=2;missense_variant=1;3_prime_UTR_variant=4;downstream_gene_variant=46	0	1	0	0	1	198.5	156.5	97.5	100.08	0.95	0.96	0.93	0.98	cons	CIS
protein_coding	Hsd3b2	ENSMUST00000107022	ENSMUST00000107021	protein_coding	protein_coding	TRUE	FALSE	downstream_gene_variant=2;feature_elongation=11;3_prime_UTR_variant=28;feature_truncation=8;synonymous_variant=2;missense_variant=3;splice_region_variant=1;intron_variant=156;5_prime_UTR_variant=6;upstream_gene_variant=2	downstream_gene_variant=25;3_prime_UTR_variant=5;feature_elongation=10;synonymous_variant=2;missense_variant=3;splice_region_variant=1;intron_variant=157;feature_truncation=6;5_prime_UTR_variant=6;upstream_gene_variant=1	0	0	1	1	1	237.5	160.17	104.83	104.58	0.96	0.98	0.93	0.98	CIS&TRANS	CIS
protein_coding	Tubg1	ENSMUST00000043680	ENSMUST00000137844	protein_coding	processed_transcript	TRUE	NA	upstream_gene_variant=2;5_prime_UTR_variant=3;intron_variant=55;feature_elongation=2;synonymous_variant=8;splice_region_variant=2;feature_truncation=1;3_prime_UTR_variant=2;downstream_gene_variant=1	upstream_gene_variant=44;intron_variant=4;nc_transcript_variant=16;feature_elongation=1;non_coding_exon_variant=12;downstream_gene_variant=11	1	1	0	0	0	203.5	161.83	118.58	101.08	0.96	0.99	0.96	0.99	NA	CIS
protein_coding	Isca1	ENSMUST00000057115	ENSMUST00000160628	protein_coding	retained_intron	TRUE	NA	downstream_gene_variant=3;3_prime_UTR_variant=7;intron_variant=114;feature_truncation=4;feature_elongation=11;5_prime_UTR_variant=1;upstream_gene_variant=29	downstream_gene_variant=38;non_coding_exon_variant=23;nc_transcript_variant=84;feature_elongation=9;intron_variant=61;feature_truncation=1;upstream_gene_variant=29	0	1	1	0	0	321.5	161.83	150.58	98.42	0.99	0.98	0.99	0.99	cons	CIS
protein_coding	Psme4	ENSMUST00000041231	ENSMUST00000129824	protein_coding	protein_coding	TRUE	TRUE	upstream_gene_variant=1;5_prime_UTR_variant=2;synonymous_variant=6;intron_variant=687;feature_elongation=84;feature_truncation=65;splice_region_variant=3;missense_variant=1;3_prime_UTR_variant=2;downstream_gene_variant=1	upstream_gene_variant=33;intron_variant=22;feature_elongation=2;feature_truncation=4;3_prime_UTR_variant=4;downstream_gene_variant=46	1	1	0	0	0	126.67	163.67	69.42	71.08	0.93	0.99	0.94	1	cis	CONS
protein_coding	Cd9	ENSMUST00000032492	ENSMUST00000140024	protein_coding	retained_intron	TRUE	NA	3_prime_UTR_variant=1;feature_elongation=28;intron_variant=279;feature_truncation=21;5_prime_UTR_variant=1	downstream_gene_variant=6;intron_variant=4;nc_transcript_variant=6;non_coding_exon_variant=2;feature_truncation=1;upstream_gene_variant=23	1	1	0	0	0	153.83	150.5	80.75	48.08	0.97	0.91	0.92	0.76	trans	CONS
protein_coding	2410001C21Rik	ENSMUST00000029005	ENSMUST00000140048	protein_coding	processed_transcript	TRUE	NA	intron_variant=313;feature_elongation=28;feature_truncation=30;synonymous_variant=4;missense_variant=1;inframe_deletion=1;splice_region_variant=1;3_prime_UTR_variant=6	upstream_gene_variant=27;non_coding_exon_variant=15;nc_transcript_variant=144;intron_variant=129;feature_elongation=12;feature_truncation=15;splice_region_variant=1	1	0	0	0	0	364.83	163.83	157.58	123.08	0.99	0.99	0.91	1	cons	CIS&TRANS
protein_coding	Znfx1	ENSMUST00000048988	ENSMUST00000067584	protein_coding	protein_coding	TRUE	TRUE	3_prime_UTR_variant=4;feature_elongation=22;synonymous_variant=7;missense_variant=2;intron_variant=186;feature_truncation=18;splice_region_variant=1;5_prime_UTR_variant=2	3_prime_UTR_variant=4;feature_elongation=5;synonymous_variant=2;missense_variant=1;intron_variant=31;feature_truncation=1;splice_region_variant=2;5_prime_UTR_variant=1;upstream_gene_variant=24	1	0	0	1	0	63.33	51.33	24.42	24.67	0.13	0.31	0.18	0.23	NA	CONS
protein_coding	Zfp74	ENSMUST00000108212	ENSMUST00000108205	protein_coding	protein_coding	TRUE	TRUE	downstream_gene_variant=5;3_prime_UTR_variant=28;feature_elongation=23;feature_truncation=12;intron_variant=146;5_prime_UTR_variant=2;upstream_gene_variant=92	downstream_gene_variant=38;3_prime_UTR_variant=24;feature_elongation=21;synonymous_variant=9;intron_variant=259;feature_truncation=20;5_prime_UTR_variant=8	1	1	0	0	1	7.33	8.33	1.92	4.25	0.13	0.05	0.13	0.11	cons	CONS
protein_coding	Bnip3l	ENSMUST00000022634	ENSMUST00000138160	protein_coding	processed_transcript	TRUE	NA	3_prime_UTR_variant=11;feature_truncation=16;intron_variant=122;synonymous_variant=1;feature_elongation=9;splice_region_variant=1	downstream_gene_variant=10;non_coding_exon_variant=3;nc_transcript_variant=6;intron_variant=3;feature_truncation=1;upstream_gene_variant=20	1	0	0	1	0	181.5	128.5	97	77.08	0.69	0.77	0.96	0.84	cons	CONS
protein_coding	Commd9	ENSMUST00000028584	ENSMUST00000133576	protein_coding	retained_intron	TRUE	NA	intron_variant=66;feature_truncation=7;feature_elongation=4;synonymous_variant=2;3_prime_UTR_variant=1	intron_variant=55;nc_transcript_variant=56;feature_truncation=5;feature_elongation=4;non_coding_exon_variant=1;downstream_gene_variant=13	0	1	1	0	0	153.33	155.67	101.75	56.5	0.69	0.93	0.97	0.9	NA	CIS
protein_coding	Anapc2	ENSMUST00000028341	ENSMUST00000129265	protein_coding	processed_transcript	TRUE	NA	upstream_gene_variant=25;inframe_deletion=2;intron_variant=65;synonymous_variant=4;feature_elongation=4;feature_truncation=5	upstream_gene_variant=26;intron_variant=15;nc_transcript_variant=17;non_coding_exon_variant=2;feature_elongation=1;downstream_gene_variant=30	0	1	1	0	1	145.33	157.5	61.67	85.75	0.97	0.94	0.98	1	CIS&TRANS	CONS
protein_coding	Ubl3	ENSMUST00000079324	ENSMUST00000164904	protein_coding	protein_coding	TRUE	FALSE	downstream_gene_variant=1;3_prime_UTR_variant=8;feature_elongation=37;intron_variant=362;splice_region_variant=1;feature_truncation=33;5_prime_UTR_variant=8;upstream_gene_variant=3	downstream_gene_variant=4;3_prime_UTR_variant=5;feature_elongation=36;intron_variant=364;splice_region_variant=1;feature_truncation=33;5_prime_UTR_variant=6;upstream_gene_variant=3	0	0	1	1	1	148.67	146.17	83.17	81.08	0.87	0.87	0.87	0.83	cons	CONS
protein_coding	Eif2b5	ENSMUST00000003320	ENSMUST00000148714	protein_coding	protein_coding	TRUE	TRUE	intron_variant=20;feature_elongation=2;feature_truncation=5;splice_region_variant=1;3_prime_UTR_variant=2;downstream_gene_variant=1	upstream_gene_variant=13;intron_variant=4;3_prime_UTR_variant=1;downstream_gene_variant=2	1	0	0	1	1	100.5	127.83	45.83	44.08	0.54	0.76	0.61	0.45	cons	CONS
protein_coding	Echdc1	ENSMUST00000160399	ENSMUST00000020034	protein_coding	protein_coding	TRUE	TRUE	upstream_gene_variant=2;5_prime_UTR_variant=2;splice_region_variant=1;intron_variant=378;feature_elongation=42;feature_truncation=26;missense_variant=2;3_prime_UTR_variant=21;downstream_gene_variant=16	upstream_gene_variant=12;5_prime_UTR_variant=1;intron_variant=369;feature_elongation=41;feature_truncation=27;missense_variant=2;3_prime_UTR_variant=37	1	0	0	1	0	174.5	119.5	78.25	60.58	0.46	0.71	0.47	0.58	cis	CIS
protein_coding	Pnrc2	ENSMUST00000030436	ENSMUST00000142585	protein_coding	protein_coding	TRUE	TRUE	downstream_gene_variant=1;3_prime_UTR_variant=2;intron_variant=5;5_prime_UTR_variant=1;upstream_gene_variant=1	downstream_gene_variant=3;intron_variant=4;5_prime_UTR_variant=2;upstream_gene_variant=1	1	0	0	1	0	214.83	153.83	121.58	82.33	0.97	0.91	0.95	0.95	trans	CONS
protein_coding	Rnaseh2c	ENSMUST00000025864	ENSMUST00000127071	protein_coding	retained_intron	TRUE	NA	upstream_gene_variant=1;synonymous_variant=2;intron_variant=2;3_prime_UTR_variant=3	upstream_gene_variant=1;non_coding_exon_variant=3;nc_transcript_variant=4;intron_variant=1;downstream_gene_variant=3	0	0	1	1	1	240.83	152.5	172.58	205.25	0.91	0.9	0.89	0.99	cons	CONS
protein_coding	Lsm4	ENSMUST00000034311	ENSMUST00000153689	protein_coding	retained_intron	TRUE	NA	5_prime_UTR_variant=4;feature_truncation=3;intron_variant=29;feature_elongation=1;synonymous_variant=2;3_prime_UTR_variant=1;downstream_gene_variant=2	upstream_gene_variant=29;non_coding_exon_variant=1;nc_transcript_variant=1;downstream_gene_variant=8	1	1	0	0	0	276.67	161.17	249	99.33	0.97	0.95	0.98	0.92	cons	CIS&TRANS
protein_coding	H2afv	ENSMUST00000109737	ENSMUST00000093346	protein_coding	protein_coding	TRUE	TRUE	downstream_gene_variant=5;3_prime_UTR_variant=17;feature_elongation=17;feature_truncation=12;intron_variant=118;synonymous_variant=2;5_prime_UTR_variant=1	downstream_gene_variant=20;3_prime_UTR_variant=2;intron_variant=118;feature_truncation=11;synonymous_variant=2;feature_elongation=15;upstream_gene_variant=1	0	0	1	1	1	158.83	90.67	122.92	98.25	0.44	0.53	0.49	0.72	cons	CONS
protein_coding	Pik3r1	ENSMUST00000055518	ENSMUST00000035532	protein_coding	protein_coding	TRUE	TRUE	3_prime_UTR_variant=10;feature_truncation=81;feature_elongation=90;intron_variant=959;splice_region_variant=2;synonymous_variant=6;5_prime_UTR_variant=2	3_prime_UTR_variant=10;feature_truncation=8;feature_elongation=8;intron_variant=51;splice_region_variant=2;synonymous_variant=5;missense_variant=1;5_prime_UTR_variant=5;upstream_gene_variant=44	1	0	0	0	0	46.5	99.33	31.83	41.75	0.38	0.58	0.54	0.51	NA	CIS&TRANS
protein_coding	Usp19	ENSMUST00000178075	ENSMUST00000006854	protein_coding	protein_coding	TRUE	TRUE	5_prime_UTR_variant=1;intron_variant=42;synonymous_variant=13;splice_region_variant=1;missense_variant=4;feature_elongation=1;feature_truncation=1	5_prime_UTR_variant=1;intron_variant=41;synonymous_variant=13;splice_region_variant=1;missense_variant=4;feature_elongation=1;feature_truncation=1;downstream_gene_variant=1	0	1	0	0	1	96.33	113.67	26.08	51.08	0.71	0.66	0.63	0.83	cons	CONS
protein_coding	Fads6	ENSMUST00000056153	ENSMUST00000141006	protein_coding	processed_transcript	TRUE	NA	downstream_gene_variant=2;3_prime_UTR_variant=35;feature_truncation=11;feature_elongation=7;intron_variant=81;synonymous_variant=1;splice_region_variant=2;upstream_gene_variant=1	downstream_gene_variant=33;non_coding_exon_variant=26;nc_transcript_variant=34;feature_truncation=3;intron_variant=8;feature_elongation=1;upstream_gene_variant=1	0	1	1	0	1	243.33	163.83	134.08	81.67	0.97	0.95	0.97	0.97	cons	CIS
protein_coding	Eif1a	ENSMUST00000078079	ENSMUST00000168382	protein_coding	protein_coding	TRUE	FALSE	upstream_gene_variant=41;5_prime_UTR_variant=2;intron_variant=74;feature_elongation=10;feature_truncation=6;synonymous_variant=1;3_prime_UTR_variant=14	upstream_gene_variant=41;5_prime_UTR_variant=2;intron_variant=75;feature_elongation=9;feature_truncation=6;synonymous_variant=1;3_prime_UTR_variant=10;downstream_gene_variant=3	0	0	1	1	1	99.83	121.33	60.83	48.5	0.79	0.7	0.88	0.72	cons	CONS
protein_coding	Ahnak	ENSMUST00000092955	ENSMUST00000092956	protein_coding	protein_coding	TRUE	TRUE	upstream_gene_variant=2;intron_variant=712;feature_elongation=64;feature_truncation=65;5_prime_UTR_variant=1;synonymous_variant=3;3_prime_UTR_variant=2;downstream_gene_variant=2	upstream_gene_variant=2;intron_variant=99;feature_elongation=10;feature_truncation=10;5_prime_UTR_variant=1;synonymous_variant=40;missense_variant=26;3_prime_UTR_variant=1;downstream_gene_variant=54	0	1	0	0	0	27.33	12.17	4.92	4.17	0.81	0.07	0.53	0	cis	CONS
protein_coding	Tln1	ENSMUST00000030187	ENSMUST00000123985	protein_coding	processed_transcript	TRUE	NA	3_prime_UTR_variant=2;intron_variant=141;feature_elongation=11;splice_region_variant=3;synonymous_variant=17;feature_truncation=12;5_prime_UTR_variant=1;upstream_gene_variant=35	downstream_gene_variant=41;non_coding_exon_variant=5;nc_transcript_variant=16;intron_variant=11;feature_elongation=2;upstream_gene_variant=35	0	1	1	0	0	119.5	167.67	85.67	86.25	0.94	0.96	0.93	0.95	cons	CONS
protein_coding	Mrpl40	ENSMUST00000023391	ENSMUST00000119273	protein_coding	protein_coding	TRUE	TRUE	3_prime_UTR_variant=5;synonymous_variant=3;intron_variant=40;feature_truncation=6;feature_elongation=3;5_prime_UTR_variant=2;upstream_gene_variant=1	downstream_gene_variant=3;3_prime_UTR_variant=2;synonymous_variant=3;intron_variant=40;feature_truncation=6;feature_elongation=3;upstream_gene_variant=3	0	0	1	1	1	98	87.5	67.5	58.08	0.5	0.5	0.72	0.53	cons	CONS
protein_coding	Tdeanc2	ENSMUST00000057043	ENSMUST00000127720	protein_coding	nonsense_mediated_decay	TRUE	TRUE	downstream_gene_variant=1;3_prime_UTR_variant=35;feature_elongation=26;feature_truncation=32;synonymous_variant=2;intron_variant=388;missense_variant=1;5_prime_UTR_variant=1;upstream_gene_variant=5	downstream_gene_variant=35;3_prime_UTR_variant=1;NMD_transcript_variant=391;intron_variant=389;feature_elongation=24;feature_truncation=29;synonymous_variant=1;upstream_gene_variant=6	0	0	1	1	1	46	42	11.92	32.58	0.21	0.24	0.5	0.29	cons	Not in Dataset
protein_coding	Tenc1	ENSMUST00000169627	ENSMUST00000046144	protein_coding	protein_coding	TRUE	TRUE	intron_variant=54;feature_truncation=4;feature_elongation=7;synonymous_variant=6;splice_region_variant=5;missense_variant=1;3_prime_UTR_variant=1	intron_variant=53;feature_truncation=4;feature_elongation=7;synonymous_variant=6;splice_region_variant=4;missense_variant=2;3_prime_UTR_variant=1	0	0	0	1	1	135	168.17	101.75	85.75	0.96	0.96	0.96	0.92	cons	CONS
protein_coding	Itpa	ENSMUST00000103193	ENSMUST00000156382	protein_coding	retained_intron	TRUE	NA	upstream_gene_variant=1;5_prime_UTR_variant=1;synonymous_variant=4;intron_variant=186;feature_elongation=16;feature_truncation=9;missense_variant=1;3_prime_UTR_variant=10	upstream_gene_variant=2;non_coding_exon_variant=8;nc_transcript_variant=116;intron_variant=108;feature_elongation=7;feature_truncation=4;downstream_gene_variant=75	0	1	1	0	0	164.5	172.5	96.17	124.25	0.98	0.98	0.96	0.99	cons	CONS
protein_coding	Rnf7	ENSMUST00000057500	ENSMUST00000128955	protein_coding	processed_transcript	TRUE	NA	downstream_gene_variant=3;3_prime_UTR_variant=10;feature_elongation=10;feature_truncation=12;intron_variant=89;splice_region_variant=1;synonymous_variant=1;5_prime_UTR_variant=1;upstream_gene_variant=2	downstream_gene_variant=37;non_coding_exon_variant=2;nc_transcript_variant=66;intron_variant=64;feature_truncation=7;feature_elongation=7;upstream_gene_variant=3	0	1	1	0	0	197.67	127.67	122	70.42	0.96	0.72	1	0.78	cis	Not in Dataset
protein_coding	Dmwd	ENSMUST00000108479	ENSMUST00000146429	protein_coding	processed_transcript	TRUE	NA	upstream_gene_variant=2;missense_variant=1;intron_variant=20;feature_elongation=1;synonymous_variant=2;3_prime_UTR_variant=1	upstream_gene_variant=12;non_coding_exon_variant=4;nc_transcript_variant=14;intron_variant=10	1	0	0	1	1	60.67	72.83	18.42	26.5	0.59	0.41	0.4	0.75	CIS&TRANS	CONS
protein_coding	Ddx56	ENSMUST00000004507	ENSMUST00000139073	protein_coding	retained_intron	TRUE	NA	3_prime_UTR_variant=1;missense_variant=1;intron_variant=27;feature_elongation=4;feature_truncation=2;synonymous_variant=4;5_prime_UTR_variant=1;upstream_gene_variant=12	downstream_gene_variant=19;non_coding_exon_variant=5;nc_transcript_variant=6;feature_elongation=1;intron_variant=1;upstream_gene_variant=9	1	1	0	0	0	151.67	164.67	68.58	103.5	0.97	0.92	0.99	0.95	NA	CONS
protein_coding	Snrpc	ENSMUST00000071006	ENSMUST00000137581	protein_coding	retained_intron	TRUE	NA	upstream_gene_variant=2;5_prime_UTR_variant=3;intron_variant=41;feature_truncation=12	upstream_gene_variant=5;intron_variant=25;nc_transcript_variant=41;feature_truncation=12;non_coding_exon_variant=16	0	0	1	1	1	231.5	182.33	21.67	16.17	0.99	0.99	0.62	0.81	cons	CONS
protein_coding	Dapk3	ENSMUST00000178422	ENSMUST00000047665	protein_coding	protein_coding	TRUE	FALSE	intron_variant=43;feature_elongation=6;feature_truncation=3;synonymous_variant=3;splice_region_variant=2	intron_variant=43;feature_elongation=6;feature_truncation=3;synonymous_variant=3;splice_region_variant=2	1	0	0	0	0	134.67	156	114.25	107.17	0.88	0.84	1	0.99	cons	CONS
protein_coding	Scrib	ENSMUST00000136390	ENSMUST00000063747	protein_coding	protein_coding	TRUE	TRUE	splice_region_variant=4;intron_variant=97;feature_elongation=7;missense_variant=4;synonymous_variant=4;feature_truncation=12;upstream_gene_variant=26	splice_region_variant=4;intron_variant=125;feature_elongation=9;missense_variant=4;synonymous_variant=9;feature_truncation=16;upstream_gene_variant=9	1	0	0	0	1	32.67	44.67	19.42	14.58	0.44	0.24	0.5	0.36	cons	CONS
protein_coding	Cript	ENSMUST00000024959	ENSMUST00000160269	protein_coding	protein_coding	TRUE	TRUE	upstream_gene_variant=2;5_prime_UTR_variant=3;intron_variant=156;feature_elongation=17;synonymous_variant=2;feature_truncation=7;splice_region_variant=1;3_prime_UTR_variant=3;downstream_gene_variant=2	upstream_gene_variant=4;missense_variant=1;intron_variant=156;feature_elongation=17;synonymous_variant=2;feature_truncation=7;splice_region_variant=1;3_prime_UTR_variant=1;downstream_gene_variant=4	0	0	1	1	1	223.5	95.33	97.83	73	1	0.51	0.99	0.78	CIS&TRANS	CONS
protein_coding	Abca6	ENSMUST00000044003	ENSMUST00000150988	protein_coding	processed_transcript	TRUE	NA	intron_variant=973;feature_truncation=49;feature_elongation=52;splice_region_variant=3;synonymous_variant=16;missense_variant=14;5_prime_UTR_variant=3;upstream_gene_variant=1	downstream_gene_variant=92;non_coding_exon_variant=15;nc_transcript_variant=223;intron_variant=208;feature_elongation=14;feature_truncation=12;upstream_gene_variant=1	0	1	0	0	0	109.83	184.17	89.58	80.92	0.83	0.98	0.91	0.99	cis	CIS&TRANS
protein_coding	Scamp4	ENSMUST00000079883	ENSMUST00000180350	protein_coding	protein_coding	TRUE	FALSE	upstream_gene_variant=1;intron_variant=71;feature_truncation=5;feature_elongation=8;synonymous_variant=3;splice_region_variant=1;3_prime_UTR_variant=8;downstream_gene_variant=1	upstream_gene_variant=2;intron_variant=70;feature_truncation=5;feature_elongation=7;synonymous_variant=3;splice_region_variant=1;downstream_gene_variant=9	1	0	0	1	0	207	179.83	108.17	116.33	0.95	0.95	0.98	0.96	cons	CONS
protein_coding	Cwc25	ENSMUST00000124356	ENSMUST00000018685	processed_transcript	protein_coding	TRUE	NA	non_coding_exon_variant=16;nc_transcript_variant=52;feature_truncation=3;intron_variant=36;feature_elongation=6;upstream_gene_variant=41	downstream_gene_variant=2;3_prime_UTR_variant=12;feature_truncation=18;intron_variant=189;missense_variant=1;feature_elongation=12;synonymous_variant=1;splice_region_variant=1;5_prime_UTR_variant=1;upstream_gene_variant=1	1	0	0	1	0	23.83	26.67	7.58	11.75	0.16	0.14	0.26	0.25	cons	Not in Dataset
protein_coding	Ecsit	ENSMUST00000180180	ENSMUST00000098937	protein_coding	protein_coding	TRUE	FALSE	downstream_gene_variant=40;intron_variant=114;missense_variant=3;feature_truncation=10;synonymous_variant=1;feature_elongation=9;5_prime_UTR_variant=4;upstream_gene_variant=1	downstream_gene_variant=40;intron_variant=114;missense_variant=3;feature_truncation=10;synonymous_variant=1;feature_elongation=9;5_prime_UTR_variant=4;upstream_gene_variant=1	0	0	1	0	1	131.83	99.17	98.17	48	0.5	0.52	0.57	0.53	cons	CIS&TRANS
protein_coding	Impa1	ENSMUST00000065938	ENSMUST00000118410	protein_coding	protein_coding	TRUE	TRUE	downstream_gene_variant=1;3_prime_UTR_variant=25;feature_truncation=22;feature_elongation=21;synonymous_variant=3;intron_variant=258;splice_region_variant=2;upstream_gene_variant=3	downstream_gene_variant=7;3_prime_UTR_variant=46;feature_truncation=22;feature_elongation=21;missense_variant=2;synonymous_variant=3;intron_variant=229;splice_region_variant=2;upstream_gene_variant=3	0	0	0	1	1	254.5	185.17	130.17	90.92	0.98	0.97	0.97	0.96	cons	CIS
protein_coding	Kpna2	ENSMUST00000018506	ENSMUST00000156495	protein_coding	retained_intron	TRUE	NA	intron_variant=69;splice_region_variant=4;feature_elongation=9;feature_truncation=8;synonymous_variant=1;5_prime_UTR_variant=3;upstream_gene_variant=1	downstream_gene_variant=26;non_coding_exon_variant=1;nc_transcript_variant=4;intron_variant=3;feature_elongation=1;feature_truncation=1;upstream_gene_variant=28	1	1	0	0	0	219	192.33	80.58	78.17	0.99	1	0.99	0.99	trans	CONS
protein_coding	Aacs	ENSMUST00000031445	ENSMUST00000144361	protein_coding	retained_intron	TRUE	NA	intron_variant=577;feature_truncation=30;feature_elongation=37;synonymous_variant=15;splice_region_variant=4;3_prime_UTR_variant=2	upstream_gene_variant=108;non_coding_exon_variant=10;nc_transcript_variant=126;splice_region_variant=3;intron_variant=116;feature_truncation=5;feature_elongation=6;downstream_gene_variant=31	1	1	0	0	1	462.17	186	358.67	209.58	0.97	0.96	0.9	0.97	NA	CIS&TRANS
protein_coding	Depdc7	ENSMUST00000028595	ENSMUST00000144133	protein_coding	retained_intron	TRUE	NA	3_prime_UTR_variant=2;synonymous_variant=5;intron_variant=197;feature_elongation=23;feature_truncation=22;missense_variant=1;5_prime_UTR_variant=1;upstream_gene_variant=1	downstream_gene_variant=7;non_coding_exon_variant=8;nc_transcript_variant=8;feature_elongation=3;feature_truncation=1;upstream_gene_variant=40	1	1	0	0	0	138.83	175.17	71.25	107.25	0.89	0.9	0.92	0.95	cons	CIS
protein_coding	Fam20c	ENSMUST00000026972	ENSMUST00000160645	protein_coding	nonsense_mediated_decay	TRUE	TRUE	5_prime_UTR_variant=9;missense_variant=2;intron_variant=630;feature_truncation=37;feature_elongation=38;splice_region_variant=3;synonymous_variant=4	upstream_gene_variant=2;5_prime_UTR_variant=7;NMD_transcript_variant=643;missense_variant=1;intron_variant=630;feature_truncation=37;3_prime_UTR_variant=5;feature_elongation=38;splice_region_variant=3	0	0	1	1	1	166.33	187.5	108.33	99.33	0.99	0.96	0.95	0.87	cons	CIS&TRANS
protein_coding	Tfam	ENSMUST00000092430	ENSMUST00000105432	protein_coding	protein_coding	TRUE	TRUE	downstream_gene_variant=1;3_prime_UTR_variant=53;feature_elongation=13;feature_truncation=10;intron_variant=76;synonymous_variant=1;5_prime_UTR_variant=1	downstream_gene_variant=53;3_prime_UTR_variant=1;intron_variant=77;feature_elongation=9;feature_truncation=7;synonymous_variant=1	0	0	0	1	1	67.83	80.17	41	27.5	0.74	0.41	0.95	0.89	cons	CONS
protein_coding	Pop7	ENSMUST00000111035	ENSMUST00000031728	protein_coding	protein_coding	TRUE	FALSE	downstream_gene_variant=2;3_prime_UTR_variant=3;synonymous_variant=2;5_prime_UTR_variant=3;upstream_gene_variant=3	downstream_gene_variant=2;3_prime_UTR_variant=3;synonymous_variant=2;intron_variant=1;5_prime_UTR_variant=4;upstream_gene_variant=1	0	0	1	1	1	52.67	45.17	27.33	26.25	0.28	0.23	0.25	0.4	cons	CONS
protein_coding	Anxa7	ENSMUST00000065504	ENSMUST00000100844	protein_coding	protein_coding	TRUE	FALSE	3_prime_UTR_variant=20;feature_elongation=21;feature_truncation=18;synonymous_variant=4;intron_variant=156;missense_variant=1;5_prime_UTR_variant=1	3_prime_UTR_variant=20;feature_elongation=21;feature_truncation=18;synonymous_variant=4;intron_variant=156;missense_variant=1;5_prime_UTR_variant=1	0	0	0	0	1	337.83	188.83	174.08	90.92	0.86	0.96	0.91	0.8	NA	CONS
protein_coding	Gna11	ENSMUST00000043604	ENSMUST00000146984	protein_coding	retained_intron	TRUE	NA	3_prime_UTR_variant=4;feature_elongation=8;synonymous_variant=2;intron_variant=102;feature_truncation=13	downstream_gene_variant=2;non_coding_exon_variant=6;nc_transcript_variant=6;feature_elongation=1;upstream_gene_variant=51	1	0	0	1	0	172.83	193.83	86.83	133.17	0.98	0.98	0.99	0.99	cons	CONS
protein_coding	H2-Ab1	ENSMUST00000040828	ENSMUST00000173103	protein_coding	retained_intron	TRUE	NA	upstream_gene_variant=5;5_prime_UTR_variant=2;synonymous_variant=12;missense_variant=21;intron_variant=131;feature_elongation=9;stop_gained=1;feature_truncation=2;splice_region_variant=3;3_prime_UTR_variant=7;downstream_gene_variant=5	upstream_gene_variant=92;non_coding_exon_variant=33;nc_transcript_variant=45;intron_variant=12;downstream_gene_variant=47	1	1	0	0	0	203.5	197.5	182.75	127.17	0.97	0.99	1	0.91	NA	CIS
protein_coding	Nhp2	ENSMUST00000127405	ENSMUST00000001083	protein_coding	retained_intron	TRUE	NA	upstream_gene_variant=2;5_prime_UTR_variant=1;missense_variant=1;intron_variant=23;feature_elongation=2;feature_truncation=3;3_prime_UTR_variant=4;downstream_gene_variant=17	upstream_gene_variant=3;non_coding_exon_variant=4;nc_transcript_variant=26;intron_variant=22;feature_elongation=2;feature_truncation=2;downstream_gene_variant=19	0	0	1	1	1	154.67	185.67	92.33	133.25	0.76	0.93	0.76	0.89	NA	CONS
[truncated: 456 more rows]
